# Supplementary material for: Unraveling determinants of transcription factor binding outside the core binding site
Source: HighWire-hosted journal article supplement (doi:10.1101/gr.185033.114), 2015-03-11
Supplement: BunDLE-seq_data.xlsx [file BunDLE-seq_data.xlsx]

## Sheet: main_lib
ID	sequence	Gcn4 binding score (cocn 1:3)	Gal4 binding score (conc 1:1)	Histones binding score
1	GGGGACCAGGTGCCGTAAGTAGGTTAGTTTAGAGCTTGACGGGGAAAGCCGGCGAACGTGGCGAGAAAGGAAGGGAAGAAAGCGTTTTCATTTTTTTTTTTCCACCTAGCGGATGACTCTTTTTTTTTCTTAGCGATCCTAGGGCGATCA	NaN	0.16	0.94
2	GGGGACCAGGTGCCGTAAGAATATGGGATCGGATTAGAAGCCGCCGAGCGGGCGACAGCCCTCCGACGGAAGACTCTCCTCCGTGCGTCCTCGTCTTCGAAACGCAGATGTGCCTCGCGCCGCACTGCTCCGGCGATCCTAGGGCGATCA	0.22	4.22	1.21
3	GGGGACCAGGTGCCGTAAGAATCCGGTACCACGTTTTCGCATAGAACGCAACTGCACAATGCCAAAAAAAGTAAAAGTGATTAAAAGAGTTAATCTCTAAATGAATCGATACAACCTTGGCACTCACACGTGGCGATCCTAGGGCGATCA	0.19	0.08	0.82
4	GGGGACCAGGTGCCGTAAGGCTCGCATATGTTCTGGCCCGTCGGGTTTTCTGACAAATTGTCCTTTAGGGATTTTTCGGTTTGGCTCGGGTTGGCAAAGTCGGCTGGCAACAAACCAGGACATATATAAAGGGCGATCCTAGGGCGATCA	0.09	0.1	0.91
5	GGGGACCAGGTGCCGTAAGACCGAAAGTACACAACTGTTTTCCATTTTTTTTTTTTTTTTTTCAGTGATCATCGTCCATGAAAAAAATTTTTCATTTGTCTCTTTCGTGCTTCCTGGATATATAAAATACGAGCGATCCTAGGGCGATCA	0.37	0.17	0.61
6	GGGGACCAGGTGCCGTAAGACACTTTGTCTAGAGCTTGACGGGGAAAGCCGGCGAACGTGGCGAGAAAGGAAGGGAAGAAAGCGTTTTCATTTTTTTTTTTCCACCTAGCGGATGACTCTTTTTTTTTCCGCGCGATCCTAGGGCGATCA	0.2	0.11	1.02
7	GGGGACCAGGTGCCGTAAGTAGGACAATTTAGAGCTTGACGGGGAAAGCCGGCGAACGTGGCGAGAAAGGAAGGGAAGAAAGCGTTTTCATTTTTTTTTTTCCACCTAGCGGATGACTCTTTTTTTTCTATAGCGATCCTAGGGCGATCA	NaN	0.08	0.75
8	GGGGACCAGGTGCCGTAAGCATTCGCCAATAGAGCTTGACGGGGAAAGCCGGCGAACGTGGCGAGAAAGGAAGGGAAGAAAGCGTTTTCATTTTTTTTTTTCCACCTAGCGGATGACTCTTTTGGCTTCTTAGCGATCCTAGGGCGATCA	0.14	0.31	1
9	GGGGACCAGGTGCCGTAAGTACACTGCCTTAGAGCTTGACGGGGAAAGCCGGCGAACGTGGCGAGAAAGGAAGGGAAGAAAGCGTTTTCATTTTTTTTTTTCCACCTAGCGGATGACTCGGCTTTTTTCTTAGCGATCCTAGGGCGATCA	0.26	0.07	1.05
10	GGGGACCAGGTGCCGTAAGAGCCTGCACGTAGAGCTTGACGGGGAAAGCCGGCGAACGTGGCGAGAAAGGAAGGGAAGAAAGCGTTTTCATTTTTTTTTTTCCACCTAGCGGATGCGGCTTTTTTTTTCTTAGCGATCCTAGGGCGATCA	0.09	0.11	0.95
11	GGGGACCAGGTGCCGTAAGATACCACCGTTAGAGCTTGACGGGGAAAGCCGGCGAACGTGGCGAGAAAGGAAGGGAAGAAAGCGTTTTCATTTTTTTTTTTCCACCTAGCGCGAGACTCTTTTTTTTTCTTAGCGATCCTAGGGCGATCA	0.14	0.1	1.09
12	GGGGACCAGGTGCCGTAAGTTTTGTCGGCTAGAGCTTGACGGGGAAAGCCGGCGAACGTGGCGAGAAAGGAAGGGAAGAAAGCGTTTTCATTTTTTTTTTTCCACCTCCTGGATGACTCTTTTTTTTTCTTAGCGATCCTAGGGCGATCA	0.21	0.1	1.21
13	GGGGACCAGGTGCCGTAAGTGCATTGAGATAGAGCTTGACGGGGAAAGCCGGCGAACGTGGCGAGAAAGGAAGGGAAGAAAGCGTTTTCATTTTTTTTTTTCCTATTAGCGGATGACTCTTTTTTTTTCTTAGCGATCCTAGGGCGATCA	NaN	NaN	0.97
14	GGGGACCAGGTGCCGTAAGGGTGTAGAGCTAGAGCTTGACGGGGAAAGCCGGCGAACGTGGCGAGAAAGGAAGGGAAGAAAGCGTTTTCATTTTTTTTTCATCACCTAGCGGATGACTCTTTTTTTTTCTTAGCGATCCTAGGGCGATCA	0.36	1.39	1.02
15	GGGGACCAGGTGCCGTAAGGCACGTAGTCTAGAGCTTGACGGGGAAAGCCGGCGAACGTGGCGAGAAAGGAAGGGAAGAAAGCGTTTTCATTTTTAGATTTCCACCTAGCGGATGACTCTTTTTTTTTCTTAGCGATCCTAGGGCGATCA	NaN	NaN	1.12
16	GGGGACCAGGTGCCGTAAGACGAGCATTTTAGAGCTTGACGGGGAAAGCCGGCGAACGTGGCGAGAAAGGAAGGGAAGAAAGCGTTTTCATAACTTTTTTTCCACCTAGCGGATGACTCTTTTTTTTTCTTAGCGATCCTAGGGCGATCA	0.17	0.11	0.83
17	GGGGACCAGGTGCCGTAAGTTGTCGTAATTAGAGCTTGACGGGGAAAGCCGGCGAACGTGGCGAGAAAGGAAGGGAAGAAAGCGTTTAACTTTTTTTTTTTCCACCTAGCGGATGACTCTTTTTTTTTCTTAGCGATCCTAGGGCGATCA	0.37	0.1	0.96
18	GGGGACCAGGTGCCGTAAGATAGGTCGAATAGAGCTTGACGGGGAAAGCCGGCGAACGTGGCGAGAAAGGAAGGGAAGAAAGCAAGTTCATTTTTTTTTTTCCACCTAGCGGATGACTCTTTTTTTTTCTTAGCGATCCTAGGGCGATCA	0.16	0.17	1
19	GGGGACCAGGTGCCGTAAGGGCCTACCGCTAGAGCTTGACGGGGAAAGCCGGCGAACGTGGCGAGAAAGGAAGGGAAGATCCCGTTTTCATTTTTTTTTTTCCACCTAGCGGATGACTCTTTTTTTTTCTTAGCGATCCTAGGGCGATCA	NaN	0.19	1.08
20	GGGGACCAGGTGCCGTAAGCACTGGTTGTTAGAGCTTGACGGGGAAAGCCGGCGAACGTGGCGAGAAAGGAAGGGCTCAAAGCGTTTTCATTTTTTTTTTTCCACCTAGCGGATGACTCTTTTTTTTTCTTAGCGATCCTAGGGCGATCA	0.19	0.11	1.21
21	GGGGACCAGGTGCCGTAAGTAACAGAGTTTAGAGCTTGACGGGGAAAGCCGGCGAACGTGGCGAGAAAGGATATGAAGAAAGCGTTTTCATTTTTTTTTTTCCACCTAGCGGATGACTCTTTTTTTTTCTTAGCGATCCTAGGGCGATCA	NaN	NaN	0.75
22	GGGGACCAGGTGCCGTAAGGGGTCCACTATAGAGCTTGACGGGGAAAGCCGGCGAACGTGGCGAGAATTAAAGGGAAGAAAGCGTTTTCATTTTTTTTTTTCCACCTAGCGGATGACTCTTTTTTTTTCTTAGCGATCCTAGGGCGATCA	0.18	0.25	0.81
23	GGGGACCAGGTGCCGTAAGACACAGACTGTAGAGCTTGACGGGGAAAGCCGGCGAACGTGGCGTTGAAGGAAGGGAAGAAAGCGTTTTCATTTTTTTTTTTCCACCTAGCGGATGACTCTTTTTTTTTCTTAGCGATCCTAGGGCGATCA	0.21	0.2	0.98
24	GGGGACCAGGTGCCGTAAGAATCGTCAGATAGAGCTTGACGGGGAAAGCCGGCGAACGTATTGAGAAAGGAAGGGAAGAAAGCGTTTTCATTTTTTTTTTTCCACCTAGCGGATGACTCTTTTTTTTTCTTAGCGATCCTAGGGCGATCA	0.52	0.77	0.76
25	GGGGACCAGGTGCCGTAAGCCGGTGCCAATAGAGCTTGACGGGGAAAGCCGGCGATTATGGCGAGAAAGGAAGGGAAGAAAGCGTTTTCATTTTTTTTTTTCCACCTAGCGGATGACTCTTTTTTTTTCTTAGCGATCCTAGGGCGATCA	0.22	0.13	0.89
26	GGGGACCAGGTGCCGTAAGCTGCCCACTCTAGAGCTTGACGGGGAAAGCCGATCAACGTGGCGAGAAAGGAAGGGAAGAAAGCGTTTTCATTTTTTTTTTTCCACCTAGCGGATGACTCTTTTTTTTTCTTAGCGATCCTAGGGCGATCA	0.2	0.06	1
27	GGGGACCAGGTGCCGTAAGAAGTTTTAACTAGAGCTTGACGGGGAAAAATGGCGAACGTGGCGAGAAAGGAAGGGAAGAAAGCGTTTTCATTTTTTTTTTTCCACCTAGCGGATGACTCTTTTTTTTTCTTAGCGATCCTAGGGCGATCA	NaN	0.25	0.79
28	GGGGACCAGGTGCCGTAAGCTTCGTCTGATAGAGCTTGACGGGCGGAGCCGGCGAACGTGGCGAGAAAGGAAGGGAAGAAAGCGTTTTCATTTTTTTTTTTCCACCTAGCGGATGACTCTTTTTTTTTCTTAGCGATCCTAGGGCGATCA	0.29	0.09	1.03
29	GGGGACCAGGTGCCGTAAGTAGTGACCGCTAGAGCTTGATCAGGAAAGCCGGCGAACGTGGCGAGAAAGGAAGGGAAGAAAGCGTTTTCATTTTTTTTTTTCCACCTAGCGGATGACTCTTTTTTTTTCTTAGCGATCCTAGGGCGATCA	NaN	NaN	0.89
30	GGGGACCAGGTGCCGTAAGAACGAAGACGTAGAGCGATACGGGGAAAGCCGGCGAACGTGGCGAGAAAGGAAGGGAAGAAAGCGTTTTCATTTTTTTTTTTCCACCTAGCGGATGACTCTTTTTTTTTCTTAGCGATCCTAGGGCGATCA	NaN	NaN	0.95
31	GGGGACCAGGTGCCGTAAGATCCACCATATATCACTTGACGGGGAAAGCCGGCGAACGTGGCGAGAAAGGAAGGGAAGAAAGCGTTTTCATTTTTTTTTTTCCACCTAGCGGATGACTCTTTTTTTTTCTTAGCGATCCTAGGGCGATCA	0.23	0.25	0.83
32	GGGGACCAGGTGCCGTAAGTCGCCTGCGGCGGATTAGAAGCCGCCGAGCGGGCGACAGCCCTCCGACGGAAGACTCTCCTCCGTGCGTCCTCGTCTTCGAAACGCAGATGTGCCTCGCGCCGCACTGCTAGAGCGATCCTAGGGCGATCA	0.15	4.21	1.19
33	GGGGACCAGGTGCCGTAAGCATTGTCGTCCGGATTAGAAGCCGCCGAGCGGGCGACAGCCCTCCGACGGAAGACTCTCCTCCGTGCGTCCTCGTCTTCGAAACGCAGATGTGCCTCGCGCCGCACTGGGACGGCGATCCTAGGGCGATCA	0.21	4.05	1.09
34	GGGGACCAGGTGCCGTAAGGAGCCGACGCCGGATTAGAAGCCGCCGAGCGGGCGACAGCCCTCCGACGGAAGACTCTCCTCCGTGCGTCCTCGTCTTCGAAACGCAGATGTGCCTCGCGCCGCCGGGCTCCGGCGATCCTAGGGCGATCA	0.31	4.58	1
35	GGGGACCAGGTGCCGTAAGGGCGGATCTCCGGATTAGAAGCCGCCGAGCGGGCGACAGCCCTCCGACGGAAGACTCTCCTCCGTGCGTCCTCGTCTTCGAAACGCAGATGTGCCTCGCGGAACACTGCTCCGGCGATCCTAGGGCGATCA	0.12	4.16	1.25
36	GGGGACCAGGTGCCGTAAGACTAGTAGACCGGATTAGAAGCCGCCGAGCGGGCGACAGCCCTCCGACGGAAGACTCTCCTCCGTGCGTCCTCGTCTTCGAAACGCAGATGTGCCTGAGGCCGCACTGCTCCGGCGATCCTAGGGCGATCA	0.26	4.4	1.14
37	GGGGACCAGGTGCCGTAAGCGGCGACTGACGGATTAGAAGCCGCCGAGCGGGCGACAGCCCTCCGACGGAAGACTCTCCTCCGTGCGTCCTCGTCTTCGAAACGCAGATGTAATTCGCGCCGCACTGCTCCGGCGATCCTAGGGCGATCA	0.27	4.49	1.19
38	GGGGACCAGGTGCCGTAAGGGGCGGCTAGCGGATTAGAAGCCGCCGAGCGGGCGACAGCCCTCCGACGGAAGACTCTCCTCCGTGCGTCCTCGTCTTCGAAACGCAGTCCTGCCTCGCGCCGCACTGCTCCGGCGATCCTAGGGCGATCA	0.19	4.07	1.32
39	GGGGACCAGGTGCCGTAAGAACCGTTAGGCGGATTAGAAGCCGCCGAGCGGGCGACAGCCCTCCGACGGAAGACTCTCCTCCGTGCGTCCTCGTCTTCGAAACCTCGATGTGCCTCGCGCCGCACTGCTCCGGCGATCCTAGGGCGATCA	0.22	4.13	1.07
40	GGGGACCAGGTGCCGTAAGTTTGAGGCAGCGGATTAGAAGCCGCCGAGCGGGCGACAGCCCTCCGACGGAAGACTCTCCTCCGTGCGTCCTCGTCTTCGCCTCGCAGATGTGCCTCGCGCCGCACTGCTCCGGCGATCCTAGGGCGATCA	0.27	4.42	1.09
41	GGGGACCAGGTGCCGTAAGGTTTCGTCATCGGATTAGAAGCCGCCGAGCGGGCGACAGCCCTCCGACGGAAGACTCTCCTCCGTGCGTCCTCGTCACTGAAACGCAGATGTGCCTCGCGCCGCACTGCTCCGGCGATCCTAGGGCGATCA	0.3	4	1.38
42	GGGGACCAGGTGCCGTAAGTATGAACCGGCGGATTAGAAGCCGCCGAGCGGGCGACAGCCCTCCGACGGAAGACTCTCCTCCGTGCGTCCTACGCTTCGAAACGCAGATGTGCCTCGCGCCGCACTGCTCCGGCGATCCTAGGGCGATCA	0.24	3.99	1.15
43	GGGGACCAGGTGCCGTAAGGGAGCAGGTCCGGATTAGAAGCCGCCGAGCGGGCGACAGCCCTCCGACGGAAGACTCTCCTCCGTGCGGTGTCGTCTTCGAAACGCAGATGTGCCTCGCGCCGCACTGCTCCGGCGATCCTAGGGCGATCA	0.23	4.01	1.14
44	GGGGACCAGGTGCCGTAAGCAATCTTGATCGGATTAGAAGCCGCCGAGCGGGCGACAGCCCTCCGACGGAAGACTCTCCTCCGAAGGTCCTCGTCTTCGAAACGCAGATGTGCCTCGCGCCGCACTGCTCCGGCGATCCTAGGGCGATCA	0.31	6.5	1.16
45	GGGGACCAGGTGCCGTAAGCGGGCGTCTTCGGATTAGAAGCCGCCGAGCGGGCGACAGCCCTCCGACGGAAGACTCTCCGGTGTGCGTCCTCGTCTTCGAAACGCAGATGTGCCTCGCGCCGCACTGCTCCGGCGATCCTAGGGCGATCA	0.13	3.36	1.16
46	GGGGACCAGGTGCCGTAAGGGCCGTCTGTCGGATTAGAAGCCGCCGAGCGGGCGACAGCCCTCCGACGGAAGACTAATCTCCGTGCGTCCTCGTCTTCGAAACGCAGATGTGCCTCGCGCCGCACTGCTCCGGCGATCCTAGGGCGATCA	0.12	3.66	1.1
47	GGGGACCAGGTGCCGTAAGATTTGGGACCCGGATTAGAAGCCGCCGAGCGGGCGACAGCCCTCCGACGGAAAGGTCTCCTCCGTGCGTCCTCGTCTTCGAAACGCAGATGTGCCTCGCGCCGCACTGCTCCGGCGATCCTAGGGCGATCA	0.24	3.43	1.15
48	GGGGACCAGGTGCCGTAAGCGACGCTTTTCGGATTAGAAGCCGCCGAGCGGGCGACAGCCCTCCGACCTTAGACTCTCCTCCGTGCGTCCTCGTCTTCGAAACGCAGATGTGCCTCGCGCCGCACTGCTCCGGCGATCCTAGGGCGATCA	0.24	2.78	1.13
49	GGGGACCAGGTGCCGTAAGCTAGAACGATCGGATTAGAAGCCGCCGAGCGGGCGACAGCCCTCAACCGGAAGACTCTCCTCCGTGCGTCCTCGTCTTCGAAACGCAGATGTGCCTCGCGCCGCACTGCTCCGGCGATCCTAGGGCGATCA	0.24	3.78	1.22
50	GGGGACCAGGTGCCGTAAGTACAGACAACCGGATTAGAAGCCGCCGAGCGGGCGACAGCTGACCGACGGAAGACTCTCCTCCGTGCGTCCTCGTCTTCGAAACGCAGATGTGCCTCGCGCCGCACTGCTCCGGCGATCCTAGGGCGATCA	0.2	3.29	1.17
51	GGGGACCAGGTGCCGTAAGCGTCGTTTCTCGGATTAGAAGCCGCCGAGCGGGCGATTACCCTCCGACGGAAGACTCTCCTCCGTGCGTCCTCGTCTTCGAAACGCAGATGTGCCTCGCGCCGCACTGCTCCGGCGATCCTAGGGCGATCA	0.3	2.66	1.19
52	GGGGACCAGGTGCCGTAAGCGCCGCATATCGGATTAGAAGCCGCCGAGCGGTGTACAGCCCTCCGACGGAAGACTCTCCTCCGTGCGTCCTCGTCTTCGAAACGCAGATGTGCCTCGCGCCGCACTGCTCCGGCGATCCTAGGGCGATCA	0.14	2.63	1.08
53	GGGGACCAGGTGCCGTAAGCCAAAAGATTCGGATTAGAAGCCGCCGATTCGGCGACAGCCCTCCGACGGAAGACTCTCCTCCGTGCGTCCTCGTCTTCGAAACGCAGATGTGCCTCGCGCCGCACTGCTCCGGCGATCCTAGGGCGATCA	0.17	2.39	1.24
54	GGGGACCAGGTGCCGTAAGGGTTCAACGGCGGATTAGAAGCCGGGTAGCGGGCGACAGCCCTCCGACGGAAGACTCTCCTCCGTGCGTCCTCGTCTTCGAAACGCAGATGTGCCTCGCGCCGCACTGCTCCGGCGATCCTAGGGCGATCA	0.23	4.57	1.17
55	GGGGACCAGGTGCCGTAAGTTCAGCTAATCGGATTAGAACGAGCCGAGCGGGCGACAGCCCTCCGACGGAAGACTCTCCTCCGTGCGTCCTCGTCTTCGAAACGCAGATGTGCCTCGCGCCGCACTGCTCCGGCGATCCTAGGGCGATCA	0.19	4.73	1.17
56	GGGGACCAGGTGCCGTAAGTGACGACCAGCGGATTCATAGCCGCCGAGCGGGCGACAGCCCTCCGACGGAAGACTCTCCTCCGTGCGTCCTCGTCTTCGAAACGCAGATGTGCCTCGCGCCGCACTGCTCCGGCGATCCTAGGGCGATCA	0.23	4.07	1.14
57	GGGGACCAGGTGCCGTAAGAGAGTCAGTTCGTGGTAGAAGCCGCCGAGCGGGCGACAGCCCTCCGACGGAAGACTCTCCTCCGTGCGTCCTCGTCTTCGAAACGCAGATGTGCCTCGCGCCGCACTGCTCCGGCGATCCTAGGGCGATCA	0.19	4.46	1.26
58	GGGGACCAGGTGCCGTAAGGAGATCGTCGGTTCTGGCCCGTCGGGTTTTCTGACAAATTGTCCTTTAGGGATTTTTCGGTTTGGCTCGGGTTGGCAAAGTCGGCTGGCAACAAACCAGGACATATATAATACGCGATCCTAGGGCGATCA	0.13	0.26	0.93
59	GGGGACCAGGTGCCGTAAGGAGCCGTCCAGTTCTGGCCCGTCGGGTTTTCTGACAAATTGTCCTTTAGGGATTTTTCGGTTTGGCTCGGGTTGGCAAAGTCGGCTGGCAACAAACCAGGACATATATGCGGGGCGATCCTAGGGCGATCA	0.12	0.11	0.83
60	GGGGACCAGGTGCCGTAAGATTGACAATGGTTCTGGCCCGTCGGGTTTTCTGACAAATTGTCCTTTAGGGATTTTTCGGTTTGGCTCGGGTTGGCAAAGTCGGCTGGCAACAAACCAGGACATTCCTAAAGGGCGATCCTAGGGCGATCA	0.16	0.07	0.86
61	GGGGACCAGGTGCCGTAAGAGACAGGTAGGTTCTGGCCCGTCGGGTTTTCTGACAAATTGTCCTTTAGGGATTTTTCGGTTTGGCTCGGGTTGGCAAAGTCGGCTGGCAACAAACGGCGACATATATAAAGGGCGATCCTAGGGCGATCA	0.12	0.06	0.95
62	GGGGACCAGGTGCCGTAAGAGGCATGACCGTTCTGGCCCGTCGGGTTTTCTGACAAATTGTCCTTTAGGGATTTTTCGGTTTGGCTCGGGTTGGCAAAGTCGGCTGGCAACCCTCCAGGACATATATAAAGGGCGATCCTAGGGCGATCA	0.1	0.1	0.9
63	GGGGACCAGGTGCCGTAAGGTGCGAGATTGTTCTGGCCCGTCGGGTTTTCTGACAAATTGTCCTTTAGGGATTTTTCGGTTTGGCTCGGGTTGGCAAAGTCGGCTGGTTCCAAACCAGGACATATATAAAGGGCGATCCTAGGGCGATCA	0.11	0.1	0.92
64	GGGGACCAGGTGCCGTAAGTCTGTGCATTGTTCTGGCCCGTCGGGTTTTCTGACAAATTGTCCTTTAGGGATTTTTCGGTTTGGCTCGGGTTGGCAAAGTCGGAACGCAACAAACCAGGACATATATAAAGGGCGATCCTAGGGCGATCA	0.07	0.07	0.9
65	GGGGACCAGGTGCCGTAAGCTTTCTTCAGGTTCTGGCCCGTCGGGTTTTCTGACAAATTGTCCTTTAGGGATTTTTCGGTTTGGCTCGGGTTGGCAAAGCTAGCTGGCAACAAACCAGGACATATATAAAGGGCGATCCTAGGGCGATCA	0.14	0.08	1
66	GGGGACCAGGTGCCGTAAGTGTCTTGCGGGTTCTGGCCCGTCGGGTTTTCTGACAAATTGTCCTTTAGGGATTTTTCGGTTTGGCTCGGGTTGGCCGCGTCGGCTGGCAACAAACCAGGACATATATAAAGGGCGATCCTAGGGCGATCA	0.14	0.1	0.91
67	GGGGACCAGGTGCCGTAAGGTCCGCCTGCGTTCTGGCCCGTCGGGTTTTCTGACAAATTGTCCTTTAGGGATTTTTCGGTTTGGCTCGGGTCTTCAAAGTCGGCTGGCAACAAACCAGGACATATATAAAGGGCGATCCTAGGGCGATCA	0.13	0.12	1.01
68	GGGGACCAGGTGCCGTAAGTCTATCGATAGTTCTGGCCCGTCGGGTTTTCTGACAAATTGTCCTTTAGGGATTTTTCGGTTTGGCTCCTTTTGGCAAAGTCGGCTGGCAACAAACCAGGACATATATAAAGGGCGATCCTAGGGCGATCA	0.14	0.1	0.83
69	GGGGACCAGGTGCCGTAAGGACCCTACCTGTTCTGGCCCGTCGGGTTTTCTGACAAATTGTCCTTTAGGGATTTTTCGGTTTGCGCCGGGTTGGCAAAGTCGGCTGGCAACAAACCAGGACATATATAAAGGGCGATCCTAGGGCGATCA	0.12	0.1	0.94
70	GGGGACCAGGTGCCGTAAGAAAGCTTTGAGTTCTGGCCCGTCGGGTTTTCTGACAAATTGTCCTTTAGGGATTTTTCGGAGAGGCTCGGGTTGGCAAAGTCGGCTGGCAACAAACCAGGACATATATAAAGGGCGATCCTAGGGCGATCA	0.18	0.13	1.01
71	GGGGACCAGGTGCCGTAAGGTGATCATACGTTCTGGCCCGTCGGGTTTTCTGACAAATTGTCCTTTAGGGATTTTCGCGTTTGGCTCGGGTTGGCAAAGTCGGCTGGCAACAAACCAGGACATATATAAAGGGCGATCCTAGGGCGATCA	0.11	0.12	0.98
72	GGGGACCAGGTGCCGTAAGACAAATCCGGGTTCTGGCCCGTCGGGTTTTCTGACAAATTGTCCTTTAGGGAGGCTTCGGTTTGGCTCGGGTTGGCAAAGTCGGCTGGCAACAAACCAGGACATATATAAAGGGCGATCCTAGGGCGATCA	0.11	0.08	0.85
73	GGGGACCAGGTGCCGTAAGTCACAGCCTAGTTCTGGCCCGTCGGGTTTTCTGACAAATTGTCCTTTATCTATTTTTCGGTTTGGCTCGGGTTGGCAAAGTCGGCTGGCAACAAACCAGGACATATATAAAGGGCGATCCTAGGGCGATCA	0.13	0.07	0.93
74	GGGGACCAGGTGCCGTAAGTCGTCGTTCAGTTCTGGCCCGTCGGGTTTTCTGACAAATTGTCCCCAAGGGATTTTTCGGTTTGGCTCGGGTTGGCAAAGTCGGCTGGCAACAAACCAGGACATATATAAAGGGCGATCCTAGGGCGATCA	0.13	0.11	0.92
75	GGGGACCAGGTGCCGTAAGTGCCTGGGCGGTTCTGGCCCGTCGGGTTTTCTGACAAATTCAACTTTAGGGATTTTTCGGTTTGGCTCGGGTTGGCAAAGTCGGCTGGCAACAAACCAGGACATATATAAAGGGCGATCCTAGGGCGATCA	0.12	0.07	0.73
76	GGGGACCAGGTGCCGTAAGTAGGGACTGAGTTCTGGCCCGTCGGGTTTTCTGACAGGATGTCCTTTAGGGATTTTTCGGTTTGGCTCGGGTTGGCAAAGTCGGCTGGCAACAAACCAGGACATATATAAAGGGCGATCCTAGGGCGATCA	0.1	0.08	0.94
77	GGGGACCAGGTGCCGTAAGCAGGTCGCCCGTTCTGGCCCGTCGGGTTTTCTCTTAAATTGTCCTTTAGGGATTTTTCGGTTTGGCTCGGGTTGGCAAAGTCGGCTGGCAACAAACCAGGACATATATAAAGGGCGATCCTAGGGCGATCA	0.09	0.07	0.94
78	GGGGACCAGGTGCCGTAAGGTACTGGGCCGTTCTGGCCCGTCGGGTTAGGTGACAAATTGTCCTTTAGGGATTTTTCGGTTTGGCTCGGGTTGGCAAAGTCGGCTGGCAACAAACCAGGACATATATAAAGGGCGATCCTAGGGCGATCA	0.11	0.09	1.09
79	GGGGACCAGGTGCCGTAAGCCCTAAATACGTTCTGGCCCGTCGTTATTTCTGACAAATTGTCCTTTAGGGATTTTTCGGTTTGGCTCGGGTTGGCAAAGTCGGCTGGCAACAAACCAGGACATATATAAAGGGCGATCCTAGGGCGATCA	0.12	0.07	0.85
80	GGGGACCAGGTGCCGTAAGGTGCTGAACTGTTCTGGCCCCCTGGGTTTTCTGACAAATTGTCCTTTAGGGATTTTTCGGTTTGGCTCGGGTTGGCAAAGTCGGCTGGCAACAAACCAGGACATATATAAAGGGCGATCCTAGGGCGATCA	0.11	0.05	0.95
81	GGGGACCAGGTGCCGTAAGCCGACACCTTGTTCTGAAGCGTCGGGTTTTCTGACAAATTGTCCTTTAGGGATTTTTCGGTTTGGCTCGGGTTGGCAAAGTCGGCTGGCAACAAACCAGGACATATATAAAGGGCGATCCTAGGGCGATCA	0.16	0.06	1.04
82	GGGGACCAGGTGCCGTAAGCACTACCGAAGTGTGGGCCCGTCGGGTTTTCTGACAAATTGTCCTTTAGGGATTTTTCGGTTTGGCTCGGGTTGGCAAAGTCGGCTGGCAACAAACCAGGACATATATAAAGGGCGATCCTAGGGCGATCA	0.07	0.08	0.79
83	GGGGACCAGGTGCCGTAAGAGAGGAGCCGCACAACTGTTTTCCATTTTTTTTTTTTTTTTTTCAGTGATCATCGTCCATGAAAAAAATTTTTCATTTGTCTCTTTCGTGCTTCCTGGATATATAAAATAAAGGCGATCCTAGGGCGATCA	NaN	NaN	0.68
84	GGGGACCAGGTGCCGTAAGATGCGCCCATCACAACTGTTTTCCATTTTTTTTTTTTTTTTTTCAGTGATCATCGTCCATGAAAAAAATTTTTCATTTGTCTCTTTCGTGCTTCCTGGATATATAAAAGCGGAGCGATCCTAGGGCGATCA	NaN	0.06	0.5
85	GGGGACCAGGTGCCGTAAGACGATACTTTCACAACTGTTTTCCATTTTTTTTTTTTTTTTTTCAGTGATCATCGTCCATGAAAAAAATTTTTCATTTGTCTCTTTCGTGCTTCCTGGATATATTGGATACGAGCGATCCTAGGGCGATCA	0.16	0.16	0.5
86	GGGGACCAGGTGCCGTAAGTAAAGTGACCCACAACTGTTTTCCATTTTTTTTTTTTTTTTTTCAGTGATCATCGTCCATGAAAAAAATTTTTCATTTGTCTCTTTCGTGCTTCCTGGATTGGTAAAATACGAGCGATCCTAGGGCGATCA	0.08	0.11	0.52
87	GGGGACCAGGTGCCGTAAGCCATGAAGATCACAACTGTTTTCCATTTTTTTTTTTTTTTTTTCAGTGATCATCGTCCATGAAAAAAATTTTTCATTTGTCTCTTTCGTGCTTCCTCAGTATATAAAATACGAGCGATCCTAGGGCGATCA	0.08	0.14	0.46
88	GGGGACCAGGTGCCGTAAGCTTGTCCCTGCACAACTGTTTTCCATTTTTTTTTTTTTTTTTTCAGTGATCATCGTCCATGAAAAAAATTTTTCATTTGTCTCTTTCGTGCTAAGTGGATATATAAAATACGAGCGATCCTAGGGCGATCA	0.14	0.15	0.59
89	GGGGACCAGGTGCCGTAAGGAGCTTTCTACACAACTGTTTTCCATTTTTTTTTTTTTTTTTTCAGTGATCATCGTCCATGAAAAAAATTTTTCATTTGTCTCTTTCGGAGTTCCTGGATATATAAAATACGAGCGATCCTAGGGCGATCA	0.12	0.24	0.5
90	GGGGACCAGGTGCCGTAAGGGTTAGAAATCACAACTGTTTTCCATTTTTTTTTTTTTTTTTTCAGTGATCATCGTCCATGAAAAAAATTTTTCATTTGTCTCTCAAGTGCTTCCTGGATATATAAAATACGAGCGATCCTAGGGCGATCA	0.11	0.16	0.38
91	GGGGACCAGGTGCCGTAAGGAAATGGTGCCACAACTGTTTTCCATTTTTTTTTTTTTTTTTTCAGTGATCATCGTCCATGAAAAAAATTTTTCATTTGTTGATTTCGTGCTTCCTGGATATATAAAATACGAGCGATCCTAGGGCGATCA	0.16	0.16	0.49
92	GGGGACCAGGTGCCGTAAGCAGGTGTTCACACAACTGTTTTCCATTTTTTTTTTTTTTTTTTCAGTGATCATCGTCCATGAAAAAAATTTTTCATACTTCTCTTTCGTGCTTCCTGGATATATAAAATACGAGCGATCCTAGGGCGATCA	0.15	0.1	0.61
93	GGGGACCAGGTGCCGTAAGAACAGATCAACACAACTGTTTTCCATTTTTTTTTTTTTTTTTTCAGTGATCATCGTCCATGAAAAAAATTTTCGCTTTGTCTCTTTCGTGCTTCCTGGATATATAAAATACGAGCGATCCTAGGGCGATCA	0.39	0.17	0.63
94	GGGGACCAGGTGCCGTAAGCATTACGTTTCACAACTGTTTTCCATTTTTTTTTTTTTTTTTTCAGTGATCATCGTCCATGAAAAAAAACGTTCATTTGTCTCTTTCGTGCTTCCTGGATATATAAAATACGAGCGATCCTAGGGCGATCA	0.07	0.17	0.47
95	GGGGACCAGGTGCCGTAAGGCTTCTATGACACAACTGTTTTCCATTTTTTTTTTTTTTTTTTCAGTGATCATCGTCCATGAAAGGTATTTTTCATTTGTCTCTTTCGTGCTTCCTGGATATATAAAATACGAGCGATCCTAGGGCGATCA	0.13	0.16	0.67
96	GGGGACCAGGTGCCGTAAGCAGCTCTGAGCACAACTGTTTTCCATTTTTTTTTTTTTTTTTTCAGTGATCATCGTCCATAGGAAAAATTTTTCATTTGTCTCTTTCGTGCTTCCTGGATATATAAAATACGAGCGATCCTAGGGCGATCA	0.06	0.24	0.56
97	GGGGACCAGGTGCCGTAAGTCGGTACTCACACAACTGTTTTCCATTTTTTTTTTTTTTTTTTCAGTGATCATCGTGAGTGAAAAAAATTTTTCATTTGTCTCTTTCGTGCTTCCTGGATATATAAAATACGAGCGATCCTAGGGCGATCA	0.07	0.15	0.68
98	GGGGACCAGGTGCCGTAAGTAGTCGACAGCACAACTGTTTTCCATTTTTTTTTTTTTTTTTTCAGTGATCACTTTCCATGAAAAAAATTTTTCATTTGTCTCTTTCGTGCTTCCTGGATATATAAAATACGAGCGATCCTAGGGCGATCA	0.11	0.07	0.48
99	GGGGACCAGGTGCCGTAAGGCAATTTCGCCACAACTGTTTTCCATTTTTTTTTTTTTTTTTTCAGTGTGAATCGTCCATGAAAAAAATTTTTCATTTGTCTCTTTCGTGCTTCCTGGATATATAAAATACGAGCGATCCTAGGGCGATCA	0.15	0.16	0.53
100	GGGGACCAGGTGCCGTAAGAGCCGATTGACACAACTGTTTTCCATTTTTTTTTTTTTTTTTTCGAAGATCATCGTCCATGAAAAAAATTTTTCATTTGTCTCTTTCGTGCTTCCTGGATATATAAAATACGAGCGATCCTAGGGCGATCA	0.13	0.13	0.51
101	GGGGACCAGGTGCCGTAAGTTGAGTCGAGCACAACTGTTTTCCATTTTTTTTTTTTTTTAGGCAGTGATCATCGTCCATGAAAAAAATTTTTCATTTGTCTCTTTCGTGCTTCCTGGATATATAAAATACGAGCGATCCTAGGGCGATCA	0.12	0.17	0.67
102	GGGGACCAGGTGCCGTAAGGACACCTCGGCACAACTGTTTTCCATTTTTTTTTTTCAGTTTTCAGTGATCATCGTCCATGAAAAAAATTTTTCATTTGTCTCTTTCGTGCTTCCTGGATATATAAAATACGAGCGATCCTAGGGCGATCA	0.19	0.12	0.43
103	GGGGACCAGGTGCCGTAAGTTTAACCAACCACAACTGTTTTCCATTTTTTTCGCTTTTTTTTCAGTGATCATCGTCCATGAAAAAAATTTTTCATTTGTCTCTTTCGTGCTTCCTGGATATATAAAATACGAGCGATCCTAGGGCGATCA	0.09	0.21	0.32
104	GGGGACCAGGTGCCGTAAGTAACAGCTAGCACAACTGTTTTCCATTTGACTTTTTTTTTTTTCAGTGATCATCGTCCATGAAAAAAATTTTTCATTTGTCTCTTTCGTGCTTCCTGGATATATAAAATACGAGCGATCCTAGGGCGATCA	0.08	0.15	0.53
105	GGGGACCAGGTGCCGTAAGGCGTCTCTGCCACAACTGTTTTCCGCGTTTTTTTTTTTTTTTTCAGTGATCATCGTCCATGAAAAAAATTTTTCATTTGTCTCTTTCGTGCTTCCTGGATATATAAAATACGAGCGATCCTAGGGCGATCA	0.13	0.18	0.59
106	GGGGACCAGGTGCCGTAAGTCCGGCAAAGCACAACTGTTGGTCATTTTTTTTTTTTTTTTTTCAGTGATCATCGTCCATGAAAAAAATTTTTCATTTGTCTCTTTCGTGCTTCCTGGATATATAAAATACGAGCGATCCTAGGGCGATCA	0.05	0.45	0.54
107	GGGGACCAGGTGCCGTAAGATGTTGTATCCACAACACCTTTCCATTTTTTTTTTTTTTTTTTCAGTGATCATCGTCCATGAAAAAAATTTTTCATTTGTCTCTTTCGTGCTTCCTGGATATATAAAATACGAGCGATCCTAGGGCGATCA	0.2	0.26	0.51
108	GGGGACCAGGTGCCGTAAGCTCATTGTGGCAGCTCTGTTTTCCATTTTTTTTTTTTTTTTTTCAGTGATCATCGTCCATGAAAAAAATTTTTCATTTGTCTCTTTCGTGCTTCCTGGATATATAAAATACGAGCGATCCTAGGGCGATCA	0.12	0.16	0.47
109	GGGGACCAGGTGCCGTAAGCACCGACACGGCACTAAATCGGAACCCTAAAGGGAGCCCCCGATTTAGAGCTTGACGGGGAAAGCCGGCGAACGTGGCGAGAAAGGAAGGGAAGAAAGCGCCACCTAGCGACGGCGATCCTAGGGCGATCA	0.2	0.13	1.1
110	GGGGACCAGGTGCCGTAAGATACGCTTGAGCACTAAATCGGAACCCTAAAGGGAGCCCCCGATTTAGAGCTTGACGGGGAAAGCCGGCGAACGTGGCGAGAAAGGAAGGGAAGAAAGCGCCACCTAGACTAAGCGATCCTAGGGCGATCA	0.47	0.11	1.04
111	GGGGACCAGGTGCCGTAAGCTTTGAAAACGCACTAAATCGGAACCCTAAAGGGAGCCCCCGATTTAGAGCTTGACGGGGAAAGCCGGCGAACGTGGCGAGAAAGGAAGGGAAGAAAGCGCCACGCGGCGGAAGCGATCCTAGGGCGATCA	NaN	0.08	0.87
112	GGGGACCAGGTGCCGTAAGGAGCAAATTTGCACTAAATCGGAACCCTAAAGGGAGCCCCCGATTTAGAGCTTGACGGGGAAAGCCGGCGAACGTGGCGAGAAAGGAAGGGAAGAAAGCGTTCCCTAGCGGAAGCGATCCTAGGGCGATCA	NaN	0.12	1.32
113	GGGGACCAGGTGCCGTAAGATCCATAGAGGCACTAAATCGGAACCCTAAAGGGAGCCCCCGATTTAGAGCTTGACGGGGAAAGCCGGCGAACGTGGCGAGAAAGGAAGGGAAGAAGTTGCCACCTAGCGGAAGCGATCCTAGGGCGATCA	NaN	0.06	1.08
114	GGGGACCAGGTGCCGTAAGGCGAGTCCACGCACTAAATCGGAACCCTAAAGGGAGCCCCCGATTTAGAGCTTGACGGGGAAAGCCGGCGAACGTGGCGAGAAAGGAAGGGAGACAAGCGCCACCTAGCGGAAGCGATCCTAGGGCGATCA	NaN	0.08	1.1
115	GGGGACCAGGTGCCGTAAGCCAGAATGACGCACTAAATCGGAACCCTAAAGGGAGCCCCCGATTTAGAGCTTGACGGGGAAAGCCGGCGAACGTGGCGAGAAAGGAACACAAGAAAGCGCCACCTAGCGGAAGCGATCCTAGGGCGATCA	0.39	0.1	1.02
116	GGGGACCAGGTGCCGTAAGCATGACCTTAGCACTAAATCGGAACCCTAAAGGGAGCCCCCGATTTAGAGCTTGACGGGGAAAGCCGGCGAACGTGGCGAGAAACTCAGGGAAGAAAGCGCCACCTAGCGGAAGCGATCCTAGGGCGATCA	0.26	0.09	0.85
117	GGGGACCAGGTGCCGTAAGAGGGTTTGATGCACTAAATCGGAACCCTAAAGGGAGCCCCCGATTTAGAGCTTGACGGGGAAAGCCGGCGAACGTGGCGAATTAGGAAGGGAAGAAAGCGCCACCTAGCGGAAGCGATCCTAGGGCGATCA	NaN	0.1	1.1
118	GGGGACCAGGTGCCGTAAGAAGGGATCTGGCACTAAATCGGAACCCTAAAGGGAGCCCCCGATTTAGAGCTTGACGGGGAAAGCCGGCGAACGTGTGTAGAAAGGAAGGGAAGAAAGCGCCACCTAGCGGAAGCGATCCTAGGGCGATCA	NaN	0.17	0.98
119	GGGGACCAGGTGCCGTAAGGAGCAACTGGGCACTAAATCGGAACCCTAAAGGGAGCCCCCGATTTAGAGCTTGACGGGGAAAGCCGGCGAAGAGGGCGAGAAAGGAAGGGAAGAAAGCGCCACCTAGCGGAAGCGATCCTAGGGCGATCA	0.25	0.07	1.09
120	GGGGACCAGGTGCCGTAAGGGACTGGTTGGCACTAAATCGGAACCCTAAAGGGAGCCCCCGATTTAGAGCTTGACGGGGAAAGCCGGTCTACGTGGCGAGAAAGGAAGGGAAGAAAGCGCCACCTAGCGGAAGCGATCCTAGGGCGATCA	NaN	0.09	0.92
121	GGGGACCAGGTGCCGTAAGACCAAGCGAAGCACTAAATCGGAACCCTAAAGGGAGCCCCCGATTTAGAGCTTGACGGGGAAAGGATGCGAACGTGGCGAGAAAGGAAGGGAAGAAAGCGCCACCTAGCGGAAGCGATCCTAGGGCGATCA	NaN	0.19	1.06
122	GGGGACCAGGTGCCGTAAGTAAACTAGCGGCACTAAATCGGAACCCTAAAGGGAGCCCCCGATTTAGAGCTTGACGGGGGCGGCCGGCGAACGTGGCGAGAAAGGAAGGGAAGAAAGCGCCACCTAGCGGAAGCGATCCTAGGGCGATCA	NaN	0.15	1.01
123	GGGGACCAGGTGCCGTAAGCTTCAACAGGGCACTAAATCGGAACCCTAAAGGGAGCCCCCGATTTAGAGCTTGACATCGAAAGCCGGCGAACGTGGCGAGAAAGGAAGGGAAGAAAGCGCCACCTAGCGGAAGCGATCCTAGGGCGATCA	0.24	0.23	1.07
124	GGGGACCAGGTGCCGTAAGCCTGCGTACGGCACTAAATCGGAACCCTAAAGGGAGCCCCCGATTTAGAGCTCACCGGGGAAAGCCGGCGAACGTGGCGAGAAAGGAAGGGAAGAAAGCGCCACCTAGCGGAAGCGATCCTAGGGCGATCA	NaN	0.08	1.13
125	GGGGACCAGGTGCCGTAAGAGTGTTTTCTGCACTAAATCGGAACCCTAAAGGGAGCCCCCGATTTAGGTGTTGACGGGGAAAGCCGGCGAACGTGGCGAGAAAGGAAGGGAAGAAAGCGCCACCTAGCGGAAGCGATCCTAGGGCGATCA	NaN	0.15	1.04
126	GGGGACCAGGTGCCGTAAGTCTCTAAGCCGCACTAAATCGGAACCCTAAAGGGAGCCCCCGATCATGAGCTTGACGGGGAAAGCCGGCGAACGTGGCGAGAAAGGAAGGGAAGAAAGCGCCACCTAGCGGAAGCGATCCTAGGGCGATCA	0.45	0.08	1.03
127	GGGGACCAGGTGCCGTAAGATTGAAAGAAGCACTAAATCGGAACCCTAAAGGGAGCCCCACTTTTAGAGCTTGACGGGGAAAGCCGGCGAACGTGGCGAGAAAGGAAGGGAAGAAAGCGCCACCTAGCGGAAGCGATCCTAGGGCGATCA	NaN	NaN	1.47
128	GGGGACCAGGTGCCGTAAGGACAGGTATCGCACTAAATCGGAACCCTAAAGGGAGATTCCGATTTAGAGCTTGACGGGGAAAGCCGGCGAACGTGGCGAGAAAGGAAGGGAAGAAAGCGCCACCTAGCGGAAGCGATCCTAGGGCGATCA	NaN	0.16	1.13
129	GGGGACCAGGTGCCGTAAGGTCTCTGTTAGCACTAAATCGGAACCCTAAAGTATGCCCCCGATTTAGAGCTTGACGGGGAAAGCCGGCGAACGTGGCGAGAAAGGAAGGGAAGAAAGCGCCACCTAGCGGAAGCGATCCTAGGGCGATCA	NaN	0.08	0.82
130	GGGGACCAGGTGCCGTAAGTGCTATGTAAGCACTAAATCGGAACCCTTTCGGGAGCCCCCGATTTAGAGCTTGACGGGGAAAGCCGGCGAACGTGGCGAGAAAGGAAGGGAAGAAAGCGCCACCTAGCGGAAGCGATCCTAGGGCGATCA	NaN	0.39	1.04
131	GGGGACCAGGTGCCGTAAGAAGAGAACTCGCACTAAATCGGAAGTTTAAAGGGAGCCCCCGATTTAGAGCTTGACGGGGAAAGCCGGCGAACGTGGCGAGAAAGGAAGGGAAGAAAGCGCCACCTAGCGGAAGCGATCCTAGGGCGATCA	NaN	NaN	NaN
132	GGGGACCAGGTGCCGTAAGCTCTGCTCACGCACTAAATCAAGACCCTAAAGGGAGCCCCCGATTTAGAGCTTGACGGGGAAAGCCGGCGAACGTGGCGAGAAAGGAAGGGAAGAAAGCGCCACCTAGCGGAAGCGATCCTAGGGCGATCA	0.4	0.13	1.08
133	GGGGACCAGGTGCCGTAAGATAGAGATTCGCACTACCGCGGAACCCTAAAGGGAGCCCCCGATTTAGAGCTTGACGGGGAAAGCCGGCGAACGTGGCGAGAAAGGAAGGGAAGAAAGCGCCACCTAGCGGAAGCGATCCTAGGGCGATCA	NaN	0.1	0.78
134	GGGGACCAGGTGCCGTAAGTACCCTACGGGCGAGAAATCGGAACCCTAAAGGGAGCCCCCGATTTAGAGCTTGACGGGGAAAGCCGGCGAACGTGGCGAGAAAGGAAGGGAAGAAAGCGCCACCTAGCGGAAGCGATCCTAGGGCGATCA	NaN	0.12	0.94
135	GGGGACCAGGTGCCGTAAGGACATTCATAAAGCCGGACAGGCAGCGACAGCCCTGACAGACAAGACTCTCCTAGCTGCGTCCTCGTCTTCACCGGTCGCGTTCCTGAAACGCAGATGTGCCTACAGCCGTTGGCGATCCTAGGGCGATCA	0.23	0.05	1.31
136	GGGGACCAGGTGCCGTAAGAGGATTCGCTAAGCCGGACAGGCAGCGACAGCCCTGACAGACAAGACTCTCCTAGCTGCGTCCTCGTCTTCACCGGTCGCGTTCCTGAAACGCAGATGTGCCTACAGCATAACGCGATCCTAGGGCGATCA	0.2	0.08	1.42
137	GGGGACCAGGTGCCGTAAGTAAGCCTCCTAAGCCGGACAGGCAGCGACAGCCCTGACAGACAAGACTCTCCTAGCTGCGTCCTCGTCTTCACCGGTCGCGTTCCTGAAACGCAGATGTGCCTATTACCGCACGCGATCCTAGGGCGATCA	0.16	0.12	1.33
138	GGGGACCAGGTGCCGTAAGGGGTATGTTAAAGCCGGACAGGCAGCGACAGCCCTGACAGACAAGACTCTCCTAGCTGCGTCCTCGTCTTCACCGGTCGCGTTCCTGAAACGCAGATGTGAAGACAGCCGCACGCGATCCTAGGGCGATCA	0.21	0.07	1.29
139	GGGGACCAGGTGCCGTAAGTGCACGGCGTAAGCCGGACAGGCAGCGACAGCCCTGACAGACAAGACTCTCCTAGCTGCGTCCTCGTCTTCACCGGTCGCGTTCCTGAAACGCAGAATCGCCTACAGCCGCACGCGATCCTAGGGCGATCA	0.18	0.05	1.31
140	GGGGACCAGGTGCCGTAAGAGCTAACGTAAAGCCGGACAGGCAGCGACAGCCCTGACAGACAAGACTCTCCTAGCTGCGTCCTCGTCTTCACCGGTCGCGTTCCTGAAACGTCTATGTGCCTACAGCCGCACGCGATCCTAGGGCGATCA	0.16	0.07	1.2
141	GGGGACCAGGTGCCGTAAGAGAAGCCGCTAAGCCGGACAGGCAGCGACAGCCCTGACAGACAAGACTCTCCTAGCTGCGTCCTCGTCTTCACCGGTCGCGTTCCTGATCTGCAGATGTGCCTACAGCCGCACGCGATCCTAGGGCGATCA	0.19	0.07	1.4
142	GGGGACCAGGTGCCGTAAGCACTGGGTTCAAGCCGGACAGGCAGCGACAGCCCTGACAGACAAGACTCTCCTAGCTGCGTCCTCGTCTTCACCGGTCGCGTTCGCCAAACGCAGATGTGCCTACAGCCGCACGCGATCCTAGGGCGATCA	0.21	0.07	1.2
143	GGGGACCAGGTGCCGTAAGGCCCGCCTAAAAGCCGGACAGGCAGCGACAGCCCTGACAGACAAGACTCTCCTAGCTGCGTCCTCGTCTTCACCGGTCGCCAACCTGAAACGCAGATGTGCCTACAGCCGCACGCGATCCTAGGGCGATCA	0.16	0.07	1.13
144	GGGGACCAGGTGCCGTAAGTGAAGGGCACAAGCCGGACAGGCAGCGACAGCCCTGACAGACAAGACTCTCCTAGCTGCGTCCTCGTCTTCACCGGCACCGTTCCTGAAACGCAGATGTGCCTACAGCCGCACGCGATCCTAGGGCGATCA	0.12	0.05	1.15
145	GGGGACCAGGTGCCGTAAGGTTCAAGAACAAGCCGGACAGGCAGCGACAGCCCTGACAGACAAGACTCTCCTAGCTGCGTCCTCGTCTTCAGTAGTCGCGTTCCTGAAACGCAGATGTGCCTACAGCCGCACGCGATCCTAGGGCGATCA	0.17	0.06	1.27
146	GGGGACCAGGTGCCGTAAGTCTCAGCGAAAAGCCGGACAGGCAGCGACAGCCCTGACAGACAAGACTCTCCTAGCTGCGTCCTCGTCAATACCGGTCGCGTTCCTGAAACGCAGATGTGCCTACAGCCGCACGCGATCCTAGGGCGATCA	0.15	0.07	1.31
147	GGGGACCAGGTGCCGTAAGTTCAACCGGTAAGCCGGACAGGCAGCGACAGCCCTGACAGACAAGACTCTCCTAGCTGCGTCCTACCCTTCACCGGTCGCGTTCCTGAAACGCAGATGTGCCTACAGCCGCACGCGATCCTAGGGCGATCA	0.16	0.06	1.36
148	GGGGACCAGGTGCCGTAAGACCTCAAGTGAAGCCGGACAGGCAGCGACAGCCCTGACAGACAAGACTCTCCTAGCTGCGCTATCGTCTTCACCGGTCGCGTTCCTGAAACGCAGATGTGCCTACAGCCGCACGCGATCCTAGGGCGATCA	0.16	0.05	1.28
149	GGGGACCAGGTGCCGTAAGGAAGGCCCGCAAGCCGGACAGGCAGCGACAGCCCTGACAGACAAGACTCTCCTAGCATAGTCCTCGTCTTCACCGGTCGCGTTCCTGAAACGCAGATGTGCCTACAGCCGCACGCGATCCTAGGGCGATCA	0.16	0.06	1.31
150	GGGGACCAGGTGCCGTAAGAAAGTCAAGCAAGCCGGACAGGCAGCGACAGCCCTGACAGACAAGACTCTCCCGTCTGCGTCCTCGTCTTCACCGGTCGCGTTCCTGAAACGCAGATGTGCCTACAGCCGCACGCGATCCTAGGGCGATCA	0.19	0.07	1.23
151	GGGGACCAGGTGCCGTAAGCTTGTGATTAAAGCCGGACAGGCAGCGACAGCCCTGACAGACAAGACTGAACTAGCTGCGTCCTCGTCTTCACCGGTCGCGTTCCTGAAACGCAGATGTGCCTACAGCCGCACGCGATCCTAGGGCGATCA	0.23	0.08	1.27
152	GGGGACCAGGTGCCGTAAGGGTGACGTTAAAGCCGGACAGGCAGCGACAGCCCTGACAGACAATCTTCTCCTAGCTGCGTCCTCGTCTTCACCGGTCGCGTTCCTGAAACGCAGATGTGCCTACAGCCGCACGCGATCCTAGGGCGATCA	0.21	0.07	1.24
153	GGGGACCAGGTGCCGTAAGCCCTATGTGTAAGCCGGACAGGCAGCGACAGCCCTGACAGGAGAGACTCTCCTAGCTGCGTCCTCGTCTTCACCGGTCGCGTTCCTGAAACGCAGATGTGCCTACAGCCGCACGCGATCCTAGGGCGATCA	0.14	0.05	1.38
154	GGGGACCAGGTGCCGTAAGGGGCCTGGTCAAGCCGGACAGGCAGCGACAGCCCTGCACGACAAGACTCTCCTAGCTGCGTCCTCGTCTTCACCGGTCGCGTTCCTGAAACGCAGATGTGCCTACAGCCGCACGCGATCCTAGGGCGATCA	0.16	0.05	1.34
155	GGGGACCAGGTGCCGTAAGACAGGACTAGAAGCCGGACAGGCAGCGACAGCTAAGACAGACAAGACTCTCCTAGCTGCGTCCTCGTCTTCACCGGTCGCGTTCCTGAAACGCAGATGTGCCTACAGCCGCACGCGATCCTAGGGCGATCA	0.19	0.03	1.36
156	GGGGACCAGGTGCCGTAAGCAGAGATCACAAGCCGGACAGGCAGCGAATCCCCTGACAGACAAGACTCTCCTAGCTGCGTCCTCGTCTTCACCGGTCGCGTTCCTGAAACGCAGATGTGCCTACAGCCGCACGCGATCCTAGGGCGATCA	0.13	0.07	1.36
157	GGGGACCAGGTGCCGTAAGATTTGGAGGGAAGCCGGACAGGCAAGAACAGCCCTGACAGACAAGACTCTCCTAGCTGCGTCCTCGTCTTCACCGGTCGCGTTCCTGAAACGCAGATGTGCCTACAGCCGCACGCGATCCTAGGGCGATCA	0.21	0.08	1.31
158	GGGGACCAGGTGCCGTAAGGGCGTGTATTAAGCCGGACATCAAGCGACAGCCCTGACAGACAAGACTCTCCTAGCTGCGTCCTCGTCTTCACCGGTCGCGTTCCTGAAACGCAGATGTGCCTACAGCCGCACGCGATCCTAGGGCGATCA	0.14	0.05	1.32
159	GGGGACCAGGTGCCGTAAGTCGTGCCGCGAAGCCGTCAAGGCAGCGACAGCCCTGACAGACAAGACTCTCCTAGCTGCGTCCTCGTCTTCACCGGTCGCGTTCCTGAAACGCAGATGTGCCTACAGCCGCACGCGATCCTAGGGCGATCA	0.19	0.06	1.25
160	GGGGACCAGGTGCCGTAAGGGTCGGGATCAACGGGGACAGGCAGCGACAGCCCTGACAGACAAGACTCTCCTAGCTGCGTCCTCGTCTTCACCGGTCGCGTTCCTGAAACGCAGATGTGCCTACAGCCGCACGCGATCCTAGGGCGATCA	0.23	0.06	1.14
161	GGGGACCAGGTGCCGTAAGGGCAAGGCTGTAGAGCTTGACGGGGAAAGCCGGCGAACGTGGCGAGAAAGGAAGGGAAGAAAGCGTTTTCATTTTTTTTTTTCCACCTAGCGGATGACTCTTTTTTTTTCTTAGCGATCCTAGGGCGATCA	0.21	0.06	0.95
162	GGGGACCAGGTGCCGTAAGGAGCGCCGCTTAGAGCTTGACGGGGAAAGCCGGCGAACGTGGCGAGAAAGGAAGGGAAGAAAGCGTTTTCATTTTTTTTTTTCCACCTAGCGGATGACTCTTTTTTTTTCTTAGCGATCCTAGGGCGATCA	NaN	NaN	1.14
163	GGGGACCAGGTGCCGTAAGGGCGATCGTCTAGAGCTTGACGGGGAAAGCCGGCGAACGTGGCGAGAAAGGAAGGGAAGAAAGCGTTTTCATTTTTTTTTTTCCACCTAGCGGATGACTCTTTTTTTTTCTTAGCGATCCTAGGGCGATCA	NaN	NaN	1.16
164	GGGGACCAGGTGCCGTAAGAGCATGAGACTAGAGCTTGACGGGGAAAGCCGGCGAACGTGGCGAGAAAGGAAGGGAAGAAAGCGTTTTCATTTTTTTTTTTCCACCTAGCGGATGACTCTTTTTTTTTCTTAGCGATCCTAGGGCGATCA	NaN	0.05	0.7
165	GGGGACCAGGTGCCGTAAGCCCGTAGCTGTAGAGCTTGACGGGGAAAGCCGGCGAACGTGGCGAGAAAGGAAGGGAAGAAAGCGTTTTCATTTTTTTTTTTCCACCTAGCGGATGACTCTTTTTTTTTCTTAGCGATCCTAGGGCGATCA	NaN	NaN	0.94
166	GGGGACCAGGTGCCGTAAGGAGCTCGGTGTAGAGCTTGACGGGGAAAGCCGGCGAACGTGGCGAGAAAGGAAGGGAAGAAAGCGTTTTCATTTTTTTTTTTCCACCTAGCGGATGACTCTTTTTTTTTCTTAGCGATCCTAGGGCGATCA	0.18	0.09	0.92
167	GGGGACCAGGTGCCGTAAGTCAGTCGTCATAGAGCTTGACGGGGAAAGCCGGCGAACGTGGCGAGAAAGGAAGGGAAGAAAGCGTTTTCATTTTTTTTTTTCCACCTAGCGGATGACTCTTTTTTTTTCTTAGCGATCCTAGGGCGATCA	0.26	0.09	0.96
168	GGGGACCAGGTGCCGTAAGGTAGTGCCGTTAGAGCTTGACGGGGAAAGCCGGCGAACGTGGCGAGAAAGGAAGGGAAGAAAGCGTTTTCATTTTTTTTTTTCCACCTAGCGGATGACTCTTTTTTTTTCTTAGCGATCCTAGGGCGATCA	0.3	0.13	1
169	GGGGACCAGGTGCCGTAAGAAGGGCAGGCTAGAGCTTGACGGGGAAAGCCGGCGAACGTGGCGAGAAAGGAAGGGAAGAAAGCGTTTTCATTTTTTTTTTTCCACCTAGCGGATGACTCTTTTTTTTTCTTAGCGATCCTAGGGCGATCA	0.16	0.16	1.05
170	GGGGACCAGGTGCCGTAAGGACAACATTCTAGAGCTTGACGGGGAAAGCCGGCGAACGTGGCGAGAAAGGAAGGGAAGAAAGCGTTTTCATTTTTTTTTTTCCACCTAGCGGATGACTCTTTTTTTTTCTTAGCGATCCTAGGGCGATCA	NaN	NaN	0.99
171	GGGGACCAGGTGCCGTAAGCACCATTTACTAGAGCTTGACGGGGAAAGCCGGCGAACGTGGCGAGAAAGGAAGGGAAGAAAGCGTTTTCATTTTTTTTTTTCCACCTAGCGGATGACTCTTTTTTTTTCTTAGCGATCCTAGGGCGATCA	0.18	0.14	1
172	GGGGACCAGGTGCCGTAAGCTCGATTACCTAGAGCTTGACGGGGAAAGCCGGCGAACGTGGCGAGAAAGGAAGGGAAGAAAGCGTTTTCATTTTTTTTTTTCCACCTAGCGGATGACTCTTTTTTTTTCTTAGCGATCCTAGGGCGATCA	0.12	0.18	1.08
173	GGGGACCAGGTGCCGTAAGCACCCTCTCTTAGAGCTTGACGGGGAAAGCCGGCGAACGTGGCGAGAAAGGAAGGGAAGAAAGCGTTTTCATTTTTTTTTTTCCACCTAGCGGATGACTCTTTTTTTTTCTTAGCGATCCTAGGGCGATCA	NaN	NaN	NaN
174	GGGGACCAGGTGCCGTAAGGAGGCAATTGTAGAGCTTGACGGGGAAAGCCGGCGAACGTGGCGAGAAAGGAAGGGAAGAAAGCGTTTTCATTTTTTTTTTTCCACCTAGCGGATGACTCTTTTTTTTTCTTAGCGATCCTAGGGCGATCA	0.27	0.07	1
175	GGGGACCAGGTGCCGTAAGAATGTAGTCCTAGAGCTTGACGGGGAAAGCCGGCGAACGTGGCGAGAAAGGAAGGGAAGAAAGCGTTTTCATTTTTTTTTTTCCACCTAGCGGATGACTCTTTTTTTTTCTTAGCGATCCTAGGGCGATCA	0.27	0.07	0.97
176	GGGGACCAGGTGCCGTAAGTATTTCAAAGTAGAGCTTGACGGGGAAAGCCGGCGAACGTGGCGAGAAAGGAAGGGAAGAAAGCGTTTTCATTTTTTTTTTTCCACCTAGCGGATGACTCTTTTTTTTTCTTAGCGATCCTAGGGCGATCA	NaN	NaN	0.98
177	GGGGACCAGGTGCCGTAAGATGTTGCGTGTAGAGCTTGACGGGGAAAGCCGGCGAACGTGGCGAGAAAGGAAGGGAAGAAAGCGTTTTCATTTTTTTTTTTCCACCTAGCGGATGACTCTTTTTTTTTCTTAGCGATCCTAGGGCGATCA	NaN	0.77	1.04
178	GGGGACCAGGTGCCGTAAGCTTTCGTTGATAGAGCTTGACGGGGAAAGCCGGCGAACGTGGCGAGAAAGGAAGGGAAGAAAGCGTTTTCATTTTTTTTTTTCCACCTAGCGGATGACTCTTTTTTTTTCTTAGCGATCCTAGGGCGATCA	0.28	0.18	1.09
179	GGGGACCAGGTGCCGTAAGCGTAATCCTTTAGAGCTTGACGGGGAAAGCCGGCGAACGTGGCGAGAAAGGAAGGGAAGAAAGCGTTTTCATTTTTTTTTTTCCACCTAGCGGATGACTCTTTTTTTTTCTTAGCGATCCTAGGGCGATCA	0.26	0.17	0.81
180	GGGGACCAGGTGCCGTAAGATCGGACCACTAGAGCTTGACGGGGAAAGCCGGCGAACGTGGCGAGAAAGGAAGGGAAGAAAGCGTTTTCATTTTTTTTTTTCCACCTAGCGGATGACTCTTTTTTTTTCTTAGCGATCCTAGGGCGATCA	0.2	0.16	1.04
181	GGGGACCAGGTGCCGTAAGGTCCGTCCCGCGGATTAGAAGCCGCCGAGCGGGCGACAGCCCTCCGACGGAAGACTCTCCTCCGTGCGTCCTCGTCTTCGAAACGCAGATGTGCCTCGCGCCGCACTGCTCCGGCGATCCTAGGGCGATCA	0.17	3.93	1.17
182	GGGGACCAGGTGCCGTAAGCGCCGTAACCCGGATTAGAAGCCGCCGAGCGGGCGACAGCCCTCCGACGGAAGACTCTCCTCCGTGCGTCCTCGTCTTCGAAACGCAGATGTGCCTCGCGCCGCACTGCTCCGGCGATCCTAGGGCGATCA	0.17	4.23	1.14
183	GGGGACCAGGTGCCGTAAGTAGGGTGAATCGGATTAGAAGCCGCCGAGCGGGCGACAGCCCTCCGACGGAAGACTCTCCTCCGTGCGTCCTCGTCTTCGAAACGCAGATGTGCCTCGCGCCGCACTGCTCCGGCGATCCTAGGGCGATCA	0.29	4.36	1.07
184	GGGGACCAGGTGCCGTAAGTATCGCGGGACGGATTAGAAGCCGCCGAGCGGGCGACAGCCCTCCGACGGAAGACTCTCCTCCGTGCGTCCTCGTCTTCGAAACGCAGATGTGCCTCGCGCCGCACTGCTCCGGCGATCCTAGGGCGATCA	0.23	4.21	1.24
185	GGGGACCAGGTGCCGTAAGGTCGGCTACGCGGATTAGAAGCCGCCGAGCGGGCGACAGCCCTCCGACGGAAGACTCTCCTCCGTGCGTCCTCGTCTTCGAAACGCAGATGTGCCTCGCGCCGCACTGCTCCGGCGATCCTAGGGCGATCA	0.19	4.58	1.08
186	GGGGACCAGGTGCCGTAAGGTGCTCCTCACGGATTAGAAGCCGCCGAGCGGGCGACAGCCCTCCGACGGAAGACTCTCCTCCGTGCGTCCTCGTCTTCGAAACGCAGATGTGCCTCGCGCCGCACTGCTCCGGCGATCCTAGGGCGATCA	0.16	4.82	1.26
187	GGGGACCAGGTGCCGTAAGCAAATTCAACCGGATTAGAAGCCGCCGAGCGGGCGACAGCCCTCCGACGGAAGACTCTCCTCCGTGCGTCCTCGTCTTCGAAACGCAGATGTGCCTCGCGCCGCACTGCTCCGGCGATCCTAGGGCGATCA	0.25	4.67	1.16
188	GGGGACCAGGTGCCGTAAGCGGGATTGTACGGATTAGAAGCCGCCGAGCGGGCGACAGCCCTCCGACGGAAGACTCTCCTCCGTGCGTCCTCGTCTTCGAAACGCAGATGTGCCTCGCGCCGCACTGCTCCGGCGATCCTAGGGCGATCA	0.22	4.02	1.22
189	GGGGACCAGGTGCCGTAAGTCGTAGCTTCCGGATTAGAAGCCGCCGAGCGGGCGACAGCCCTCCGACGGAAGACTCTCCTCCGTGCGTCCTCGTCTTCGAAACGCAGATGTGCCTCGCGCCGCACTGCTCCGGCGATCCTAGGGCGATCA	0.2	4.52	1.07
190	GGGGACCAGGTGCCGTAAGGTAATCTTGTCGGATTAGAAGCCGCCGAGCGGGCGACAGCCCTCCGACGGAAGACTCTCCTCCGTGCGTCCTCGTCTTCGAAACGCAGATGTGCCTCGCGCCGCACTGCTCCGGCGATCCTAGGGCGATCA	0.16	4.83	1.24
191	GGGGACCAGGTGCCGTAAGCCTACGAATCCGGATTAGAAGCCGCCGAGCGGGCGACAGCCCTCCGACGGAAGACTCTCCTCCGTGCGTCCTCGTCTTCGAAACGCAGATGTGCCTCGCGCCGCACTGCTCCGGCGATCCTAGGGCGATCA	0.24	4.42	1.07
192	GGGGACCAGGTGCCGTAAGAACAGAAGATCGGATTAGAAGCCGCCGAGCGGGCGACAGCCCTCCGACGGAAGACTCTCCTCCGTGCGTCCTCGTCTTCGAAACGCAGATGTGCCTCGCGCCGCACTGCTCCGGCGATCCTAGGGCGATCA	0.18	4.37	1.11
193	GGGGACCAGGTGCCGTAAGGGCCCTCACACGGATTAGAAGCCGCCGAGCGGGCGACAGCCCTCCGACGGAAGACTCTCCTCCGTGCGTCCTCGTCTTCGAAACGCAGATGTGCCTCGCGCCGCACTGCTCCGGCGATCCTAGGGCGATCA	0.21	4.08	1.28
194	GGGGACCAGGTGCCGTAAGGCTCTACGAACGGATTAGAAGCCGCCGAGCGGGCGACAGCCCTCCGACGGAAGACTCTCCTCCGTGCGTCCTCGTCTTCGAAACGCAGATGTGCCTCGCGCCGCACTGCTCCGGCGATCCTAGGGCGATCA	0.39	4.51	1.21
195	GGGGACCAGGTGCCGTAAGACGCATTTGACGGATTAGAAGCCGCCGAGCGGGCGACAGCCCTCCGACGGAAGACTCTCCTCCGTGCGTCCTCGTCTTCGAAACGCAGATGTGCCTCGCGCCGCACTGCTCCGGCGATCCTAGGGCGATCA	0.26	4.45	1.09
196	GGGGACCAGGTGCCGTAAGGCCAAACTTCCGGATTAGAAGCCGCCGAGCGGGCGACAGCCCTCCGACGGAAGACTCTCCTCCGTGCGTCCTCGTCTTCGAAACGCAGATGTGCCTCGCGCCGCACTGCTCCGGCGATCCTAGGGCGATCA	0.2	4.51	1.17
197	GGGGACCAGGTGCCGTAAGGGGTACGCTTCGGATTAGAAGCCGCCGAGCGGGCGACAGCCCTCCGACGGAAGACTCTCCTCCGTGCGTCCTCGTCTTCGAAACGCAGATGTGCCTCGCGCCGCACTGCTCCGGCGATCCTAGGGCGATCA	0.19	4.63	1.27
198	GGGGACCAGGTGCCGTAAGCCATTTTGAGCGGATTAGAAGCCGCCGAGCGGGCGACAGCCCTCCGACGGAAGACTCTCCTCCGTGCGTCCTCGTCTTCGAAACGCAGATGTGCCTCGCGCCGCACTGCTCCGGCGATCCTAGGGCGATCA	0.17	4.65	1.07
199	GGGGACCAGGTGCCGTAAGGACCCTCCTACGGATTAGAAGCCGCCGAGCGGGCGACAGCCCTCCGACGGAAGACTCTCCTCCGTGCGTCCTCGTCTTCGAAACGCAGATGTGCCTCGCGCCGCACTGCTCCGGCGATCCTAGGGCGATCA	0.19	4.6	1.2
200	GGGGACCAGGTGCCGTAAGGATACACTAACGGATTAGAAGCCGCCGAGCGGGCGACAGCCCTCCGACGGAAGACTCTCCTCCGTGCGTCCTCGTCTTCGAAACGCAGATGTGCCTCGCGCCGCACTGCTCCGGCGATCCTAGGGCGATCA	0.19	4.11	1.27
201	GGGGACCAGGTGCCGTAAGCTCAAATGGTGCACTAAATCGGAACCCTAAAGGGAGCCCCCGATTTAGAGCCGGAAGACTCTCCTCCGCGAACGTGGCGCGGAAGACTCTCCTCCGAGCGCCACCTAGCGGAAGCGATCCTAGGGCGATCA	0.23	8.48	1.24
202	GGGGACCAGGTGCCGTAAGCCAAATCAATGCACTAAATCGGAACCCTAAAGGGAGCCCCCGATTTAGAGCCGGAAGACTCTCCTCCGCGAACGTGGCGCGGAAGACTCTCCTCCGAGCGCCACCTAGCGGAAGCGATCCTAGGGCGATCA	0.3	7.97	1.03
203	GGGGACCAGGTGCCGTAAGACTTCGGCTTGCACTAAATCGGAACCCTAAAGGGAGCCCCCGATTTAGAGCCGGAAGACTCTCCTCCGCGAACGTGGCGCGGAAGACTCTCCTCCGAGCGCCACCTAGCGGAAGCGATCCTAGGGCGATCA	0.28	8.48	1.12
204	GGGGACCAGGTGCCGTAAGGTTGAATGAGGCACTAAATCGGAACCCTAAAGGGAGCCCCCGATTTAGAGCCGGAAGACTCTCCTCCGCGAACGTGGCGCGGAAGACTCTCCTCCGAGCGCCACCTAGCGGAAGCGATCCTAGGGCGATCA	NaN	8.45	1.01
205	GGGGACCAGGTGCCGTAAGCCTACCTGTTGCACTAAATCGGAACCCTAAAGGGAGCCCCCGATTTAGAGCCGGAAGACTCTCCTCCGCGAACGTGGCGCGGAAGACTCTCCTCCGAGCGCCACCTAGCGGAAGCGATCCTAGGGCGATCA	0.28	7.47	1.08
206	GGGGACCAGGTGCCGTAAGATAGTAGGGAGCACTAAATCGGAACCCTAAAGGGAGCCCCCGATTTAGAGCCGGAAGACTCTCCTCCGCGAACGTGGCGCGGAAGACTCTCCTCCGAGCGCCACCTAGCGGAAGCGATCCTAGGGCGATCA	NaN	6.94	0.89
207	GGGGACCAGGTGCCGTAAGAACGTTGCGTGCACTAAATCGGAACCCTAAAGGGAGCCCCCGATTTAGAGCCGGAAGACTCTCCTCCGCGAACGTGGCGCGGAAGACTCTCCTCCGAGCGCCACCTAGCGGAAGCGATCCTAGGGCGATCA	0.25	8.04	1.16
208	GGGGACCAGGTGCCGTAAGTTCGAGCGGGGCACTAAATCGGAACCCTAAAGGGAGCCCCCGATTTAGAGCCGGAAGACTCTCCTCCGCGAACGTGGCGCGGAAGACTCTCCTCCGAGCGCCACCTAGCGGAAGCGATCCTAGGGCGATCA	0.3	8.07	1.04
209	GGGGACCAGGTGCCGTAAGTGAAACGAGTGCACTAAATCGGAACCCTAAAGGGAGCCCCCGATTTAGAGCCGGAAGACTCTCCTCCGCGAACGTGGCGCGGAAGACTCTCCTCCGAGCGCCACCTAGCGGAAGCGATCCTAGGGCGATCA	0.25	8.87	1.01
210	GGGGACCAGGTGCCGTAAGACGGCTCCTTGCACTAAATCGGAACCCTAAAGGGAGCCCCCGATTTAGAGCCGGAAGACTCTCCTCCGCGAACGTGGCGCGGAAGACTCTCCTCCGAGCGCCACCTAGCGGAAGCGATCCTAGGGCGATCA	NaN	7.95	1.53
211	GGGGACCAGGTGCCGTAAGTAATTCATGTGCACTAAATCGGAACCCTAAAGGGAGCCCCCGATTTAGAGCTTGACGGGGTTTTTTTTTTTTTTTGGCGAGAAAGGAATGACTCATATTTTTTTTTTTTTTTAGCGATCCTAGGGCGATCA	1.59	0.22	0.56
212	GGGGACCAGGTGCCGTAAGGTTCTCTAACGCACTAAATCGGAACCCTAAAGGGAGCCCCCGATTTAGAGCTTGACGGGGTTTTTTTTTTTTTTTGGCGAGAAAGGAATGACTCATATTTTTTTTTTTTTTTAGCGATCCTAGGGCGATCA	1.64	0.21	0.53
213	GGGGACCAGGTGCCGTAAGTACAGTCCGGGCACTAAATCGGAACCCTAAAGGGAGCCCCCGATTTAGAGCTTGACGGGGTTTTTTTTTTTTTTTGGCGAGAAAGGAATGACTCATATTTTTTTTTTTTTTTAGCGATCCTAGGGCGATCA	1.9	0.1	0.51
214	GGGGACCAGGTGCCGTAAGCTGTGACACCGCACTAAATCGGAACCCTAAAGGGAGCCCCCGATTTAGAGCTTGACGGGGTTTTTTTTTTTTTTTGGCGAGAAAGGAATGACTCATATTTTTTTTTTTTTTTAGCGATCCTAGGGCGATCA	1.83	0.19	0.56
215	GGGGACCAGGTGCCGTAAGTATTGCGTCCGCACTAAATCGGAACCCTAAAGGGAGCCCCCGATTTAGAGCTTGACGGGGTTTTTTTTTTTTTTTGGCGAGAAAGGAATGACTCATATTTTTTTTTTTTTTTAGCGATCCTAGGGCGATCA	1.73	0.36	0.57
216	GGGGACCAGGTGCCGTAAGTGATCGCAGAGCACTAAATCGGAACCCTAAAGGGAGCCCCCGATTTAGAGCTTGACGGGGTTTTTTTTTTTTTTTGGCGAGAAAGGAATGACTCATATTTTTTTTTTTTTTTAGCGATCCTAGGGCGATCA	1.68	0.27	0.58
217	GGGGACCAGGTGCCGTAAGTAGTCTTGCAGCACTAAATCGGAACCCTAAAGGGAGCCCCCGATTTAGAGCTTGACGGGGTTTTTTTTTTTTTTTGGCGAGAAAGGAATGACTCATATTTTTTTTTTTTTTTAGCGATCCTAGGGCGATCA	1.58	0.17	0.51
218	GGGGACCAGGTGCCGTAAGCTCAATAGTTGCACTAAATCGGAACCCTAAAGGGAGCCCCCGATTTAGAGCTTGACGGGGTTTTTTTTTTTTTTTGGCGAGAAAGGAATGACTCATATTTTTTTTTTTTTTTAGCGATCCTAGGGCGATCA	1.94	0.15	0.5
219	GGGGACCAGGTGCCGTAAGGCTGTCCAGAGCACTAAATCGGAACCCTAAAGGGAGCCCCCGATTTAGAGCTTGACGGGGTTTTTTTTTTTTTTTGGCGAGAAAGGAATGACTCATATTTTTTTTTTTTTTTAGCGATCCTAGGGCGATCA	1.77	0.16	0.51
220	GGGGACCAGGTGCCGTAAGCGTAAGTGCGGCACTAAATCGGAACCCTAAAGGGAGCCCCCGATTTAGAGCTTGACGGGGTTTTTTTTTTTTTTTGGCGAGAAAGGAATGACTCATATTTTTTTTTTTTTTTAGCGATCCTAGGGCGATCA	2	0.19	0.54
221	GGGGACCAGGTGCCGTAAGCGAACAATGCTACCTCGCCTCGTGACTCCTATACAAATTGATGAGGATTTGCGGAAGACTCTCCTCCGAACATGCTTGGCGGAAGACTCTCCTCCGGAGACTATCGCACATTGGCGATCCTAGGGCGATCA	0.19	6.6	0.88
222	GGGGACCAGGTGCCGTAAGCGAGTCGTTTCAATCCGGACAAGCCAATAAATGTTACGCTATAAATTTGATCGGAAGACTCTCCTCCGACTCCCTTATACGGAAGACTCTCCTCCGACAGGGTGTCATCTCAGGCGATCCTAGGGCGATCA	0.21	9.56	1.01
223	GGGGACCAGGTGCCGTAAGCTATGGAGGACCTCTGCTTCGTTCGAATGCTCTGTGCAGTGATGGATATAGCGGAAGACTCTCCTCCGTAAGTGATGACCGGAAGACTCTCCTCCGTTGAGTAATTGATATTGGCGATCCTAGGGCGATCA	0.25	3.41	1.09
224	GGGGACCAGGTGCCGTAAGGAGGCCCATTTCAATAATGTAATCAAAATCAGGGAAAAGGCACAATTAGTTCGGAAGACTCTCCTCCGTTCAGAACTCACGGAAGACTCTCCTCCGAGATAATACCCTAATATGCGATCCTAGGGCGATCA	NaN	NaN	0.84
225	GGGGACCAGGTGCCGTAAGTACTGAGAATAGTATTCGTTGGTTACATTATTACATAGCTGTTTTACTCAACGGAAGACTCTCCTCCGATTTATCTGAGCGGAAGACTCTCCTCCGAGAAAGCTATAATAATAGCGATCCTAGGGCGATCA	NaN	NaN	NaN
226	GGGGACCAGGTGCCGTAAGACGTGCGTTCAAATACAAGTCTAATTAACTATTACTCATCTTGGTCTACGCCGGAAGACTCTCCTCCGATACTAATCACCGGAAGACTCTCCTCCGCCTTCACGTATTCCTAAGCGATCCTAGGGCGATCA	0.2	9.44	1.22
227	GGGGACCAGGTGCCGTAAGATCGTGTGGTACAGTGAAGCTTTTACTAGAGCTTCGACAAAACGACCCAGACGGAAGACTCTCCTCCGATTTAACCCCACGGAAGACTCTCCTCCGCTATGATGGCGTATTGCGCGATCCTAGGGCGATCA	0.37	3.64	1.14
228	GGGGACCAGGTGCCGTAAGTTCACTACGAGATAGGGAGAGTTGAAATCTAGGCACATCCAAGAGTGTTGCCGGAAGACTCTCCTCCGCACACACAAGCCGGAAGACTCTCCTCCGACAAAATAAGTACAGCAGCGATCCTAGGGCGATCA	0.43	5.79	1.22
229	GGGGACCAGGTGCCGTAAGGCTCTGGACTCAAATGTGAAAACCTCCTCGAATATTAACTTTATTGTTAGACGGAAGACTCTCCTCCGAATAATTGATTCGGAAGACTCTCCTCCGATTACACTGAAGTCTAAGCGATCCTAGGGCGATCA	NaN	10.22	0.97
230	GGGGACCAGGTGCCGTAAGATGATCGACCATGGCGCACTATTCTAACAGCCTGTATAATTCTCTCATCTACGGAAGACTCTCCTCCGGAAGGTTGAGTCGGAAGACTCTCCTCCGCTTAGCTTCACCAGTACGCGATCCTAGGGCGATCA	0.27	6.04	1.26
231	GGGGACCAGGTGCCGTAAGCGATTACAGAACGAACAGTCGTTCGCGAATAAAAAACCAACGGCCTGGTAACGGAAGACTCTCCTCCGGGGATTTCGATCGGAAGACTCTCCTCCGAGACTAACCGATCGAATGCGATCCTAGGGCGATCA	0.21	11.89	1.08
232	GGGGACCAGGTGCCGTAAGTGCAACGGGAATTATCACAAACAGGCTCGTTACATACGCGTTGTAAACCTTCGGAAGACTCTCCTCCGCGCAGTTCGTTCGGAAGACTCTCCTCCGCGCATCGTGAATTAGATGCGATCCTAGGGCGATCA	0.14	9.36	1.19
233	GGGGACCAGGTGCCGTAAGACTGGACGCATCTGGTTGGTTCTGCCTGTCAATTATTTAAATCGTATCTGACGGAAGACTCTCCTCCGCTCTTCTTTAACGGAAGACTCTCCTCCGTCAGTGATAAATTCTTGGCGATCCTAGGGCGATCA	0.16	2.87	1.35
234	GGGGACCAGGTGCCGTAAGGCAGAACTCCTACCGTTCTGAATGCGGAAAATAGAGGAGGCGGTACGTAATCGGAAGACTCTCCTCCGTAGTACCGTCGCGGAAGACTCTCCTCCGTATAACCAGTGCTACTTGCGATCCTAGGGCGATCA	0.09	4.9	1.32
235	GGGGACCAGGTGCCGTAAGGGCACTCGGGATATTGTAACATAGTCCAATTTAGCGTTGCGGTATTTTTCTCGGAAGACTCTCCTCCGTCTCGGCTAGTCGGAAGACTCTCCTCCGATCAACTCTGGGAAAATGCGATCCTAGGGCGATCA	0.21	8.49	0.95
236	GGGGACCAGGTGCCGTAAGCATTAATGTCGACTTACTAGGTTCGAAAAGCGGTTAACATGAACGAAGAGCCGGAAGACTCTCCTCCGGAGAGGTATAACGGAAGACTCTCCTCCGTTATCTTAAACAATATTGCGATCCTAGGGCGATCA	NaN	NaN	NaN
237	GGGGACCAGGTGCCGTAAGCCTGCTCCACGATCCGAGTAAACTTACACAGGCTAACGATACCACAAATCTCGGAAGACTCTCCTCCGAATCACGTCTCCGGAAGACTCTCCTCCGGATAACTTGTACACCTTGCGATCCTAGGGCGATCA	0.24	12.02	1.04
238	GGGGACCAGGTGCCGTAAGAATAGCTACGGTGAAGATGTCATACCATCAATCACTCCATCTTAAATCTTCCGGAAGACTCTCCTCCGCTATGATAATCCGGAAGACTCTCCTCCGTTTATAATCTGAGAAGTGCGATCCTAGGGCGATCA	NaN	4.82	1.12
239	GGGGACCAGGTGCCGTAAGCTGCTCAGTTTGCGAGTTAGCGGAATCAAAAGATCGGGTTTCGTGAACAAACGGAAGACTCTCCTCCGACCTGAAACAACGGAAGACTCTCCTCCGAAAATTGTAGGGGTGCAGCGATCCTAGGGCGATCA	0.25	7.44	1.02
240	GGGGACCAGGTGCCGTAAGACACAGTTGTGTTACGCAAGTGCTGGCTTGGCGATATATACCTCAAGCTACCGGAAGACTCTCCTCCGTATTAGCCCTGCGGAAGACTCTCCTCCGATACGTATGCCTGATATGCGATCCTAGGGCGATCA	0.2	5.38	1.27
241	GGGGACCAGGTGCCGTAAGCACTCTATTCATTAATTATATGTAACTTTTATAACTATTTTCATTTCTATGCGGAAGACTCTCCTCCGTGCACCTTTTTCGGAAGACTCTCCTCCGCTATGTATATATCACTAGCGATCCTAGGGCGATCA	NaN	NaN	0.74
242	GGGGACCAGGTGCCGTAAGCTGCGATCCGATAATTTTTTCTTTCATCGCATATCTTATATTCATATAGCCCGGAAGACTCTCCTCCGTATCATATTTGCGGAAGACTCTCCTCCGAGAAATTAGTATACATAGCGATCCTAGGGCGATCA	NaN	NaN	1
243	GGGGACCAGGTGCCGTAAGCCAAGATTTCTTAAAAAATATAATGACAATTATAATAAGAAGTATGATACTCGGAAGACTCTCCTCCGATATACATATGCGGAAGACTCTCCTCCGTATATTTTTAATTAAATGCGATCCTAGGGCGATCA	NaN	NaN	NaN
244	GGGGACCAGGTGCCGTAAGGGACAACCGATTAGGTTTATAGTTCTTGCTGTTTATATCACTAATATTTAGCGGAAGACTCTCCTCCGAGAAAAAGAAACGGAAGACTCTCCTCCGCCAAAAACATAAAAAAAGCGATCCTAGGGCGATCA	NaN	NaN	0.71
245	GGGGACCAGGTGCCGTAAGAAATCTTGTAGCTGCTACTGCATTGATATACTAGAGGATATAATATATAACCGGAAGACTCTCCTCCGTGTATAACGACCGGAAGACTCTCCTCCGTGTGTATTCTTTACAAAGCGATCCTAGGGCGATCA	NaN	5.1	0.92
246	GGGGACCAGGTGCCGTAAGCTGGACATTGATTGTCTTCAAGATCCTTTCCCCCAACTAGCATCGTAAATACGGAAGACTCTCCTCCGGCTTTTCACGTCGGAAGACTCTCCTCCGGTACGTATATATGTAATGCGATCCTAGGGCGATCA	0.15	10.77	1.2
247	GGGGACCAGGTGCCGTAAGAACATTGTCTTTTAATCTCCTAAACGGCATGTGATTGAACACGGTTCGAGGCGGAAGACTCTCCTCCGAGGCATATATGCGGAAGACTCTCCTCCGTTTAGGTTCCCGTTTTAGCGATCCTAGGGCGATCA	0.28	5.64	1.04
248	GGGGACCAGGTGCCGTAAGTACGCACTCCCCTCTCACATGTTTTTCTCTGCTGTTTTTCCTTCCCTATTCCGGAAGACTCTCCTCCGTTTCATGTATACGGAAGACTCTCCTCCGGACTTTTTTTTTTATACGCGATCCTAGGGCGATCA	0.16	5.88	1
249	GGGGACCAGGTGCCGTAAGCCGCAACGCTAAAACCAATCCGAATAGAAACGGCGTACATACATAAAGAATCGGAAGACTCTCCTCCGACCTTCCTTACCGGAAGACTCTCCTCCGTAGGCATATGTATCGCAGCGATCCTAGGGCGATCA	0.2	7.67	1.19
250	GGGGACCAGGTGCCGTAAGAGTTCTATGCTACGTAGGCTTGATTCAGATATACGTAGTACATATGTCCCTCGGAAGACTCTCCTCCGCGTTTGCTCTACGGAAGACTCTCCTCCGTTGCGTTGGTGCTGAACGCGATCCTAGGGCGATCA	0.16	6.74	1.38
251	GGGGACCAGGTGCCGTAAGCCTCGGTCACCAGCTGACTCAGAAAAAGCAAGGTAAAAGAATGAGAGTAAACGGAAGACTCTCCTCCGTAACCATACATCGGAAGACTCTCCTCCGTTTCTGCGTAAAGCGTCGCGATCCTAGGGCGATCA	0.28	5.12	1.07
252	GGGGACCAGGTGCCGTAAGGTGTAGGTGAATTTACGTTACCAGGAATAGGGAATACTCTCTTGAATTCTACGGAAGACTCTCCTCCGCTGAAAGAATACGGAAGACTCTCCTCCGACAGAATTAAAAAAAAAGCGATCCTAGGGCGATCA	NaN	NaN	NaN
253	GGGGACCAGGTGCCGTAAGAGTGGTCAACTTCAGATTTTATAGAGTTTCATAGTATAAAAATAATAATGACGGAAGACTCTCCTCCGTTTTCTTCTGTCGGAAGACTCTCCTCCGTGATTGTTATTCAAAAAGCGATCCTAGGGCGATCA	NaN	NaN	0.52
254	GGGGACCAGGTGCCGTAAGCCATTCTGCAAATCTTAAAAGTTTTTATTTAAATATATAAGTAAGAGCGAACGGAAGACTCTCCTCCGTTCATAAAAGTCGGAAGACTCTCCTCCGATATCTTTTCGAGCGGTGCGATCCTAGGGCGATCA	0.32	10.99	1.07
255	GGGGACCAGGTGCCGTAAGTACCTCGGGCGTAAGGTTAAAAAAGTGAATCTCCATTGTTTATATAAATTTCGGAAGACTCTCCTCCGGATTCTAAACGCGGAAGACTCTCCTCCGTAATAGTAAGGATTCTCGCGATCCTAGGGCGATCA	0.19	10.05	0.94
256	GGGGACCAGGTGCCGTAAGAGACTAAATTATATTAATGATACATTATTCTCTTCAAGGATCCAATATGGCCGGAAGACTCTCCTCCGAGGAAGTCCAGCGGAAGACTCTCCTCCGATCACATCTATATATTTGCGATCCTAGGGCGATCA	NaN	NaN	NaN
257	GGGGACCAGGTGCCGTAAGTAACCAGAAGTAAGTACTCTATTAAACATCGTTATTTTCTCTTTTATTACTCGGAAGACTCTCCTCCGTTGAGAATAGACGGAAGACTCTCCTCCGTAGTATAATTTTTAAAAGCGATCCTAGGGCGATCA	NaN	NaN	0.96
258	GGGGACCAGGTGCCGTAAGGACTTGTAAGAATACAGAAAAATTACCACTTCTGTTGAAAATACTGTTTTGCGGAAGACTCTCCTCCGATCGTATATAACGGAAGACTCTCCTCCGATAAACTCTCGAGGATCGCGATCCTAGGGCGATCA	NaN	3.91	0.87
259	GGGGACCAGGTGCCGTAAGAATGGACTGGCAAGGAGCGGAAACAGAAAGAAAAGTCGAAATAGAATTTTTCGGAAGACTCTCCTCCGAATGAGGTCTTCGGAAGACTCTCCTCCGCTTGACAAAAAACAACTGCGATCCTAGGGCGATCA	0.26	14.91	0.94
260	GGGGACCAGGTGCCGTAAGTCAAGCACAAGAAAAGTTCGTCACTGTCATTAGAAAGTTTTATGAAAAGTTCGGAAGACTCTCCTCCGACATATAGTATCGGAAGACTCTCCTCCGTAGTTGAATTGAGAGTGGCGATCCTAGGGCGATCA	0.31	12.78	0.96
261	GGGGACCAGGTGCCGTAAGAAGCAGGTCGCTTGCTAATTTCTTACCATATTAGACAAGGCACTATCGTAACGGAAGACTCTCCTCCGCCAGTTAGGATCGGAAGACTCTCCTCCGTCGCATCTTTGACAAAGGCGATCCTAGGGCGATCA	0.11	5.16	1.15
262	GGGGACCAGGTGCCGTAAGCACCTCCTGCGACCTGAACGAGCAGAAACTCAAGCAGCAGCTGAATATCGACGGAAGACTCTCCTCCGAAGGAAAAAATCGGAAGACTCTCCTCCGCAATACAGACTTTCAGGGCGATCCTAGGGCGATCA	0.37	7.26	0.86
263	GGGGACCAGGTGCCGTAAGCTAAGTGCGGATGATATATCACAACCTGGGATCGGGATTCCGCAAGGTAAGCGGAAGACTCTCCTCCGTATGGGCAAAACGGAAGACTCTCCTCCGTCCACTAGTTCGGAAAAGCGATCCTAGGGCGATCA	0.15	2.28	1.11
264	GGGGACCAGGTGCCGTAAGGCGACATGAAGCGTCTGGGTTGAAAGAAAGTATGGTCTTTCCCATGACCATCGGAAGACTCTCCTCCGAGACACTGTTGCGGAAGACTCTCCTCCGGTTTCAAGTGAGAATGAGCGATCCTAGGGCGATCA	0.17	13	1.31
265	GGGGACCAGGTGCCGTAAGATGTCTGGACATCGGAAAAGAAAAGCAGTGGAAGATCAAAGGAAAAACTTGCGGAAGACTCTCCTCCGAAAATTTGCGTCGGAAGACTCTCCTCCGCTTTCACCATGCTCTAGGCGATCCTAGGGCGATCA	0.27	9.69	1
266	GGGGACCAGGTGCCGTAAGCAGGTCAGAACAGATTCTAATAGACGTTACGAAGAATTGAAGAAGAAGGGTCGGAAGACTCTCCTCCGTGGTGTCTCCGCGGAAGACTCTCCTCCGCGTTACGGTCCATCTTTGCGATCCTAGGGCGATCA	0.42	5.52	0.99
267	GGGGACCAGGTGCCGTAAGCATGAGTAGACTTCTTCAGCATTGTTTCCTTGGTTGGCATTGCGTTACCTGCGGAAGACTCTCCTCCGGGTAACGTGGTCGGAAGACTCTCCTCCGCCTGTAACATGTACTTCGCGATCCTAGGGCGATCA	0.1	4.55	1.19
268	GGGGACCAGGTGCCGTAAGTGTAGAAATTCGATGGTTCTTCTGATAAAAAGAATATTGATAGAACTTGGACGGAAGACTCTCCTCCGAACAAAGTCTCCGGAAGACTCTCCTCCGCAATGTCCTCACACAAGGCGATCCTAGGGCGATCA	NaN	NaN	0.97
269	GGGGACCAGGTGCCGTAAGAGTGAAGCCACATAATTCAGAAACTATGGATTTATTAGGGACTCTATCTCACGGAAGACTCTCCTCCGTAGAGTACAATCGGAAGACTCTCCTCCGGAATGAGATTGATATGCGCGATCCTAGGGCGATCA	0.49	7.85	1.06
270	GGGGACCAGGTGCCGTAAGCTCAGTCCCATACAATCGGTACCAGGAAATGAAAGCGAAATCTCACAAAAACGGAAGACTCTCCTCCGGAATGCTGACACGGAAGACTCTCCTCCGGATAACGATAATGATAAGCGATCCTAGGGCGATCA	0.06	4.72	0.88
271	GGGGACCAGGTGCCGTAAGGCACGCTGTGGAAATTTACAAAAAAGAATGTTGCTAGGGCGAAAAAGAAATCGGAAGACTCTCCTCCGAGATTTAAATCCGGAAGACTCTCCTCCGATTTAACTTCATTACCTGCGATCCTAGGGCGATCA	NaN	NaN	0.78
272	GGGGACCAGGTGCCGTAAGCTTGTTACACGAGCCAGCCGCTATCGCCGGTAATGAGGGTGTCTTTGAAGTCGGAAGACTCTCCTCCGGAAGTTCCAAGCGGAAGACTCTCCTCCGTGACCGAGTTATCCCATGCGATCCTAGGGCGATCA	0.24	6.77	1.17
273	GGGGACCAGGTGCCGTAAGGTCATACCCAGGACTCTCAAGTTCGTACTACACCTCTGGAGTACAAGAATGCGGAAGACTCTCCTCCGTCAAATGGGAACGGAAGACTCTCCTCCGACGATTTTGCGGCCAAGGCGATCCTAGGGCGATCA	0.2	6.65	1.02
274	GGGGACCAGGTGCCGTAAGGAGGACGTCTTATGAACGACTCTACTGTCTGGATGTCTCACGGTGATAAATCGGAAGACTCTCCTCCGGGTTACAAGACCGGAAGACTCTCCTCCGACTCCCCATACTGTGGTGCGATCCTAGGGCGATCA	0.22	8.03	1.25
275	GGGGACCAGGTGCCGTAAGCGGCGTTAGGCAGGATGAAATAGACAATGCAGCGGATACGCCGGCTCTTTCCGGAAGACTCTCCTCCGATGCATTGAATCGGAAGACTCTCCTCCGTAACAATTTGATACCTGGCGATCCTAGGGCGATCA	0.24	8.39	1.16
276	GGGGACCAGGTGCCGTAAGATTGCGTGCAAGTCTTCTCAAACCAGTGGTGCTGCCGCCGCCACTCCTGCCCGGAAGACTCTCCTCCGTACTGCTGGCTCGGAAGACTCTCCTCCGTCTACAGCATCATATGAGCGATCCTAGGGCGATCA	0.1	5.18	1.22
277	GGGGACCAGGTGCCGTAAGCTAGCTAGATGTCTAGAAGATCTTAATGTACAGCTTCACATCTACAATACACGGAAGACTCTCCTCCGAACTCCTAATGCGGAAGACTCTCCTCCGCAACAAGACGAGAAGGCGCGATCCTAGGGCGATCA	NaN	NaN	1.05
278	GGGGACCAGGTGCCGTAAGATTCAATGACGGTCACTGATGAAGTAATTGCGGAGCTTCCTGAGGAATTGCCGGAAGACTCTCCTCCGAAGGACGAAGGCGGAAGACTCTCCTCCGCTTCAAGACATGTAACTGCGATCCTAGGGCGATCA	0.33	12.67	1.22
279	GGGGACCAGGTGCCGTAAGGAAACCTCCCCCTTGCAAGAATCTGTCGAAGCCTACTTAGTCTCTTTATTTCGGAAGACTCTCCTCCGTGCCATTCACGCGGAAGACTCTCCTCCGCAAAAGAAGGATATCAAGCGATCCTAGGGCGATCA	0.15	7.56	1.68
280	GGGGACCAGGTGCCGTAAGTGCCACCCGCGTATGCGAAGGCTATATCACTTGGGGTGAATGCAGCAGTTACGGAAGACTCTCCTCCGACACAGATTGCCGGAAGACTCTCCTCCGTATTGGGTTTAGGACCTGCGATCCTAGGGCGATCA	0.16	6.1	1.21
281	GGGGACCAGGTGCCGTAAGAAGCTGCCGCCCTTTAATGATCACATTCCATCACTTGCGCTTTGGATCTGCCGGAAGACTCTCCTCCGAAACGGCTGCGCGGAAGACTCTCCTCCGAAATTTTTCATAATTTTGCGATCCTAGGGCGATCA	0.13	11.19	0.86
282	GGGGACCAGGTGCCGTAAGTGGCTCAACCTTGATGGTCATCGAATAGAAGATTCCTAAGCCCTTTTCTTTCGGAAGACTCTCCTCCGTTTCAAGCGTGCGGAAGACTCTCCTCCGGAAAACGGCATCTTCGAGCGATCCTAGGGCGATCA	0.16	6.84	0.99
283	GGGGACCAGGTGCCGTAAGCATACACGATGCGGAGGTTTGAGTTCTCTACGCCGAGAGTACACTGCCGTACGGAAGACTCTCCTCCGCTAACGGTTACCGGAAGACTCTCCTCCGACTGCCTATGAATTGACGCGATCCTAGGGCGATCA	0.18	5.74	1.3
284	GGGGACCAGGTGCCGTAAGAATGCGAATCTTTCATGAAAATTGGATTACCCGGAGTGATGATTTTCTCACCGGAAGACTCTCCTCCGTTTTACAATAGCGGAAGACTCTCCTCCGGCAATATTTGTAGAAAGGCGATCCTAGGGCGATCA	NaN	5.1	0.93
285	GGGGACCAGGTGCCGTAAGGTGTCGCTCAGATGATTTATTAAAGTATTTTTGATACTATTAATGCTGCCTCGGAAGACTCTCCTCCGTGCGGGTCACCCGGAAGACTCTCCTCCGAAGAAGCGATGCCATTAGCGATCCTAGGGCGATCA	0.21	10.57	1.21
286	GGGGACCAGGTGCCGTAAGCTGTTGCTCGGAAAAAAATAGTTAGGACACTGATATCAATAATATAGGGAACGGAAGACTCTCCTCCGTGGAAATTAGGCGGAAGACTCTCCTCCGAAGAAACGCGATAATTAGCGATCCTAGGGCGATCA	0.32	6.26	0.99
287	GGGGACCAGGTGCCGTAAGGTTGGTCGCCCCATGTTGGGGCATAATCTGGGTTAACTCGAATTGACAAGTCGGAAGACTCTCCTCCGGTAAGAAGTACCGGAAGACTCTCCTCCGTTGTGACGATATTCTGTGCGATCCTAGGGCGATCA	0.25	6.31	1.09
288	GGGGACCAGGTGCCGTAAGGGGCTTGGAGAATACCGTAATGAATTATTAAATTATTAAATTCTTCGTCTTCGGAAGACTCTCCTCCGTTAAAGGGGAGCGGAAGACTCTCCTCCGTTTTACGGCTGTTTTCTGCGATCCTAGGGCGATCA	0.26	8.03	0.92
289	GGGGACCAGGTGCCGTAAGAGGTATTGCTCAACTTCGTATATCAATATTTTTACCTCTTCTATTTCCTGACGGAAGACTCTCCTCCGCAGCATCGTTTCGGAAGACTCTCCTCCGCGGGTCTTCTTACCTAAGCGATCCTAGGGCGATCA	0.18	8.23	1.33
290	GGGGACCAGGTGCCGTAAGCTTTCAGCCTTAGATTTCAAGATGACAGTTACTTTCGTTCCGAATGACTAGCGGAAGACTCTCCTCCGAACATTTTCCACGGAAGACTCTCCTCCGAAAGAGCATTTTGATTTGCGATCCTAGGGCGATCA	0.24	10.64	0.95
291	GGGGACCAGGTGCCGTAAGGTGACGCAGAAGATTGTATTTCGGGTGCACCTATCTATCAATATTCTTGGCCGGAAGACTCTCCTCCGTCAAAATTTCTCGGAAGACTCTCCTCCGAAAAAGGAAGCGATGAGGCGATCCTAGGGCGATCA	0.2	11.88	0.75
292	GGGGACCAGGTGCCGTAAGGTCGCTGATCAGTGAGCAGGAAACTACATAATATACTTTAATAACCTCAGGCGGAAGACTCTCCTCCGTGCATGGTTACCGGAAGACTCTCCTCCGCAAGACCATAAGAAATGGCGATCCTAGGGCGATCA	0.25	4.82	1.17
293	GGGGACCAGGTGCCGTAAGTGCTACTGCGAGAAAAAAATTAAAAACAAAATAAAAAAAAAAAGAAACTTGCGGAAGACTCTCCTCCGAAGACAAAAAGCGGAAGACTCTCCTCCGAAATTCATAAAAAAAAAGCGATCCTAGGGCGATCA	NaN	NaN	NaN
294	GGGGACCAGGTGCCGTAAGTTGATCTGGAGTCTAGGAATCCCCATAATGGAATCTATATTTCTATATACCCGGAAGACTCTCCTCCGTCATTCCGTTTCGGAAGACTCTCCTCCGTATTACATTATCAATCCGCGATCCTAGGGCGATCA	0.26	5.1	1.22
295	GGGGACCAGGTGCCGTAAGACGCTCACCATGGTAGAATATGAAGGCTTTGAGTGCTGATCTAAGATCAGCCGGAAGACTCTCCTCCGCACTTACGCGACGGAAGACTCTCCTCCGGTAAAAATTTTCGAAATGCGATCCTAGGGCGATCA	0.21	6.04	1.07
296	GGGGACCAGGTGCCGTAAGAGTGAGACACTGTCTGGACGGACTATGGTAACTACTTTTTGCGTTTTTGCACGGAAGACTCTCCTCCGTGGTTTTAGTACGGAAGACTCTCCTCCGTTTTTTGCTCTGCATTGGCGATCCTAGGGCGATCA	0.28	4.39	0.85
297	GGGGACCAGGTGCCGTAAGCTCTTAGATCTTCACGTCGCTCCGCACGTAAATCCCTATTACGGAAATTATCGGAAGACTCTCCTCCGCCCTCCTATTGCGGAAGACTCTCCTCCGATTTTTCACTTTTAGTAGCGATCCTAGGGCGATCA	0.2	6.56	0.96
298	GGGGACCAGGTGCCGTAAGGAGTTTGGATTTGTTTTGATATTGTTTAGGACCAGCAGTTTCTGAGAGTTTCGGAAGACTCTCCTCCGAGCTATCCTCACGGAAGACTCTCCTCCGTGACAAGATATGTAACAGCGATCCTAGGGCGATCA	0.21	13	1.04
299	GGGGACCAGGTGCCGTAAGAATAGTGCCAACAGTGATATTCGATTTATGCCGCTTCAATTGTGCTTAAATCGGAAGACTCTCCTCCGAACTTTTAATTCGGAAGACTCTCCTCCGCAATTTAGTTTCCCATTGCGATCCTAGGGCGATCA	0.39	11.9	1.03
300	GGGGACCAGGTGCCGTAAGAAAATTCGTCGCAACATTTACTATCATCTTGTGCCAAAAAGTGACCTTATGCGGAAGACTCTCCTCCGTATTGTTGCTACGGAAGACTCTCCTCCGCTTGATCGTTCACAGATGCGATCCTAGGGCGATCA	0.18	2.82	0.99
301	GGGGACCAGGTGCCGTAAGAATGAGCCTTTACCTCGCCTCGTGACTCCTATACAAATTGATGAGGATTTGGCACGATATTTTTTTTTTTTTTTTTTGGAGTCCACTATGACTCATGTTTTTTTTTTTTTTTGGCGATCCTAGGGCGATCA	1.98	0.12	0.5
302	GGGGACCAGGTGCCGTAAGCGCTACACAGCAATCCGGACAAGCCAATAAATGTTACGCTATAAATTTGATCTTCCCACGTTTTTTTTTTTTTTTTATACTTATCTAATGACTCATATTTTTTTTTTTTTTTGGCGATCCTAGGGCGATCA	1.53	0.24	0.56
303	GGGGACCAGGTGCCGTAAGATTCTCGCTGCCTCTGCTTCGTTCGAATGCTCTGTGCAGTGATGGATATAGATGCATTTCTTTTTTTTTTTTTTTTGACTGGCCTAAATGACTCATTTTTTTTTTTTTTTTTGGCGATCCTAGGGCGATCA	1.09	0.09	0.68
304	GGGGACCAGGTGCCGTAAGGTTCTAGTGCTCAATAATGTAATCAAAATCAGGGAAAAGGCACAATTAGTTCGACTCAACTTTTTTTTTTTTTTTCTCATCCAAATTATGACTCATATTTTTTTTTTTTTTTTGCGATCCTAGGGCGATCA	4.25	0.18	0.39
305	GGGGACCAGGTGCCGTAAGCGATACTGCTAGTATTCGTTGGTTACATTATTACATAGCTGTTTTACTCAAGATCCGTCGTTTTTTTTTTTTTTTTGAGATAGTTGTATGACTCATATTTTTTTTTTTTTTTAGCGATCCTAGGGCGATCA	3.61	0.2	0.37
306	GGGGACCAGGTGCCGTAAGATATCCTCGCAAATACAAGTCTAATTAACTATTACTCATCTTGGTCTACGCGCAACGTGATTTTTTTTTTTTTTTTCACATAGAACAATGACTCATCTTTTTTTTTTTTTTTAGCGATCCTAGGGCGATCA	1.85	0.09	0.58
307	GGGGACCAGGTGCCGTAAGGACCCGCTGAACAGTGAAGCTTTTACTAGAGCTTCGACAAAACGACCCAGAATTTATTATTTTTTTTTTTTTTTTCCCAAAGGTCTTATGACTCATCTTTTTTTTTTTTTTTCGCGATCCTAGGGCGATCA	3.42	0.09	0.45
308	GGGGACCAGGTGCCGTAAGTGACCACTTCGATAGGGAGAGTTGAAATCTAGGCACATCCAAGAGTGTTGCCTTGGTGAGTTTTTTTTTTTTTTTAAGCACAAGTTGATGACTCATATTTTTTTTTTTTTTTAGCGATCCTAGGGCGATCA	2.95	0.13	0.54
309	GGGGACCAGGTGCCGTAAGAAGTCTGCTACAAATGTGAAAACCTCCTCGAATATTAACTTTATTGTTAGATGGGGAAATTTTTTTTTTTTTTTTGATTTCCCTTTGATGACTCATATTTTTTTTTTTTTTTAGCGATCCTAGGGCGATCA	2.39	0.25	0.39
310	GGGGACCAGGTGCCGTAAGCTCCAGCGCTATGGCGCACTATTCTAACAGCCTGTATAATTCTCTCATCTATTCAATATATTTTTTTTTTTTTTTGAGTGACGACCAATGACTCATCTTTTTTTTTTTTTTTCGCGATCCTAGGGCGATCA	1.89	0.09	0.66
311	GGGGACCAGGTGCCGTAAGAGTGCCGAAGACGAACAGTCGTTCGCGAATAAAAAACCAACGGCCTGGTAAAATAATTACTTTTTTTTTTTTTTTCGATTCTTAACAATGACTCATATTTTTTTTTTTTTTTTGCGATCCTAGGGCGATCA	1.51	0.1	0.45
312	GGGGACCAGGTGCCGTAAGGCTATGAGACATTATCACAAACAGGCTCGTTACATACGCGTTGTAAACCTTCGTTCGCTGTTTTTTTTTTTTTTTCGTTGTGAGTAAATGACTCATCTTTTTTTTTTTTTTTTGCGATCCTAGGGCGATCA	1.84	0.08	0.62
313	GGGGACCAGGTGCCGTAAGTTCGACTCGGTCTGGTTGGTTCTGCCTGTCAATTATTTAAATCGTATCTGAACTACAGCCTTTTTTTTTTTTTTTTTAAATTATGCTATGACTCATTTTTTTTTTTTTTTTTGGCGATCCTAGGGCGATCA	2.61	0.06	0.62
314	GGGGACCAGGTGCCGTAAGACCGGTGCTATACCGTTCTGAATGCGGAAAATAGAGGAGGCGGTACGTAATACAATCATTTTTTTTTTTTTTTTTGTCGAGCGTAAGATGACTCATTTTTTTTTTTTTTTTTTGCGATCCTAGGGCGATCA	1.79	0.08	0.38
315	GGGGACCAGGTGCCGTAAGCCTTTCGTCTATATTGTAACATAGTCCAATTTAGCGTTGCGGTATTTTTCTTTCCACTCCTTTTTTTTTTTTTTTTAGTGCAATCGAATGACTCATATTTTTTTTTTTTTTTTGCGATCCTAGGGCGATCA	2.03	0.07	0.57
316	GGGGACCAGGTGCCGTAAGTTGGTGCTATGACTTACTAGGTTCGAAAAGCGGTTAACATGAACGAAGAGCGATTAATCGTTTTTTTTTTTTTTTATAATAATTAATATGACTCATTTTTTTTTTTTTTTTTTGCGATCCTAGGGCGATCA	2.47	0.09	0.58
317	GGGGACCAGGTGCCGTAAGCGTCTTGACTGATCCGAGTAAACTTACACAGGCTAACGATACCACAAATCTACGACCCGCTTTTTTTTTTTTTTTTCTCCTCCACCAATGACTCATGTTTTTTTTTTTTTTTTGCGATCCTAGGGCGATCA	1.06	0.06	0.63
318	GGGGACCAGGTGCCGTAAGTCAAGTTCTTGTGAAGATGTCATACCATCAATCACTCCATCTTAAATCTTCTAACCCAGTTTTTTTTTTTTTTTTAATCCGAGGACCATGACTCATTTTTTTTTTTTTTTTTTGCGATCCTAGGGCGATCA	1.1	0.1	0.6
319	GGGGACCAGGTGCCGTAAGCGTAAACGACTGCGAGTTAGCGGAATCAAAAGATCGGGTTTCGTGAACAAATCCGCCCTGTTTTTTTTTTTTTTTACAATTTGTAATATGACTCATATTTTTTTTTTTTTTTAGCGATCCTAGGGCGATCA	2.27	0.07	0.36
320	GGGGACCAGGTGCCGTAAGACTACCGCCTGTTACGCAAGTGCTGGCTTGGCGATATATACCTCAAGCTACACCATCAAATTTTTTTTTTTTTTTCCTGCGTAAACTATGACTCATATTTTTTTTTTTTTTTTGCGATCCTAGGGCGATCA	4.87	0.07	0.72
321	GGGGACCAGGTGCCGTAAGAGAACTAGACATTAATTATATGTAACTTTTATAACTATTTTCATTTCTATGTGATCCATTTTTTTTTTTTTTTTTTTTTTTTTTTTCATGACTCATCTTTTTTTTTTTTTTTAGCGATCCTAGGGCGATCA	5.68	4.49	0.68
322	GGGGACCAGGTGCCGTAAGTATTCAAGCTATAATTTTTTCTTTCATCGCATATCTTATATTCATATAGCCTAGAAAAAATTTTTTTTTTTTTTTTTTGTAATTCTAATGACTCATATTTTTTTTTTTTTTTAGCGATCCTAGGGCGATCA	3.05	2.55	0.61
323	GGGGACCAGGTGCCGTAAGGTTGACCGCATTAAAAAATATAATGACAATTATAATAAGAAGTATGATACTTTTTCTGTATTTTTTTTTTTTTTTTATGATTCACGTATGACTCATTTTTTTTTTTTTTTTTTGCGATCCTAGGGCGATCA	3.1	0.56	0.34
324	GGGGACCAGGTGCCGTAAGACGCAGATTATTAGGTTTATAGTTCTTGCTGTTTATATCACTAATATTTAGTATATAGCTTTTTTTTTTTTTTTTGAAAATATTCACATGACTCATCTTTTTTTTTTTTTTTAGCGATCCTAGGGCGATCA	2.97	0.96	0.59
325	GGGGACCAGGTGCCGTAAGTCTTAGACTGGCTGCTACTGCATTGATATACTAGAGGATATAATATATAACGAACATTTTTTTTTTTTTTTTTTTCGACGTATACTCATGACTCATTTTTTTTTTTTTTTTTAGCGATCCTAGGGCGATCA	0.96	0.14	0.41
326	GGGGACCAGGTGCCGTAAGCCGTCTCCTGATTGTCTTCAAGATCCTTTCCCCCAACTAGCATCGTAAATACAAGACACATTTTTTTTTTTTTTTACGTCAGAGATTATGACTCATGTTTTTTTTTTTTTTTTGCGATCCTAGGGCGATCA	2.6	0.17	0.79
327	GGGGACCAGGTGCCGTAAGAGTTTTCGATTTTAATCTCCTAAACGGCATGTGATTGAACACGGTTCGAGGTTTATACCATTTTTTTTTTTTTTTTATGCAATTGCAATGACTCATTTTTTTTTTTTTTTTTAGCGATCCTAGGGCGATCA	0.87	0.11	0.5
328	GGGGACCAGGTGCCGTAAGCTCCCAGTGACCTCTCACATGTTTTTCTCTGCTGTTTTTCCTTCCCTATTCTTCATATTTTTTTTTTTTTTTTTTTATATATTATGTATGACTCATGTTTTTTTTTTTTTTTCGCGATCCTAGGGCGATCA	3.2	0.09	0.45
329	GGGGACCAGGTGCCGTAAGTGCCCAGACTAAAACCAATCCGAATAGAAACGGCGTACATACATAAAGAATAAATCAGGATTTTTTTTTTTTTTTTTACATATATACATGACTCATTTTTTTTTTTTTTTTTAGCGATCCTAGGGCGATCA	NaN	NaN	0.47
330	GGGGACCAGGTGCCGTAAGGGCACGAAGCTACGTAGGCTTGATTCAGATATACGTAGTACATATGTCCCTTTGATTTATTTTTTTTTTTTTTTTTCTATAAAAGGGATGACTCATTTTTTTTTTTTTTTTTCGCGATCCTAGGGCGATCA	2.79	0.1	0.69
331	GGGGACCAGGTGCCGTAAGACGACGGTAGCAGCTGACTCAGAAAAAGCAAGGTAAAAGAATGAGAGTAAAATAAATATGTTTTTTTTTTTTTTTACATATAAATTAATGACTCATTTTTTTTTTTTTTTTTCGCGATCCTAGGGCGATCA	NaN	NaN	0.38
332	GGGGACCAGGTGCCGTAAGTGATCTGACCATTTACGTTACCAGGAATAGGGAATACTCTCTTGAATTCTAACATAAGCATTTTTTTTTTTTTTTAATACGTCAAAAATGACTCATATTTTTTTTTTTTTTTAGCGATCCTAGGGCGATCA	1.84	0.12	0.51
333	GGGGACCAGGTGCCGTAAGCGTCACCTTCTTCAGATTTTATAGAGTTTCATAGTATAAAAATAATAATGAAAACAAAACTTTTTTTTTTTTTTTCTGTTTATACAAATGACTCATTTTTTTTTTTTTTTTTAGCGATCCTAGGGCGATCA	NaN	NaN	0.39
334	GGGGACCAGGTGCCGTAAGGACAAGGCCCAATCTTAAAAGTTTTTATTTAAATATATAAGTAAGAGCGAAGTATTTAAATTTTTTTTTTTTTTTAAGTTGAGCTTGATGACTCATATTTTTTTTTTTTTTTTGCGATCCTAGGGCGATCA	3.21	0.25	0.51
335	GGGGACCAGGTGCCGTAAGCATACCATGAGTAAGGTTAAAAAAGTGAATCTCCATTGTTTATATAAATTTTAAATTTGATTTTTTTTTTTTTTTAACGCAATGTGCATGACTCATTTTTTTTTTTTTTTTTCGCGATCCTAGGGCGATCA	1.86	0.25	0.47
336	GGGGACCAGGTGCCGTAAGTCCAGTGCATATATTAATGATACATTATTCTCTTCAAGGATCCAATATGGCTTCCCATAGTTTTTTTTTTTTTTTCCAGTTCTCATGATGACTCATATTTTTTTTTTTTTTTTGCGATCCTAGGGCGATCA	3.09	0.1	0.65
337	GGGGACCAGGTGCCGTAAGCAGTCAACCGTAAGTACTCTATTAAACATCGTTATTTTCTCTTTTATTACTATTAATATTTTTTTTTTTTTTTTTTAGAAAAGACTAATGACTCATTTTTTTTTTTTTTTTTAGCGATCCTAGGGCGATCA	NaN	0.48	0.44
338	GGGGACCAGGTGCCGTAAGGGCGTAGCTTAATACAGAAAAATTACCACTTCTGTTGAAAATACTGTTTTGTGGGTTGGGTTTTTTTTTTTTTTTATAATATCAATAATGACTCATATTTTTTTTTTTTTTTCGCGATCCTAGGGCGATCA	2.42	0.09	0.33
339	GGGGACCAGGTGCCGTAAGATCGTACGTACAAGGAGCGGAAACAGAAAGAAAAGTCGAAATAGAATTTTTCGCTTTTGGTTTTTTTTTTTTTTTTCTTTGAAATCAATGACTCATCTTTTTTTTTTTTTTTTGCGATCCTAGGGCGATCA	2.49	0.08	0.44
340	GGGGACCAGGTGCCGTAAGGTCGTCGGTTGAAAAGTTCGTCACTGTCATTAGAAAGTTTTATGAAAAGTTGACTGTATCTTTTTTTTTTTTTTTGTATAACAAATCATGACTCATTTTTTTTTTTTTTTTTGGCGATCCTAGGGCGATCA	1.81	0.07	0.59
341	GGGGACCAGGTGCCGTAAGGAATTCTCAGCTTGCTAATTTCTTACCATATTAGACAAGGCACTATCGTAATTCCGAGATTTTTTTTTTTTTTTTGGATTTCCTCGAATGACTCATTTTTTTTTTTTTTTTTGGCGATCCTAGGGCGATCA	1.07	0.11	0.33
342	GGGGACCAGGTGCCGTAAGTTCACGGGCTGACCTGAACGAGCAGAAACTCAAGCAGCAGCTGAATATCGAGAAGACAAATTTTTTTTTTTTTTTAAATGGCGGATCATGACTCATCTTTTTTTTTTTTTTTGGCGATCCTAGGGCGATCA	2.2	0.08	0.57
343	GGGGACCAGGTGCCGTAAGTAATGTTACAATGATATATCACAACCTGGGATCGGGATTCCGCAAGGTAAGGAAAATCTGTTTTTTTTTTTTTTTAAAAAAAATTCAATGACTCATTTTTTTTTTTTTTTTTAGCGATCCTAGGGCGATCA	NaN	NaN	0.55
344	GGGGACCAGGTGCCGTAAGGCAGTTCACAGCGTCTGGGTTGAAAGAAAGTATGGTCTTTCCCATGACCATACCCACGATTTTTTTTTTTTTTTTGTTGTGAGAAACATGACTCATGTTTTTTTTTTTTTTTAGCGATCCTAGGGCGATCA	1.07	0.15	0.59
345	GGGGACCAGGTGCCGTAAGCCTTGAGAAAATCGGAAAAGAAAAGCAGTGGAAGATCAAAGGAAAAACTTGAACACGCAATTTTTTTTTTTTTTTGCGTCGCCGTCAATGACTCATCTTTTTTTTTTTTTTTGGCGATCCTAGGGCGATCA	1.73	0.16	0.6
346	GGGGACCAGGTGCCGTAAGCCGCGGGAGACAGATTCTAATAGACGTTACGAAGAATTGAAGAAGAAGGGTATTCTTTTCTTTTTTTTTTTTTTTTCCGGTGGTGAGATGACTCATCTTTTTTTTTTTTTTTTGCGATCCTAGGGCGATCA	2.92	0.19	0.54
347	GGGGACCAGGTGCCGTAAGAGTAGTACCCCTTCTTCAGCATTGTTTCCTTGGTTGGCATTGCGTTACCTGAATTGAAGATTTTTTTTTTTTTTTTGGTATTCGTCAATGACTCATCTTTTTTTTTTTTTTTCGCGATCCTAGGGCGATCA	1.88	0.08	0.54
348	GGGGACCAGGTGCCGTAAGTAAACTCATGCGATGGTTCTTCTGATAAAAAGAATATTGATAGAACTTGGAACCTTGGTGTTTTTTTTTTTTTTTTCTCCCACTATAATGACTCATCTTTTTTTTTTTTTTTGGCGATCCTAGGGCGATCA	2.15	0.11	0.6
349	GGGGACCAGGTGCCGTAAGTATGTCATTGCATAATTCAGAAACTATGGATTTATTAGGGACTCTATCTCACGGTAACGATTTTTTTTTTTTTTTCAATTTTGACTTATGACTCATGTTTTTTTTTTTTTTTCGCGATCCTAGGGCGATCA	2.06	0.13	0.43
350	GGGGACCAGGTGCCGTAAGGTGAGATAGCTACAATCGGTACCAGGAAATGAAAGCGAAATCTCACAAAAAAATGGCAGTTTTTTTTTTTTTTTTGACAAAATCAATATGACTCATGTTTTTTTTTTTTTTTAGCGATCCTAGGGCGATCA	NaN	NaN	0.24
351	GGGGACCAGGTGCCGTAAGCGTGCGTAACGAAATTTACAAAAAAGAATGTTGCTAGGGCGAAAAAGAAATATACCCCGTTTTTTTTTTTTTTTTAATCTATAGCTGATGACTCATATTTTTTTTTTTTTTTTGCGATCCTAGGGCGATCA	3.37	0.08	0.49
352	GGGGACCAGGTGCCGTAAGTTGCTTTGATGAGCCAGCCGCTATCGCCGGTAATGAGGGTGTCTTTGAAGTTGTTTCTTTTTTTTTTTTTTTTTTCAAGGGAGATTTATGACTCATTTTTTTTTTTTTTTTTTGCGATCCTAGGGCGATCA	2.57	0.12	0.71
353	GGGGACCAGGTGCCGTAAGACATACTGTGGGACTCTCAAGTTCGTACTACACCTCTGGAGTACAAGAATGTCCCTAATGTTTTTTTTTTTTTTTGGAAAGCAGTGTATGACTCATATTTTTTTTTTTTTTTGGCGATCCTAGGGCGATCA	4.09	0.07	0.71
354	GGGGACCAGGTGCCGTAAGGTGATCCATATATGAACGACTCTACTGTCTGGATGTCTCACGGTGATAAATTGCACGGCTTTTTTTTTTTTTTTTAGACCATTGCCAATGACTCATATTTTTTTTTTTTTTTTGCGATCCTAGGGCGATCA	2.07	0.09	0.66
355	GGGGACCAGGTGCCGTAAGCCTAACAATTCAGGATGAAATAGACAATGCAGCGGATACGCCGGCTCTTTCTGTGGCTGATTTTTTTTTTTTTTTGAATGAGGTAATATGACTCATTTTTTTTTTTTTTTTTGGCGATCCTAGGGCGATCA	2.56	0.12	0.55
356	GGGGACCAGGTGCCGTAAGCACAGCATGGAGTCTTCTCAAACCAGTGGTGCTGCCGCCGCCACTCCTGCCGCCGCTACCTTTTTTTTTTTTTTTGGCTCTGCTCCAATGACTCATTTTTTTTTTTTTTTTTAGCGATCCTAGGGCGATCA	1.02	0.06	0.7
357	GGGGACCAGGTGCCGTAAGGCTGCCCAAGGTCTAGAAGATCTTAATGTACAGCTTCACATCTACAATACAATGGAAGTTTTTTTTTTTTTTTTTAATGATAGTTTGATGACTCATCTTTTTTTTTTTTTTTCGCGATCCTAGGGCGATCA	3.13	0.05	0.57
358	GGGGACCAGGTGCCGTAAGTTTAAACCTCGGTCACTGATGAAGTAATTGCGGAGCTTCCTGAGGAATTGCTAAAAAATATTTTTTTTTTTTTTTAAGGTAGTACGCATGACTCATCTTTTTTTTTTTTTTTTGCGATCCTAGGGCGATCA	2.16	0.09	0.43
359	GGGGACCAGGTGCCGTAAGTGCCTTTTGGCCTTGCAAGAATCTGTCGAAGCCTACTTAGTCTCTTTATTTGAAGATACCTTTTTTTTTTTTTTTCACGCCAAGCGTATGACTCATCTTTTTTTTTTTTTTTAGCGATCCTAGGGCGATCA	4.03	0.08	0.71
360	GGGGACCAGGTGCCGTAAGCCAAAATGTGGTATGCGAAGGCTATATCACTTGGGGTGAATGCAGCAGTTATTCATGATGTTTTTTTTTTTTTTTTTGCTGCGGGAAATGACTCATTTTTTTTTTTTTTTTTTGCGATCCTAGGGCGATCA	1.22	0.1	0.45
361	GGGGACCAGGTGCCGTAAGACCTCAGCCACCTTTAATGATCACATTCCATCACTTGCGCTTTGGATCTGCCTGCATTATTTTTTTTTTTTTTTTTGCGTTACCCCCATGACTCATATTTTTTTTTTTTTTTTGCGATCCTAGGGCGATCA	1.32	0.07	0.69
362	GGGGACCAGGTGCCGTAAGCGGGTGAGATTTGATGGTCATCGAATAGAAGATTCCTAAGCCCTTTTCTTTTTACTCAAGTTTTTTTTTTTTTTTCGTGTTTTTTCTATGACTCATGTTTTTTTTTTTTTTTAGCGATCCTAGGGCGATCA	1.93	0.06	0.27
363	GGGGACCAGGTGCCGTAAGGCGGACTTAGGCGGAGGTTTGAGTTCTCTACGCCGAGAGTACACTGCCGTAATATCACAATTTTTTTTTTTTTTTTTACAGTACGTTATGACTCATATTTTTTTTTTTTTTTCGCGATCCTAGGGCGATCA	3.96	0.17	0.72
364	GGGGACCAGGTGCCGTAAGACTCTGGTCCTTTCATGAAAATTGGATTACCCGGAGTGATGATTTTCTCACAGTGATTTTTTTTTTTTTTTTTTTATAGCAAATGAAATGACTCATGTTTTTTTTTTTTTTTGGCGATCCTAGGGCGATCA	1.2	0.09	0.56
365	GGGGACCAGGTGCCGTAAGGATTAGGGACGATGATTTATTAAAGTATTTTTGATACTATTAATGCTGCCTTGATTATCATTTTTTTTTTTTTTTCACCTTGAAAAAATGACTCATATTTTTTTTTTTTTTTAGCGATCCTAGGGCGATCA	1.75	0.66	0.45
366	GGGGACCAGGTGCCGTAAGGCAGGGTGGCGAAAAAAATAGTTAGGACACTGATATCAATAATATAGGGAATTTGAATTATTTTTTTTTTTTTTTTAGGTTAAGGGAATGACTCATATTTTTTTTTTTTTTTAGCGATCCTAGGGCGATCA	NaN	NaN	0.41
367	GGGGACCAGGTGCCGTAAGGAAACGACTTCCATGTTGGGGCATAATCTGGGTTAACTCGAATTGACAAGTATATAGTCATTTTTTTTTTTTTTTGTACGTAACATTATGACTCATTTTTTTTTTTTTTTTTTGCGATCCTAGGGCGATCA	2.71	0.11	0.49
368	GGGGACCAGGTGCCGTAAGGGTTCTTGACAATACCGTAATGAATTATTAAATTATTAAATTCTTCGTCTTTTTACAATATTTTTTTTTTTTTTTGGAGTTTAACAAATGACTCATTTTTTTTTTTTTTTTTTGCGATCCTAGGGCGATCA	1.85	0.52	0.22
369	GGGGACCAGGTGCCGTAAGATCAATCCTCCAACTTCGTATATCAATATTTTTACCTCTTCTATTTCCTGAAAAATTTGTTTTTTTTTTTTTTTTGTTTACGTTTTTATGACTCATCTTTTTTTTTTTTTTTAGCGATCCTAGGGCGATCA	3.39	0.36	0.33
370	GGGGACCAGGTGCCGTAAGCAGTCTCGCCTAGATTTCAAGATGACAGTTACTTTCGTTCCGAATGACTAGCGCTTGAAATTTTTTTTTTTTTTTTCCATATTCAATATGACTCATATTTTTTTTTTTTTTTTGCGATCCTAGGGCGATCA	2.71	0.11	0.68
371	GGGGACCAGGTGCCGTAAGCGCATTCAGGAGATTGTATTTCGGGTGCACCTATCTATCAATATTCTTGGCTCTTAAGTTTTTTTTTTTTTTTTTTTCTTTTCTCGTATGACTCATATTTTTTTTTTTTTTTGGCGATCCTAGGGCGATCA	3.38	0.07	0.42
372	GGGGACCAGGTGCCGTAAGGGCCTTAGGTAGTGAGCAGGAAACTACATAATATACTTTAATAACCTCAGGTAGGATAAATTTTTTTTTTTTTTTTTACCCGAGGAGATGACTCATCTTTTTTTTTTTTTTTGGCGATCCTAGGGCGATCA	3.2	0.12	0.58
373	GGGGACCAGGTGCCGTAAGTACCTCTTAGAGAAAAAAATTAAAAACAAAATAAAAAAAAAAAGAAACTTGCGGCTCTTCTTTTTTTTTTTTTTTAAAGTATTAGGAATGACTCATATTTTTTTTTTTTTTTAGCGATCCTAGGGCGATCA	NaN	NaN	NaN
374	GGGGACCAGGTGCCGTAAGACGTATGAGAGTCTAGGAATCCCCATAATGGAATCTATATTTCTATATACCAATATTACGTTTTTTTTTTTTTTTGTTTTATATGTTATGACTCATTTTTTTTTTTTTTTTTCGCGATCCTAGGGCGATCA	2.7	0.15	0.49
375	GGGGACCAGGTGCCGTAAGCCCATTCGTATGGTAGAATATGAAGGCTTTGAGTGCTGATCTAAGATCAGCTTACGCAAATTTTTTTTTTTTTTTGCGATTGGAGCCATGACTCATGTTTTTTTTTTTTTTTTGCGATCCTAGGGCGATCA	1.2	0.1	0.5
376	GGGGACCAGGTGCCGTAAGGACCCTATTGTGTCTGGACGGACTATGGTAACTACTTTTTGCGTTTTTGCACCTTCTTCCTTTTTTTTTTTTTTTAGTAGTGCACTTATGACTCATTTTTTTTTTTTTTTTTGGCGATCCTAGGGCGATCA	2.33	0.09	0.65
377	GGGGACCAGGTGCCGTAAGGTTCTCGCCATTCACGTCGCTCCGCACGTAAATCCCTATTACGGAAATTATTTCTCAATATTTTTTTTTTTTTTTATTGTTTTTTCCATGACTCATATTTTTTTTTTTTTTTAGCGATCCTAGGGCGATCA	1.17	0.06	0.4
378	GGGGACCAGGTGCCGTAAGCAAGAATCATTTGTTTTGATATTGTTTAGGACCAGCAGTTTCTGAGAGTTTAGCAAATGCTTTTTTTTTTTTTTTCTCAACTTTTGGATGACTCATTTTTTTTTTTTTTTTTAGCGATCCTAGGGCGATCA	1.93	0.17	0.52
379	GGGGACCAGGTGCCGTAAGCATACGGGAGACAGTGATATTCGATTTATGCCGCTTCAATTGTGCTTAAATCGTTGCATCTTTTTTTTTTTTTTTAATTGTAATGATATGACTCATCTTTTTTTTTTTTTTTTGCGATCCTAGGGCGATCA	3.69	0.12	0.68
380	GGGGACCAGGTGCCGTAAGGTAACGGTATGCAACATTTACTATCATCTTGTGCCAAAAAGTGACCTTATGTCCGCATGTTTTTTTTTTTTTTTTGCTAAGCTATTTATGACTCATCTTTTTTTTTTTTTTTTGCGATCCTAGGGCGATCA	3.11	0.11	0.45
381	GGGGACCAGGTGCCGTAAGTTCTGAAGGGTAGAGCTTGACGGGGAAAGCCGGCGAACGTGGCGAGAAAGGAAGGGAAGAAAGCGTTTTCATTTTTTTTTTTCCACCTAGCGGATGACTCATTTTTTTTCTTAGCGATCCTAGGGCGATCA	1.83	0.31	1.2
382	GGGGACCAGGTGCCGTAAGGGTCTTCTATTAGAGCTTGACGGGGAAAGCCGGCGAACGTGGCGAGAAAGGAAGGGAAGAAAGCGTTTTCATTTTTTTTTTTCCACCTAGCGGAAGACTCATTTTTTTTCTTAGCGATCCTAGGGCGATCA	NaN	NaN	0.73
383	GGGGACCAGGTGCCGTAAGTAGCCTAAATTAGAGCTTGACGGGGAAAGCCGGCGAACGTGGCGAGAAAGGAAGGGAAGAAAGCGTTTTCATTTTTTTTTTTCCACCTAGCGGAGGACTCATTTTTTTTCTTAGCGATCCTAGGGCGATCA	0.24	0.19	0.9
384	GGGGACCAGGTGCCGTAAGGTCTCAACGCTAGAGCTTGACGGGGAAAGCCGGCGAACGTGGCGAGAAAGGAAGGGAAGAAAGCGTTTTCATTTTTTTTTTTCCACCTAGCGGACGACTCATTTTTTTTCTTAGCGATCCTAGGGCGATCA	0.1	0.06	0.9
385	GGGGACCAGGTGCCGTAAGGTGCGGTCTGTAGAGCTTGACGGGGAAAGCCGGCGAACGTGGCGAGAAAGGAAGGGAAGAAAGCGTTTTCATTTTTTTTTTTCCACCTAGCGGATCACTCATTTTTTTTCTTAGCGATCCTAGGGCGATCA	NaN	NaN	1.11
386	GGGGACCAGGTGCCGTAAGTGTGTCACCGTAGAGCTTGACGGGGAAAGCCGGCGAACGTGGCGAGAAAGGAAGGGAAGAAAGCGTTTTCATTTTTTTTTTTCCACCTAGCGGATTACTCATTTTTTTTCTTAGCGATCCTAGGGCGATCA	NaN	0.21	0.69
387	GGGGACCAGGTGCCGTAAGTTAGGTTCGATAGAGCTTGACGGGGAAAGCCGGCGAACGTGGCGAGAAAGGAAGGGAAGAAAGCGTTTTCATTTTTTTTTTTCCACCTAGCGGATAACTCATTTTTTTTCTTAGCGATCCTAGGGCGATCA	0.2	0.14	1.05
388	GGGGACCAGGTGCCGTAAGATCGGACAGGTAGAGCTTGACGGGGAAAGCCGGCGAACGTGGCGAGAAAGGAAGGGAAGAAAGCGTTTTCATTTTTTTTTTTCCACCTAGCGGATGCCTCATTTTTTTTCTTAGCGATCCTAGGGCGATCA	0.33	0.32	1.16
389	GGGGACCAGGTGCCGTAAGCATTAGGATATAGAGCTTGACGGGGAAAGCCGGCGAACGTGGCGAGAAAGGAAGGGAAGAAAGCGTTTTCATTTTTTTTTTTCCACCTAGCGGATGTCTCATTTTTTTTCTTAGCGATCCTAGGGCGATCA	NaN	0.4	0.7
390	GGGGACCAGGTGCCGTAAGTCATATTGCGTAGAGCTTGACGGGGAAAGCCGGCGAACGTGGCGAGAAAGGAAGGGAAGAAAGCGTTTTCATTTTTTTTTTTCCACCTAGCGGATGGCTCATTTTTTTTCTTAGCGATCCTAGGGCGATCA	0.21	0.07	0.96
391	GGGGACCAGGTGCCGTAAGATGACTATCCTAGAGCTTGACGGGGAAAGCCGGCGAACGTGGCGAGAAAGGAAGGGAAGAAAGCGTTTTCATTTTTTTTTTTCCACCTAGCGGATGAATCATTTTTTTTCTTAGCGATCCTAGGGCGATCA	NaN	NaN	0.77
392	GGGGACCAGGTGCCGTAAGGAAGTACTGTTAGAGCTTGACGGGGAAAGCCGGCGAACGTGGCGAGAAAGGAAGGGAAGAAAGCGTTTTCATTTTTTTTTTTCCACCTAGCGGATGATTCATTTTTTTTCTTAGCGATCCTAGGGCGATCA	NaN	0.11	0.86
393	GGGGACCAGGTGCCGTAAGCTATTTTGCCTAGAGCTTGACGGGGAAAGCCGGCGAACGTGGCGAGAAAGGAAGGGAAGAAAGCGTTTTCATTTTTTTTTTTCCACCTAGCGGATGAGTCATTTTTTTTCTTAGCGATCCTAGGGCGATCA	2.05	0.09	0.86
394	GGGGACCAGGTGCCGTAAGAGTCTCAAAATAGAGCTTGACGGGGAAAGCCGGCGAACGTGGCGAGAAAGGAAGGGAAGAAAGCGTTTTCATTTTTTTTTTTCCACCTAGCGGATGACCCATTTTTTTTCTTAGCGATCCTAGGGCGATCA	0.3	0.12	1.09
395	GGGGACCAGGTGCCGTAAGCAATTCAACGTAGAGCTTGACGGGGAAAGCCGGCGAACGTGGCGAGAAAGGAAGGGAAGAAAGCGTTTTCATTTTTTTTTTTCCACCTAGCGGATGACACATTTTTTTTCTTAGCGATCCTAGGGCGATCA	0.21	0.69	1.02
396	GGGGACCAGGTGCCGTAAGTAACGAGGCATAGAGCTTGACGGGGAAAGCCGGCGAACGTGGCGAGAAAGGAAGGGAAGAAAGCGTTTTCATTTTTTTTTTTCCACCTAGCGGATGACGCATTTTTTTTCTTAGCGATCCTAGGGCGATCA	0.21	0.15	0.95
397	GGGGACCAGGTGCCGTAAGGACAGTACTGTAGAGCTTGACGGGGAAAGCCGGCGAACGTGGCGAGAAAGGAAGGGAAGAAAGCGTTTTCATTTTTTTTTTTCCACCTAGCGGATGACTGATTTTTTTTCTTAGCGATCCTAGGGCGATCA	0.18	0.15	0.96
398	GGGGACCAGGTGCCGTAAGTCCTGACCGGTAGAGCTTGACGGGGAAAGCCGGCGAACGTGGCGAGAAAGGAAGGGAAGAAAGCGTTTTCATTTTTTTTTTTCCACCTAGCGGATGACTAATTTTTTTTCTTAGCGATCCTAGGGCGATCA	0.14	0.15	0.88
399	GGGGACCAGGTGCCGTAAGCAAGAGCGCCTAGAGCTTGACGGGGAAAGCCGGCGAACGTGGCGAGAAAGGAAGGGAAGAAAGCGTTTTCATTTTTTTTTTTCCACCTAGCGGATGACTTATTTTTTTTCTTAGCGATCCTAGGGCGATCA	NaN	0.05	1.08
400	GGGGACCAGGTGCCGTAAGCAAGATTCTATAGAGCTTGACGGGGAAAGCCGGCGAACGTGGCGAGAAAGGAAGGGAAGAAAGCGTTTTCATTTTTTTTTTTCCACCTAGCGGATGACTCGTTTTTTTTCTTAGCGATCCTAGGGCGATCA	0.2	0.3	0.95
401	GGGGACCAGGTGCCGTAAGTACTCCCGGGTAGAGCTTGACGGGGAAAGCCGGCGAACGTGGCGAGAAAGGAAGGGAAGAAAGCGTTTTCATTTTTTTTTTTCCACCTAGCGGATGACTCCTTTTTTTTCTTAGCGATCCTAGGGCGATCA	NaN	0.23	1.22
402	GGGGACCAGGTGCCGTAAGCATACTTGGTTAGAGCTTGACGGGGAAAGCCGGCGAACGTGGCGAGAAAGGAAGGGAAGAAAGCGTTTTCATTTTTTTTTTTCCACCTAGCGGACCACTCATTTTTTTTCTTAGCGATCCTAGGGCGATCA	0.27	0.14	0.94
403	GGGGACCAGGTGCCGTAAGCCCATACTGTTAGAGCTTGACGGGGAAAGCCGGCGAACGTGGCGAGAAAGGAAGGGAAGAAAGCGTTTTCATTTTTTTTTTTCCACCTAGCGGAAAACTCATTTTTTTTCTTAGCGATCCTAGGGCGATCA	NaN	NaN	0.87
404	GGGGACCAGGTGCCGTAAGCGAGAACCCTTAGAGCTTGACGGGGAAAGCCGGCGAACGTGGCGAGAAAGGAAGGGAAGAAAGCGTTTTCATTTTTTTTTTTCCACCTAGCGGACGTCTCATTTTTTTTCTTAGCGATCCTAGGGCGATCA	0.07	0.09	0.98
405	GGGGACCAGGTGCCGTAAGGGATACCACGTAGAGCTTGACGGGGAAAGCCGGCGAACGTGGCGAGAAAGGAAGGGAAGAAAGCGTTTTCATTTTTTTTTTTCCACCTAGCGGAGGCCTCATTTTTTTTCTTAGCGATCCTAGGGCGATCA	0.1	0.23	1.04
406	GGGGACCAGGTGCCGTAAGGAGTTAATCATAGAGCTTGACGGGGAAAGCCGGCGAACGTGGCGAGAAAGGAAGGGAAGAAAGCGTTTTCATTTTTTTTTTTCCACCTAGCGGACGAGTCATTTTTTTTCTTAGCGATCCTAGGGCGATCA	0.36	0.2	1.15
407	GGGGACCAGGTGCCGTAAGGATCGGCGTCTAGAGCTTGACGGGGAAAGCCGGCGAACGTGGCGAGAAAGGAAGGGAAGAAAGCGTTTTCATTTTTTTTTTTCCACCTAGCGGAGGAGTCATTTTTTTTCTTAGCGATCCTAGGGCGATCA	NaN	NaN	0.99
408	GGGGACCAGGTGCCGTAAGCCTTAAGACCTAGAGCTTGACGGGGAAAGCCGGCGAACGTGGCGAGAAAGGAAGGGAAGAAAGCGTTTTCATTTTTTTTTTTCCACCTAGCGGAGGACGCATTTTTTTTCTTAGCGATCCTAGGGCGATCA	0.27	0.11	0.97
409	GGGGACCAGGTGCCGTAAGGGATTTGTGATAGAGCTTGACGGGGAAAGCCGGCGAACGTGGCGAGAAAGGAAGGGAAGAAAGCGTTTTCATTTTTTTTTTTCCACCTAGCGGAGGACACATTTTTTTTCTTAGCGATCCTAGGGCGATCA	0.2	0.09	0.84
410	GGGGACCAGGTGCCGTAAGGGGTCACCGATAGAGCTTGACGGGGAAAGCCGGCGAACGTGGCGAGAAAGGAAGGGAAGAAAGCGTTTTCATTTTTTTTTTTCCACCTAGCGGAGGACTAATTTTTTTTCTTAGCGATCCTAGGGCGATCA	NaN	NaN	1.16
411	GGGGACCAGGTGCCGTAAGTCGATATCGTTAGAGCTTGACGGGGAAAGCCGGCGAACGTGGCGAGAAAGGAAGGGAAGAAAGCGTTTTCATTTTTTTTTTTCCACCTAGCGGAGGACTTATTTTTTTTCTTAGCGATCCTAGGGCGATCA	0.13	0.05	1.02
412	GGGGACCAGGTGCCGTAAGCAGGGCTCTATAGAGCTTGACGGGGAAAGCCGGCGAACGTGGCGAGAAAGGAAGGGAAGAAAGCGTTTTCATTTTTTTTTTTCCACCTAGCGGAAGACTCCTTTTTTTTCTTAGCGATCCTAGGGCGATCA	0.12	NaN	1.04
413	GGGGACCAGGTGCCGTAAGTGCAGCTACCTAGAGCTTGACGGGGAAAGCCGGCGAACGTGGCGAGAAAGGAAGGGAAGAAAGCGTTTTCATTTTTTTTTTTCCACCTAGCGGACGACTCGTTTTTTTTCTTAGCGATCCTAGGGCGATCA	0.08	0.08	0.9
414	GGGGACCAGGTGCCGTAAGTTGGACTATCTAGAGCTTGACGGGGAAAGCCGGCGAACGTGGCGAGAAAGGAAGGGAAGAAAGCGTTTTCATTTTTTTTTTTCCACCTAGCGGATTCCTCATTTTTTTTCTTAGCGATCCTAGGGCGATCA	0.21	0.1	0.88
415	GGGGACCAGGTGCCGTAAGGCACTCTCACTAGAGCTTGACGGGGAAAGCCGGCGAACGTGGCGAGAAAGGAAGGGAAGAAAGCGTTTTCATTTTTTTTTTTCCACCTAGCGGATCTCTCATTTTTTTTCTTAGCGATCCTAGGGCGATCA	NaN	NaN	NaN
416	GGGGACCAGGTGCCGTAAGCAAAATCTAATAGAGCTTGACGGGGAAAGCCGGCGAACGTGGCGAGAAAGGAAGGGAAGAAAGCGTTTTCATTTTTTTTTTTCCACCTAGCGGATCATTCATTTTTTTTCTTAGCGATCCTAGGGCGATCA	NaN	NaN	1.07
417	GGGGACCAGGTGCCGTAAGGACGGCTCTTTAGAGCTTGACGGGGAAAGCCGGCGAACGTGGCGAGAAAGGAAGGGAAGAAAGCGTTTTCATTTTTTTTTTTCCACCTAGCGGATTAATCATTTTTTTTCTTAGCGATCCTAGGGCGATCA	NaN	NaN	0.83
418	GGGGACCAGGTGCCGTAAGCCGGTGAAGCTAGAGCTTGACGGGGAAAGCCGGCGAACGTGGCGAGAAAGGAAGGGAAGAAAGCGTTTTCATTTTTTTTTTTCCACCTAGCGGATAACCCATTTTTTTTCTTAGCGATCCTAGGGCGATCA	NaN	NaN	0.99
419	GGGGACCAGGTGCCGTAAGGTCCCACTCATAGAGCTTGACGGGGAAAGCCGGCGAACGTGGCGAGAAAGGAAGGGAAGAAAGCGTTTTCATTTTTTTTTTTCCACCTAGCGGATTACCCATTTTTTTTCTTAGCGATCCTAGGGCGATCA	NaN	0.1	1.03
420	GGGGACCAGGTGCCGTAAGCCAACGATCTTAGAGCTTGACGGGGAAAGCCGGCGAACGTGGCGAGAAAGGAAGGGAAGAAAGCGTTTTCATTTTTTTTTTTCCACCTAGCGGATCACTGATTTTTTTTCTTAGCGATCCTAGGGCGATCA	NaN	0.1	0.86
421	GGGGACCAGGTGCCGTAAGGTCTACAAACTAGAGCTTGACGGGGAAAGCCGGCGAACGTGGCGAGAAAGGAAGGGAAGAAAGCGTTTTCATTTTTTTTTTTCCACCTAGCGGATTACTGATTTTTTTTCTTAGCGATCCTAGGGCGATCA	NaN	0.12	0.97
422	GGGGACCAGGTGCCGTAAGGGTCATGACGTAGAGCTTGACGGGGAAAGCCGGCGAACGTGGCGAGAAAGGAAGGGAAGAAAGCGTTTTCATTTTTTTTTTTCCACCTAGCGGATAACTCCTTTTTTTTCTTAGCGATCCTAGGGCGATCA	NaN	0.19	1.01
423	GGGGACCAGGTGCCGTAAGACGCCCGTTTTAGAGCTTGACGGGGAAAGCCGGCGAACGTGGCGAGAAAGGAAGGGAAGAAAGCGTTTTCATTTTTTTTTTTCCACCTAGCGGATAACTCTTTTTTTTTCTTAGCGATCCTAGGGCGATCA	NaN	0.11	0.95
424	GGGGACCAGGTGCCGTAAGGCATACATTCTAGAGCTTGACGGGGAAAGCCGGCGAACGTGGCGAGAAAGGAAGGGAAGAAAGCGTTTTCATTTTTTTTTTTCCACCTAGCGGATGCATCATTTTTTTTCTTAGCGATCCTAGGGCGATCA	0.14	0.16	0.93
425	GGGGACCAGGTGCCGTAAGGATCTTACGGTAGAGCTTGACGGGGAAAGCCGGCGAACGTGGCGAGAAAGGAAGGGAAGAAAGCGTTTTCATTTTTTTTTTTCCACCTAGCGGATGCGTCATTTTTTTTCTTAGCGATCCTAGGGCGATCA	0.22	0.1	0.93
426	GGGGACCAGGTGCCGTAAGGTGAAGGGCTTAGAGCTTGACGGGGAAAGCCGGCGAACGTGGCGAGAAAGGAAGGGAAGAAAGCGTTTTCATTTTTTTTTTTCCACCTAGCGGATGCCCCATTTTTTTTCTTAGCGATCCTAGGGCGATCA	0.1	0.12	1.16
427	GGGGACCAGGTGCCGTAAGAACCTTCTTGTAGAGCTTGACGGGGAAAGCCGGCGAACGTGGCGAGAAAGGAAGGGAAGAAAGCGTTTTCATTTTTTTTTTTCCACCTAGCGGATGCCACATTTTTTTTCTTAGCGATCCTAGGGCGATCA	0.21	0.12	1.14
428	GGGGACCAGGTGCCGTAAGGGCCGTGTCATAGAGCTTGACGGGGAAAGCCGGCGAACGTGGCGAGAAAGGAAGGGAAGAAAGCGTTTTCATTTTTTTTTTTCCACCTAGCGGATGCCTAATTTTTTTTCTTAGCGATCCTAGGGCGATCA	0.08	0.13	1.07
429	GGGGACCAGGTGCCGTAAGAAACACTGCTTAGAGCTTGACGGGGAAAGCCGGCGAACGTGGCGAGAAAGGAAGGGAAGAAAGCGTTTTCATTTTTTTTTTTCCACCTAGCGGATGTCTAATTTTTTTTCTTAGCGATCCTAGGGCGATCA	NaN	0.1	0.88
430	GGGGACCAGGTGCCGTAAGAAAGACCGGGTAGAGCTTGACGGGGAAAGCCGGCGAACGTGGCGAGAAAGGAAGGGAAGAAAGCGTTTTCATTTTTTTTTTTCCACCTAGCGGATGGCTCTTTTTTTTTCTTAGCGATCCTAGGGCGATCA	NaN	0.23	1.26
431	GGGGACCAGGTGCCGTAAGGCCGTGAACCTAGAGCTTGACGGGGAAAGCCGGCGAACGTGGCGAGAAAGGAAGGGAAGAAAGCGTTTTCATTTTTTTTTTTCCACCTAGCGGATGTCTCGTTTTTTTTCTTAGCGATCCTAGGGCGATCA	0.2	0.15	0.79
432	GGGGACCAGGTGCCGTAAGGAGTCATGGATAGAGCTTGACGGGGAAAGCCGGCGAACGTGGCGAGAAAGGAAGGGAAGAAAGCGTTTTCATTTTTTTTTTTCCACCTAGCGGATGAAACATTTTTTTTCTTAGCGATCCTAGGGCGATCA	NaN	NaN	0.84
433	GGGGACCAGGTGCCGTAAGGACTCTGTACTAGAGCTTGACGGGGAAAGCCGGCGAACGTGGCGAGAAAGGAAGGGAAGAAAGCGTTTTCATTTTTTTTTTTCCACCTAGCGGATGAAGCATTTTTTTTCTTAGCGATCCTAGGGCGATCA	NaN	0.09	0.86
434	GGGGACCAGGTGCCGTAAGATCGTCACGCTAGAGCTTGACGGGGAAAGCCGGCGAACGTGGCGAGAAAGGAAGGGAAGAAAGCGTTTTCATTTTTTTTTTTCCACCTAGCGGATGATTAATTTTTTTTCTTAGCGATCCTAGGGCGATCA	NaN	0.37	0.94
435	GGGGACCAGGTGCCGTAAGGAACTAAATCTAGAGCTTGACGGGGAAAGCCGGCGAACGTGGCGAGAAAGGAAGGGAAGAAAGCGTTTTCATTTTTTTTTTTCCACCTAGCGGATGATTTATTTTTTTTCTTAGCGATCCTAGGGCGATCA	NaN	0.58	0.67
436	GGGGACCAGGTGCCGTAAGGAACAGCGATTAGAGCTTGACGGGGAAAGCCGGCGAACGTGGCGAGAAAGGAAGGGAAGAAAGCGTTTTCATTTTTTTTTTTCCACCTAGCGGATGAGTCTTTTTTTTTCTTAGCGATCCTAGGGCGATCA	NaN	0.15	1.04
437	GGGGACCAGGTGCCGTAAGCAAGAGTTCGTAGAGCTTGACGGGGAAAGCCGGCGAACGTGGCGAGAAAGGAAGGGAAGAAAGCGTTTTCATTTTTTTTTTTCCACCTAGCGGATGAATCGTTTTTTTTCTTAGCGATCCTAGGGCGATCA	0.12	0.13	1.02
438	GGGGACCAGGTGCCGTAAGCAGCTGCTTGTAGAGCTTGACGGGGAAAGCCGGCGAACGTGGCGAGAAAGGAAGGGAAGAAAGCGTTTTCATTTTTTTTTTTCCACCTAGCGGATGACCTATTTTTTTTCTTAGCGATCCTAGGGCGATCA	0.38	0.1	1
439	GGGGACCAGGTGCCGTAAGCCACTTTAGATAGAGCTTGACGGGGAAAGCCGGCGAACGTGGCGAGAAAGGAAGGGAAGAAAGCGTTTTCATTTTTTTTTTTCCACCTAGCGGATGACATATTTTTTTTCTTAGCGATCCTAGGGCGATCA	0.19	0.03	0.78
440	GGGGACCAGGTGCCGTAAGGAACCAGGGCTAGAGCTTGACGGGGAAAGCCGGCGAACGTGGCGAGAAAGGAAGGGAAGAAAGCGTTTTCATTTTTTTTTTTCCACCTAGCGGATGACCCTTTTTTTTTCTTAGCGATCCTAGGGCGATCA	0.13	0.06	0.85
441	GGGGACCAGGTGCCGTAAGAAGACACTTGTAGAGCTTGACGGGGAAAGCCGGCGAACGTGGCGAGAAAGGAAGGGAAGAAAGCGTTTTCATTTTTTTTTTTCCACCTAGCGGATGACACGTTTTTTTTCTTAGCGATCCTAGGGCGATCA	0.16	0.17	0.83
442	GGGGACCAGGTGCCGTAAGAGACGCCCGGTAGAGCTTGACGGGGAAAGCCGGCGAACGTGGCGAGAAAGGAAGGGAAGAAAGCGTTTTCATTTTTTTTTTTCCACCTAGCGGATGACTATTTTTTTTTCTTAGCGATCCTAGGGCGATCA	NaN	NaN	1.05
443	GGGGACCAGGTGCCGTAAGTGTCACCAAGTAGAGCTTGACGGGGAAAGCCGGCGAACGTGGCGAGAAAGGAAGGGAAGAAAGCGTTTTCATTTTTTTTTTTCCACCTAGCGGATGACTACTTTTTTTTCTTAGCGATCCTAGGGCGATCA	0.16	0.16	0.89
444	GGGGACCAGGTGCCGTAAGAGTTAGCGGTTAGAGCTTGACGGGGAAAGCCGGCGAACGTGGCGAGAAAGGAAGGGAAGAAAGCGTTTTCATTTTTTTTTTTCCACCTAGCGGATAACGCTTTTTTTTTCTTAGCGATCCTAGGGCGATCA	0.15	0.05	1.05
445	GGGGACCAGGTGCCGTAAGACCGTCCGGCTAGAGCTTGACGGGGAAAGCCGGCGAACGTGGCGAGAAAGGAAGGGAAGAAAGCGTTTTCATTTTTTTTTTTCCACCTAGCGGATGAGACCTTTTTTTTCTTAGCGATCCTAGGGCGATCA	0.1	0.14	0.94
446	GGGGACCAGGTGCCGTAAGTCTATGTCTGTAGAGCTTGACGGGGAAAGCCGGCGAACGTGGCGAGAAAGGAAGGGAAGAAAGCGTTTTCATTTTTTTTTTTCCACCTAGCGGATGGCTGGTTTTTTTTCTTAGCGATCCTAGGGCGATCA	0.23	0.1	0.99
447	GGGGACCAGGTGCCGTAAGATGGGTAGCCTAGAGCTTGACGGGGAAAGCCGGCGAACGTGGCGAGAAAGGAAGGGAAGAAAGCGTTTTCATTTTTTTTTTTCCACCTAGCGGATAAGTGATTTTTTTTCTTAGCGATCCTAGGGCGATCA	NaN	NaN	0.85
448	GGGGACCAGGTGCCGTAAGAAGTGCGCCCTAGAGCTTGACGGGGAAAGCCGGCGAACGTGGCGAGAAAGGAAGGGAAGAAAGCGTTTTCATTTTTTTTTTTCCACCTAGCGGATGGATGATTTTTTTTCTTAGCGATCCTAGGGCGATCA	0.08	0.09	0.82
449	GGGGACCAGGTGCCGTAAGGACGAGATTATAGAGCTTGACGGGGAAAGCCGGCGAACGTGGCGAGAAAGGAAGGGAAGAAAGCGTTTTCATTTTTTTTTTTCCACCTAGCGGATAATTCTTTTTTTTTCTTAGCGATCCTAGGGCGATCA	NaN	NaN	0.77
450	GGGGACCAGGTGCCGTAAGAGAGGCGCGCTAGAGCTTGACGGGGAAAGCCGGCGAACGTGGCGAGAAAGGAAGGGAAGAAAGCGTTTTCATTTTTTTTTTTCCACCTAGCGGATGTATCCTTTTTTTTCTTAGCGATCCTAGGGCGATCA	NaN	NaN	0.61
451	GGGGACCAGGTGCCGTAAGTATCGACTCATAGAGCTTGACGGGGAAAGCCGGCGAACGTGGCGAGAAAGGAAGGGAAGAAAGCGTTTTCATTTTTTTTTTTCCACCTAGCGGATACATCATTTTTTTTCTTAGCGATCCTAGGGCGATCA	0.16	0.06	0.78
452	GGGGACCAGGTGCCGTAAGCCGTTAGTATTAGAGCTTGACGGGGAAAGCCGGCGAACGTGGCGAGAAAGGAAGGGAAGAAAGCGTTTTCATTTTTTTTTTTCCACCTAGCGGACGTCACATTTTTTTTCTTAGCGATCCTAGGGCGATCA	0.14	0.15	0.95
453	GGGGACCAGGTGCCGTAAGCTTTGCGAGATAGAGCTTGACGGGGAAAGCCGGCGAACGTGGCGAGAAAGGAAGGGAAGAAAGCGTTTTCATTTTTTTTTTTCCACCTAGCGGAGTACTAATTTTTTTTCTTAGCGATCCTAGGGCGATCA	NaN	0.21	0.84
454	GGGGACCAGGTGCCGTAAGTCTGGGTTCATAGAGCTTGACGGGGAAAGCCGGCGAACGTGGCGAGAAAGGAAGGGAAGAAAGCGTTTTCATTTTTTTTTTTCCACCTAGCGGGACGCAAATTTTTTTTCTTAGCGATCCTAGGGCGATCA	0.15	0.11	0.97
455	GGGGACCAGGTGCCGTAAGGGTGTGTTCATAGAGCTTGACGGGGAAAGCCGGCGAACGTGGCGAGAAAGGAAGGGAAGAAAGCGTTTTCATTTTTTTTTTTCCACCTAGCGGTACGCAAATTTTTTTTCTTAGCGATCCTAGGGCGATCA	0.23	0.17	1
456	GGGGACCAGGTGCCGTAAGATCCACCTCGTAGAGCTTGACGGGGAAAGCCGGCGAACGTGGCGAGAAAGGAAGGGAAGAAAGCGTTTTCATTTTTTTTTTTCCACCTAGCGGAACGCAAATTTTTTTTCTTAGCGATCCTAGGGCGATCA	0.08	0.11	1.12
457	GGGGACCAGGTGCCGTAAGGTAAGTCGCATAGAGCTTGACGGGGAAAGCCGGCGAACGTGGCGAGAAAGGAAGGGAAGAAAGCGTTTTCATTTTTTTTTTTCCACCTAGCGGCACGCAAATTTTTTTTCTTAGCGATCCTAGGGCGATCA	0.09	0.08	0.9
458	GGGGACCAGGTGCCGTAAGTCATAGATAGTAGAGCTTGACGGGGAAAGCCGGCGAACGTGGCGAGAAAGGAAGGGAAGAAAGCGTTTTCATTTTTTTTTTTCCACCTAGCGGGTCGCAAATTTTTTTTCTTAGCGATCCTAGGGCGATCA	0.13	0.08	0.86
459	GGGGACCAGGTGCCGTAAGCTTCTAACTCTAGAGCTTGACGGGGAAAGCCGGCGAACGTGGCGAGAAAGGAAGGGAAGAAAGCGTTTTCATTTTTTTTTTTCCACCTAGCGGGGCGCAAATTTTTTTTCTTAGCGATCCTAGGGCGATCA	0.15	0.13	0.96
460	GGGGACCAGGTGCCGTAAGTCGCAGGTGGTAGAGCTTGACGGGGAAAGCCGGCGAACGTGGCGAGAAAGGAAGGGAAGAAAGCGTTTTCATTTTTTTTTTTCCACCTAGCGGGCCGCAAATTTTTTTTCTTAGCGATCCTAGGGCGATCA	0.08	0.07	0.93
461	GGGGACCAGGTGCCGTAAGGATACAGAGTTAGAGCTTGACGGGGAAAGCCGGCGAACGTGGCGAGAAAGGAAGGGAAGAAAGCGTTTTCATTTTTTTTTTTCCACCTAGCGGGAGGCAAATTTTTTTTCTTAGCGATCCTAGGGCGATCA	0.14	0.18	0.9
462	GGGGACCAGGTGCCGTAAGGAATCCGATATAGAGCTTGACGGGGAAAGCCGGCGAACGTGGCGAGAAAGGAAGGGAAGAAAGCGTTTTCATTTTTTTTTTTCCACCTAGCGGGATGCAAATTTTTTTTCTTAGCGATCCTAGGGCGATCA	0.08	0.14	0.81
463	GGGGACCAGGTGCCGTAAGGACAATGCGTTAGAGCTTGACGGGGAAAGCCGGCGAACGTGGCGAGAAAGGAAGGGAAGAAAGCGTTTTCATTTTTTTTTTTCCACCTAGCGGGAAGCAAATTTTTTTTCTTAGCGATCCTAGGGCGATCA	NaN	0.15	1
464	GGGGACCAGGTGCCGTAAGGCCCGGTAACTAGAGCTTGACGGGGAAAGCCGGCGAACGTGGCGAGAAAGGAAGGGAAGAAAGCGTTTTCATTTTTTTTTTTCCACCTAGCGGGACACAAATTTTTTTTCTTAGCGATCCTAGGGCGATCA	0.09	0.07	0.79
465	GGGGACCAGGTGCCGTAAGGGTGGCTCACTAGAGCTTGACGGGGAAAGCCGGCGAACGTGGCGAGAAAGGAAGGGAAGAAAGCGTTTTCATTTTTTTTTTTCCACCTAGCGGGACCCAAATTTTTTTTCTTAGCGATCCTAGGGCGATCA	0.11	0.13	0.84
466	GGGGACCAGGTGCCGTAAGTCGCGTTAAATAGAGCTTGACGGGGAAAGCCGGCGAACGTGGCGAGAAAGGAAGGGAAGAAAGCGTTTTCATTTTTTTTTTTCCACCTAGCGGGACTCAAATTTTTTTTCTTAGCGATCCTAGGGCGATCA	0.21	0.53	1.03
467	GGGGACCAGGTGCCGTAAGCTTGCTTTTGTAGAGCTTGACGGGGAAAGCCGGCGAACGTGGCGAGAAAGGAAGGGAAGAAAGCGTTTTCATTTTTTTTTTTCCACCTAGCGGGACGTAAATTTTTTTTCTTAGCGATCCTAGGGCGATCA	0.13	0.13	0.85
468	GGGGACCAGGTGCCGTAAGCCTCTGAAAATAGAGCTTGACGGGGAAAGCCGGCGAACGTGGCGAGAAAGGAAGGGAAGAAAGCGTTTTCATTTTTTTTTTTCCACCTAGCGGGACGGAAATTTTTTTTCTTAGCGATCCTAGGGCGATCA	0.2	0.17	0.94
469	GGGGACCAGGTGCCGTAAGCATAGAGTGTTAGAGCTTGACGGGGAAAGCCGGCGAACGTGGCGAGAAAGGAAGGGAAGAAAGCGTTTTCATTTTTTTTTTTCCACCTAGCGGGACGAAAATTTTTTTTCTTAGCGATCCTAGGGCGATCA	0.13	0.09	0.91
470	GGGGACCAGGTGCCGTAAGAGGCCCTCAATAGAGCTTGACGGGGAAAGCCGGCGAACGTGGCGAGAAAGGAAGGGAAGAAAGCGTTTTCATTTTTTTTTTTCCACCTAGCGGGACGCTAATTTTTTTTCTTAGCGATCCTAGGGCGATCA	0.14	0.29	0.88
471	GGGGACCAGGTGCCGTAAGTTAGTCAACATAGAGCTTGACGGGGAAAGCCGGCGAACGTGGCGAGAAAGGAAGGGAAGAAAGCGTTTTCATTTTTTTTTTTCCACCTAGCGGGACGCCAATTTTTTTTCTTAGCGATCCTAGGGCGATCA	0.21	0.12	0.87
472	GGGGACCAGGTGCCGTAAGAGGCGGTAGATAGAGCTTGACGGGGAAAGCCGGCGAACGTGGCGAGAAAGGAAGGGAAGAAAGCGTTTTCATTTTTTTTTTTCCACCTAGCGGGACGCGAATTTTTTTTCTTAGCGATCCTAGGGCGATCA	0.11	0.11	0.92
473	GGGGACCAGGTGCCGTAAGATGAGGCATTTAGAGCTTGACGGGGAAAGCCGGCGAACGTGGCGAGAAAGGAAGGGAAGAAAGCGTTTTCATTTTTTTTTTTCCACCTAGCGGGACGCAGATTTTTTTTCTTAGCGATCCTAGGGCGATCA	0.23	0.13	0.94
474	GGGGACCAGGTGCCGTAAGAGCTCCTCACTAGAGCTTGACGGGGAAAGCCGGCGAACGTGGCGAGAAAGGAAGGGAAGAAAGCGTTTTCATTTTTTTTTTTCCACCTAGCGGGACGCATATTTTTTTTCTTAGCGATCCTAGGGCGATCA	0.09	0.12	0.91
475	GGGGACCAGGTGCCGTAAGCGTTGGGTACTAGAGCTTGACGGGGAAAGCCGGCGAACGTGGCGAGAAAGGAAGGGAAGAAAGCGTTTTCATTTTTTTTTTTCCACCTAGCGGGACGCACATTTTTTTTCTTAGCGATCCTAGGGCGATCA	0.1	0.09	0.93
476	GGGGACCAGGTGCCGTAAGGACTGTTACGTAGAGCTTGACGGGGAAAGCCGGCGAACGTGGCGAGAAAGGAAGGGAAGAAAGCGTTTTCATTTTTTTTTTTCCACCTAGCGGGACGCAACTTTTTTTTCTTAGCGATCCTAGGGCGATCA	0.17	0.16	0.95
477	GGGGACCAGGTGCCGTAAGAGAACCTTGCTAGAGCTTGACGGGGAAAGCCGGCGAACGTGGCGAGAAAGGAAGGGAAGAAAGCGTTTTCATTTTTTTTTTTCCACCTAGCGGGACGCAAGTTTTTTTTCTTAGCGATCCTAGGGCGATCA	0.13	0.09	1.11
478	GGGGACCAGGTGCCGTAAGGAACGTTGAATAGAGCTTGACGGGGAAAGCCGGCGAACGTGGCGAGAAAGGAAGGGAAGAAAGCGTTTTCATTTTTTTTTTTCCACCTAGCGGGACGCAATTTTTTTTTCTTAGCGATCCTAGGGCGATCA	0.1	0.31	0.94
479	GGGGACCAGGTGCCGTAAGCCAGTCGAAGTAGAGCTTGACGGGGAAAGCCGGCGAACGTGGCGAGAAAGGAAGGGAAGAAAGCGTTTTCATTTTTTTTTTTCCACCTAGCGGCTCGCAAATTTTTTTTCTTAGCGATCCTAGGGCGATCA	0.08	0.16	0.87
480	GGGGACCAGGTGCCGTAAGGGTCCCTTGGTAGAGCTTGACGGGGAAAGCCGGCGAACGTGGCGAGAAAGGAAGGGAAGAAAGCGTTTTCATTTTTTTTTTTCCACCTAGCGGATCGCAAATTTTTTTTCTTAGCGATCCTAGGGCGATCA	0.09	0.16	1.07
481	GGGGACCAGGTGCCGTAAGCATTAAGAATTAGAGCTTGACGGGGAAAGCCGGCGAACGTGGCGAGAAAGGAAGGGAAGAAAGCGTTTTCATTTTTTTTTTTCCACCTAGCGGTAAGCAAATTTTTTTTCTTAGCGATCCTAGGGCGATCA	NaN	0.07	0.65
482	GGGGACCAGGTGCCGTAAGGATCAATGTTTAGAGCTTGACGGGGAAAGCCGGCGAACGTGGCGAGAAAGGAAGGGAAGAAAGCGTTTTCATTTTTTTTTTTCCACCTAGCGGCATGCAAATTTTTTTTCTTAGCGATCCTAGGGCGATCA	0.14	0.11	0.83
483	GGGGACCAGGTGCCGTAAGAAGTAACGAATAGAGCTTGACGGGGAAAGCCGGCGAACGTGGCGAGAAAGGAAGGGAAGAAAGCGTTTTCATTTTTTTTTTTCCACCTAGCGGAACACAAATTTTTTTTCTTAGCGATCCTAGGGCGATCA	0.1	0.13	0.7
484	GGGGACCAGGTGCCGTAAGTGCCAACGCATAGAGCTTGACGGGGAAAGCCGGCGAACGTGGCGAGAAAGGAAGGGAAGAAAGCGTTTTCATTTTTTTTTTTCCACCTAGCGGCACTCAAATTTTTTTTCTTAGCGATCCTAGGGCGATCA	0.12	0.12	0.92
485	GGGGACCAGGTGCCGTAAGAGGTCTTCAGTAGAGCTTGACGGGGAAAGCCGGCGAACGTGGCGAGAAAGGAAGGGAAGAAAGCGTTTTCATTTTTTTTTTTCCACCTAGCGGCACGAAAATTTTTTTTCTTAGCGATCCTAGGGCGATCA	0.14	0.12	0.82
486	GGGGACCAGGTGCCGTAAGTGAAGTTAACTAGAGCTTGACGGGGAAAGCCGGCGAACGTGGCGAGAAAGGAAGGGAAGAAAGCGTTTTCATTTTTTTTTTTCCACCTAGCGGTACGGAAATTTTTTTTCTTAGCGATCCTAGGGCGATCA	0.19	0.1	0.93
487	GGGGACCAGGTGCCGTAAGACACTAGCTGTAGAGCTTGACGGGGAAAGCCGGCGAACGTGGCGAGAAAGGAAGGGAAGAAAGCGTTTTCATTTTTTTTTTTCCACCTAGCGGTACGCCAATTTTTTTTCTTAGCGATCCTAGGGCGATCA	0.09	0.1	0.99
488	GGGGACCAGGTGCCGTAAGGGCCGTTGACTAGAGCTTGACGGGGAAAGCCGGCGAACGTGGCGAGAAAGGAAGGGAAGAAAGCGTTTTCATTTTTTTTTTTCCACCTAGCGGTACGCTAATTTTTTTTCTTAGCGATCCTAGGGCGATCA	0.13	0.17	0.86
489	GGGGACCAGGTGCCGTAAGTAGGGCGGTCTAGAGCTTGACGGGGAAAGCCGGCGAACGTGGCGAGAAAGGAAGGGAAGAAAGCGTTTTCATTTTTTTTTTTCCACCTAGCGGTACGCAGATTTTTTTTCTTAGCGATCCTAGGGCGATCA	0.11	0.13	0.98
490	GGGGACCAGGTGCCGTAAGATAGAACCCGTAGAGCTTGACGGGGAAAGCCGGCGAACGTGGCGAGAAAGGAAGGGAAGAAAGCGTTTTCATTTTTTTTTTTCCACCTAGCGGAACGCAGATTTTTTTTCTTAGCGATCCTAGGGCGATCA	0.16	0.2	0.96
491	GGGGACCAGGTGCCGTAAGGGTTTCTGAGTAGAGCTTGACGGGGAAAGCCGGCGAACGTGGCGAGAAAGGAAGGGAAGAAAGCGTTTTCATTTTTTTTTTTCCACCTAGCGGAACGCAAGTTTTTTTTCTTAGCGATCCTAGGGCGATCA	0.09	0.14	1.17
492	GGGGACCAGGTGCCGTAAGCCTAATCTACTAGAGCTTGACGGGGAAAGCCGGCGAACGTGGCGAGAAAGGAAGGGAAGAAAGCGTTTTCATTTTTTTTTTTCCACCTAGCGGAACGCAATTTTTTTTTCTTAGCGATCCTAGGGCGATCA	0.13	0.14	0.69
493	GGGGACCAGGTGCCGTAAGCGATATGAGATAGAGCTTGACGGGGAAAGCCGGCGAACGTGGCGAGAAAGGAAGGGAAGAAAGCGTTTTCATTTTTTTTTTTCCACCTAGCGGGCAGCAAATTTTTTTTCTTAGCGATCCTAGGGCGATCA	0.08	0.1	0.94
494	GGGGACCAGGTGCCGTAAGTTCATTGATTTAGAGCTTGACGGGGAAAGCCGGCGAACGTGGCGAGAAAGGAAGGGAAGAAAGCGTTTTCATTTTTTTTTTTCCACCTAGCGGGGGGCAAATTTTTTTTCTTAGCGATCCTAGGGCGATCA	0.25	0.1	0.81
495	GGGGACCAGGTGCCGTAAGTACAGAGTAGTAGAGCTTGACGGGGAAAGCCGGCGAACGTGGCGAGAAAGGAAGGGAAGAAAGCGTTTTCATTTTTTTTTTTCCACCTAGCGGGCCTCAAATTTTTTTTCTTAGCGATCCTAGGGCGATCA	0.14	0.12	0.9
496	GGGGACCAGGTGCCGTAAGAGTGTCTTAATAGAGCTTGACGGGGAAAGCCGGCGAACGTGGCGAGAAAGGAAGGGAAGAAAGCGTTTTCATTTTTTTTTTTCCACCTAGCGGGGCACAAATTTTTTTTCTTAGCGATCCTAGGGCGATCA	0.14	0.1	0.94
497	GGGGACCAGGTGCCGTAAGCTGCGAGCTATAGAGCTTGACGGGGAAAGCCGGCGAACGTGGCGAGAAAGGAAGGGAAGAAAGCGTTTTCATTTTTTTTTTTCCACCTAGCGGGGCGAAAATTTTTTTTCTTAGCGATCCTAGGGCGATCA	0.08	0.12	0.8
498	GGGGACCAGGTGCCGTAAGACGAAGGATCTAGAGCTTGACGGGGAAAGCCGGCGAACGTGGCGAGAAAGGAAGGGAAGAAAGCGTTTTCATTTTTTTTTTTCCACCTAGCGGGTCGGAAATTTTTTTTCTTAGCGATCCTAGGGCGATCA	0.14	0.13	0.82
499	GGGGACCAGGTGCCGTAAGACGTTCAGACTAGAGCTTGACGGGGAAAGCCGGCGAACGTGGCGAGAAAGGAAGGGAAGAAAGCGTTTTCATTTTTTTTTTTCCACCTAGCGGGTCGCTAATTTTTTTTCTTAGCGATCCTAGGGCGATCA	0.09	0.1	0.89
500	GGGGACCAGGTGCCGTAAGCGTTAACTCGTAGAGCTTGACGGGGAAAGCCGGCGAACGTGGCGAGAAAGGAAGGGAAGAAAGCGTTTTCATTTTTTTTTTTCCACCTAGCGGGGCGCCAATTTTTTTTCTTAGCGATCCTAGGGCGATCA	0.1	0.1	1.02
501	GGGGACCAGGTGCCGTAAGACGTAGGGATTAGAGCTTGACGGGGAAAGCCGGCGAACGTGGCGAGAAAGGAAGGGAAGAAAGCGTTTTCATTTTTTTTTTTCCACCTAGCGGGTCGCATATTTTTTTTCTTAGCGATCCTAGGGCGATCA	0.19	0.32	0.89
502	GGGGACCAGGTGCCGTAAGCGTAGGACATTAGAGCTTGACGGGGAAAGCCGGCGAACGTGGCGAGAAAGGAAGGGAAGAAAGCGTTTTCATTTTTTTTTTTCCACCTAGCGGGGCGCATATTTTTTTTCTTAGCGATCCTAGGGCGATCA	0.18	0.06	1.01
503	GGGGACCAGGTGCCGTAAGGCTGTGACCATAGAGCTTGACGGGGAAAGCCGGCGAACGTGGCGAGAAAGGAAGGGAAGAAAGCGTTTTCATTTTTTTTTTTCCACCTAGCGGGTCGCAACTTTTTTTTCTTAGCGATCCTAGGGCGATCA	0.11	0.24	0.94
504	GGGGACCAGGTGCCGTAAGCCATGGGATTTAGAGCTTGACGGGGAAAGCCGGCGAACGTGGCGAGAAAGGAAGGGAAGAAAGCGTTTTCATTTTTTTTTTTCCACCTAGCGGGCCGCAAGTTTTTTTTCTTAGCGATCCTAGGGCGATCA	0.09	0.12	1.06
505	GGGGACCAGGTGCCGTAAGGTGTAAGCCGTAGAGCTTGACGGGGAAAGCCGGCGAACGTGGCGAGAAAGGAAGGGAAGAAAGCGTTTTCATTTTTTTTTTTCCACCTAGCGGGATACAAATTTTTTTTCTTAGCGATCCTAGGGCGATCA	NaN	0.14	0.92
506	GGGGACCAGGTGCCGTAAGATGACGTGTCTAGAGCTTGACGGGGAAAGCCGGCGAACGTGGCGAGAAAGGAAGGGAAGAAAGCGTTTTCATTTTTTTTTTTCCACCTAGCGGGAGACAAATTTTTTTTCTTAGCGATCCTAGGGCGATCA	NaN	NaN	1.04
507	GGGGACCAGGTGCCGTAAGGTGTATCTCGTAGAGCTTGACGGGGAAAGCCGGCGAACGTGGCGAGAAAGGAAGGGAAGAAAGCGTTTTCATTTTTTTTTTTCCACCTAGCGGGAAGGAAATTTTTTTTCTTAGCGATCCTAGGGCGATCA	0.13	0.23	1.22
508	GGGGACCAGGTGCCGTAAGGGCTACATGGTAGAGCTTGACGGGGAAAGCCGGCGAACGTGGCGAGAAAGGAAGGGAAGAAAGCGTTTTCATTTTTTTTTTTCCACCTAGCGGGAGGGAAATTTTTTTTCTTAGCGATCCTAGGGCGATCA	NaN	NaN	1.02
509	GGGGACCAGGTGCCGTAAGTGGACGTTCGTAGAGCTTGACGGGGAAAGCCGGCGAACGTGGCGAGAAAGGAAGGGAAGAAAGCGTTTTCATTTTTTTTTTTCCACCTAGCGGGAGGCTAATTTTTTTTCTTAGCGATCCTAGGGCGATCA	NaN	NaN	1.12
510	GGGGACCAGGTGCCGTAAGAAGATCAAGGTAGAGCTTGACGGGGAAAGCCGGCGAACGTGGCGAGAAAGGAAGGGAAGAAAGCGTTTTCATTTTTTTTTTTCCACCTAGCGGGAAGCGAATTTTTTTTCTTAGCGATCCTAGGGCGATCA	0.21	0.1	0.99
511	GGGGACCAGGTGCCGTAAGGTAGAAGTGCTAGAGCTTGACGGGGAAAGCCGGCGAACGTGGCGAGAAAGGAAGGGAAGAAAGCGTTTTCATTTTTTTTTTTCCACCTAGCGGGAAGCACATTTTTTTTCTTAGCGATCCTAGGGCGATCA	0.13	0.09	0.88
512	GGGGACCAGGTGCCGTAAGGCTAACCTCTTAGAGCTTGACGGGGAAAGCCGGCGAACGTGGCGAGAAAGGAAGGGAAGAAAGCGTTTTCATTTTTTTTTTTCCACCTAGCGGGAAGCATATTTTTTTTCTTAGCGATCCTAGGGCGATCA	NaN	NaN	1.03
513	GGGGACCAGGTGCCGTAAGTATGGGCGGGTAGAGCTTGACGGGGAAAGCCGGCGAACGTGGCGAGAAAGGAAGGGAAGAAAGCGTTTTCATTTTTTTTTTTCCACCTAGCGGGAGGCAAGTTTTTTTTCTTAGCGATCCTAGGGCGATCA	0.17	0.08	1.16
514	GGGGACCAGGTGCCGTAAGAATAGGACTATAGAGCTTGACGGGGAAAGCCGGCGAACGTGGCGAGAAAGGAAGGGAAGAAAGCGTTTTCATTTTTTTTTTTCCACCTAGCGGGAAGCAAGTTTTTTTTCTTAGCGATCCTAGGGCGATCA	0.15	0.13	0.86
515	GGGGACCAGGTGCCGTAAGGTTGCGGTCCTAGAGCTTGACGGGGAAAGCCGGCGAACGTGGCGAGAAAGGAAGGGAAGAAAGCGTTTTCATTTTTTTTTTTCCACCTAGCGGGACTAAAATTTTTTTTCTTAGCGATCCTAGGGCGATCA	NaN	0.02	0.8
516	GGGGACCAGGTGCCGTAAGGAGATTGTTCTAGAGCTTGACGGGGAAAGCCGGCGAACGTGGCGAGAAAGGAAGGGAAGAAAGCGTTTTCATTTTTTTTTTTCCACCTAGCGGGACATAAATTTTTTTTCTTAGCGATCCTAGGGCGATCA	0.14	0.16	0.99
517	GGGGACCAGGTGCCGTAAGCTACTACGAATAGAGCTTGACGGGGAAAGCCGGCGAACGTGGCGAGAAAGGAAGGGAAGAAAGCGTTTTCATTTTTTTTTTTCCACCTAGCGGGACCCGAATTTTTTTTCTTAGCGATCCTAGGGCGATCA	0.11	0.16	0.96
518	GGGGACCAGGTGCCGTAAGCCGAATAGTATAGAGCTTGACGGGGAAAGCCGGCGAACGTGGCGAGAAAGGAAGGGAAGAAAGCGTTTTCATTTTTTTTTTTCCACCTAGCGGGACTCCAATTTTTTTTCTTAGCGATCCTAGGGCGATCA	0.18	0.28	0.78
519	GGGGACCAGGTGCCGTAAGGGGCTACAAGTAGAGCTTGACGGGGAAAGCCGGCGAACGTGGCGAGAAAGGAAGGGAAGAAAGCGTTTTCATTTTTTTTTTTCCACCTAGCGGGACCCACATTTTTTTTCTTAGCGATCCTAGGGCGATCA	0.1	0.12	0.9
520	GGGGACCAGGTGCCGTAAGAACGTCTGGATAGAGCTTGACGGGGAAAGCCGGCGAACGTGGCGAGAAAGGAAGGGAAGAAAGCGTTTTCATTTTTTTTTTTCCACCTAGCGGGACACAGATTTTTTTTCTTAGCGATCCTAGGGCGATCA	0.19	0.09	1.14
521	GGGGACCAGGTGCCGTAAGGTCCCGATCTTAGAGCTTGACGGGGAAAGCCGGCGAACGTGGCGAGAAAGGAAGGGAAGAAAGCGTTTTCATTTTTTTTTTTCCACCTAGCGGGACTCAAGTTTTTTTTCTTAGCGATCCTAGGGCGATCA	0.14	0.13	0.93
522	GGGGACCAGGTGCCGTAAGGCACAGCTAATAGAGCTTGACGGGGAAAGCCGGCGAACGTGGCGAGAAAGGAAGGGAAGAAAGCGTTTTCATTTTTTTTTTTCCACCTAGCGGGACTCAACTTTTTTTTCTTAGCGATCCTAGGGCGATCA	NaN	NaN	1.4
523	GGGGACCAGGTGCCGTAAGAGCTTAATCGTAGAGCTTGACGGGGAAAGCCGGCGAACGTGGCGAGAAAGGAAGGGAAGAAAGCGTTTTCATTTTTTTTTTTCCACCTAGCGGGACGAGAATTTTTTTTCTTAGCGATCCTAGGGCGATCA	0.15	0.22	0.87
524	GGGGACCAGGTGCCGTAAGCAAAGGCAATTAGAGCTTGACGGGGAAAGCCGGCGAACGTGGCGAGAAAGGAAGGGAAGAAAGCGTTTTCATTTTTTTTTTTCCACCTAGCGGGACGGTAATTTTTTTTCTTAGCGATCCTAGGGCGATCA	0.12	0.08	0.85
525	GGGGACCAGGTGCCGTAAGCAGTAGCTGGTAGAGCTTGACGGGGAAAGCCGGCGAACGTGGCGAGAAAGGAAGGGAAGAAAGCGTTTTCATTTTTTTTTTTCCACCTAGCGGGACGAATATTTTTTTTCTTAGCGATCCTAGGGCGATCA	0.19	0.11	0.91
526	GGGGACCAGGTGCCGTAAGCGAAGCAGTTTAGAGCTTGACGGGGAAAGCCGGCGAACGTGGCGAGAAAGGAAGGGAAGAAAGCGTTTTCATTTTTTTTTTTCCACCTAGCGGGACGGAGATTTTTTTTCTTAGCGATCCTAGGGCGATCA	0.11	0.16	1.05
527	GGGGACCAGGTGCCGTAAGGAGAAACCCTTAGAGCTTGACGGGGAAAGCCGGCGAACGTGGCGAGAAAGGAAGGGAAGAAAGCGTTTTCATTTTTTTTTTTCCACCTAGCGGGACGTAATTTTTTTTTCTTAGCGATCCTAGGGCGATCA	NaN	0.06	0.71
528	GGGGACCAGGTGCCGTAAGATATCGTGCCTAGAGCTTGACGGGGAAAGCCGGCGAACGTGGCGAGAAAGGAAGGGAAGAAAGCGTTTTCATTTTTTTTTTTCCACCTAGCGGGACGGAATTTTTTTTTCTTAGCGATCCTAGGGCGATCA	0.19	0.07	0.88
529	GGGGACCAGGTGCCGTAAGACATGGTAGGTAGAGCTTGACGGGGAAAGCCGGCGAACGTGGCGAGAAAGGAAGGGAAGAAAGCGTTTTCATTTTTTTTTTTCCACCTAGCGGGACGCTCATTTTTTTTCTTAGCGATCCTAGGGCGATCA	0.12	0.09	0.82
530	GGGGACCAGGTGCCGTAAGTCTGTCGCTGTAGAGCTTGACGGGGAAAGCCGGCGAACGTGGCGAGAAAGGAAGGGAAGAAAGCGTTTTCATTTTTTTTTTTCCACCTAGCGGGACGCGGATTTTTTTTCTTAGCGATCCTAGGGCGATCA	0.16	0.08	0.95
531	GGGGACCAGGTGCCGTAAGGTACACACAGTAGAGCTTGACGGGGAAAGCCGGCGAACGTGGCGAGAAAGGAAGGGAAGAAAGCGTTTTCATTTTTTTTTTTCCACCTAGCGGGACGCCACTTTTTTTTCTTAGCGATCCTAGGGCGATCA	0.08	0.08	0.95
532	GGGGACCAGGTGCCGTAAGATTAGGCTGCTAGAGCTTGACGGGGAAAGCCGGCGAACGTGGCGAGAAAGGAAGGGAAGAAAGCGTTTTCATTTTTTTTTTTCCACCTAGCGGGACGCGAGTTTTTTTTCTTAGCGATCCTAGGGCGATCA	0.15	0.17	0.86
533	GGGGACCAGGTGCCGTAAGGACACGGTTTTAGAGCTTGACGGGGAAAGCCGGCGAACGTGGCGAGAAAGGAAGGGAAGAAAGCGTTTTCATTTTTTTTTTTCCACCTAGCGGGACGCATCTTTTTTTTCTTAGCGATCCTAGGGCGATCA	0.11	0.16	1.15
534	GGGGACCAGGTGCCGTAAGCCTAATTCTATAGAGCTTGACGGGGAAAGCCGGCGAACGTGGCGAGAAAGGAAGGGAAGAAAGCGTTTTCATTTTTTTTTTTCCACCTAGCGGGACGCAGCTTTTTTTTCTTAGCGATCCTAGGGCGATCA	0.17	0.19	0.88
535	GGGGACCAGGTGCCGTAAGGTCAGACTGATAGAGCTTGACGGGGAAAGCCGGCGAACGTGGCGAGAAAGGAAGGGAAGAAAGCGTTTTCATTTTTTTTTTTCCACCTAGCGGGAATCAACTTTTTTTTCTTAGCGATCCTAGGGCGATCA	0.12	0.07	1.06
536	GGGGACCAGGTGCCGTAAGCCTGCCCGGTTAGAGCTTGACGGGGAAAGCCGGCGAACGTGGCGAGAAAGGAAGGGAAGAAAGCGTTTTCATTTTTTTTTTTCCACCTAGCGGGGCGAAAGTTTTTTTTCTTAGCGATCCTAGGGCGATCA	0.12	0.16	1.03
537	GGGGACCAGGTGCCGTAAGTCCAGAAACGTAGAGCTTGACGGGGAAAGCCGGCGAACGTGGCGAGAAAGGAAGGGAAGAAAGCGTTTTCATTTTTTTTTTTCCACCTAGCGGGACGTTAGTTTTTTTTCTTAGCGATCCTAGGGCGATCA	0.11	0.13	0.92
538	GGGGACCAGGTGCCGTAAGCAAGTGTCTTTAGAGCTTGACGGGGAAAGCCGGCGAACGTGGCGAGAAAGGAAGGGAAGAAAGCGTTTTCATTTTTTTTTTTCCACCTAGCGGCACGCTTATTTTTTTTCTTAGCGATCCTAGGGCGATCA	0.13	0.11	0.97
539	GGGGACCAGGTGCCGTAAGCGGCAGTCCCTAGAGCTTGACGGGGAAAGCCGGCGAACGTGGCGAGAAAGGAAGGGAAGAAAGCGTTTTCATTTTTTTTTTTCCACCTAGCGGCACTCCAATTTTTTTTCTTAGCGATCCTAGGGCGATCA	0.12	0.06	0.79
540	GGGGACCAGGTGCCGTAAGTACACCTTTGTAGAGCTTGACGGGGAAAGCCGGCGAACGTGGCGAGAAAGGAAGGGAAGAAAGCGTTTTCATTTTTTTTTTTCCACCTAGCGGGCAGCTAATTTTTTTTCTTAGCGATCCTAGGGCGATCA	0.12	0.23	1.05
541	GGGGACCAGGTGCCGTAAGCTTGTTCAGATAGAGCTTGACGGGGAAAGCCGGCGAACGTGGCGAGAAAGGAAGGGAAGAAAGCGTTTTCATTTTTTTTTTTCCACCTAGCGGGAAGGTAATTTTTTTTCTTAGCGATCCTAGGGCGATCA	NaN	NaN	0.71
542	GGGGACCAGGTGCCGTAAGAAGCGAAAATTAGAGCTTGACGGGGAAAGCCGGCGAACGTGGCGAGAAAGGAAGGGAAGAAAGCGTTTTCATTTTTTTTTTTCCACCTAGCGGAACGAACATTTTTTTTCTTAGCGATCCTAGGGCGATCA	0.2	0.08	0.63
543	GGGGACCAGGTGCCGTAAGAGTCTGACTCTAGAGCTTGACGGGGAAAGCCGGCGAACGTGGCGAGAAAGGAAGGGAAGAAAGCGTTTTCATTTTTTTTTTTCCACCTAGCGGCCCGCCAATTTTTTTTCTTAGCGATCCTAGGGCGATCA	0.14	0.08	0.87
544	GGGGACCAGGTGCCGTAAGATACTTCTAATAGAGCTTGACGGGGAAAGCCGGCGAACGTGGCGAGAAAGGAAGGGAAGAAAGCGTTTTCATTTTTTTTTTTCCACCTAGCGGGCAGTAAATTTTTTTTCTTAGCGATCCTAGGGCGATCA	0.23	0.15	0.82
545	GGGGACCAGGTGCCGTAAGCTGATCTTAATAGAGCTTGACGGGGAAAGCCGGCGAACGTGGCGAGAAAGGAAGGGAAGAAAGCGTTTTCATTTTTTTTTTTCCACCTAGCCGGAACCGGCTTTTTTTTCTTAGCGATCCTAGGGCGATCA	0.17	0.15	0.87
546	GGGGACCAGGTGCCGTAAGTTCACACAGTTAGAGCTTGACGGGGAAAGCCGGCGAACGTGGCGAGAAAGGAAGGGAAGAAAGCGTTTTCATTTTTTTTTTTCCACCTATCCGGAACCGGCTTTTTTTTCTTAGCGATCCTAGGGCGATCA	0.18	0.13	0.98
547	GGGGACCAGGTGCCGTAAGCTCACACGGCTAGAGCTTGACGGGGAAAGCCGGCGAACGTGGCGAGAAAGGAAGGGAAGAAAGCGTTTTCATTTTTTTTTTTCCACCTAACCGGAACCGGCTTTTTTTTCTTAGCGATCCTAGGGCGATCA	0.08	0.08	0.94
548	GGGGACCAGGTGCCGTAAGCACTGTTGCATAGAGCTTGACGGGGAAAGCCGGCGAACGTGGCGAGAAAGGAAGGGAAGAAAGCGTTTTCATTTTTTTTTTTCCACCTACCCGGAACCGGCTTTTTTTTCTTAGCGATCCTAGGGCGATCA	0.19	0.11	1
549	GGGGACCAGGTGCCGTAAGGCCGTTTTAGTAGAGCTTGACGGGGAAAGCCGGCGAACGTGGCGAGAAAGGAAGGGAAGAAAGCGTTTTCATTTTTTTTTTTCCACCTAGTCGGAACCGGCTTTTTTTTCTTAGCGATCCTAGGGCGATCA	0.25	0.15	0.7
550	GGGGACCAGGTGCCGTAAGGGTTAACCAGTAGAGCTTGACGGGGAAAGCCGGCGAACGTGGCGAGAAAGGAAGGGAAGAAAGCGTTTTCATTTTTTTTTTTCCACCTAGACGGAACCGGCTTTTTTTTCTTAGCGATCCTAGGGCGATCA	0.11	0.1	0.95
551	GGGGACCAGGTGCCGTAAGTTTGGTCACGTAGAGCTTGACGGGGAAAGCCGGCGAACGTGGCGAGAAAGGAAGGGAAGAAAGCGTTTTCATTTTTTTTTTTCCACGTAGGCGGAACCGGCTTTTTTTTCTTAGCGATCCTAGGGCGATCA	0.11	0.1	0.91
552	GGGGACCAGGTGCCGTAAGAATAGAATCCTAGAGCTTGACGGGGAAAGCCGGCGAACGTGGCGAGAAAGGAAGGGAAGAAAGCGTTTTCATTTTTTTTTTTCCACCTAGCAGGAACCGGCTTTTTTTTCTTAGCGATCCTAGGGCGATCA	0.22	0.1	0.88
553	GGGGACCAGGTGCCGTAAGGTGTACACGGTAGAGCTTGACGGGGAAAGCCGGCGAACGTGGCGAGAAAGGAAGGGAAGAAAGCGTTTTCATTTTTTTTTTTCCACCTAGCTGGAACCGGCTTTTTTTTCTTAGCGATCCTAGGGCGATCA	0.11	0.08	0.8
554	GGGGACCAGGTGCCGTAAGGAATACAGCGTAGAGCTTGACGGGGAAAGCCGGCGAACGTGGCGAGAAAGGAAGGGAAGAAAGCGTTTTCATTTTTTTTTTTCCACCTAGCGGGAACCGGCTTTTTTTTCTTAGCGATCCTAGGGCGATCA	0.16	0.27	0.96
555	GGGGACCAGGTGCCGTAAGCGCTTACCACTAGAGCTTGACGGGGAAAGCCGGCGAACGTGGCGAGAAAGGAAGGGAAGAAAGCGTTTTCATTTTTTTTTTTCCACCTAGCCCGAACCGGCTTTTTTTTCTTAGCGATCCTAGGGCGATCA	0.06	0.12	1.01
556	GGGGACCAGGTGCCGTAAGCAGGAGGTGTTAGAGCTTGACGGGGAAAGCCGGCGAACGTGGCGAGAAAGGAAGGGAAGAAAGCGTTTTCATTTTTTTTTTTCCACCTAGCCAGAACCGGCTTTTTTTTCTTAGCGATCCTAGGGCGATCA	0.15	0.07	1.01
557	GGGGACCAGGTGCCGTAAGTTCACAATGCTAGAGCTTGACGGGGAAAGCCGGCGAACGTGGCGAGAAAGGAAGGGAAGAAAGCGTTTTCATTTTTTTTTTTCCACCTAGCCTGAACCGGCTTTTTTTTCTTAGCGATCCTAGGGCGATCA	0.19	0.12	1.01
558	GGGGACCAGGTGCCGTAAGATCGGCTCTGTAGAGCTTGACGGGGAAAGCCGGCGAACGTGGCGAGAAAGGAAGGGAAGAAAGCGTTTTCATTTTTTTTTTTCCACCTAGCCGCAACCGGCTTTTTTTTCTTAGCGATCCTAGGGCGATCA	0.11	0.17	1.05
559	GGGGACCAGGTGCCGTAAGCGTTGGCATTTAGAGCTTGACGGGGAAAGCCGGCGAACGTGGCGAGAAAGGAAGGGAAGAAAGCGTTTTCATTTTTTTTTTTCCACCTAGCCGTAACCGGCTTTTTTTTCTTAGCGATCCTAGGGCGATCA	0.12	0.1	1.1
560	GGGGACCAGGTGCCGTAAGACAGTTACTATAGAGCTTGACGGGGAAAGCCGGCGAACGTGGCGAGAAAGGAAGGGAAGAAAGCGTTTTCATTTTTTTTTTTCCACCTAGCCGAAACCGGCTTTTTTTTCTTAGCGATCCTAGGGCGATCA	0.22	0.13	0.79
561	GGGGACCAGGTGCCGTAAGACAAGTTAATTAGAGCTTGACGGGGAAAGCCGGCGAACGTGGCGAGAAAGGAAGGGAAGAAAGCGTTTTCATTTTTTTTTTTCCACCTAGCCGGTACCGGCTTTTTTTTCTTAGCGATCCTAGGGCGATCA	0.19	0.09	1.01
562	GGGGACCAGGTGCCGTAAGAGAGCGCGCCTAGAGCTTGACGGGGAAAGCCGGCGAACGTGGCGAGAAAGGAAGGGAAGAAAGCGTTTTCATTTTTTTTTTTCCACCTAGCCGGGACCGGCTTTTTTTTCTTAGCGATCCTAGGGCGATCA	0.08	0.14	0.97
563	GGGGACCAGGTGCCGTAAGTGTGGTAGAATAGAGCTTGACGGGGAAAGCCGGCGAACGTGGCGAGAAAGGAAGGGAAGAAAGCGTTTTCATTTTTTTTTTTCCACCTAGCCGGCACCGGCTTTTTTTTCTTAGCGATCCTAGGGCGATCA	0.27	0.08	0.94
564	GGGGACCAGGTGCCGTAAGCGTCTACAGCTAGAGCTTGACGGGGAAAGCCGGCGAACGTGGCGAGAAAGGAAGGGAAGAAAGCGTTTTCATTTTTTTTTTTCCACCTAGCCGGATCCGGCTTTTTTTTCTTAGCGATCCTAGGGCGATCA	0.15	0.09	0.92
565	GGGGACCAGGTGCCGTAAGTAAGAGTATTTAGAGCTTGACGGGGAAAGCCGGCGAACGTGGCGAGAAAGGAAGGGAAGAAAGCGTTTTCATTTTTTTTTTTCCACCTAGCCGGAGCCGGCTTTTTTTTCTTAGCGATCCTAGGGCGATCA	0.18	0.12	0.94
566	GGGGACCAGGTGCCGTAAGTGTTCGGACATAGAGCTTGACGGGGAAAGCCGGCGAACGTGGCGAGAAAGGAAGGGAAGAAAGCGTTTTCATTTTTTTTTTTCCACCTAGCCGGACCCGGCTTTTTTTTCTTAGCGATCCTAGGGCGATCA	0.22	0.09	0.89
567	GGGGACCAGGTGCCGTAAGAAAACGTTAGTAGAGCTTGACGGGGAAAGCCGGCGAACGTGGCGAGAAAGGAAGGGAAGAAAGCGTTTTCATTTTTTTTTTTCCACCTAGCCGGAAACGGCTTTTTTTTCTTAGCGATCCTAGGGCGATCA	0.1	0.09	0.87
568	GGGGACCAGGTGCCGTAAGCTCTGTCACGTAGAGCTTGACGGGGAAAGCCGGCGAACGTGGCGAGAAAGGAAGGGAAGAAAGCGTTTTCATTTTTTTTTTTCCACCTAGCCGGAAGCGGCTTTTTTTTCTTAGCGATCCTAGGGCGATCA	0.1	0.12	1.06
569	GGGGACCAGGTGCCGTAAGCGTACGAAGTTAGAGCTTGACGGGGAAAGCCGGCGAACGTGGCGAGAAAGGAAGGGAAGAAAGCGTTTTCATTTTTTTTTTTCCACCTAGCCGGAATCGGCTTTTTTTTCTTAGCGATCCTAGGGCGATCA	0.14	0.09	0.81
570	GGGGACCAGGTGCCGTAAGGTAGACCGACTAGAGCTTGACGGGGAAAGCCGGCGAACGTGGCGAGAAAGGAAGGGAAGAAAGCGTTTTCATTTTTTTTTTTCCACCTAGCCGGAACTGGCTTTTTTTTCTTAGCGATCCTAGGGCGATCA	0.13	0.08	1.01
571	GGGGACCAGGTGCCGTAAGCAGTTCTAAATAGAGCTTGACGGGGAAAGCCGGCGAACGTGGCGAGAAAGGAAGGGAAGAAAGCGTTTTCATTTTTTTTTTTCCACCTAGCCGGAACGGGCTTTTTTTTCTTAGCGATCCTAGGGCGATCA	0.15	0.14	0.93
572	GGGGACCAGGTGCCGTAAGCTCAAAACTATAGAGCTTGACGGGGAAAGCCGGCGAACGTGGCGAGAAAGGAAGGGAAGAAAGCGTTTTCATTTTTTTTTTTCCACCTAGCCGGAACAGGCTTTTTTTTCTTAGCGATCCTAGGGCGATCA	0.18	0.05	0.91
573	GGGGACCAGGTGCCGTAAGGTCTTTGGACTAGAGCTTGACGGGGAAAGCCGGCGAACGTGGCGAGAAAGGAAGGGAAGAAAGCGTTTTCATTTTTTTTTTTCCACCTAGCCGGAACCTGCTTTTTTTTCTTAGCGATCCTAGGGCGATCA	0.1	0.09	0.91
574	GGGGACCAGGTGCCGTAAGATGAGAGTAGTAGAGCTTGACGGGGAAAGCCGGCGAACGTGGCGAGAAAGGAAGGGAAGAAAGCGTTTTCATTTTTTTTTTTCCACCTAGCCGGAACCCGCTTTTTTTTCTTAGCGATCCTAGGGCGATCA	0.16	0.07	0.8
575	GGGGACCAGGTGCCGTAAGTGAGTGATCGTAGAGCTTGACGGGGAAAGCCGGCGAACGTGGCGAGAAAGGAAGGGAAGAAAGCGTTTTCATTTTTTTTTTTCCACCTAGCCGGAACCAGCTTTTTTTTCTTAGCGATCCTAGGGCGATCA	0.17	0.04	1.03
576	GGGGACCAGGTGCCGTAAGCGTGTGTGCTTAGAGCTTGACGGGGAAAGCCGGCGAACGTGGCGAGAAAGGAAGGGAAGAAAGCGTTTTCATTTTTTTTTTTCCACCTAGCCGGAACCGTCTTTTTTTTCTTAGCGATCCTAGGGCGATCA	0.13	0.07	1.07
577	GGGGACCAGGTGCCGTAAGAGACACTAATTAGAGCTTGACGGGGAAAGCCGGCGAACGTGGCGAGAAAGGAAGGGAAGAAAGCGTTTTCATTTTTTTTTTTCCACCTAGCCGGAACCGCCTTTTTTTTCTTAGCGATCCTAGGGCGATCA	0.2	0.09	0.91
578	GGGGACCAGGTGCCGTAAGTGCTTGGGTCTAGAGCTTGACGGGGAAAGCCGGCGAACGTGGCGAGAAAGGAAGGGAAGAAAGCGTTTTCATTTTTTTTTTTCCACCTAGCCGGAACCGACTTTTTTTTCTTAGCGATCCTAGGGCGATCA	0.12	0.85	0.99
579	GGGGACCAGGTGCCGTAAGCCATACCGAGTAGAGCTTGACGGGGAAAGCCGGCGAACGTGGCGAGAAAGGAAGGGAAGAAAGCGTTTTCATTTTTTTTTTTCCACCTAGCCGGAACCGGGTTTTTTTTCTTAGCGATCCTAGGGCGATCA	0.16	0.1	0.98
580	GGGGACCAGGTGCCGTAAGATAGCGTCTATAGAGCTTGACGGGGAAAGCCGGCGAACGTGGCGAGAAAGGAAGGGAAGAAAGCGTTTTCATTTTTTTTTTTCCACCTAGCCGGAACCGGATTTTTTTTCTTAGCGATCCTAGGGCGATCA	0.14	0.11	1.03
581	GGGGACCAGGTGCCGTAAGTCAAGAATACTAGAGCTTGACGGGGAAAGCCGGCGAACGTGGCGAGAAAGGAAGGGAAGAAAGCGTTTTCATTTTTTTTTTTCCACCTAGCCGGAACCGGTTTTTTTTTCTTAGCGATCCTAGGGCGATCA	0.14	0.12	0.9
582	GGGGACCAGGTGCCGTAAGGAGCGTCCTGTAGAGCTTGACGGGGAAAGCCGGCGAACGTGGCGAGAAAGGAAGGGAAGAAAGCGTTTTCATTTTTTTTTTTCCACCTACACGGAACCGGCTTTTTTTTCTTAGCGATCCTAGGGCGATCA	0.19	0.07	0.9
583	GGGGACCAGGTGCCGTAAGAACGAAAGAGTAGAGCTTGACGGGGAAAGCCGGCGAACGTGGCGAGAAAGGAAGGGAAGAAAGCGTTTTCATTTTTTTTTTTCCACCTATCTGGAACCGGCTTTTTTTTCTTAGCGATCCTAGGGCGATCA	0.14	0.27	0.85
584	GGGGACCAGGTGCCGTAAGGACTTGGTCATAGAGCTTGACGGGGAAAGCCGGCGAACGTGGCGAGAAAGGAAGGGAAGAAAGCGTTTTCATTTTTTTTTTTCCACCTATCCTGAACCGGCTTTTTTTTCTTAGCGATCCTAGGGCGATCA	0.23	0.73	1.02
585	GGGGACCAGGTGCCGTAAGTGTACACTGATAGAGCTTGACGGGGAAAGCCGGCGAACGTGGCGAGAAAGGAAGGGAAGAAAGCGTTTTCATTTTTTTTTTTCCACCTACCCGTAACCGGCTTTTTTTTCTTAGCGATCCTAGGGCGATCA	0.23	0.08	0.99
586	GGGGACCAGGTGCCGTAAGTACTCTAGGCTAGAGCTTGACGGGGAAAGCCGGCGAACGTGGCGAGAAAGGAAGGGAAGAAAGCGTTTTCATTTTTTTTTTTCCACCTATCCGGCACCGGCTTTTTTTTCTTAGCGATCCTAGGGCGATCA	0.21	0.12	0.95
587	GGGGACCAGGTGCCGTAAGACGCTTTCGCTAGAGCTTGACGGGGAAAGCCGGCGAACGTGGCGAGAAAGGAAGGGAAGAAAGCGTTTTCATTTTTTTTTTTCCACCTACCCGGACCCGGCTTTTTTTTCTTAGCGATCCTAGGGCGATCA	0.13	0.09	0.98
588	GGGGACCAGGTGCCGTAAGGACTGAGCTCTAGAGCTTGACGGGGAAAGCCGGCGAACGTGGCGAGAAAGGAAGGGAAGAAAGCGTTTTCATTTTTTTTTTTCCACCTACCCGGAAACGGCTTTTTTTTCTTAGCGATCCTAGGGCGATCA	0.16	0.13	0.83
589	GGGGACCAGGTGCCGTAAGGTCAGTAGATTAGAGCTTGACGGGGAAAGCCGGCGAACGTGGCGAGAAAGGAAGGGAAGAAAGCGTTTTCATTTTTTTTTTTCCACCTAACCGGAACGGGCTTTTTTTTCTTAGCGATCCTAGGGCGATCA	0.17	0.09	0.99
590	GGGGACCAGGTGCCGTAAGAGCTTTGACGTAGAGCTTGACGGGGAAAGCCGGCGAACGTGGCGAGAAAGGAAGGGAAGAAAGCGTTTTCATTTTTTTTTTTCCACCTACCCGGAACCAGCTTTTTTTTCTTAGCGATCCTAGGGCGATCA	0.31	0.17	0.72
591	GGGGACCAGGTGCCGTAAGAGGGACCCGCTAGAGCTTGACGGGGAAAGCCGGCGAACGTGGCGAGAAAGGAAGGGAAGAAAGCGTTTTCATTTTTTTTTTTCCACCTAACCGGAACCGCCTTTTTTTTCTTAGCGATCCTAGGGCGATCA	0.18	0.12	0.85
592	GGGGACCAGGTGCCGTAAGGTTGATCCTTTAGAGCTTGACGGGGAAAGCCGGCGAACGTGGCGAGAAAGGAAGGGAAGAAAGCGTTTTCATTTTTTTTTTTCCACCTATCCGGAACCGGTTTTTTTTTCTTAGCGATCCTAGGGCGATCA	0.18	0.21	0.91
593	GGGGACCAGGTGCCGTAAGTTAGCGCTAGTAGAGCTTGACGGGGAAAGCCGGCGAACGTGGCGAGAAAGGAAGGGAAGAAAGCGTTTTCATTTTTTTTTTTCCACCTAGTGGGAACCGGCTTTTTTTTCTTAGCGATCCTAGGGCGATCA	0.16	0.54	0.94
594	GGGGACCAGGTGCCGTAAGGGACACTATCTAGAGCTTGACGGGGAAAGCCGGCGAACGTGGCGAGAAAGGAAGGGAAGAAAGCGTTTTCATTTTTTTTTTTCCACCTAGACCGAACCGGCTTTTTTTTCTTAGCGATCCTAGGGCGATCA	0.15	0.1	0.84
595	GGGGACCAGGTGCCGTAAGATGTCTCGCTTAGAGCTTGACGGGGAAAGCCGGCGAACGTGGCGAGAAAGGAAGGGAAGAAAGCGTTTTCATTTTTTTTTTTCCACCTAGTCGCAACCGGCTTTTTTTTCTTAGCGATCCTAGGGCGATCA	0.14	0.09	1.03
596	GGGGACCAGGTGCCGTAAGCAAATACTAGTAGAGCTTGACGGGGAAAGCCGGCGAACGTGGCGAGAAAGGAAGGGAAGAAAGCGTTTTCATTTTTTTTTTTCCACCTAGTCGGTACCGGCTTTTTTTTCTTAGCGATCCTAGGGCGATCA	0.13	0.14	1.09
597	GGGGACCAGGTGCCGTAAGTGCCGCGGTCTAGAGCTTGACGGGGAAAGCCGGCGAACGTGGCGAGAAAGGAAGGGAAGAAAGCGTTTTCATTTTTTTTTTTCCACCTAGTCGGATCCGGCTTTTTTTTCTTAGCGATCCTAGGGCGATCA	0.13	0.06	0.96
598	GGGGACCAGGTGCCGTAAGTACTGAGCGATAGAGCTTGACGGGGAAAGCCGGCGAACGTGGCGAGAAAGGAAGGGAAGAAAGCGTTTTCATTTTTTTTTTTCCACGTAGGCGGAAGCGGCTTTTTTTTCTTAGCGATCCTAGGGCGATCA	0.17	0.09	1.02
599	GGGGACCAGGTGCCGTAAGCAGACATGCTTAGAGCTTGACGGGGAAAGCCGGCGAACGTGGCGAGAAAGGAAGGGAAGAAAGCGTTTTCATTTTTTTTTTTCCACCTAGTCGGAACGGGCTTTTTTTTCTTAGCGATCCTAGGGCGATCA	0.13	0.07	0.92
600	GGGGACCAGGTGCCGTAAGGGCGCGACATTAGAGCTTGACGGGGAAAGCCGGCGAACGTGGCGAGAAAGGAAGGGAAGAAAGCGTTTTCATTTTTTTTTTTCCACGTAGGCGGAACCCGCTTTTTTTTCTTAGCGATCCTAGGGCGATCA	0.1	0.07	0.94
601	GGGGACCAGGTGCCGTAAGACAGCTTCACTAGAGCTTGACGGGGAAAGCCGGCGAACGTGGCGAGAAAGGAAGGGAAGAAAGCGTTTTCATTTTTTTTTTTCCACCTAGACGGAACCGCCTTTTTTTTCTTAGCGATCCTAGGGCGATCA	0.18	0.19	0.88
602	GGGGACCAGGTGCCGTAAGTCGTTACAGATAGAGCTTGACGGGGAAAGCCGGCGAACGTGGCGAGAAAGGAAGGGAAGAAAGCGTTTTCATTTTTTTTTTTCCACCTAGTCGGAACCGGATTTTTTTTCTTAGCGATCCTAGGGCGATCA	0.23	0.31	1.05
603	GGGGACCAGGTGCCGTAAGTTAGGAGCGCTAGAGCTTGACGGGGAAAGCCGGCGAACGTGGCGAGAAAGGAAGGGAAGAAAGCGTTTTCATTTTTTTTTTTCCACCTAGCAAGAACCGGCTTTTTTTTCTTAGCGATCCTAGGGCGATCA	0.22	0.31	1.15
604	GGGGACCAGGTGCCGTAAGACGCCGTTGGTAGAGCTTGACGGGGAAAGCCGGCGAACGTGGCGAGAAAGGAAGGGAAGAAAGCGTTTTCATTTTTTTTTTTCCACCTAGCAGTAACCGGCTTTTTTTTCTTAGCGATCCTAGGGCGATCA	NaN	0.07	0.89
605	GGGGACCAGGTGCCGTAAGTCAGGTGAGTTAGAGCTTGACGGGGAAAGCCGGCGAACGTGGCGAGAAAGGAAGGGAAGAAAGCGTTTTCATTTTTTTTTTTCCACCTAGCAGGGACCGGCTTTTTTTTCTTAGCGATCCTAGGGCGATCA	0.13	0.09	0.86
606	GGGGACCAGGTGCCGTAAGACCGCCGGTCTAGAGCTTGACGGGGAAAGCCGGCGAACGTGGCGAGAAAGGAAGGGAAGAAAGCGTTTTCATTTTTTTTTTTCCACCTAGCAGGATCCGGCTTTTTTTTCTTAGCGATCCTAGGGCGATCA	0.13	0.08	1.01
607	GGGGACCAGGTGCCGTAAGAGATTTAGGATAGAGCTTGACGGGGAAAGCCGGCGAACGTGGCGAGAAAGGAAGGGAAGAAAGCGTTTTCATTTTTTTTTTTCCACCTAGCGGGAAACGGCTTTTTTTTCTTAGCGATCCTAGGGCGATCA	0.16	0.06	0.98
608	GGGGACCAGGTGCCGTAAGTATCGGGATTTAGAGCTTGACGGGGAAAGCCGGCGAACGTGGCGAGAAAGGAAGGGAAGAAAGCGTTTTCATTTTTTTTTTTCCACCTAGCGGGAACGGGCTTTTTTTTCTTAGCGATCCTAGGGCGATCA	0.19	0.12	0.93
609	GGGGACCAGGTGCCGTAAGTACGTCGACCTAGAGCTTGACGGGGAAAGCCGGCGAACGTGGCGAGAAAGGAAGGGAAGAAAGCGTTTTCATTTTTTTTTTTCCACCTAGCGGGAACCCGCTTTTTTTTCTTAGCGATCCTAGGGCGATCA	0.15	0.18	1.04
610	GGGGACCAGGTGCCGTAAGGCCGAAATTTTAGAGCTTGACGGGGAAAGCCGGCGAACGTGGCGAGAAAGGAAGGGAAGAAAGCGTTTTCATTTTTTTTTTTCCACCTAGCAGGAACCGTCTTTTTTTTCTTAGCGATCCTAGGGCGATCA	NaN	0.17	0.82
611	GGGGACCAGGTGCCGTAAGAGGTTACACATAGAGCTTGACGGGGAAAGCCGGCGAACGTGGCGAGAAAGGAAGGGAAGAAAGCGTTTTCATTTTTTTTTTTCCACCTAGCGGGAACCGGATTTTTTTTCTTAGCGATCCTAGGGCGATCA	0.19	0.14	0.95
612	GGGGACCAGGTGCCGTAAGCCCGAGGTGATAGAGCTTGACGGGGAAAGCCGGCGAACGTGGCGAGAAAGGAAGGGAAGAAAGCGTTTTCATTTTTTTTTTTCCACCTAGCCTCAACCGGCTTTTTTTTCTTAGCGATCCTAGGGCGATCA	0.2	0.08	1.13
613	GGGGACCAGGTGCCGTAAGCATATTCTTGTAGAGCTTGACGGGGAAAGCCGGCGAACGTGGCGAGAAAGGAAGGGAAGAAAGCGTTTTCATTTTTTTTTTTCCACCTAGCCCGTACCGGCTTTTTTTTCTTAGCGATCCTAGGGCGATCA	0.23	0.16	1.04
614	GGGGACCAGGTGCCGTAAGAGATTGCTATTAGAGCTTGACGGGGAAAGCCGGCGAACGTGGCGAGAAAGGAAGGGAAGAAAGCGTTTTCATTTTTTTTTTTCCACCTAGCCCGAGCCGGCTTTTTTTTCTTAGCGATCCTAGGGCGATCA	0.17	0.11	0.98
615	GGGGACCAGGTGCCGTAAGGCAAAGGCCTTAGAGCTTGACGGGGAAAGCCGGCGAACGTGGCGAGAAAGGAAGGGAAGAAAGCGTTTTCATTTTTTTTTTTCCACCTAGCCTGAAACGGCTTTTTTTTCTTAGCGATCCTAGGGCGATCA	NaN	NaN	0.83
616	GGGGACCAGGTGCCGTAAGCGCTTAGTTGTAGAGCTTGACGGGGAAAGCCGGCGAACGTGGCGAGAAAGGAAGGGAAGAAAGCGTTTTCATTTTTTTTTTTCCACCTAGCCAGAACGGGCTTTTTTTTCTTAGCGATCCTAGGGCGATCA	0.25	0.09	0.78
617	GGGGACCAGGTGCCGTAAGTTCGGGCCTTTAGAGCTTGACGGGGAAAGCCGGCGAACGTGGCGAGAAAGGAAGGGAAGAAAGCGTTTTCATTTTTTTTTTTCCACCTAGCCTGAACCAGCTTTTTTTTCTTAGCGATCCTAGGGCGATCA	0.17	0.15	0.84
618	GGGGACCAGGTGCCGTAAGCCTACTTAGGTAGAGCTTGACGGGGAAAGCCGGCGAACGTGGCGAGAAAGGAAGGGAAGAAAGCGTTTTCATTTTTTTTTTTCCACCTAGCCCGAACCGACTTTTTTTTCTTAGCGATCCTAGGGCGATCA	0.11	0.11	1.02
619	GGGGACCAGGTGCCGTAAGTTAGCAAGGGTAGAGCTTGACGGGGAAAGCCGGCGAACGTGGCGAGAAAGGAAGGGAAGAAAGCGTTTTCATTTTTTTTTTTCCACCTAGCCCGAACCGGGTTTTTTTTCTTAGCGATCCTAGGGCGATCA	0.13	0.13	0.99
620	GGGGACCAGGTGCCGTAAGAGCGACGTAATAGAGCTTGACGGGGAAAGCCGGCGAACGTGGCGAGAAAGGAAGGGAAGAAAGCGTTTTCATTTTTTTTTTTCCACCTAGCCGACACCGGCTTTTTTTTCTTAGCGATCCTAGGGCGATCA	0.08	0.09	0.9
621	GGGGACCAGGTGCCGTAAGTAGCCTTCGTTAGAGCTTGACGGGGAAAGCCGGCGAACGTGGCGAGAAAGGAAGGGAAGAAAGCGTTTTCATTTTTTTTTTTCCACCTAGCCGCAGCCGGCTTTTTTTTCTTAGCGATCCTAGGGCGATCA	0.19	0.11	1.16
622	GGGGACCAGGTGCCGTAAGGTCACAGTTGTAGAGCTTGACGGGGAAAGCCGGCGAACGTGGCGAGAAAGGAAGGGAAGAAAGCGTTTTCATTTTTTTTTTTCCACCTAGCCGTAAGCGGCTTTTTTTTCTTAGCGATCCTAGGGCGATCA	0.12	0.06	0.96
623	GGGGACCAGGTGCCGTAAGCATTCAATAGTAGAGCTTGACGGGGAAAGCCGGCGAACGTGGCGAGAAAGGAAGGGAAGAAAGCGTTTTCATTTTTTTTTTTCCACCTAGCCGTAACTGGCTTTTTTTTCTTAGCGATCCTAGGGCGATCA	0.12	0.16	0.89
624	GGGGACCAGGTGCCGTAAGGGACCGCGGTTAGAGCTTGACGGGGAAAGCCGGCGAACGTGGCGAGAAAGGAAGGGAAGAAAGCGTTTTCATTTTTTTTTTTCCACCTAGCCGCAACCCGCTTTTTTTTCTTAGCGATCCTAGGGCGATCA	0.14	0.13	1.12
625	GGGGACCAGGTGCCGTAAGGCTTTACGCCTAGAGCTTGACGGGGAAAGCCGGCGAACGTGGCGAGAAAGGAAGGGAAGAAAGCGTTTTCATTTTTTTTTTTCCACCTAGCCGTAACCGTCTTTTTTTTCTTAGCGATCCTAGGGCGATCA	0.13	0.18	0.93
626	GGGGACCAGGTGCCGTAAGCTTGTCAATTTAGAGCTTGACGGGGAAAGCCGGCGAACGTGGCGAGAAAGGAAGGGAAGAAAGCGTTTTCATTTTTTTTTTTCCACCTAGCCGAAACCGGATTTTTTTTCTTAGCGATCCTAGGGCGATCA	0.26	0.14	0.82
627	GGGGACCAGGTGCCGTAAGACCATGTTACTAGAGCTTGACGGGGAAAGCCGGCGAACGTGGCGAGAAAGGAAGGGAAGAAAGCGTTTTCATTTTTTTTTTTCCACCTAGCCGGGTCCGGCTTTTTTTTCTTAGCGATCCTAGGGCGATCA	0.27	0.22	0.93
628	GGGGACCAGGTGCCGTAAGATATTTTACGTAGAGCTTGACGGGGAAAGCCGGCGAACGTGGCGAGAAAGGAAGGGAAGAAAGCGTTTTCATTTTTTTTTTTCCACCTAGCCGGTAGCGGCTTTTTTTTCTTAGCGATCCTAGGGCGATCA	0.23	0.18	0.94
629	GGGGACCAGGTGCCGTAAGTGAGACAATATAGAGCTTGACGGGGAAAGCCGGCGAACGTGGCGAGAAAGGAAGGGAAGAAAGCGTTTTCATTTTTTTTTTTCCACCTAGCCGGTACGGGCTTTTTTTTCTTAGCGATCCTAGGGCGATCA	0.12	0.27	0.87
630	GGGGACCAGGTGCCGTAAGATCAGACGAATAGAGCTTGACGGGGAAAGCCGGCGAACGTGGCGAGAAAGGAAGGGAAGAAAGCGTTTTCATTTTTTTTTTTCCACCTAGCCGGCACCAGCTTTTTTTTCTTAGCGATCCTAGGGCGATCA	0.16	0.1	1.02
631	GGGGACCAGGTGCCGTAAGGATAGGTTGATAGAGCTTGACGGGGAAAGCCGGCGAACGTGGCGAGAAAGGAAGGGAAGAAAGCGTTTTCATTTTTTTTTTTCCACCTAGCCGGGACCGTCTTTTTTTTCTTAGCGATCCTAGGGCGATCA	0.19	0.19	1
632	GGGGACCAGGTGCCGTAAGCGCATGTGGTTAGAGCTTGACGGGGAAAGCCGGCGAACGTGGCGAGAAAGGAAGGGAAGAAAGCGTTTTCATTTTTTTTTTTCCACCTAGCCGGGACCGGGTTTTTTTTCTTAGCGATCCTAGGGCGATCA	0.1	0.09	1
633	GGGGACCAGGTGCCGTAAGTACGTTCTTATAGAGCTTGACGGGGAAAGCCGGCGAACGTGGCGAGAAAGGAAGGGAAGAAAGCGTTTTCATTTTTTTTTTTCCACCTAGCCGGAGACGGCTTTTTTTTCTTAGCGATCCTAGGGCGATCA	0.27	0.17	1.02
634	GGGGACCAGGTGCCGTAAGCGGTCAATCTTAGAGCTTGACGGGGAAAGCCGGCGAACGTGGCGAGAAAGGAAGGGAAGAAAGCGTTTTCATTTTTTTTTTTCCACCTAGCCGGATCTGGCTTTTTTTTCTTAGCGATCCTAGGGCGATCA	0.11	0.12	1.01
635	GGGGACCAGGTGCCGTAAGCGATCAGAAATAGAGCTTGACGGGGAAAGCCGGCGAACGTGGCGAGAAAGGAAGGGAAGAAAGCGTTTTCATTTTTTTTTTTCCACCTAGCCGGACCCTGCTTTTTTTTCTTAGCGATCCTAGGGCGATCA	0.08	0.12	0.87
636	GGGGACCAGGTGCCGTAAGTACATACGGGTAGAGCTTGACGGGGAAAGCCGGCGAACGTGGCGAGAAAGGAAGGGAAGAAAGCGTTTTCATTTTTTTTTTTCCACCTAGCCGGAGCCGCCTTTTTTTTCTTAGCGATCCTAGGGCGATCA	0.12	0.13	0.93
637	GGGGACCAGGTGCCGTAAGGAGAATAGCCTAGAGCTTGACGGGGAAAGCCGGCGAACGTGGCGAGAAAGGAAGGGAAGAAAGCGTTTTCATTTTTTTTTTTCCACCTAGCCGGAGCCGGTTTTTTTTTCTTAGCGATCCTAGGGCGATCA	0.15	0.09	1
638	GGGGACCAGGTGCCGTAAGGTCGTCGTAGTAGAGCTTGACGGGGAAAGCCGGCGAACGTGGCGAGAAAGGAAGGGAAGAAAGCGTTTTCATTTTTTTTTTTCCACCTAGCCGGAATAGGCTTTTTTTTCTTAGCGATCCTAGGGCGATCA	NaN	0.12	0.87
639	GGGGACCAGGTGCCGTAAGGTCGCTGGAGTAGAGCTTGACGGGGAAAGCCGGCGAACGTGGCGAGAAAGGAAGGGAAGAAAGCGTTTTCATTTTTTTTTTTCCACCTAGCCGGAAACAGCTTTTTTTTCTTAGCGATCCTAGGGCGATCA	NaN	NaN	0.79
640	GGGGACCAGGTGCCGTAAGTCGGCTCAATTAGAGCTTGACGGGGAAAGCCGGCGAACGTGGCGAGAAAGGAAGGGAAGAAAGCGTTTTCATTTTTTTTTTTCCACCTAGCCGGAAGCGCCTTTTTTTTCTTAGCGATCCTAGGGCGATCA	0.1	0.11	0.9
641	GGGGACCAGGTGCCGTAAGACCGCGACCATAGAGCTTGACGGGGAAAGCCGGCGAACGTGGCGAGAAAGGAAGGGAAGAAAGCGTTTTCATTTTTTTTTTTCCACCTAGCCGGAAGCGGATTTTTTTTCTTAGCGATCCTAGGGCGATCA	0.1	0.06	1.02
642	GGGGACCAGGTGCCGTAAGGTGGGTGCCCTAGAGCTTGACGGGGAAAGCCGGCGAACGTGGCGAGAAAGGAAGGGAAGAAAGCGTTTTCATTTTTTTTTTTCCACCTAGCCGGAACTAGCTTTTTTTTCTTAGCGATCCTAGGGCGATCA	NaN	0.34	1.03
643	GGGGACCAGGTGCCGTAAGGCCGACTAACTAGAGCTTGACGGGGAAAGCCGGCGAACGTGGCGAGAAAGGAAGGGAAGAAAGCGTTTTCATTTTTTTTTTTCCACCTAGCCGGAACGGCCTTTTTTTTCTTAGCGATCCTAGGGCGATCA	0.16	0.11	0.92
644	GGGGACCAGGTGCCGTAAGTTCGTACCAGTAGAGCTTGACGGGGAAAGCCGGCGAACGTGGCGAGAAAGGAAGGGAAGAAAGCGTTTTCATTTTTTTTTTTCCACCTAGCCGGAACTGGTTTTTTTTTCTTAGCGATCCTAGGGCGATCA	0.2	0.28	0.97
645	GGGGACCAGGTGCCGTAAGCTTGTTAGCGTAGAGCTTGACGGGGAAAGCCGGCGAACGTGGCGAGAAAGGAAGGGAAGAAAGCGTTTTCATTTTTTTTTTTCCACCTAGCCGGAACCACCTTTTTTTTCTTAGCGATCCTAGGGCGATCA	0.15	0.43	1.07
646	GGGGACCAGGTGCCGTAAGCCAAACGTTGTAGAGCTTGACGGGGAAAGCCGGCGAACGTGGCGAGAAAGGAAGGGAAGAAAGCGTTTTCATTTTTTTTTTTCCACCTAGCCGGAACCCGTTTTTTTTTCTTAGCGATCCTAGGGCGATCA	0.11	0.09	0.84
647	GGGGACCAGGTGCCGTAAGTCCCTAAAACTAGAGCTTGACGGGGAAAGCCGGCGAACGTGGCGAGAAAGGAAGGGAAGAAAGCGTTTTCATTTTTTTTTTTCCACCTAGCCGGAACCGTGTTTTTTTTCTTAGCGATCCTAGGGCGATCA	0.12	0.1	0.84
648	GGGGACCAGGTGCCGTAAGTATGCACGGTTAGAGCTTGACGGGGAAAGCCGGCGAACGTGGCGAGAAAGGAAGGGAAGAAAGCGTTTTCATTTTTTTTTTTCCACCTAGCTCGCACCGGCTTTTTTTTCTTAGCGATCCTAGGGCGATCA	0.11	0.1	1.07
649	GGGGACCAGGTGCCGTAAGAAGGTGAGTGTAGAGCTTGACGGGGAAAGCCGGCGAACGTGGCGAGAAAGGAAGGGAAGAAAGCGTTTTCATTTTTTTTTTTCCACCTAATCGGAAACGGCTTTTTTTTCTTAGCGATCCTAGGGCGATCA	NaN	NaN	0.74
650	GGGGACCAGGTGCCGTAAGGATTCACTGCTAGAGCTTGACGGGGAAAGCCGGCGAACGTGGCGAGAAAGGAAGGGAAGAAAGCGTTTTCATTTTTTTTTTTCCACGTAGGCTGAACCGGTTTTTTTTTCTTAGCGATCCTAGGGCGATCA	0.16	0.08	1.07
651	GGGGACCAGGTGCCGTAAGCTAAAGCTCCTAGAGCTTGACGGGGAAAGCCGGCGAACGTGGCGAGAAAGGAAGGGAAGAAAGCGTTTTCATTTTTTTTTTTCCACCTAGCGGGATCCGGTTTTTTTTTCTTAGCGATCCTAGGGCGATCA	0.13	0.04	0.96
652	GGGGACCAGGTGCCGTAAGGCGAGATACGTAGAGCTTGACGGGGAAAGCCGGCGAACGTGGCGAGAAAGGAAGGGAAGAAAGCGTTTTCATTTTTTTTTTTCCACCTAGCTGGGACCGTCTTTTTTTTCTTAGCGATCCTAGGGCGATCA	0.1	0.07	0.85
653	GGGGACCAGGTGCCGTAAGCCTTGTTACTTAGAGCTTGACGGGGAAAGCCGGCGAACGTGGCGAGAAAGGAAGGGAAGAAAGCGTTTTCATTTTTTTTTTTCCACCTAGACCCAACCGGCTTTTTTTTCTTAGCGATCCTAGGGCGATCA	0.38	0.1	0.98
654	GGGGACCAGGTGCCGTAAGAAACGTCGTATAGAGCTTGACGGGGAAAGCCGGCGAACGTGGCGAGAAAGGAAGGGAAGAAAGCGTTTTCATTTTTTTTTTTCCACCTAGAAAGAACCGGCTTTTTTTTCTTAGCGATCCTAGGGCGATCA	NaN	0.43	0.76
655	GGGGACCAGGTGCCGTAAGGTTAATGTGATAGAGCTTGACGGGGAAAGCCGGCGAACGTGGCGAGAAAGGAAGGGAAGAAAGCGTTTTCATTTTTTTTTTTCCACCTAGCTAGAACCGTCTTTTTTTTCTTAGCGATCCTAGGGCGATCA	NaN	NaN	1.03
656	GGGGACCAGGTGCCGTAAGGGTCGGATCATAGAGCTTGACGGGGAAAGCCGGCGAACGTGGCGAGAAAGGAAGGGAAGAAAGCGTTTTCATTTTTTTTTTTCCACCTAACCGGCATCGGCTTTTTTTTCTTAGCGATCCTAGGGCGATCA	0.11	0.08	0.96
657	GGGGACCAGGTGCCGTAAGACAGTACGGGTAGAGCTTGACGGGGAAAGCCGGCGAACGTGGCGAGAAAGGAAGGGAAGAAAGCGTTTTCATTTTTTTTTTTCCACCTAGCCGGAATCAACTTTTTTTTCTTAGCGATCCTAGGGCGATCA	0.25	0.16	0.99
658	GGGGACCAGGTGCCGTAAGAATGGTAGTTTAGAGCTTGACGGGGAAAGCCGGCGAACGTGGCGAGAAAGGAAGGGAAGAAAGCGTTTTCATTTTTTTTTTTCCACGTAGGCGGAACCGCCTTTTTTTTCTTAGCGATCCTAGGGCGATCA	0.16	0.15	1
659	GGGGACCAGGTGCCGTAAGAGCACGTCATTAGAGCTTGACGGGGAAAGCCGGCGAACGTGGCGAGAAAGGAAGGGAAGAAAGCGTTTTCATTTTTTTTTTTCCACCTAGCAGGAACCTGCTTTTTTTTCTTAGCGATCCTAGGGCGATCA	0.14	0.08	0.97
660	GGGGACCAGGTGCCGTAAGGTCGGACGTTTAGAGCTTGACGGGGAAAGCCGGCGAACGTGGCGAGAAAGGAAGGGAAGAAAGCGTTTTCATTTTTTTTTTTCCACCTAGCCCGAACGGGCTTTTTTTTCTTAGCGATCCTAGGGCGATCA	0.13	0.08	1.06
661	GGGGACCAGGTGCCGTAAGTGCAGCTCTGTAGAGCTTGACGGGGAAAGCCGGCGAACGTGGCGAGAAAGGAAGGGAAGAAAGCGTTTTCATTTTTTTTTTTCCACCTAGCCGTAAACGGCTTTTTTTTCTTAGCGATCCTAGGGCGATCA	0.1	0.09	1.02
662	GGGGACCAGGTGCCGTAAGTACGCTATTTGCACTAAATCGGAACCCTAAAGGGAGCCCCCGATTTAGAGCTTGACGGGGAAAGCCGGCGAACGTGGCGAGAAAGGAAGGGAAGAAAGCGCCACCTAGCGGAAGCGATCCTAGGGCGATCA	NaN	0.11	1.08
663	GGGGACCAGGTGCCGTAAGTAGCTAAGTGGCACTAAATCGGAACCCTAAAGGGAGCCCCCGATTTAGAGCTTGACGGGGAAAGCCGGCGAACGTGGCGAGAAAGGAAGGGAAGAAATTTTTTTTTTTTTTTAGCGATCCTAGGGCGATCA	0.14	0.11	0.82
664	GGGGACCAGGTGCCGTAAGCGTGGCTTTAGCACTAAATCGGAACCCTAAAGGGAGCCCCCGATTTAGAGCTTGACGGGGTTTTTTTTTTTTTTTGGCGAGAAAGGAAGGGAAGAAAGCGCCACCTAGCGGAAGCGATCCTAGGGCGATCA	0.14	0.13	0.49
665	GGGGACCAGGTGCCGTAAGTGATTTACCTGCACTAAATCGGAACCCTAAAGGGTTTTTTTTTTTTTTTGCTTGACGGGGAAAGCCGGCGAACGTGGCGAGAAAGGAAGGGAAGAAAGCGCCACCTAGCGGAAGCGATCCTAGGGCGATCA	NaN	0.13	1.25
666	GGGGACCAGGTGCCGTAAGACCCTGTAGCGTTTTTTTTTTTTTTTCTAAAGGGAGCCCCCGATTTAGAGCTTGACGGGGAAAGCCGGCGAACGTGGCGAGAAAGGAAGGGAAGAAAGCGCCACCTAGCGGAAGCGATCCTAGGGCGATCA	0.13	0.06	1.13
667	GGGGACCAGGTGCCGTAAGGAGTGCGACAAAGCCGGACAGGCAGCGACAGCCCTGACAGACAAGACTCTCCTAGCTGCGTCCTCGTCTTCACCGGTCGCGTTCCTGAAACGCAGATGTGCCTACAGCCGCACGCGATCCTAGGGCGATCA	0.23	0.05	1.27
668	GGGGACCAGGTGCCGTAAGCGTGAATGAAAAGCCGGACAGGCAGCGACAGCCCTGACAGACAAGACTCTCCTAGCTGCGTCCTCGTCTTCACCGGTCGCGTTCCTGAAACGCAGATTTTTTTTTTTTTTTTCGCGATCCTAGGGCGATCA	0.2	0.09	1.03
669	GGGGACCAGGTGCCGTAAGAAGTTCGCAGAAGCCGGACAGGCAGCGACAGCCCTGACAGACAAGACTCTCCTAGCTGCGTTTTTTTTTTTTTTTGTCGCGTTCCTGAAACGCAGATGTGCCTACAGCCGCACGCGATCCTAGGGCGATCA	0.15	0.07	0.84
670	GGGGACCAGGTGCCGTAAGAATATTGCGCAAGCCGGACAGGCAGCGACAGCCCTTTTTTTTTTTTTTTTCCTAGCTGCGTCCTCGTCTTCACCGGTCGCGTTCCTGAAACGCAGATGTGCCTACAGCCGCACGCGATCCTAGGGCGATCA	0.19	0.06	0.98
671	GGGGACCAGGTGCCGTAAGCATTGCGCACATTTTTTTTTTTTTTTGACAGCCCTGACAGACAAGACTCTCCTAGCTGCGTCCTCGTCTTCACCGGTCGCGTTCCTGAAACGCAGATGTGCCTACAGCCGCACGCGATCCTAGGGCGATCA	0.13	0.07	1.11
672	GGGGACCAGGTGCCGTAAGAACTATGGATGCACTAAATCGGAACCCTAAAGGGAGCCCCCGATTTAGAGCTTGACGGGGTTTTTTTTTTTTTTTGGCGAGAAAGGAAGGGAAGAAATTTTTTTTTTTTTTTAGCGATCCTAGGGCGATCA	0.21	0.22	0.5
673	GGGGACCAGGTGCCGTAAGCGGCTAACCAGCACTAAATCGGAACCCTAAAGGGTTTTTTTTTTTTTTTGCTTGACGGGGAAAGCCGGCGAACGTGGCGAGAAAGGAAGGGAAGAAATTTTTTTTTTTTTTTAGCGATCCTAGGGCGATCA	0.19	0.21	0.88
674	GGGGACCAGGTGCCGTAAGGCCGCGATTGGTTTTTTTTTTTTTTTCTAAAGGGAGCCCCCGATTTAGAGCTTGACGGGGAAAGCCGGCGAACGTGGCGAGAAAGGAAGGGAAGAAATTTTTTTTTTTTTTTAGCGATCCTAGGGCGATCA	0.17	0.21	0.68
675	GGGGACCAGGTGCCGTAAGCCTCAGTAATAAGCCGGACAGGCAGCGACAGCCCTGACAGACAAGACTCTCCTAGCTGCGTTTTTTTTTTTTTTTGTCGCGTTCCTGAAACGCAGATTTTTTTTTTTTTTTTCGCGATCCTAGGGCGATCA	0.2	0.1	0.72
676	GGGGACCAGGTGCCGTAAGTCTTGACGATAAGCCGGACAGGCAGCGACAGCCCTTTTTTTTTTTTTTTTCCTAGCTGCGTCCTCGTCTTCACCGGTCGCGTTCCTGAAACGCAGATTTTTTTTTTTTTTTTCGCGATCCTAGGGCGATCA	0.23	0.12	0.74
677	GGGGACCAGGTGCCGTAAGGCTGAGAGTAATTTTTTTTTTTTTTTGACAGCCCTGACAGACAAGACTCTCCTAGCTGCGTCCTCGTCTTCACCGGTCGCGTTCCTGAAACGCAGATTTTTTTTTTTTTTTTCGCGATCCTAGGGCGATCA	0.23	0.08	0.72
678	GGGGACCAGGTGCCGTAAGCTAAACCTGAGTTTTTTTTTTTTTTTCTAAAGGGAGCCCCCGATTTAGAGCTTGACGGGGTTTTTTTTTTTTTTTGGCGAGAAAGGAAGGGAAGAAAGCGCCACCTAGCGGAAGCGATCCTAGGGCGATCA	NaN	0.07	0.51
679	GGGGACCAGGTGCCGTAAGCGCTGACGGCATTTTTTTTTTTTTTTGACAGCCCTGACAGACAAGACTCTCCTAGCTGCGTTTTTTTTTTTTTTTGTCGCGTTCCTGAAACGCAGATGTGCCTACAGCCGCACGCGATCCTAGGGCGATCA	0.14	0.07	0.72
680	GGGGACCAGGTGCCGTAAGATTAGTGCAGGCACTAAATCGGAACCCTAAAGGGAGCCCCCGATTTAGAGCTTGACGGGGAAAGCCGGCGAACGTGGCGAGAAAGGAAGGGAAGAAAGCGCCACCTAGCGGAAGCGATCCTAGGGCGATCA	NaN	0.09	1.03
681	GGGGACCAGGTGCCGTAAGGCTTGAGCTTGCACTAAATCGGAACCCTAAAGGGAGCCCCCGATTTAGAGCTTGACGGGGAAAGCCGGCGAACGTGGCGAGAAAGGAAGGGAAGAAATTTTTTTTTTTTTTTAGCGATCCTAGGGCGATCA	0.18	0.15	0.96
682	GGGGACCAGGTGCCGTAAGTGCCAAATTAGCACTAAATCGGAACCCTAAAGGGAGCCCCCGATTTAGAGCTTGACGGGGTTTTTTTTTTTTTTTGGCGAGAAAGGAAGGGAAGAAAGCGCCACCTAGCGGAAGCGATCCTAGGGCGATCA	0.34	0.15	0.43
683	GGGGACCAGGTGCCGTAAGGGTAAGCTTGGCACTAAATCGGAACCCTAAAGGGTTTTTTTTTTTTTTTGCTTGACGGGGAAAGCCGGCGAACGTGGCGAGAAAGGAAGGGAAGAAAGCGCCACCTAGCGGAAGCGATCCTAGGGCGATCA	0.36	0.49	0.89
684	GGGGACCAGGTGCCGTAAGCGCTCCACTCGTTTTTTTTTTTTTTTCTAAAGGGAGCCCCCGATTTAGAGCTTGACGGGGAAAGCCGGCGAACGTGGCGAGAAAGGAAGGGAAGAAAGCGCCACCTAGCGGAAGCGATCCTAGGGCGATCA	0.11	0.05	1.02
685	GGGGACCAGGTGCCGTAAGCGCCTAGTCCAAGCCGGACAGGCAGCGACAGCCCTGACAGACAAGACTCTCCTAGCTGCGTCCTCGTCTTCACCGGTCGCGTTCCTGAAACGCAGATGTGCCTACAGCCGCACGCGATCCTAGGGCGATCA	0.17	0.03	1.25
686	GGGGACCAGGTGCCGTAAGGGCCCTGGGAAAGCCGGACAGGCAGCGACAGCCCTGACAGACAAGACTCTCCTAGCTGCGTCCTCGTCTTCACCGGTCGCGTTCCTGAAACGCAGATTTTTTTTTTTTTTTTCGCGATCCTAGGGCGATCA	0.24	0.1	1.12
687	GGGGACCAGGTGCCGTAAGCTAGCTGGTAAAGCCGGACAGGCAGCGACAGCCCTGACAGACAAGACTCTCCTAGCTGCGTTTTTTTTTTTTTTTGTCGCGTTCCTGAAACGCAGATGTGCCTACAGCCGCACGCGATCCTAGGGCGATCA	0.14	0.06	0.84
688	GGGGACCAGGTGCCGTAAGGTCATAGAGAAAGCCGGACAGGCAGCGACAGCCCTTTTTTTTTTTTTTTTCCTAGCTGCGTCCTCGTCTTCACCGGTCGCGTTCCTGAAACGCAGATGTGCCTACAGCCGCACGCGATCCTAGGGCGATCA	0.2	0.07	0.9
689	GGGGACCAGGTGCCGTAAGCAAACGCATAATTTTTTTTTTTTTTTGACAGCCCTGACAGACAAGACTCTCCTAGCTGCGTCCTCGTCTTCACCGGTCGCGTTCCTGAAACGCAGATGTGCCTACAGCCGCACGCGATCCTAGGGCGATCA	0.18	0.08	1.08
690	GGGGACCAGGTGCCGTAAGCTGCCCGCGTGCACTAAATCGGAACCCTAAAGGGAGCCCCCGATTTAGAGCTTGACGGGGTTTTTTTTTTTTTTTGGCGAGAAAGGAAGGGAAGAAATTTTTTTTTTTTTTTAGCGATCCTAGGGCGATCA	0.08	0.08	0.51
691	GGGGACCAGGTGCCGTAAGGCATGAGTAGGCACTAAATCGGAACCCTAAAGGGTTTTTTTTTTTTTTTGCTTGACGGGGAAAGCCGGCGAACGTGGCGAGAAAGGAAGGGAAGAAATTTTTTTTTTTTTTTAGCGATCCTAGGGCGATCA	0.12	0.23	0.9
692	GGGGACCAGGTGCCGTAAGGCGTTTGAACGTTTTTTTTTTTTTTTCTAAAGGGAGCCCCCGATTTAGAGCTTGACGGGGAAAGCCGGCGAACGTGGCGAGAAAGGAAGGGAAGAAATTTTTTTTTTTTTTTAGCGATCCTAGGGCGATCA	0.07	0.09	0.63
693	GGGGACCAGGTGCCGTAAGTAATGACGGGAAGCCGGACAGGCAGCGACAGCCCTGACAGACAAGACTCTCCTAGCTGCGTTTTTTTTTTTTTTTGTCGCGTTCCTGAAACGCAGATTTTTTTTTTTTTTTTCGCGATCCTAGGGCGATCA	0.17	0.1	0.7
694	GGGGACCAGGTGCCGTAAGCAACTTGAGCAAGCCGGACAGGCAGCGACAGCCCTTTTTTTTTTTTTTTTCCTAGCTGCGTCCTCGTCTTCACCGGTCGCGTTCCTGAAACGCAGATTTTTTTTTTTTTTTTCGCGATCCTAGGGCGATCA	0.21	0.06	0.69
695	GGGGACCAGGTGCCGTAAGCAGATAGTGCATTTTTTTTTTTTTTTGACAGCCCTGACAGACAAGACTCTCCTAGCTGCGTCCTCGTCTTCACCGGTCGCGTTCCTGAAACGCAGATTTTTTTTTTTTTTTTCGCGATCCTAGGGCGATCA	0.23	0.11	0.74
696	GGGGACCAGGTGCCGTAAGGGTCCATGATGTTTTTTTTTTTTTTTCTAAAGGGAGCCCCCGATTTAGAGCTTGACGGGGTTTTTTTTTTTTTTTGGCGAGAAAGGAAGGGAAGAAAGCGCCACCTAGCGGAAGCGATCCTAGGGCGATCA	0.28	0.1	0.5
697	GGGGACCAGGTGCCGTAAGTATGAATCTAATTTTTTTTTTTTTTTGACAGCCCTGACAGACAAGACTCTCCTAGCTGCGTTTTTTTTTTTTTTTGTCGCGTTCCTGAAACGCAGATGTGCCTACAGCCGCACGCGATCCTAGGGCGATCA	0.33	0.12	0.81
698	GGGGACCAGGTGCCGTAAGAACGGGAGGGGCACTAAATCGGAACCCTAAAGGGAGCCCCCGATTTAGAGCTTGACGGGGAAAGCCGGCGAACGTGGCGAGAAAGGAAGGGAAGAACGGAAGACTCTCCTCCGGCGATCCTAGGGCGATCA	0.2	2.56	1.08
699	GGGGACCAGGTGCCGTAAGGTCTGGTTTAGCACTAAATCGGAACCCTAAAGGGAGCCCCCGATTTAGAGCTTGACGGGGAAAGCCGGCGAACGTGGCGAGAAAGGAAGGGAACGGAAGACTCTCCTCCGGAAGCGATCCTAGGGCGATCA	0.2	3.12	0.95
700	GGGGACCAGGTGCCGTAAGAGTTGCTGCAGCACTAAATCGGAACCCTAAAGGGAGCCCCCGATTTAGAGCTTGACGGGGAAAGCCGGCGAACGTGGCGAGAAAGGCGGAAGACTCTCCTCCGCCTAGCGGAAGCGATCCTAGGGCGATCA	0.4	1.2	1.1
701	GGGGACCAGGTGCCGTAAGACTTAGCTTGGCACTAAATCGGAACCCTAAAGGGAGCCCCCGATTTAGAGCTTGACGGGGAAAGCCGGCGAACGTGGCGAGAACGGAAGACTCTCCTCCGCCACCTAGCGGAAGCGATCCTAGGGCGATCA	0.21	1.37	0.99
702	GGGGACCAGGTGCCGTAAGAACTCTTCGCGCACTAAATCGGAACCCTAAAGGGAGCCCCCGATTTAGAGCTTGACGGGGAAAGCCGGCGAACGTGGCGCGGAAGACTCTCCTCCGAGCGCCACCTAGCGGAAGCGATCCTAGGGCGATCA	0.1	7.03	1.18
703	GGGGACCAGGTGCCGTAAGGTCTACTTAAGCACTAAATCGGAACCCTAAAGGGAGCCCCCGATTTAGAGCTTGACGGGGAAAGCCGGCGAACGTGGCGCGGAAGACTCTCCTCCGATTTTTTTTTTTTTTTAGCGATCCTAGGGCGATCA	0.22	4.15	0.97
704	GGGGACCAGGTGCCGTAAGCGTCCCAACTGCACTAAATCGGAACCCTAAAGGGAGCCCCCGATTTAGAGCTTGACGGGGAAAGCCGGCGAACGTGCGGAAGACTCTCCTCCGGAAAGCGCCACCTAGCGGAAGCGATCCTAGGGCGATCA	0.13	3.34	1.15
705	GGGGACCAGGTGCCGTAAGTCACCTAGAGGCACTAAATCGGAACCCTAAAGGGAGCCCCCGATTTAGAGCTTGACGGGGAAAGCCGGCGAACGTGCGGAAGACTCTCCTCCGGAAATTTTTTTTTTTTTTTAGCGATCCTAGGGCGATCA	0.19	3.52	0.92
706	GGGGACCAGGTGCCGTAAGCCTCGTGCATGCACTAAATCGGAACCCTAAAGGGAGCCCCCGATTTAGAGCTTGACGGGGAAAGCCGGCGAACGGAAGACTCTCCTCCGGGAAGAAAGCGCCACCTAGCGGAAGCGATCCTAGGGCGATCA	0.14	4.2	1.09
707	GGGGACCAGGTGCCGTAAGCAGGACACAGGCACTAAATCGGAACCCTAAAGGGAGCCCCCGATTTAGAGCTTGACGGGGAAAGCCGGCGAACGGAAGACTCTCCTCCGGGAAGAAATTTTTTTTTTTTTTTAGCGATCCTAGGGCGATCA	0.2	3.91	0.92
708	GGGGACCAGGTGCCGTAAGCCATTTAAGGGCACTAAATCGGAACCCTAAAGGGAGCCCCCGATTTAGAGCTTGACGGGGAAAGCCGGCCGGAAGACTCTCCTCCGAAGGGAAGAAAGCGCCACCTAGCGGAAGCGATCCTAGGGCGATCA	NaN	14.61	0.93
709	GGGGACCAGGTGCCGTAAGCGCCGGTCTCGCACTAAATCGGAACCCTAAAGGGAGCCCCCGATTTAGAGCTTGACGGGGAAAGCCGGCCGGAAGACTCTCCTCCGAAGGGAAGAAATTTTTTTTTTTTTTTAGCGATCCTAGGGCGATCA	0.12	10.22	0.86
710	GGGGACCAGGTGCCGTAAGCCGCGACTATGCACTAAATCGGAACCCTAAAGGGAGCCCCCGATTTAGAGCTTGACGGGGAAAGCCGGAAGACTCTCCTCCGAAGGAAGGGAAGAAAGCGCCACCTAGCGGAAGCGATCCTAGGGCGATCA	NaN	10.8	1.14
711	GGGGACCAGGTGCCGTAAGCGAAAGACTTGCACTAAATCGGAACCCTAAAGGGAGCCCCCGATTTAGAGCTTGACGGGGAAAGCCGGAAGACTCTCCTCCGAAGGAAGGGAAGAAATTTTTTTTTTTTTTTAGCGATCCTAGGGCGATCA	0.32	10.58	0.86
712	GGGGACCAGGTGCCGTAAGCTTAATGCCGGCACTAAATCGGAACCCTAAAGGGAGCCCCCGATTTAGAGCTTGACGGGGAACGGAAGACTCTCCTCCGAGAAAGGAAGGGAAGAAAGCGCCACCTAGCGGAAGCGATCCTAGGGCGATCA	0.46	6.84	1.01
713	GGGGACCAGGTGCCGTAAGTCAGGACTGTGCACTAAATCGGAACCCTAAAGGGAGCCCCCGATTTAGAGCTTGACGGGGAACGGAAGACTCTCCTCCGAGAAAGGAAGGGAAGAAATTTTTTTTTTTTTTTAGCGATCCTAGGGCGATCA	0.18	7.37	0.83
714	GGGGACCAGGTGCCGTAAGATTTGTGTACGCACTAAATCGGAACCCTAAAGGGAGCCCCCGATTTAGAGCTTGACGGCGGAAGACTCTCCTCCGGGCGAGAAAGGAAGGGAAGAAAGCGCCACCTAGCGGAAGCGATCCTAGGGCGATCA	NaN	3.12	1.27
715	GGGGACCAGGTGCCGTAAGATCCAGGACCGCACTAAATCGGAACCCTAAAGGGAGCCCCCGATTTAGAGCTTGACGGCGGAAGACTCTCCTCCGGGCGAGAAAGGAAGGGAAGAAATTTTTTTTTTTTTTTAGCGATCCTAGGGCGATCA	0.12	3.43	0.83
716	GGGGACCAGGTGCCGTAAGAGGAGCTGCGGCACTAAATCGGAACCCTAAAGGGAGCCCCCGATTTAGAGCTTGACGGAAGACTCTCCTCCGCGTGGCGAGAAAGGAAGGGAAGAAAGCGCCACCTAGCGGAAGCGATCCTAGGGCGATCA	0.28	1.7	0.95
717	GGGGACCAGGTGCCGTAAGCGACGTAAGAGCACTAAATCGGAACCCTAAAGGGAGCCCCCGATTTAGAGCTTGACGGAAGACTCTCCTCCGCGTGGCGAGAAAGGAAGGGAAGAAATTTTTTTTTTTTTTTAGCGATCCTAGGGCGATCA	0.2	1.83	0.94
718	GGGGACCAGGTGCCGTAAGCCGTCTTAGTGCACTAAATCGGAACCCTAAAGGGAGCCCCCGATTTAGAGCCGGAAGACTCTCCTCCGCGAACGTGGCGAGAAAGGAAGGGAAGAAAGCGCCACCTAGCGGAAGCGATCCTAGGGCGATCA	0.22	4.59	1.11
719	GGGGACCAGGTGCCGTAAGTCCAACTAGTGCACTAAATCGGAACCCTAAAGGGAGCCCCCGATTTAGAGCCGGAAGACTCTCCTCCGCGAACGTGGCGAGAAAGGAAGGGAAGAAATTTTTTTTTTTTTTTAGCGATCCTAGGGCGATCA	0.22	4.33	0.98
720	GGGGACCAGGTGCCGTAAGCCTGTCCTAAGCACTAAATCGGAACCCTAAAGGGAGCCCCCGATTTAGCGGAAGACTCTCCTCCGCGGCGAACGTGGCGAGAAAGGAAGGGAAGAAAGCGCCACCTAGCGGAAGCGATCCTAGGGCGATCA	0.2	2.78	0.96
721	GGGGACCAGGTGCCGTAAGTGTAAACCGTGCACTAAATCGGAACCCTAAAGGGAGCCCCCGATTTAGCGGAAGACTCTCCTCCGCGGCGAACGTGGCGAGAAAGGAAGGGAAGAAATTTTTTTTTTTTTTTAGCGATCCTAGGGCGATCA	0.05	1.66	0.97
722	GGGGACCAGGTGCCGTAAGGAAAGTGCGCGCACTAAATCGGAACCCTAAAGGGAGCCCCCGATCGGAAGACTCTCCTCCGAAGCCGGCGAACGTGGCGAGAAAGGAAGGGAAGAAAGCGCCACCTAGCGGAAGCGATCCTAGGGCGATCA	0.44	12.95	1.09
723	GGGGACCAGGTGCCGTAAGTCCAGGCTATGCACTAAATCGGAACCCTAAAGGGAGCCCCCGATCGGAAGACTCTCCTCCGAAGCCGGCGAACGTGGCGAGAAAGGAAGGGAAGAAATTTTTTTTTTTTTTTAGCGATCCTAGGGCGATCA	0.09	12.18	0.98
724	GGGGACCAGGTGCCGTAAGTAGACTGGTCGCACTAAATCGGAACCCTAAAGGGAGCCCCCCGGAAGACTCTCCTCCGGGAAAGCCGGCGAACGTGGCGAGAAAGGAAGGGAAGAAAGCGCCACCTAGCGGAAGCGATCCTAGGGCGATCA	NaN	5.89	1.24
725	GGGGACCAGGTGCCGTAAGGGTCTAAGACGCACTAAATCGGAACCCTAAAGGGAGCCCCCCGGAAGACTCTCCTCCGGGAAAGCCGGCGAACGTGGCGAGAAAGGAAGGGAAGAAATTTTTTTTTTTTTTTAGCGATCCTAGGGCGATCA	NaN	7.78	1.09
726	GGGGACCAGGTGCCGTAAGGAGGCCACGTGCACTAAATCGGAACCCTAAAGGGAGCCGGAAGACTCTCCTCCGACGGGGAAAGCCGGCGAACGTGGCGAGAAAGGAAGGGAAGAAAGCGCCACCTAGCGGAAGCGATCCTAGGGCGATCA	NaN	8.25	1.3
727	GGGGACCAGGTGCCGTAAGGTCGGTCCGCGCACTAAATCGGAACCCTAAAGGGAGCCGGAAGACTCTCCTCCGACGGGGAAAGCCGGCGAACGTGGCGAGAAAGGAAGGGAAGAAATTTTTTTTTTTTTTTAGCGATCCTAGGGCGATCA	0.07	10.47	0.96
728	GGGGACCAGGTGCCGTAAGCCACACACGGGCACTAAATCGGAACCCTAAAGGGCGGAAGACTCTCCTCCGTTGACGGGGAAAGCCGGCGAACGTGGCGAGAAAGGAAGGGAAGAAAGCGCCACCTAGCGGAAGCGATCCTAGGGCGATCA	NaN	1.66	1.19
729	GGGGACCAGGTGCCGTAAGGGTGACACTCGCACTAAATCGGAACCCTAAAGGGCGGAAGACTCTCCTCCGTTGACGGGGAAAGCCGGCGAACGTGGCGAGAAAGGAAGGGAAGAAATTTTTTTTTTTTTTTAGCGATCCTAGGGCGATCA	0.24	2.22	0.95
730	GGGGACCAGGTGCCGTAAGACCTAGCAGCGCACTAAATCGGAACCCTAAAGCGGAAGACTCTCCTCCGGCTTGACGGGGAAAGCCGGCGAACGTGGCGAGAAAGGAAGGGAAGAAAGCGCCACCTAGCGGAAGCGATCCTAGGGCGATCA	0.36	2.93	1.16
731	GGGGACCAGGTGCCGTAAGCCAGGTACAAGCACTAAATCGGAACCCTAAAGCGGAAGACTCTCCTCCGGCTTGACGGGGAAAGCCGGCGAACGTGGCGAGAAAGGAAGGGAAGAAATTTTTTTTTTTTTTTAGCGATCCTAGGGCGATCA	0.16	3.41	0.77
732	GGGGACCAGGTGCCGTAAGCTATGTGAAAGCACTAAATCGGAACCCTAACGGAAGACTCTCCTCCGGAGCTTGACGGGGAAAGCCGGCGAACGTGGCGAGAAAGGAAGGGAAGAAAGCGCCACCTAGCGGAAGCGATCCTAGGGCGATCA	NaN	NaN	1.07
733	GGGGACCAGGTGCCGTAAGTGTAACAAGGGCACTAAATCGGAACCCTAACGGAAGACTCTCCTCCGGAGCTTGACGGGGAAAGCCGGCGAACGTGGCGAGAAAGGAAGGGAAGAAATTTTTTTTTTTTTTTAGCGATCCTAGGGCGATCA	0.09	4.96	1.21
734	GGGGACCAGGTGCCGTAAGTAAACTGAGTGCACTAAATCGGAACCCCGGAAGACTCTCCTCCGTTAGAGCTTGACGGGGAAAGCCGGCGAACGTGGCGAGAAAGGAAGGGAAGAAAGCGCCACCTAGCGGAAGCGATCCTAGGGCGATCA	NaN	NaN	1.04
735	GGGGACCAGGTGCCGTAAGACTTACTCAGGCACTAAATCGGAACCCCGGAAGACTCTCCTCCGTTAGAGCTTGACGGGGAAAGCCGGCGAACGTGGCGAGAAAGGAAGGGAAGAAATTTTTTTTTTTTTTTAGCGATCCTAGGGCGATCA	0.15	4.32	1.05
736	GGGGACCAGGTGCCGTAAGGCTCAGCCCAGCACTAAATCGGAACCCGGAAGACTCTCCTCCGTTTAGAGCTTGACGGGGAAAGCCGGCGAACGTGGCGAGAAAGGAAGGGAAGAAAGCGCCACCTAGCGGAAGCGATCCTAGGGCGATCA	0.35	2.92	1.27
737	GGGGACCAGGTGCCGTAAGGTTCTTCGGGGCACTAAATCGGAACCCGGAAGACTCTCCTCCGTTTAGAGCTTGACGGGGAAAGCCGGCGAACGTGGCGAGAAAGGAAGGGAAGAAATTTTTTTTTTTTTTTAGCGATCCTAGGGCGATCA	0.1	3.2	1.18
738	GGGGACCAGGTGCCGTAAGGAATCGAGCTGCACTAAATCGGACGGAAGACTCTCCTCCGCGATTTAGAGCTTGACGGGGAAAGCCGGCGAACGTGGCGAGAAAGGAAGGGAAGAAAGCGCCACCTAGCGGAAGCGATCCTAGGGCGATCA	0.27	2.42	1.19
739	GGGGACCAGGTGCCGTAAGTCTGAAGACAGCACTAAATCGGACGGAAGACTCTCCTCCGCGATTTAGAGCTTGACGGGGAAAGCCGGCGAACGTGGCGAGAAAGGAAGGGAAGAAATTTTTTTTTTTTTTTAGCGATCCTAGGGCGATCA	0.16	2.61	0.93
740	GGGGACCAGGTGCCGTAAGTGGTGAATAGGCACTAAATCCGGAAGACTCTCCTCCGCCCCGATTTAGAGCTTGACGGGGAAAGCCGGCGAACGTGGCGAGAAAGGAAGGGAAGAAAGCGCCACCTAGCGGAAGCGATCCTAGGGCGATCA	0.33	2.98	1.08
741	GGGGACCAGGTGCCGTAAGAACCTACCTCGCACTAAATCCGGAAGACTCTCCTCCGCCCCGATTTAGAGCTTGACGGGGAAAGCCGGCGAACGTGGCGAGAAAGGAAGGGAAGAAATTTTTTTTTTTTTTTAGCGATCCTAGGGCGATCA	0.05	3.87	0.97
742	GGGGACCAGGTGCCGTAAGGTCTGAACCGGCACTACGGAAGACTCTCCTCCGGAGCCCCCGATTTAGAGCTTGACGGGGAAAGCCGGCGAACGTGGCGAGAAAGGAAGGGAAGAAAGCGCCACCTAGCGGAAGCGATCCTAGGGCGATCA	NaN	4.57	1.18
743	GGGGACCAGGTGCCGTAAGAATACTCTTTGCACTACGGAAGACTCTCCTCCGGAGCCCCCGATTTAGAGCTTGACGGGGAAAGCCGGCGAACGTGGCGAGAAAGGAAGGGAAGAAATTTTTTTTTTTTTTTAGCGATCCTAGGGCGATCA	0.12	5.4	1.14
744	GGGGACCAGGTGCCGTAAGCAACTAACATGCACGGAAGACTCTCCTCCGAGGGAGCCCCCGATTTAGAGCTTGACGGGGAAAGCCGGCGAACGTGGCGAGAAAGGAAGGGAAGAAAGCGCCACCTAGCGGAAGCGATCCTAGGGCGATCA	0.34	6.44	1.27
745	GGGGACCAGGTGCCGTAAGTTGTAGAGAGGCACGGAAGACTCTCCTCCGAGGGAGCCCCCGATTTAGAGCTTGACGGGGAAAGCCGGCGAACGTGGCGAGAAAGGAAGGGAAGAAATTTTTTTTTTTTTTTAGCGATCCTAGGGCGATCA	0.16	7.85	1.03
746	GGGGACCAGGTGCCGTAAGTGTAGTTCGCGCACTAAATCGGAACCCTAAAGGGAGCCCCCGATTTAGAGCTTGACGGGGAAAGCCGGCGAACGTGGCGAGAAAGGAAGGGAAGAAAGCGCCACATGACTCATGCGATCCTAGGGCGATCA	0.79	0.08	0.96
747	GGGGACCAGGTGCCGTAAGACCTAGAGTCGCACTAAATCGGAACCCTAAAGGGAGCCCCCGATTTAGAGCTTGACGGGGAAAGCCGGCGAACGTGGCGAGAAAGGAAGGGAAGAAAGCGCATGACTCATGAAGCGATCCTAGGGCGATCA	0.68	0.08	1.18
748	GGGGACCAGGTGCCGTAAGGCAATTCTGGGCACTAAATCGGAACCCTAAAGGGAGCCCCCGATTTAGAGCTTGACGGGGAAAGCCGGCGAACGTGGCGAGAAAGGAAGGGAAGATGACTCATCCTAGCGGAAGCGATCCTAGGGCGATCA	NaN	0.09	0.99
749	GGGGACCAGGTGCCGTAAGGCGGGACAGTGCACTAAATCGGAACCCTAAAGGGAGCCCCCGATTTAGAGCTTGACGGGGAAAGCCGGCGAACGTGGCGAGAAAGGAAGGGATGACTCATCCACCTAGCGGAAGCGATCCTAGGGCGATCA	NaN	0.04	1.09
750	GGGGACCAGGTGCCGTAAGAATGCGGACGGCACTAAATCGGAACCCTAAAGGGAGCCCCCGATTTAGAGCTTGACGGGGAAAGCCGGCGAACGTGGCGAGAAAGGAATGACTCATAGCGCCACCTAGCGGAAGCGATCCTAGGGCGATCA	1.64	0.17	1.15
751	GGGGACCAGGTGCCGTAAGCGCCGAAGCAGCACTAAATCGGAACCCTAAAGGGAGCCCCCGATTTAGAGCTTGACGGGGAAAGCCGGCGAACGTGGCGAGAAAGGAATGACTCATATTTTTTTTTTTTTTTAGCGATCCTAGGGCGATCA	1.63	0.27	0.79
752	GGGGACCAGGTGCCGTAAGGCAGTCAGACGCACTAAATCGGAACCCTAAAGGGAGCCCCCGATTTAGAGCTTGACGGGGAAAGCCGGCGAACGTGGCGAGAAAATGACTCATGAAAGCGCCACCTAGCGGAAGCGATCCTAGGGCGATCA	0.57	0.09	0.91
753	GGGGACCAGGTGCCGTAAGCGCTGAGTATGCACTAAATCGGAACCCTAAAGGGAGCCCCCGATTTAGAGCTTGACGGGGAAAGCCGGCGAACGTGGCGAGAAAATGACTCATGAAATTTTTTTTTTTTTTTAGCGATCCTAGGGCGATCA	0.73	0.15	0.74
754	GGGGACCAGGTGCCGTAAGAAGGCGGTGAGCACTAAATCGGAACCCTAAAGGGAGCCCCCGATTTAGAGCTTGACGGGGAAAGCCGGCGAACGTGGCGAATGACTCATGGAAGAAAGCGCCACCTAGCGGAAGCGATCCTAGGGCGATCA	0.9	0.08	0.96
755	GGGGACCAGGTGCCGTAAGCGCTGGTCAAGCACTAAATCGGAACCCTAAAGGGAGCCCCCGATTTAGAGCTTGACGGGGAAAGCCGGCGAACGTGGCGAATGACTCATGGAAGAAATTTTTTTTTTTTTTTAGCGATCCTAGGGCGATCA	0.59	0.09	0.94
756	GGGGACCAGGTGCCGTAAGACAATCTAAGGCACTAAATCGGAACCCTAAAGGGAGCCCCCGATTTAGAGCTTGACGGGGAAAGCCGGCGAACGTGGATGACTCATAAGGGAAGAAAGCGCCACCTAGCGGAAGCGATCCTAGGGCGATCA	NaN	0.15	1.01
757	GGGGACCAGGTGCCGTAAGACCCACTGGAGCACTAAATCGGAACCCTAAAGGGAGCCCCCGATTTAGAGCTTGACGGGGAAAGCCGGCGAACGTGGATGACTCATAAGGGAAGAAATTTTTTTTTTTTTTTAGCGATCCTAGGGCGATCA	1.82	0.14	0.83
758	GGGGACCAGGTGCCGTAAGCTTGAGCTGGGCACTAAATCGGAACCCTAAAGGGAGCCCCCGATTTAGAGCTTGACGGGGAAAGCCGGCGAACATGACTCATAAGGAAGGGAAGAAAGCGCCACCTAGCGGAAGCGATCCTAGGGCGATCA	0.97	0.1	0.93
759	GGGGACCAGGTGCCGTAAGACACCTCGGCGCACTAAATCGGAACCCTAAAGGGAGCCCCCGATTTAGAGCTTGACGGGGAAAGCCGGCGAACATGACTCATAAGGAAGGGAAGAAATTTTTTTTTTTTTTTAGCGATCCTAGGGCGATCA	0.9	0.17	0.8
760	GGGGACCAGGTGCCGTAAGCCCGCTACCGGCACTAAATCGGAACCCTAAAGGGAGCCCCCGATTTAGAGCTTGACGGGGAAAGCCGGCGATGACTCATAGAAAGGAAGGGAAGAAAGCGCCACCTAGCGGAAGCGATCCTAGGGCGATCA	2.52	0.08	1.07
761	GGGGACCAGGTGCCGTAAGGCTACATTTTGCACTAAATCGGAACCCTAAAGGGAGCCCCCGATTTAGAGCTTGACGGGGAAAGCCGGCGATGACTCATAGAAAGGAAGGGAAGAAATTTTTTTTTTTTTTTAGCGATCCTAGGGCGATCA	1.69	0.5	1.01
762	GGGGACCAGGTGCCGTAAGGGATTCAATTGCACTAAATCGGAACCCTAAAGGGAGCCCCCGATTTAGAGCTTGACGGGGAAAGCCATGACTCATGGCGAGAAAGGAAGGGAAGAAAGCGCCACCTAGCGGAAGCGATCCTAGGGCGATCA	NaN	NaN	1.21
763	GGGGACCAGGTGCCGTAAGCGTCACGGACGCACTAAATCGGAACCCTAAAGGGAGCCCCCGATTTAGAGCTTGACGGGGAAAGCCATGACTCATGGCGAGAAAGGAAGGGAAGAAATTTTTTTTTTTTTTTAGCGATCCTAGGGCGATCA	NaN	0.52	0.9
764	GGGGACCAGGTGCCGTAAGTACGTCAGGTGCACTAAATCGGAACCCTAAAGGGAGCCCCCGATTTAGAGCTTGACGGGGAAAATGACTCATCGTGGCGAGAAAGGAAGGGAAGAAAGCGCCACCTAGCGGAAGCGATCCTAGGGCGATCA	NaN	0.06	0.65
765	GGGGACCAGGTGCCGTAAGGCTGAGCACTGCACTAAATCGGAACCCTAAAGGGAGCCCCCGATTTAGAGCTTGACGGGGAAAATGACTCATCGTGGCGAGAAAGGAAGGGAAGAAATTTTTTTTTTTTTTTAGCGATCCTAGGGCGATCA	1.43	0.12	0.72
766	GGGGACCAGGTGCCGTAAGTGTACATGACGCACTAAATCGGAACCCTAAAGGGAGCCCCCGATTTAGAGCTTGACGGGATGACTCATCGAACGTGGCGAGAAAGGAAGGGAAGAAAGCGCCACCTAGCGGAAGCGATCCTAGGGCGATCA	1.56	0.07	1.13
767	GGGGACCAGGTGCCGTAAGAGTCGCTGGTGCACTAAATCGGAACCCTAAAGGGAGCCCCCGATTTAGAGCTTGACGGGATGACTCATCGAACGTGGCGAGAAAGGAAGGGAAGAAATTTTTTTTTTTTTTTAGCGATCCTAGGGCGATCA	1.95	0.05	0.84
768	GGGGACCAGGTGCCGTAAGACAGAGGTGCGCACTAAATCGGAACCCTAAAGGGAGCCCCCGATTTAGAGCTTGACATGACTCATCGGCGAACGTGGCGAGAAAGGAAGGGAAGAAAGCGCCACCTAGCGGAAGCGATCCTAGGGCGATCA	1.28	0.12	1.11
769	GGGGACCAGGTGCCGTAAGACGTAGTACCGCACTAAATCGGAACCCTAAAGGGAGCCCCCGATTTAGAGCTTGACATGACTCATCGGCGAACGTGGCGAGAAAGGAAGGGAAGAAATTTTTTTTTTTTTTTAGCGATCCTAGGGCGATCA	1.15	0.07	0.98
770	GGGGACCAGGTGCCGTAAGTCTGCAACACGCACTAAATCGGAACCCTAAAGGGAGCCCCCGATTTAGAGCTATGACTCATAAGCCGGCGAACGTGGCGAGAAAGGAAGGGAAGAAAGCGCCACCTAGCGGAAGCGATCCTAGGGCGATCA	2.48	0.08	1.09
771	GGGGACCAGGTGCCGTAAGTAGGATCGTCGCACTAAATCGGAACCCTAAAGGGAGCCCCCGATTTAGAGCTATGACTCATAAGCCGGCGAACGTGGCGAGAAAGGAAGGGAAGAAATTTTTTTTTTTTTTTAGCGATCCTAGGGCGATCA	2.34	0.14	1.02
772	GGGGACCAGGTGCCGTAAGTTCATACGCTGCACTAAATCGGAACCCTAAAGGGAGCCCCCGATTTAGAATGACTCATGGAAAGCCGGCGAACGTGGCGAGAAAGGAAGGGAAGAAAGCGCCACCTAGCGGAAGCGATCCTAGGGCGATCA	NaN	0.17	1.3
773	GGGGACCAGGTGCCGTAAGGCGTAGTTCTGCACTAAATCGGAACCCTAAAGGGAGCCCCCGATTTAGAATGACTCATGGAAAGCCGGCGAACGTGGCGAGAAAGGAAGGGAAGAAATTTTTTTTTTTTTTTAGCGATCCTAGGGCGATCA	0.49	0.08	1.07
774	GGGGACCAGGTGCCGTAAGAGTCTTGTAGGCACTAAATCGGAACCCTAAAGGGAGCCCCCGATTATGACTCATACGGGGAAAGCCGGCGAACGTGGCGAGAAAGGAAGGGAAGAAAGCGCCACCTAGCGGAAGCGATCCTAGGGCGATCA	NaN	NaN	1.07
775	GGGGACCAGGTGCCGTAAGTGACTGGGATGCACTAAATCGGAACCCTAAAGGGAGCCCCCGATTATGACTCATACGGGGAAAGCCGGCGAACGTGGCGAGAAAGGAAGGGAAGAAATTTTTTTTTTTTTTTAGCGATCCTAGGGCGATCA	2.32	0.16	1.04
776	GGGGACCAGGTGCCGTAAGCCAAACGAGAGCACTAAATCGGAACCCTAAAGGGAGCCCCCGATGACTCATTTGACGGGGAAAGCCGGCGAACGTGGCGAGAAAGGAAGGGAAGAAAGCGCCACCTAGCGGAAGCGATCCTAGGGCGATCA	NaN	0.12	0.94
777	GGGGACCAGGTGCCGTAAGTCTTTTAGGGGCACTAAATCGGAACCCTAAAGGGAGCCCCCGATGACTCATTTGACGGGGAAAGCCGGCGAACGTGGCGAGAAAGGAAGGGAAGAAATTTTTTTTTTTTTTTAGCGATCCTAGGGCGATCA	1.16	0.31	0.9
778	GGGGACCAGGTGCCGTAAGGAGCGAGTCGGCACTAAATCGGAACCCTAAAGGGAGCCCCATGACTCATGCTTGACGGGGAAAGCCGGCGAACGTGGCGAGAAAGGAAGGGAAGAAAGCGCCACCTAGCGGAAGCGATCCTAGGGCGATCA	0.8	0.08	1.31
779	GGGGACCAGGTGCCGTAAGACCTGTTCGTGCACTAAATCGGAACCCTAAAGGGAGCCCCATGACTCATGCTTGACGGGGAAAGCCGGCGAACGTGGCGAGAAAGGAAGGGAAGAAATTTTTTTTTTTTTTTAGCGATCCTAGGGCGATCA	0.81	0.18	0.98
780	GGGGACCAGGTGCCGTAAGACAGGCTTACGCACTAAATCGGAACCCTAAAGGGAGCCATGACTCATGAGCTTGACGGGGAAAGCCGGCGAACGTGGCGAGAAAGGAAGGGAAGAAAGCGCCACCTAGCGGAAGCGATCCTAGGGCGATCA	NaN	0.04	1.38
781	GGGGACCAGGTGCCGTAAGTGAACCCTTTGCACTAAATCGGAACCCTAAAGGGAGCCATGACTCATGAGCTTGACGGGGAAAGCCGGCGAACGTGGCGAGAAAGGAAGGGAAGAAATTTTTTTTTTTTTTTAGCGATCCTAGGGCGATCA	0.45	0.12	1
782	GGGGACCAGGTGCCGTAAGAACTAATTAGGCACTAAATCGGAACCCTAAAGGGAATGACTCATTTAGAGCTTGACGGGGAAAGCCGGCGAACGTGGCGAGAAAGGAAGGGAAGAAAGCGCCACCTAGCGGAAGCGATCCTAGGGCGATCA	NaN	NaN	NaN
783	GGGGACCAGGTGCCGTAAGGACGGCGATCGCACTAAATCGGAACCCTAAAGGGAATGACTCATTTAGAGCTTGACGGGGAAAGCCGGCGAACGTGGCGAGAAAGGAAGGGAAGAAATTTTTTTTTTTTTTTAGCGATCCTAGGGCGATCA	1	0.09	0.81
784	GGGGACCAGGTGCCGTAAGCAACTGACTCGCACTAAATCGGAACCCTAAAGGGATGACTCATTTTAGAGCTTGACGGGGAAAGCCGGCGAACGTGGCGAGAAAGGAAGGGAAGAAAGCGCCACCTAGCGGAAGCGATCCTAGGGCGATCA	NaN	0.07	1.17
785	GGGGACCAGGTGCCGTAAGATTTACCGTCGCACTAAATCGGAACCCTAAAGGGATGACTCATTTTAGAGCTTGACGGGGAAAGCCGGCGAACGTGGCGAGAAAGGAAGGGAAGAAATTTTTTTTTTTTTTTAGCGATCCTAGGGCGATCA	1.97	0.11	1.02
786	GGGGACCAGGTGCCGTAAGAGGCCCTTTCGCACTAAATCGGAACCCTAAAATGACTCATCGATTTAGAGCTTGACGGGGAAAGCCGGCGAACGTGGCGAGAAAGGAAGGGAAGAAAGCGCCACCTAGCGGAAGCGATCCTAGGGCGATCA	1.73	0.08	1.01
787	GGGGACCAGGTGCCGTAAGTTGAGTATCGGCACTAAATCGGAACCCTAAAATGACTCATCGATTTAGAGCTTGACGGGGAAAGCCGGCGAACGTGGCGAGAAAGGAAGGGAAGAAATTTTTTTTTTTTTTTAGCGATCCTAGGGCGATCA	1.53	0.12	0.96
788	GGGGACCAGGTGCCGTAAGGATTGCCGTAGCACTAAATCGGAACCCTATGACTCATCCCCGATTTAGAGCTTGACGGGGAAAGCCGGCGAACGTGGCGAGAAAGGAAGGGAAGAAAGCGCCACCTAGCGGAAGCGATCCTAGGGCGATCA	2.33	0.27	1.15
789	GGGGACCAGGTGCCGTAAGCAGTCACAGAGCACTAAATCGGAACCCTATGACTCATCCCCGATTTAGAGCTTGACGGGGAAAGCCGGCGAACGTGGCGAGAAAGGAAGGGAAGAAATTTTTTTTTTTTTTTAGCGATCCTAGGGCGATCA	2.54	0.23	1.06
790	GGGGACCAGGTGCCGTAAGCGTGCGTTGGGCACTAAATCGGAAATGACTCATGAGCCCCCGATTTAGAGCTTGACGGGGAAAGCCGGCGAACGTGGCGAGAAAGGAAGGGAAGAAAGCGCCACCTAGCGGAAGCGATCCTAGGGCGATCA	0.61	0.07	1
791	GGGGACCAGGTGCCGTAAGGATTCGCATAGCACTAAATCGGAAATGACTCATGAGCCCCCGATTTAGAGCTTGACGGGGAAAGCCGGCGAACGTGGCGAGAAAGGAAGGGAAGAAATTTTTTTTTTTTTTTAGCGATCCTAGGGCGATCA	0.49	0.25	1.05
792	GGGGACCAGGTGCCGTAAGCGCAAAGCCTGCACTAAATCGATGACTCATAGGGAGCCCCCGATTTAGAGCTTGACGGGGAAAGCCGGCGAACGTGGCGAGAAAGGAAGGGAAGAAAGCGCCACCTAGCGGAAGCGATCCTAGGGCGATCA	2.68	0.1	1.23
793	GGGGACCAGGTGCCGTAAGCGGCGTAGTAGCACTAAATCGATGACTCATAGGGAGCCCCCGATTTAGAGCTTGACGGGGAAAGCCGGCGAACGTGGCGAGAAAGGAAGGGAAGAAATTTTTTTTTTTTTTTAGCGATCCTAGGGCGATCA	2.95	0.04	0.92
794	GGGGACCAGGTGCCGTAAGGCCTATGCGAGCACTAAATGACTCATCTAAAGGGAGCCCCCGATTTAGAGCTTGACGGGGAAAGCCGGCGAACGTGGCGAGAAAGGAAGGGAAGAAAGCGCCACCTAGCGGAAGCGATCCTAGGGCGATCA	1.48	0.41	1.01
795	GGGGACCAGGTGCCGTAAGCTCCAAGTATGCACTAAATGACTCATCTAAAGGGAGCCCCCGATTTAGAGCTTGACGGGGAAAGCCGGCGAACGTGGCGAGAAAGGAAGGGAAGAAATTTTTTTTTTTTTTTAGCGATCCTAGGGCGATCA	0.97	0.13	0.93
796	GGGGACCAGGTGCCGTAAGAGTGACGACCGCAATGACTCATAACCCTAAAGGGAGCCCCCGATTTAGAGCTTGACGGGGAAAGCCGGCGAACGTGGCGAGAAAGGAAGGGAAGAAAGCGCCACCTAGCGGAAGCGATCCTAGGGCGATCA	NaN	0.14	1.03
797	GGGGACCAGGTGCCGTAAGGTGGACAGGCGCAATGACTCATAACCCTAAAGGGAGCCCCCGATTTAGAGCTTGACGGGGAAAGCCGGCGAACGTGGCGAGAAAGGAAGGGAAGAAATTTTTTTTTTTTTTTAGCGATCCTAGGGCGATCA	1.73	0.09	0.92
798	GGGGACCAGGTGCCGTAAGACAGTCCGCTGCACTAAATCGGAACCCTAAAGGGAGCCCCCGATTTAGAGCTTGACGGGGAAAGCCGGCGAACGTGGCGAGAAAGGAAGGGAAGAAAGCGCGCCGGAACCGGCGCGATCCTAGGGCGATCA	NaN	NaN	NaN
799	GGGGACCAGGTGCCGTAAGTGTCGCACTAGCACTAAATCGGAACCCTAAAGGGAGCCCCCGATTTAGAGCTTGACGGGGAAAGCCGGCGAACGTGGCGAGAAAGGAAGGGAAGAAAGGCCGGAACCGGCGAAGCGATCCTAGGGCGATCA	0.26	0.09	0.95
800	GGGGACCAGGTGCCGTAAGCGTAGCTCGGGCACTAAATCGGAACCCTAAAGGGAGCCCCCGATTTAGAGCTTGACGGGGAAAGCCGGCGAACGTGGCGAGAAAGGAAGGGGCCGGAACCGGCCCTAGCGGAAGCGATCCTAGGGCGATCA	NaN	0.11	0.94
801	GGGGACCAGGTGCCGTAAGGTCCAGGAGAGCACTAAATCGGAACCCTAAAGGGAGCCCCCGATTTAGAGCTTGACGGGGAAAGCCGGCGAACGTGGCGAGAAAGGAAGCCGGAACCGGCCCACCTAGCGGAAGCGATCCTAGGGCGATCA	NaN	0.18	1.18
802	GGGGACCAGGTGCCGTAAGGAGTCGAGTCGCACTAAATCGGAACCCTAAAGGGAGCCCCCGATTTAGAGCTTGACGGGGAAAGCCGGCGAACGTGGCGAGAAAGCCGGAACCGGCAGCGCCACCTAGCGGAAGCGATCCTAGGGCGATCA	0.34	0.14	1.23
803	GGGGACCAGGTGCCGTAAGCTGCAACTTAGCACTAAATCGGAACCCTAAAGGGAGCCCCCGATTTAGAGCTTGACGGGGAAAGCCGGCGAACGTGGCGAGAAAGCCGGAACCGGCATTTTTTTTTTTTTTTAGCGATCCTAGGGCGATCA	0.21	0.21	0.85
804	GGGGACCAGGTGCCGTAAGCCTTTAGCCAGCACTAAATCGGAACCCTAAAGGGAGCCCCCGATTTAGAGCTTGACGGGGAAAGCCGGCGAACGTGGCGAGGCCGGAACCGGCGAAAGCGCCACCTAGCGGAAGCGATCCTAGGGCGATCA	0.23	0.09	1.22
805	GGGGACCAGGTGCCGTAAGGAAAGCCGATGCACTAAATCGGAACCCTAAAGGGAGCCCCCGATTTAGAGCTTGACGGGGAAAGCCGGCGAACGTGGCGAGGCCGGAACCGGCGAAATTTTTTTTTTTTTTTAGCGATCCTAGGGCGATCA	0.14	0.09	1.03
806	GGGGACCAGGTGCCGTAAGATGGACTTCGGCACTAAATCGGAACCCTAAAGGGAGCCCCCGATTTAGAGCTTGACGGGGAAAGCCGGCGAACGTGGGCCGGAACCGGCGGAAGAAAGCGCCACCTAGCGGAAGCGATCCTAGGGCGATCA	0.1	0.24	0.92
807	GGGGACCAGGTGCCGTAAGACTGAGGTAGGCACTAAATCGGAACCCTAAAGGGAGCCCCCGATTTAGAGCTTGACGGGGAAAGCCGGCGAACGTGGGCCGGAACCGGCGGAAGAAATTTTTTTTTTTTTTTAGCGATCCTAGGGCGATCA	0.09	0.18	0.96
808	GGGGACCAGGTGCCGTAAGTAGCTTGCTGGCACTAAATCGGAACCCTAAAGGGAGCCCCCGATTTAGAGCTTGACGGGGAAAGCCGGCGAACGGCCGGAACCGGCAAGGGAAGAAAGCGCCACCTAGCGGAAGCGATCCTAGGGCGATCA	0.15	0.21	0.98
809	GGGGACCAGGTGCCGTAAGAGAGCGAGAAGCACTAAATCGGAACCCTAAAGGGAGCCCCCGATTTAGAGCTTGACGGGGAAAGCCGGCGAACGGCCGGAACCGGCAAGGGAAGAAATTTTTTTTTTTTTTTAGCGATCCTAGGGCGATCA	0.17	0.14	0.93
810	GGGGACCAGGTGCCGTAAGGGCGCAAGCAGCACTAAATCGGAACCCTAAAGGGAGCCCCCGATTTAGAGCTTGACGGGGAAAGCCGGCGGCCGGAACCGGCAAGGAAGGGAAGAAAGCGCCACCTAGCGGAAGCGATCCTAGGGCGATCA	NaN	0.16	1
811	GGGGACCAGGTGCCGTAAGGGATACAGACGCACTAAATCGGAACCCTAAAGGGAGCCCCCGATTTAGAGCTTGACGGGGAAAGCCGGCGGCCGGAACCGGCAAGGAAGGGAAGAAATTTTTTTTTTTTTTTAGCGATCCTAGGGCGATCA	0.13	0.2	0.96
812	GGGGACCAGGTGCCGTAAGACCTTGTCGAGCACTAAATCGGAACCCTAAAGGGAGCCCCCGATTTAGAGCTTGACGGGGAAAGCCGGCCGGAACCGGCAGAAAGGAAGGGAAGAAAGCGCCACCTAGCGGAAGCGATCCTAGGGCGATCA	NaN	0.15	0.84
813	GGGGACCAGGTGCCGTAAGTCGGCACTACGCACTAAATCGGAACCCTAAAGGGAGCCCCCGATTTAGAGCTTGACGGGGAAAGCCGGCCGGAACCGGCAGAAAGGAAGGGAAGAAATTTTTTTTTTTTTTTAGCGATCCTAGGGCGATCA	NaN	0.16	0.95
814	GGGGACCAGGTGCCGTAAGCCGAAGTTGTGCACTAAATCGGAACCCTAAAGGGAGCCCCCGATTTAGAGCTTGACGGGGAAAGCCGGAACCGGCGGCGAGAAAGGAAGGGAAGAAAGCGCCACCTAGCGGAAGCGATCCTAGGGCGATCA	0.52	0.06	1
815	GGGGACCAGGTGCCGTAAGCTGCTGTGCGGCACTAAATCGGAACCCTAAAGGGAGCCCCCGATTTAGAGCTTGACGGGGAAAGCCGGAACCGGCGGCGAGAAAGGAAGGGAAGAAATTTTTTTTTTTTTTTAGCGATCCTAGGGCGATCA	0.18	0.13	0.94
816	GGGGACCAGGTGCCGTAAGTTACACTGTCGCACTAAATCGGAACCCTAAAGGGAGCCCCCGATTTAGAGCTTGACGGGGGCCGGAACCGGCCGTGGCGAGAAAGGAAGGGAAGAAAGCGCCACCTAGCGGAAGCGATCCTAGGGCGATCA	0.34	0.09	1.07
817	GGGGACCAGGTGCCGTAAGCGATCCAGAGGCACTAAATCGGAACCCTAAAGGGAGCCCCCGATTTAGAGCTTGACGGGGGCCGGAACCGGCCGTGGCGAGAAAGGAAGGGAAGAAATTTTTTTTTTTTTTTAGCGATCCTAGGGCGATCA	0.17	0.12	0.73
818	GGGGACCAGGTGCCGTAAGTTAGACCCTGGCACTAAATCGGAACCCTAAAGGGAGCCCCCGATTTAGAGCTTGACGCCGGAACCGGCCGAACGTGGCGAGAAAGGAAGGGAAGAAAGCGCCACCTAGCGGAAGCGATCCTAGGGCGATCA	NaN	0.11	1.08
819	GGGGACCAGGTGCCGTAAGGTTAGTACCTGCACTAAATCGGAACCCTAAAGGGAGCCCCCGATTTAGAGCTTGACGCCGGAACCGGCCGAACGTGGCGAGAAAGGAAGGGAAGAAATTTTTTTTTTTTTTTAGCGATCCTAGGGCGATCA	0.13	0.13	0.99
820	GGGGACCAGGTGCCGTAAGTGATCGTGCGGCACTAAATCGGAACCCTAAAGGGAGCCCCCGATTTAGAGCTTGCCGGAACCGGCCGGCGAACGTGGCGAGAAAGGAAGGGAAGAAAGCGCCACCTAGCGGAAGCGATCCTAGGGCGATCA	0.21	0.14	1.03
821	GGGGACCAGGTGCCGTAAGCCTATTGCCTGCACTAAATCGGAACCCTAAAGGGAGCCCCCGATTTAGAGCTTGCCGGAACCGGCCGGCGAACGTGGCGAGAAAGGAAGGGAAGAAATTTTTTTTTTTTTTTAGCGATCCTAGGGCGATCA	0.11	0.12	1.04
822	GGGGACCAGGTGCCGTAAGTGAGTACGCCGCACTAAATCGGAACCCTAAAGGGAGCCCCCGATTTAGAGCCGGAACCGGCAAGCCGGCGAACGTGGCGAGAAAGGAAGGGAAGAAAGCGCCACCTAGCGGAAGCGATCCTAGGGCGATCA	0.36	0.12	1.15
823	GGGGACCAGGTGCCGTAAGGTTGTAGTATGCACTAAATCGGAACCCTAAAGGGAGCCCCCGATTTAGAGCCGGAACCGGCAAGCCGGCGAACGTGGCGAGAAAGGAAGGGAAGAAATTTTTTTTTTTTTTTAGCGATCCTAGGGCGATCA	0.19	0.1	0.97
824	GGGGACCAGGTGCCGTAAGACTAAATACGGCACTAAATCGGAACCCTAAAGGGAGCCCCCGATTTGCCGGAACCGGCGGAAAGCCGGCGAACGTGGCGAGAAAGGAAGGGAAGAAAGCGCCACCTAGCGGAAGCGATCCTAGGGCGATCA	NaN	0.06	1.04
825	GGGGACCAGGTGCCGTAAGACGGGAGGTTGCACTAAATCGGAACCCTAAAGGGAGCCCCCGATTTGCCGGAACCGGCGGAAAGCCGGCGAACGTGGCGAGAAAGGAAGGGAAGAAATTTTTTTTTTTTTTTAGCGATCCTAGGGCGATCA	0.09	0.07	0.83
826	GGGGACCAGGTGCCGTAAGAGTGGTGCTGGCACTAAATCGGAACCCTAAAGGGAGCCCCCGGCCGGAACCGGCACGGGGAAAGCCGGCGAACGTGGCGAGAAAGGAAGGGAAGAAAGCGCCACCTAGCGGAAGCGATCCTAGGGCGATCA	NaN	0.32	1.12
827	GGGGACCAGGTGCCGTAAGAAATCAGCAAGCACTAAATCGGAACCCTAAAGGGAGCCCCCGGCCGGAACCGGCACGGGGAAAGCCGGCGAACGTGGCGAGAAAGGAAGGGAAGAAATTTTTTTTTTTTTTTAGCGATCCTAGGGCGATCA	0.2	0.35	1.11
828	GGGGACCAGGTGCCGTAAGAGAACAGGGAGCACTAAATCGGAACCCTAAAGGGAGCCCGCCGGAACCGGCTTGACGGGGAAAGCCGGCGAACGTGGCGAGAAAGGAAGGGAAGAAAGCGCCACCTAGCGGAAGCGATCCTAGGGCGATCA	0.15	0.1	0.95
829	GGGGACCAGGTGCCGTAAGCCCTCACGAGGCACTAAATCGGAACCCTAAAGGGAGCCCGCCGGAACCGGCTTGACGGGGAAAGCCGGCGAACGTGGCGAGAAAGGAAGGGAAGAAATTTTTTTTTTTTTTTAGCGATCCTAGGGCGATCA	0.11	0.09	0.9
830	GGGGACCAGGTGCCGTAAGATCGGGATATGCACTAAATCGGAACCCTAAAGGGAGCGCCGGAACCGGCGCTTGACGGGGAAAGCCGGCGAACGTGGCGAGAAAGGAAGGGAAGAAAGCGCCACCTAGCGGAAGCGATCCTAGGGCGATCA	NaN	0.08	1.18
831	GGGGACCAGGTGCCGTAAGGCGTGTCCCAGCACTAAATCGGAACCCTAAAGGGAGCGCCGGAACCGGCGCTTGACGGGGAAAGCCGGCGAACGTGGCGAGAAAGGAAGGGAAGAAATTTTTTTTTTTTTTTAGCGATCCTAGGGCGATCA	0.13	0.12	0.96
832	GGGGACCAGGTGCCGTAAGATGTATGTAGGCACTAAATCGGAACCCTAAAGGGAGCCGGAACCGGCGAGCTTGACGGGGAAAGCCGGCGAACGTGGCGAGAAAGGAAGGGAAGAAAGCGCCACCTAGCGGAAGCGATCCTAGGGCGATCA	0.31	0.11	1.2
833	GGGGACCAGGTGCCGTAAGTAAGACGTCCGCACTAAATCGGAACCCTAAAGGGAGCCGGAACCGGCGAGCTTGACGGGGAAAGCCGGCGAACGTGGCGAGAAAGGAAGGGAAGAAATTTTTTTTTTTTTTTAGCGATCCTAGGGCGATCA	0.15	0.12	1.11
834	GGGGACCAGGTGCCGTAAGCTGTAGGCAAGCACTAAATCGGAACCCTAAAGGCCGGAACCGGCTTAGAGCTTGACGGGGAAAGCCGGCGAACGTGGCGAGAAAGGAAGGGAAGAAAGCGCCACCTAGCGGAAGCGATCCTAGGGCGATCA	0.64	0.48	1.28
835	GGGGACCAGGTGCCGTAAGACTAGAAGGGGCACTAAATCGGAACCCTAAAGGCCGGAACCGGCTTAGAGCTTGACGGGGAAAGCCGGCGAACGTGGCGAGAAAGGAAGGGAAGAAATTTTTTTTTTTTTTTAGCGATCCTAGGGCGATCA	0.09	0.51	1.09
836	GGGGACCAGGTGCCGTAAGATTTTACTGGGCACTAAATCGGAACCCTAAAGCCGGAACCGGCTTTAGAGCTTGACGGGGAAAGCCGGCGAACGTGGCGAGAAAGGAAGGGAAGAAAGCGCCACCTAGCGGAAGCGATCCTAGGGCGATCA	NaN	0.15	1.31
837	GGGGACCAGGTGCCGTAAGTCCGATATGTGCACTAAATCGGAACCCTAAAGCCGGAACCGGCTTTAGAGCTTGACGGGGAAAGCCGGCGAACGTGGCGAGAAAGGAAGGGAAGAAATTTTTTTTTTTTTTTAGCGATCCTAGGGCGATCA	0.19	0.25	1.1
838	GGGGACCAGGTGCCGTAAGTCCAAAGGGCGCACTAAATCGGAACCCTGCCGGAACCGGCCGATTTAGAGCTTGACGGGGAAAGCCGGCGAACGTGGCGAGAAAGGAAGGGAAGAAAGCGCCACCTAGCGGAAGCGATCCTAGGGCGATCA	0.14	0.15	1.17
839	GGGGACCAGGTGCCGTAAGTTACGGGACAGCACTAAATCGGAACCCTGCCGGAACCGGCCGATTTAGAGCTTGACGGGGAAAGCCGGCGAACGTGGCGAGAAAGGAAGGGAAGAAATTTTTTTTTTTTTTTAGCGATCCTAGGGCGATCA	0.06	0.15	1.12
840	GGGGACCAGGTGCCGTAAGATTCAGTCTGGCACTAAATCGGAACGCCGGAACCGGCCCCCGATTTAGAGCTTGACGGGGAAAGCCGGCGAACGTGGCGAGAAAGGAAGGGAAGAAAGCGCCACCTAGCGGAAGCGATCCTAGGGCGATCA	0.26	0.13	1.14
841	GGGGACCAGGTGCCGTAAGGTATGTCGGGGCACTAAATCGGAACGCCGGAACCGGCCCCCGATTTAGAGCTTGACGGGGAAAGCCGGCGAACGTGGCGAGAAAGGAAGGGAAGAAATTTTTTTTTTTTTTTAGCGATCCTAGGGCGATCA	0.37	0.1	0.86
842	GGGGACCAGGTGCCGTAAGTGCTCAGATAGCACTAAATCGGCCGGAACCGGCGAGCCCCCGATTTAGAGCTTGACGGGGAAAGCCGGCGAACGTGGCGAGAAAGGAAGGGAAGAAAGCGCCACCTAGCGGAAGCGATCCTAGGGCGATCA	0.23	0.27	0.9
843	GGGGACCAGGTGCCGTAAGCACCCTGCTCGCACTAAATCGGCCGGAACCGGCGAGCCCCCGATTTAGAGCTTGACGGGGAAAGCCGGCGAACGTGGCGAGAAAGGAAGGGAAGAAATTTTTTTTTTTTTTTAGCGATCCTAGGGCGATCA	0.16	0.25	1.04
844	GGGGACCAGGTGCCGTAAGTAGTTAGTAGGCACTAAAGCCGGAACCGGCAGGGAGCCCCCGATTTAGAGCTTGACGGGGAAAGCCGGCGAACGTGGCGAGAAAGGAAGGGAAGAAAGCGCCACCTAGCGGAAGCGATCCTAGGGCGATCA	NaN	0.13	1.11
845	GGGGACCAGGTGCCGTAAGGGCGACCGAGGCACTAAAGCCGGAACCGGCAGGGAGCCCCCGATTTAGAGCTTGACGGGGAAAGCCGGCGAACGTGGCGAGAAAGGAAGGGAAGAAATTTTTTTTTTTTTTTAGCGATCCTAGGGCGATCA	0.21	0.08	0.87
846	GGGGACCAGGTGCCGTAAGTAGTTAAGAAGCACGCCGGAACCGGCCTAAAGGGAGCCCCCGATTTAGAGCTTGACGGGGAAAGCCGGCGAACGTGGCGAGAAAGGAAGGGAAGAAAGCGCCACCTAGCGGAAGCGATCCTAGGGCGATCA	0.39	0.1	1.12
847	GGGGACCAGGTGCCGTAAGGCCGTACGACGCACGCCGGAACCGGCCTAAAGGGAGCCCCCGATTTAGAGCTTGACGGGGAAAGCCGGCGAACGTGGCGAGAAAGGAAGGGAAGAAATTTTTTTTTTTTTTTAGCGATCCTAGGGCGATCA	0.07	0.06	0.98
848	GGGGACCAGGTGCCGTAAGGCACCCTAGTGCCGGAACCGGCAACCCTAAAGGGAGCCCCCGATTTAGAGCTTGACGGGGAAAGCCGGCGAACGTGGCGAGAAAGGAAGGGAAGAAAGCGCCACCTAGCGGAAGCGATCCTAGGGCGATCA	NaN	NaN	NaN
849	GGGGACCAGGTGCCGTAAGTCGACTATGTGCCGGAACCGGCAACCCTAAAGGGAGCCCCCGATTTAGAGCTTGACGGGGAAAGCCGGCGAACGTGGCGAGAAAGGAAGGGAAGAAATTTTTTTTTTTTTTTAGCGATCCTAGGGCGATCA	0.18	0.19	0.97
850	GGGGACCAGGTGCCGTAAGATCTAGTTGGAAGCCGGACAGGCAGCGACAGCCCTGACAGACAAGACTCTCCTAGCTGCGTCCTCGTCTTCACCGGTCGCGTTCCTGAAACGCAGACGGAAGACTCTCCTCCGGCGATCCTAGGGCGATCA	0.18	1.46	1.19
851	GGGGACCAGGTGCCGTAAGTGGTCCCATGAAGCCGGACAGGCAGCGACAGCCCTGACAGACAAGACTCTCCTAGCTGCGTCCTCGTCTTCACCGGTCGCGTTCCTGAAACGCCGGAAGACTCTCCTCCGCACGCGATCCTAGGGCGATCA	0.27	2.49	1.3
852	GGGGACCAGGTGCCGTAAGAGGCTCTTCTAAGCCGGACAGGCAGCGACAGCCCTGACAGACAAGACTCTCCTAGCTGCGTCCTCGTCTTCACCGGTCGCGTTCCTCGGAAGACTCTCCTCCGACAGCCGCACGCGATCCTAGGGCGATCA	0.21	8.32	1.29
853	GGGGACCAGGTGCCGTAAGGCCTTGTTAAAAGCCGGACAGGCAGCGACAGCCCTGACAGACAAGACTCTCCTAGCTGCGTCCTCGTCTTCACCGGTCGCGTTCGGAAGACTCTCCTCCGCCTACAGCCGCACGCGATCCTAGGGCGATCA	0.2	3.01	1.3
854	GGGGACCAGGTGCCGTAAGTCGGTATCCGAAGCCGGACAGGCAGCGACAGCCCTGACAGACAAGACTCTCCTAGCTGCGTCCTCGTCTTCACCGGTCGCGGAAGACTCTCCTCCGTGTGCCTACAGCCGCACGCGATCCTAGGGCGATCA	0.2	1.94	1.37
855	GGGGACCAGGTGCCGTAAGACGTGTTCACAAGCCGGACAGGCAGCGACAGCCCTGACAGACAAGACTCTCCTAGCTGCGTCCTCGTCTTCACCGGTCGCGGAAGACTCTCCTCCGTTTTTTTTTTTTTTTTCGCGATCCTAGGGCGATCA	0.25	1.37	1.06
856	GGGGACCAGGTGCCGTAAGAGTGTCAGCAAAGCCGGACAGGCAGCGACAGCCCTGACAGACAAGACTCTCCTAGCTGCGTCCTCGTCTTCACCGGCGGAAGACTCTCCTCCGAGATGTGCCTACAGCCGCACGCGATCCTAGGGCGATCA	0.31	4.35	1.43
857	GGGGACCAGGTGCCGTAAGTGCTGATTCGAAGCCGGACAGGCAGCGACAGCCCTGACAGACAAGACTCTCCTAGCTGCGTCCTCGTCTTCACCGGCGGAAGACTCTCCTCCGAGATTTTTTTTTTTTTTTTCGCGATCCTAGGGCGATCA	0.28	5.66	1.15
858	GGGGACCAGGTGCCGTAAGTAAGTCAGAGAAGCCGGACAGGCAGCGACAGCCCTGACAGACAAGACTCTCCTAGCTGCGTCCTCGTCTTCACGGAAGACTCTCCTCCGACGCAGATGTGCCTACAGCCGCACGCGATCCTAGGGCGATCA	0.29	4.63	1.28
859	GGGGACCAGGTGCCGTAAGAGCTCTTTGAAAGCCGGACAGGCAGCGACAGCCCTGACAGACAAGACTCTCCTAGCTGCGTCCTCGTCTTCACGGAAGACTCTCCTCCGACGCAGATTTTTTTTTTTTTTTTCGCGATCCTAGGGCGATCA	0.32	5.87	1.01
860	GGGGACCAGGTGCCGTAAGCTACACCATGAAGCCGGACAGGCAGCGACAGCCCTGACAGACAAGACTCTCCTAGCTGCGTCCTCGTCTCGGAAGACTCTCCTCCGGAAACGCAGATGTGCCTACAGCCGCACGCGATCCTAGGGCGATCA	0.19	7.1	1.22
861	GGGGACCAGGTGCCGTAAGAGCTCATTTTAAGCCGGACAGGCAGCGACAGCCCTGACAGACAAGACTCTCCTAGCTGCGTCCTCGTCTCGGAAGACTCTCCTCCGGAAACGCAGATTTTTTTTTTTTTTTTCGCGATCCTAGGGCGATCA	0.33	8.5	0.91
862	GGGGACCAGGTGCCGTAAGCTCGCTTCGAAAGCCGGACAGGCAGCGACAGCCCTGACAGACAAGACTCTCCTAGCTGCGTCCTCCGGAAGACTCTCCTCCGTCCTGAAACGCAGATGTGCCTACAGCCGCACGCGATCCTAGGGCGATCA	0.26	2.67	1.24
863	GGGGACCAGGTGCCGTAAGTCCTCGGATTAAGCCGGACAGGCAGCGACAGCCCTGACAGACAAGACTCTCCTAGCTGCGTCCTCCGGAAGACTCTCCTCCGTCCTGAAACGCAGATTTTTTTTTTTTTTTTCGCGATCCTAGGGCGATCA	0.24	3.02	1.05
864	GGGGACCAGGTGCCGTAAGGCCGGTCGAGAAGCCGGACAGGCAGCGACAGCCCTGACAGACAAGACTCTCCTAGCTGCGTCCGGAAGACTCTCCTCCGCGTTCCTGAAACGCAGATGTGCCTACAGCCGCACGCGATCCTAGGGCGATCA	0.17	4.16	1.26
865	GGGGACCAGGTGCCGTAAGAGGCTATGTAAAGCCGGACAGGCAGCGACAGCCCTGACAGACAAGACTCTCCTAGCTGCGTCCGGAAGACTCTCCTCCGCGTTCCTGAAACGCAGATTTTTTTTTTTTTTTTCGCGATCCTAGGGCGATCA	0.18	4.69	0.94
866	GGGGACCAGGTGCCGTAAGGCTACTTAAAAAGCCGGACAGGCAGCGACAGCCCTGACAGACAAGACTCTCCTAGCTGCGGAAGACTCTCCTCCGGTCGCGTTCCTGAAACGCAGATGTGCCTACAGCCGCACGCGATCCTAGGGCGATCA	0.18	2.89	1.19
867	GGGGACCAGGTGCCGTAAGGATTGTCGGTAAGCCGGACAGGCAGCGACAGCCCTGACAGACAAGACTCTCCTAGCTGCGGAAGACTCTCCTCCGGTCGCGTTCCTGAAACGCAGATTTTTTTTTTTTTTTTCGCGATCCTAGGGCGATCA	0.18	3.06	1.06
868	GGGGACCAGGTGCCGTAAGTGTGCAAACGAAGCCGGACAGGCAGCGACAGCCCTGACAGACAAGACTCTCCTAGCGGAAGACTCTCCTCCGCCGGTCGCGTTCCTGAAACGCAGATGTGCCTACAGCCGCACGCGATCCTAGGGCGATCA	0.25	0.87	1.11
869	GGGGACCAGGTGCCGTAAGCGACCGCACCAAGCCGGACAGGCAGCGACAGCCCTGACAGACAAGACTCTCCTAGCGGAAGACTCTCCTCCGCCGGTCGCGTTCCTGAAACGCAGATTTTTTTTTTTTTTTTCGCGATCCTAGGGCGATCA	0.19	1.18	0.99
870	GGGGACCAGGTGCCGTAAGTGAGAGGTCAAAGCCGGACAGGCAGCGACAGCCCTGACAGACAAGACTCTCCGGAAGACTCTCCTCCGTTCACCGGTCGCGTTCCTGAAACGCAGATGTGCCTACAGCCGCACGCGATCCTAGGGCGATCA	0.3	3.77	1.32
871	GGGGACCAGGTGCCGTAAGAGAACCTGTGAAGCCGGACAGGCAGCGACAGCCCTGACAGACAAGACTCTCCGGAAGACTCTCCTCCGTTCACCGGTCGCGTTCCTGAAACGCAGATTTTTTTTTTTTTTTTCGCGATCCTAGGGCGATCA	0.22	3.84	1.03
872	GGGGACCAGGTGCCGTAAGACTAGGACGCAAGCCGGACAGGCAGCGACAGCCCTGACAGACAAGACTCGGAAGACTCTCCTCCGGTCTTCACCGGTCGCGTTCCTGAAACGCAGATGTGCCTACAGCCGCACGCGATCCTAGGGCGATCA	0.2	6.76	1.16
873	GGGGACCAGGTGCCGTAAGTTTAACTGTGAAGCCGGACAGGCAGCGACAGCCCTGACAGACAAGACTCGGAAGACTCTCCTCCGGTCTTCACCGGTCGCGTTCCTGAAACGCAGATTTTTTTTTTTTTTTTCGCGATCCTAGGGCGATCA	0.22	7.93	1.14
874	GGGGACCAGGTGCCGTAAGCTCACCATGTAAGCCGGACAGGCAGCGACAGCCCTGACAGACAACGGAAGACTCTCCTCCGCCTCGTCTTCACCGGTCGCGTTCCTGAAACGCAGATGTGCCTACAGCCGCACGCGATCCTAGGGCGATCA	0.24	1.24	1.31
875	GGGGACCAGGTGCCGTAAGCTTAACACATAAGCCGGACAGGCAGCGACAGCCCTGACAGACAACGGAAGACTCTCCTCCGCCTCGTCTTCACCGGTCGCGTTCCTGAAACGCAGATTTTTTTTTTTTTTTTCGCGATCCTAGGGCGATCA	0.19	1.43	1.14
876	GGGGACCAGGTGCCGTAAGCTATCCTATGAAGCCGGACAGGCAGCGACAGCCCTGACAGACGGAAGACTCTCCTCCGCGTCCTCGTCTTCACCGGTCGCGTTCCTGAAACGCAGATGTGCCTACAGCCGCACGCGATCCTAGGGCGATCA	0.19	1.52	1.28
877	GGGGACCAGGTGCCGTAAGACCCAGTATGAAGCCGGACAGGCAGCGACAGCCCTGACAGACGGAAGACTCTCCTCCGCGTCCTCGTCTTCACCGGTCGCGTTCCTGAAACGCAGATTTTTTTTTTTTTTTTCGCGATCCTAGGGCGATCA	0.17	1.57	0.98
878	GGGGACCAGGTGCCGTAAGTGAGGCATTTAAGCCGGACAGGCAGCGACAGCCCTGACGGAAGACTCTCCTCCGGCTGCGTCCTCGTCTTCACCGGTCGCGTTCCTGAAACGCAGATGTGCCTACAGCCGCACGCGATCCTAGGGCGATCA	0.27	2.2	1.28
879	GGGGACCAGGTGCCGTAAGATTAACCCAAAAGCCGGACAGGCAGCGACAGCCCTGACGGAAGACTCTCCTCCGGCTGCGTCCTCGTCTTCACCGGTCGCGTTCCTGAAACGCAGATTTTTTTTTTTTTTTTCGCGATCCTAGGGCGATCA	0.17	2.49	1.08
880	GGGGACCAGGTGCCGTAAGGGCAGCTTGTAAGCCGGACAGGCAGCGACAGCCCCGGAAGACTCTCCTCCGCTAGCTGCGTCCTCGTCTTCACCGGTCGCGTTCCTGAAACGCAGATGTGCCTACAGCCGCACGCGATCCTAGGGCGATCA	0.19	2.69	1.22
881	GGGGACCAGGTGCCGTAAGTGTTAATGCCAAGCCGGACAGGCAGCGACAGCCCCGGAAGACTCTCCTCCGCTAGCTGCGTCCTCGTCTTCACCGGTCGCGTTCCTGAAACGCAGATTTTTTTTTTTTTTTTCGCGATCCTAGGGCGATCA	0.19	2.83	1.14
882	GGGGACCAGGTGCCGTAAGCAAGTATTCTAAGCCGGACAGGCAGCGACAGCCGGAAGACTCTCCTCCGTCCTAGCTGCGTCCTCGTCTTCACCGGTCGCGTTCCTGAAACGCAGATGTGCCTACAGCCGCACGCGATCCTAGGGCGATCA	0.16	2.28	1.25
883	GGGGACCAGGTGCCGTAAGAACTTTAGGGAAGCCGGACAGGCAGCGACAGCCGGAAGACTCTCCTCCGTCCTAGCTGCGTCCTCGTCTTCACCGGTCGCGTTCCTGAAACGCAGATTTTTTTTTTTTTTTTCGCGATCCTAGGGCGATCA	0.2	2.65	1.13
884	GGGGACCAGGTGCCGTAAGACATGGAGACAAGCCGGACAGGCAGCGACACGGAAGACTCTCCTCCGTCTCCTAGCTGCGTCCTCGTCTTCACCGGTCGCGTTCCTGAAACGCAGATGTGCCTACAGCCGCACGCGATCCTAGGGCGATCA	0.28	1.29	1.25
885	GGGGACCAGGTGCCGTAAGCCTGTCACAGAAGCCGGACAGGCAGCGACACGGAAGACTCTCCTCCGTCTCCTAGCTGCGTCCTCGTCTTCACCGGTCGCGTTCCTGAAACGCAGATTTTTTTTTTTTTTTTCGCGATCCTAGGGCGATCA	0.18	1.47	1.09
886	GGGGACCAGGTGCCGTAAGACGCAACCTTAAGCCGGACAGGCAGCGCGGAAGACTCTCCTCCGGACTCTCCTAGCTGCGTCCTCGTCTTCACCGGTCGCGTTCCTGAAACGCAGATGTGCCTACAGCCGCACGCGATCCTAGGGCGATCA	0.31	3.82	1.29
887	GGGGACCAGGTGCCGTAAGGCCTTCGATTAAGCCGGACAGGCAGCGCGGAAGACTCTCCTCCGGACTCTCCTAGCTGCGTCCTCGTCTTCACCGGTCGCGTTCCTGAAACGCAGATTTTTTTTTTTTTTTTCGCGATCCTAGGGCGATCA	0.24	4.72	1.04
888	GGGGACCAGGTGCCGTAAGCCAGGCTTCTAAGCCGGACAGGCAGCCGGAAGACTCTCCTCCGAGACTCTCCTAGCTGCGTCCTCGTCTTCACCGGTCGCGTTCCTGAAACGCAGATGTGCCTACAGCCGCACGCGATCCTAGGGCGATCA	0.19	9.11	1.36
889	GGGGACCAGGTGCCGTAAGCCCTGTGCCCAAGCCGGACAGGCAGCCGGAAGACTCTCCTCCGAGACTCTCCTAGCTGCGTCCTCGTCTTCACCGGTCGCGTTCCTGAAACGCAGATTTTTTTTTTTTTTTTCGCGATCCTAGGGCGATCA	0.31	9.26	1.04
890	GGGGACCAGGTGCCGTAAGCGAAATTTCTAAGCCGGACAGGCCGGAAGACTCTCCTCCGACAAGACTCTCCTAGCTGCGTCCTCGTCTTCACCGGTCGCGTTCCTGAAACGCAGATGTGCCTACAGCCGCACGCGATCCTAGGGCGATCA	0.16	7.51	1.22
891	GGGGACCAGGTGCCGTAAGTCCACGACTGAAGCCGGACAGGCCGGAAGACTCTCCTCCGACAAGACTCTCCTAGCTGCGTCCTCGTCTTCACCGGTCGCGTTCCTGAAACGCAGATTTTTTTTTTTTTTTTCGCGATCCTAGGGCGATCA	0.15	6.76	1.05
892	GGGGACCAGGTGCCGTAAGATTGATTGTGAAGCCGGACACGGAAGACTCTCCTCCGCAGACAAGACTCTCCTAGCTGCGTCCTCGTCTTCACCGGTCGCGTTCCTGAAACGCAGATGTGCCTACAGCCGCACGCGATCCTAGGGCGATCA	0.17	1.81	1.28
893	GGGGACCAGGTGCCGTAAGCTTCAGCGAGAAGCCGGACACGGAAGACTCTCCTCCGCAGACAAGACTCTCCTAGCTGCGTCCTCGTCTTCACCGGTCGCGTTCCTGAAACGCAGATTTTTTTTTTTTTTTTCGCGATCCTAGGGCGATCA	0.15	1.92	1.04
894	GGGGACCAGGTGCCGTAAGGATACGGCTAAAGCCGCGGAAGACTCTCCTCCGCTGACAGACAAGACTCTCCTAGCTGCGTCCTCGTCTTCACCGGTCGCGTTCCTGAAACGCAGATGTGCCTACAGCCGCACGCGATCCTAGGGCGATCA	0.22	1.49	1.29
895	GGGGACCAGGTGCCGTAAGGTAGCCCATGAAGCCGCGGAAGACTCTCCTCCGCTGACAGACAAGACTCTCCTAGCTGCGTCCTCGTCTTCACCGGTCGCGTTCCTGAAACGCAGATTTTTTTTTTTTTTTTCGCGATCCTAGGGCGATCA	0.12	1.73	1
896	GGGGACCAGGTGCCGTAAGGTTGCGAGGGAAGCGGAAGACTCTCCTCCGGCCCTGACAGACAAGACTCTCCTAGCTGCGTCCTCGTCTTCACCGGTCGCGTTCCTGAAACGCAGATGTGCCTACAGCCGCACGCGATCCTAGGGCGATCA	0.15	2.59	1.46
897	GGGGACCAGGTGCCGTAAGACTGAACTATAAGCGGAAGACTCTCCTCCGGCCCTGACAGACAAGACTCTCCTAGCTGCGTCCTCGTCTTCACCGGTCGCGTTCCTGAAACGCAGATTTTTTTTTTTTTTTTCGCGATCCTAGGGCGATCA	0.16	3.01	1.08
898	GGGGACCAGGTGCCGTAAGGCACGAGCCAAAGCCGGACAGGCAGCGACAGCCCTGACAGACAAGACTCTCCTAGCTGCGTCCTCGTCTTCACCGGTCGCGTTCCTGAAACGCAGATGTGCCTAATGACTCATGCGATCCTAGGGCGATCA	0.99	0.08	1.32
899	GGGGACCAGGTGCCGTAAGGTAGGTCTTTAAGCCGGACAGGCAGCGACAGCCCTGACAGACAAGACTCTCCTAGCTGCGTCCTCGTCTTCACCGGTCGCGTTCCTGAAACGCAGATGTGCATGACTCATCACGCGATCCTAGGGCGATCA	2.78	0.07	1.23
900	GGGGACCAGGTGCCGTAAGATTAACGCCCAAGCCGGACAGGCAGCGACAGCCCTGACAGACAAGACTCTCCTAGCTGCGTCCTCGTCTTCACCGGTCGCGTTCCTGAAACGCAATGACTCATACAGCCGCACGCGATCCTAGGGCGATCA	2.68	0.05	1.3
901	GGGGACCAGGTGCCGTAAGTGGCGCTACGAAGCCGGACAGGCAGCGACAGCCCTGACAGACAAGACTCTCCTAGCTGCGTCCTCGTCTTCACCGGTCGCGTTCCTGAAACATGACTCATCCTACAGCCGCACGCGATCCTAGGGCGATCA	3.32	0.05	1.32
902	GGGGACCAGGTGCCGTAAGAAACGTACTCAAGCCGGACAGGCAGCGACAGCCCTGACAGACAAGACTCTCCTAGCTGCGTCCTCGTCTTCACCGGTCGCGTTCCTGATGACTCATTGTGCCTACAGCCGCACGCGATCCTAGGGCGATCA	2.09	0.07	1.3
903	GGGGACCAGGTGCCGTAAGCCCAGACGACAAGCCGGACAGGCAGCGACAGCCCTGACAGACAAGACTCTCCTAGCTGCGTCCTCGTCTTCACCGGTCGCGTTCCTGATGACTCATTTTTTTTTTTTTTTTTCGCGATCCTAGGGCGATCA	2.51	0.1	1.04
904	GGGGACCAGGTGCCGTAAGCCACACATTAAAGCCGGACAGGCAGCGACAGCCCTGACAGACAAGACTCTCCTAGCTGCGTCCTCGTCTTCACCGGTCGCGTTCATGACTCATAGATGTGCCTACAGCCGCACGCGATCCTAGGGCGATCA	1.54	0.09	1.33
905	GGGGACCAGGTGCCGTAAGAATGACGCTCAAGCCGGACAGGCAGCGACAGCCCTGACAGACAAGACTCTCCTAGCTGCGTCCTCGTCTTCACCGGTCGCGTTCATGACTCATAGATTTTTTTTTTTTTTTTCGCGATCCTAGGGCGATCA	1.32	0.11	1.12
906	GGGGACCAGGTGCCGTAAGTGTTGACAGAAAGCCGGACAGGCAGCGACAGCCCTGACAGACAAGACTCTCCTAGCTGCGTCCTCGTCTTCACCGGTCGCATGACTCATACGCAGATGTGCCTACAGCCGCACGCGATCCTAGGGCGATCA	2.45	0.05	1.29
907	GGGGACCAGGTGCCGTAAGCGAATACCGCAAGCCGGACAGGCAGCGACAGCCCTGACAGACAAGACTCTCCTAGCTGCGTCCTCGTCTTCACCGGTCGCATGACTCATACGCAGATTTTTTTTTTTTTTTTCGCGATCCTAGGGCGATCA	1.81	0.07	1.17
908	GGGGACCAGGTGCCGTAAGACTACCTCGGAAGCCGGACAGGCAGCGACAGCCCTGACAGACAAGACTCTCCTAGCTGCGTCCTCGTCTTCACCGGTATGACTCATGAAACGCAGATGTGCCTACAGCCGCACGCGATCCTAGGGCGATCA	1.91	0.07	1.21
909	GGGGACCAGGTGCCGTAAGCAGCGCTAGAAAGCCGGACAGGCAGCGACAGCCCTGACAGACAAGACTCTCCTAGCTGCGTCCTCGTCTTCACCGGTATGACTCATGAAACGCAGATTTTTTTTTTTTTTTTCGCGATCCTAGGGCGATCA	1.64	0.11	1.1
910	GGGGACCAGGTGCCGTAAGACTCGACATGAAGCCGGACAGGCAGCGACAGCCCTGACAGACAAGACTCTCCTAGCTGCGTCCTCGTCTTCACATGACTCATTCCTGAAACGCAGATGTGCCTACAGCCGCACGCGATCCTAGGGCGATCA	1.07	0.05	1.27
911	GGGGACCAGGTGCCGTAAGCGTCTAACAGAAGCCGGACAGGCAGCGACAGCCCTGACAGACAAGACTCTCCTAGCTGCGTCCTCGTCTTCACATGACTCATTCCTGAAACGCAGATTTTTTTTTTTTTTTTCGCGATCCTAGGGCGATCA	0.99	0.12	1.02
912	GGGGACCAGGTGCCGTAAGTGAATGTCGCAAGCCGGACAGGCAGCGACAGCCCTGACAGACAAGACTCTCCTAGCTGCGTCCTCGTCTTATGACTCATCGTTCCTGAAACGCAGATGTGCCTACAGCCGCACGCGATCCTAGGGCGATCA	3.86	0.05	1.25
913	GGGGACCAGGTGCCGTAAGCGCCGGCACTAAGCCGGACAGGCAGCGACAGCCCTGACAGACAAGACTCTCCTAGCTGCGTCCTCGTCTTATGACTCATCGTTCCTGAAACGCAGATTTTTTTTTTTTTTTTCGCGATCCTAGGGCGATCA	3.25	0.17	1.01
914	GGGGACCAGGTGCCGTAAGGTGGCTCCCGAAGCCGGACAGGCAGCGACAGCCCTGACAGACAAGACTCTCCTAGCTGCGTCCTCGATGACTCATGTCGCGTTCCTGAAACGCAGATGTGCCTACAGCCGCACGCGATCCTAGGGCGATCA	1.68	0.07	1.26
915	GGGGACCAGGTGCCGTAAGCAAACTTTTCAAGCCGGACAGGCAGCGACAGCCCTGACAGACAAGACTCTCCTAGCTGCGTCCTCGATGACTCATGTCGCGTTCCTGAAACGCAGATTTTTTTTTTTTTTTTCGCGATCCTAGGGCGATCA	1.35	0.09	1.05
916	GGGGACCAGGTGCCGTAAGACTCTCGTGTAAGCCGGACAGGCAGCGACAGCCCTGACAGACAAGACTCTCCTAGCTGCGTCCATGACTCATCCGGTCGCGTTCCTGAAACGCAGATGTGCCTACAGCCGCACGCGATCCTAGGGCGATCA	1.6	0.05	1.18
917	GGGGACCAGGTGCCGTAAGTCCTCAATGAAAGCCGGACAGGCAGCGACAGCCCTGACAGACAAGACTCTCCTAGCTGCGTCCATGACTCATCCGGTCGCGTTCCTGAAACGCAGATTTTTTTTTTTTTTTTCGCGATCCTAGGGCGATCA	1.37	0.12	0.96
918	GGGGACCAGGTGCCGTAAGGCCGCGGCTTAAGCCGGACAGGCAGCGACAGCCCTGACAGACAAGACTCTCCTAGCTGCATGACTCATTTCACCGGTCGCGTTCCTGAAACGCAGATGTGCCTACAGCCGCACGCGATCCTAGGGCGATCA	1.8	0.13	1.24
919	GGGGACCAGGTGCCGTAAGCCACCAGCGAAAGCCGGACAGGCAGCGACAGCCCTGACAGACAAGACTCTCCTAGCTGCATGACTCATTTCACCGGTCGCGTTCCTGAAACGCAGATTTTTTTTTTTTTTTTCGCGATCCTAGGGCGATCA	1.31	0.09	0.96
920	GGGGACCAGGTGCCGTAAGGGGCTACGTCAAGCCGGACAGGCAGCGACAGCCCTGACAGACAAGACTCTCCTAGCATGACTCATGTCTTCACCGGTCGCGTTCCTGAAACGCAGATGTGCCTACAGCCGCACGCGATCCTAGGGCGATCA	1.13	0.05	1.18
921	GGGGACCAGGTGCCGTAAGATACTGAGGAAAGCCGGACAGGCAGCGACAGCCCTGACAGACAAGACTCTCCTAGCATGACTCATGTCTTCACCGGTCGCGTTCCTGAAACGCAGATTTTTTTTTTTTTTTTCGCGATCCTAGGGCGATCA	0.96	0.11	1
922	GGGGACCAGGTGCCGTAAGTCGCTTTGCGAAGCCGGACAGGCAGCGACAGCCCTGACAGACAAGACTCTCCATGACTCATCCTCGTCTTCACCGGTCGCGTTCCTGAAACGCAGATGTGCCTACAGCCGCACGCGATCCTAGGGCGATCA	1.59	0.06	1.21
923	GGGGACCAGGTGCCGTAAGTGTTCGTCACAAGCCGGACAGGCAGCGACAGCCCTGACAGACAAGACTCTCCATGACTCATCCTCGTCTTCACCGGTCGCGTTCCTGAAACGCAGATTTTTTTTTTTTTTTTCGCGATCCTAGGGCGATCA	1.4	0.09	0.99
924	GGGGACCAGGTGCCGTAAGGCGAAGCGTGAAGCCGGACAGGCAGCGACAGCCCTGACAGACAAGACTCATGACTCATCGTCCTCGTCTTCACCGGTCGCGTTCCTGAAACGCAGATGTGCCTACAGCCGCACGCGATCCTAGGGCGATCA	1.91	0.06	1.26
925	GGGGACCAGGTGCCGTAAGTTAATGGTTAAAGCCGGACAGGCAGCGACAGCCCTGACAGACAAGACTCATGACTCATCGTCCTCGTCTTCACCGGTCGCGTTCCTGAAACGCAGATTTTTTTTTTTTTTTTCGCGATCCTAGGGCGATCA	1.52	0.1	1.07
926	GGGGACCAGGTGCCGTAAGGCGGGTATCCAAGCCGGACAGGCAGCGACAGCCCTGACAGACAAGATGACTCATGCTGCGTCCTCGTCTTCACCGGTCGCGTTCCTGAAACGCAGATGTGCCTACAGCCGCACGCGATCCTAGGGCGATCA	2.15	0.05	1.26
927	GGGGACCAGGTGCCGTAAGCAAGAGTGGTAAGCCGGACAGGCAGCGACAGCCCTGACAGACAAGATGACTCATGCTGCGTCCTCGTCTTCACCGGTCGCGTTCCTGAAACGCAGATTTTTTTTTTTTTTTTCGCGATCCTAGGGCGATCA	1.64	0.09	1.09
928	GGGGACCAGGTGCCGTAAGAAACTAGTCTAAGCCGGACAGGCAGCGACAGCCCTGACAGACATGACTCATCTAGCTGCGTCCTCGTCTTCACCGGTCGCGTTCCTGAAACGCAGATGTGCCTACAGCCGCACGCGATCCTAGGGCGATCA	1.51	0.08	1.25
929	GGGGACCAGGTGCCGTAAGCTATGCACTAAAGCCGGACAGGCAGCGACAGCCCTGACAGACATGACTCATCTAGCTGCGTCCTCGTCTTCACCGGTCGCGTTCCTGAAACGCAGATTTTTTTTTTTTTTTTCGCGATCCTAGGGCGATCA	1.39	0.08	1.05
930	GGGGACCAGGTGCCGTAAGTCTCTGTAGAAAGCCGGACAGGCAGCGACAGCCCTGACAGATGACTCATTCCTAGCTGCGTCCTCGTCTTCACCGGTCGCGTTCCTGAAACGCAGATGTGCCTACAGCCGCACGCGATCCTAGGGCGATCA	2.55	0.05	1.2
931	GGGGACCAGGTGCCGTAAGGTTTCTCTGGAAGCCGGACAGGCAGCGACAGCCCTGACAGATGACTCATTCCTAGCTGCGTCCTCGTCTTCACCGGTCGCGTTCCTGAAACGCAGATTTTTTTTTTTTTTTTCGCGATCCTAGGGCGATCA	2.12	0.07	1.09
932	GGGGACCAGGTGCCGTAAGCTTCGTAAGGAAGCCGGACAGGCAGCGACAGCCCTGACATGACTCATTCTCCTAGCTGCGTCCTCGTCTTCACCGGTCGCGTTCCTGAAACGCAGATGTGCCTACAGCCGCACGCGATCCTAGGGCGATCA	1.46	0.06	1.21
933	GGGGACCAGGTGCCGTAAGGGGAGCTATGAAGCCGGACAGGCAGCGACAGCCCTGACATGACTCATTCTCCTAGCTGCGTCCTCGTCTTCACCGGTCGCGTTCCTGAAACGCAGATTTTTTTTTTTTTTTTCGCGATCCTAGGGCGATCA	1.15	0.06	1.07
934	GGGGACCAGGTGCCGTAAGGCTAAGACGAAAGCCGGACAGGCAGCGACAGCCCTATGACTCATGACTCTCCTAGCTGCGTCCTCGTCTTCACCGGTCGCGTTCCTGAAACGCAGATGTGCCTACAGCCGCACGCGATCCTAGGGCGATCA	1.89	0.07	1.28
935	GGGGACCAGGTGCCGTAAGCGATCTTCTGAAGCCGGACAGGCAGCGACAGCCCTATGACTCATGACTCTCCTAGCTGCGTCCTCGTCTTCACCGGTCGCGTTCCTGAAACGCAGATTTTTTTTTTTTTTTTCGCGATCCTAGGGCGATCA	1.65	0.07	1
936	GGGGACCAGGTGCCGTAAGCATTTACTTCAAGCCGGACAGGCAGCGACAGCCCATGACTCATAGACTCTCCTAGCTGCGTCCTCGTCTTCACCGGTCGCGTTCCTGAAACGCAGATGTGCCTACAGCCGCACGCGATCCTAGGGCGATCA	1.39	0.08	1.3
937	GGGGACCAGGTGCCGTAAGCGCTTGTGAGAAGCCGGACAGGCAGCGACAGCCCATGACTCATAGACTCTCCTAGCTGCGTCCTCGTCTTCACCGGTCGCGTTCCTGAAACGCAGATTTTTTTTTTTTTTTTCGCGATCCTAGGGCGATCA	1.25	0.08	1
938	GGGGACCAGGTGCCGTAAGGATCATTTAAAAGCCGGACAGGCAGCGACAGATGACTCATACAAGACTCTCCTAGCTGCGTCCTCGTCTTCACCGGTCGCGTTCCTGAAACGCAGATGTGCCTACAGCCGCACGCGATCCTAGGGCGATCA	3	0.08	1.43
939	GGGGACCAGGTGCCGTAAGAACGTCAGACAAGCCGGACAGGCAGCGACAGATGACTCATACAAGACTCTCCTAGCTGCGTCCTCGTCTTCACCGGTCGCGTTCCTGAAACGCAGATTTTTTTTTTTTTTTTCGCGATCCTAGGGCGATCA	2.69	0.09	0.96
940	GGGGACCAGGTGCCGTAAGCGGTCATAGGAAGCCGGACAGGCAGCGAATGACTCATCAGACAAGACTCTCCTAGCTGCGTCCTCGTCTTCACCGGTCGCGTTCCTGAAACGCAGATGTGCCTACAGCCGCACGCGATCCTAGGGCGATCA	2.44	0.04	1.22
941	GGGGACCAGGTGCCGTAAGTCGTGATTGCAAGCCGGACAGGCAGCGAATGACTCATCAGACAAGACTCTCCTAGCTGCGTCCTCGTCTTCACCGGTCGCGTTCCTGAAACGCAGATTTTTTTTTTTTTTTTCGCGATCCTAGGGCGATCA	1.75	0.07	0.99
942	GGGGACCAGGTGCCGTAAGCTCGGTCTATAAGCCGGACAGGCAATGACTCATCTGACAGACAAGACTCTCCTAGCTGCGTCCTCGTCTTCACCGGTCGCGTTCCTGAAACGCAGATGTGCCTACAGCCGCACGCGATCCTAGGGCGATCA	1.61	0.06	1.3
943	GGGGACCAGGTGCCGTAAGGCCGAAACCAAAGCCGGACAGGCAATGACTCATCTGACAGACAAGACTCTCCTAGCTGCGTCCTCGTCTTCACCGGTCGCGTTCCTGAAACGCAGATTTTTTTTTTTTTTTTCGCGATCCTAGGGCGATCA	1.43	0.08	0.88
944	GGGGACCAGGTGCCGTAAGAAGACAGTAAAAGCCGGACAGATGACTCATGCCCTGACAGACAAGACTCTCCTAGCTGCGTCCTCGTCTTCACCGGTCGCGTTCCTGAAACGCAGATGTGCCTACAGCCGCACGCGATCCTAGGGCGATCA	1.67	0.11	1.29
945	GGGGACCAGGTGCCGTAAGATCAGTCGGTAAGCCGGACAGATGACTCATGCCCTGACAGACAAGACTCTCCTAGCTGCGTCCTCGTCTTCACCGGTCGCGTTCCTGAAACGCAGATTTTTTTTTTTTTTTTCGCGATCCTAGGGCGATCA	1.43	0.07	1.05
946	GGGGACCAGGTGCCGTAAGTGCAGCCAAAAAGCCGGATGACTCATGACAGCCCTGACAGACAAGACTCTCCTAGCTGCGTCCTCGTCTTCACCGGTCGCGTTCCTGAAACGCAGATGTGCCTACAGCCGCACGCGATCCTAGGGCGATCA	1.32	0.07	1.22
947	GGGGACCAGGTGCCGTAAGTGTATGGTTCAAGCCGGATGACTCATGACAGCCCTGACAGACAAGACTCTCCTAGCTGCGTCCTCGTCTTCACCGGTCGCGTTCCTGAAACGCAGATTTTTTTTTTTTTTTTCGCGATCCTAGGGCGATCA	1.1	0.1	0.94
948	GGGGACCAGGTGCCGTAAGAAACCGTTCAAAGATGACTCATCAGCGACAGCCCTGACAGACAAGACTCTCCTAGCTGCGTCCTCGTCTTCACCGGTCGCGTTCCTGAAACGCAGATGTGCCTACAGCCGCACGCGATCCTAGGGCGATCA	4.43	0.05	1.3
949	GGGGACCAGGTGCCGTAAGCGAACGAGCCAAGATGACTCATCAGCGACAGCCCTGACAGACAAGACTCTCCTAGCTGCGTCCTCGTCTTCACCGGTCGCGTTCCTGAAACGCAGATTTTTTTTTTTTTTTTCGCGATCCTAGGGCGATCA	2.83	0.07	1.07
950	GGGGACCAGGTGCCGTAAGACGTACAATCAAGCCGGACAGGCAGCGACAGCCCTGACAGACAAGACTCTCCTAGCTGCGTCCTCGTCTTCACCGGTCGCGTTCCTGAAACGCAGATGTGCGCCGGAACCGGCGCGATCCTAGGGCGATCA	NaN	NaN	1.29
951	GGGGACCAGGTGCCGTAAGGCTCGGATTGAAGCCGGACAGGCAGCGACAGCCCTGACAGACAAGACTCTCCTAGCTGCGTCCTCGTCTTCACCGGTCGCGTTCCTGAAACGCAGATGGCCGGAACCGGCCACGCGATCCTAGGGCGATCA	0.32	0.07	1.15
952	GGGGACCAGGTGCCGTAAGATCTAGTCCAAAGCCGGACAGGCAGCGACAGCCCTGACAGACAAGACTCTCCTAGCTGCGTCCTCGTCTTCACCGGTCGCGTTCCTGAAACGCCGGAACCGGCACAGCCGCACGCGATCCTAGGGCGATCA	0.17	0.08	1.34
953	GGGGACCAGGTGCCGTAAGGCTGCAGTAGAAGCCGGACAGGCAGCGACAGCCCTGACAGACAAGACTCTCCTAGCTGCGTCCTCGTCTTCACCGGTCGCGTTCCTGAGCCGGAACCGGCCCTACAGCCGCACGCGATCCTAGGGCGATCA	0.25	0.06	1.15
954	GGGGACCAGGTGCCGTAAGCAACAAGGTGAAGCCGGACAGGCAGCGACAGCCCTGACAGACAAGACTCTCCTAGCTGCGTCCTCGTCTTCACCGGTCGCGTTCGCCGGAACCGGCTGTGCCTACAGCCGCACGCGATCCTAGGGCGATCA	0.14	0.07	1.15
955	GGGGACCAGGTGCCGTAAGCGGCACTGGAAAGCCGGACAGGCAGCGACAGCCCTGACAGACAAGACTCTCCTAGCTGCGTCCTCGTCTTCACCGGTCGCGTTCGCCGGAACCGGCTTTTTTTTTTTTTTTTCGCGATCCTAGGGCGATCA	0.24	0.1	0.96
956	GGGGACCAGGTGCCGTAAGTGTCAGCCGAAAGCCGGACAGGCAGCGACAGCCCTGACAGACAAGACTCTCCTAGCTGCGTCCTCGTCTTCACCGGTCGCGGCCGGAACCGGCAGATGTGCCTACAGCCGCACGCGATCCTAGGGCGATCA	0.18	0.05	1.22
957	GGGGACCAGGTGCCGTAAGGGCTGTCAGGAAGCCGGACAGGCAGCGACAGCCCTGACAGACAAGACTCTCCTAGCTGCGTCCTCGTCTTCACCGGTCGCGGCCGGAACCGGCAGATTTTTTTTTTTTTTTTCGCGATCCTAGGGCGATCA	0.22	0.08	0.99
958	GGGGACCAGGTGCCGTAAGAATAGTTGGCAAGCCGGACAGGCAGCGACAGCCCTGACAGACAAGACTCTCCTAGCTGCGTCCTCGTCTTCACCGGTGCCGGAACCGGCACGCAGATGTGCCTACAGCCGCACGCGATCCTAGGGCGATCA	0.22	0.04	1.26
959	GGGGACCAGGTGCCGTAAGGATACAATCTAAGCCGGACAGGCAGCGACAGCCCTGACAGACAAGACTCTCCTAGCTGCGTCCTCGTCTTCACCGGTGCCGGAACCGGCACGCAGATTTTTTTTTTTTTTTTCGCGATCCTAGGGCGATCA	0.18	0.07	1.28
960	GGGGACCAGGTGCCGTAAGGCAATGTGTGAAGCCGGACAGGCAGCGACAGCCCTGACAGACAAGACTCTCCTAGCTGCGTCCTCGTCTTCACCGCCGGAACCGGCGAAACGCAGATGTGCCTACAGCCGCACGCGATCCTAGGGCGATCA	0.33	0.05	1.18
961	GGGGACCAGGTGCCGTAAGGTAGAGCAGCAAGCCGGACAGGCAGCGACAGCCCTGACAGACAAGACTCTCCTAGCTGCGTCCTCGTCTTCACCGCCGGAACCGGCGAAACGCAGATTTTTTTTTTTTTTTTCGCGATCCTAGGGCGATCA	0.25	0.08	1.02
962	GGGGACCAGGTGCCGTAAGACTTCGAGCAAAGCCGGACAGGCAGCGACAGCCCTGACAGACAAGACTCTCCTAGCTGCGTCCTCGTCTTGCCGGAACCGGCTCCTGAAACGCAGATGTGCCTACAGCCGCACGCGATCCTAGGGCGATCA	0.28	0.05	1.2
963	GGGGACCAGGTGCCGTAAGCGTCACTAAAAAGCCGGACAGGCAGCGACAGCCCTGACAGACAAGACTCTCCTAGCTGCGTCCTCGTCTTGCCGGAACCGGCTCCTGAAACGCAGATTTTTTTTTTTTTTTTCGCGATCCTAGGGCGATCA	0.23	0.11	0.87
964	GGGGACCAGGTGCCGTAAGACCGACATAGAAGCCGGACAGGCAGCGACAGCCCTGACAGACAAGACTCTCCTAGCTGCGTCCTCGTGCCGGAACCGGCCGTTCCTGAAACGCAGATGTGCCTACAGCCGCACGCGATCCTAGGGCGATCA	0.29	0.07	1.23
965	GGGGACCAGGTGCCGTAAGTCTCGTGACAAAGCCGGACAGGCAGCGACAGCCCTGACAGACAAGACTCTCCTAGCTGCGTCCTCGTGCCGGAACCGGCCGTTCCTGAAACGCAGATTTTTTTTTTTTTTTTCGCGATCCTAGGGCGATCA	0.27	0.07	1.06
966	GGGGACCAGGTGCCGTAAGACATTGTATTAAGCCGGACAGGCAGCGACAGCCCTGACAGACAAGACTCTCCTAGCTGCGTCCGCCGGAACCGGCGTCGCGTTCCTGAAACGCAGATGTGCCTACAGCCGCACGCGATCCTAGGGCGATCA	0.24	0.09	1.37
967	GGGGACCAGGTGCCGTAAGCCAGTGTTGAAAGCCGGACAGGCAGCGACAGCCCTGACAGACAAGACTCTCCTAGCTGCGTCCGCCGGAACCGGCGTCGCGTTCCTGAAACGCAGATTTTTTTTTTTTTTTTCGCGATCCTAGGGCGATCA	0.28	0.07	0.97
968	GGGGACCAGGTGCCGTAAGTCGAAAAGCGAAGCCGGACAGGCAGCGACAGCCCTGACAGACAAGACTCTCCTAGCTGCGGCCGGAACCGGCCCGGTCGCGTTCCTGAAACGCAGATGTGCCTACAGCCGCACGCGATCCTAGGGCGATCA	0.36	0.14	1.15
969	GGGGACCAGGTGCCGTAAGCCGAGTCATTAAGCCGGACAGGCAGCGACAGCCCTGACAGACAAGACTCTCCTAGCTGCGGCCGGAACCGGCCCGGTCGCGTTCCTGAAACGCAGATTTTTTTTTTTTTTTTCGCGATCCTAGGGCGATCA	0.27	0.22	0.95
970	GGGGACCAGGTGCCGTAAGGACGGCGCCAAAGCCGGACAGGCAGCGACAGCCCTGACAGACAAGACTCTCCTAGCGCCGGAACCGGCTTCACCGGTCGCGTTCCTGAAACGCAGATGTGCCTACAGCCGCACGCGATCCTAGGGCGATCA	0.12	0.08	1.22
971	GGGGACCAGGTGCCGTAAGAAGCTGTTGTAAGCCGGACAGGCAGCGACAGCCCTGACAGACAAGACTCTCCTAGCGCCGGAACCGGCTTCACCGGTCGCGTTCCTGAAACGCAGATTTTTTTTTTTTTTTTCGCGATCCTAGGGCGATCA	0.29	0.13	1.06
972	GGGGACCAGGTGCCGTAAGGCGGGCGGTAAAGCCGGACAGGCAGCGACAGCCCTGACAGACAAGACTCTCCTGCCGGAACCGGCGTCTTCACCGGTCGCGTTCCTGAAACGCAGATGTGCCTACAGCCGCACGCGATCCTAGGGCGATCA	0.19	0.08	1.28
973	GGGGACCAGGTGCCGTAAGAGGCTCGATAAAGCCGGACAGGCAGCGACAGCCCTGACAGACAAGACTCTCCTGCCGGAACCGGCGTCTTCACCGGTCGCGTTCCTGAAACGCAGATTTTTTTTTTTTTTTTCGCGATCCTAGGGCGATCA	0.16	0.07	0.85
974	GGGGACCAGGTGCCGTAAGAGTACAGACTAAGCCGGACAGGCAGCGACAGCCCTGACAGACAAGACTCGCCGGAACCGGCCCTCGTCTTCACCGGTCGCGTTCCTGAAACGCAGATGTGCCTACAGCCGCACGCGATCCTAGGGCGATCA	0.23	0.08	1.17
975	GGGGACCAGGTGCCGTAAGCTACTCGCAGAAGCCGGACAGGCAGCGACAGCCCTGACAGACAAGACTCGCCGGAACCGGCCCTCGTCTTCACCGGTCGCGTTCCTGAAACGCAGATTTTTTTTTTTTTTTTCGCGATCCTAGGGCGATCA	0.22	0.12	0.95
976	GGGGACCAGGTGCCGTAAGCTCCATTCATAAGCCGGACAGGCAGCGACAGCCCTGACAGACAAGAGCCGGAACCGGCCGTCCTCGTCTTCACCGGTCGCGTTCCTGAAACGCAGATGTGCCTACAGCCGCACGCGATCCTAGGGCGATCA	0.31	0.07	1.22
977	GGGGACCAGGTGCCGTAAGATCCGTCCTAAAGCCGGACAGGCAGCGACAGCCCTGACAGACAAGAGCCGGAACCGGCCGTCCTCGTCTTCACCGGTCGCGTTCCTGAAACGCAGATTTTTTTTTTTTTTTTCGCGATCCTAGGGCGATCA	0.23	0.07	0.98
978	GGGGACCAGGTGCCGTAAGGTTCGCATGAAAGCCGGACAGGCAGCGACAGCCCTGACAGACGCCGGAACCGGCGCTGCGTCCTCGTCTTCACCGGTCGCGTTCCTGAAACGCAGATGTGCCTACAGCCGCACGCGATCCTAGGGCGATCA	0.13	0.04	1.36
979	GGGGACCAGGTGCCGTAAGTTTGCACACCAAGCCGGACAGGCAGCGACAGCCCTGACAGACGCCGGAACCGGCGCTGCGTCCTCGTCTTCACCGGTCGCGTTCCTGAAACGCAGATTTTTTTTTTTTTTTTCGCGATCCTAGGGCGATCA	0.21	0.07	1.05
980	GGGGACCAGGTGCCGTAAGGCTACTAAGCAAGCCGGACAGGCAGCGACAGCCCTGACAGCCGGAACCGGCCTAGCTGCGTCCTCGTCTTCACCGGTCGCGTTCCTGAAACGCAGATGTGCCTACAGCCGCACGCGATCCTAGGGCGATCA	0.2	0.06	1.28
981	GGGGACCAGGTGCCGTAAGGCCTGACACGAAGCCGGACAGGCAGCGACAGCCCTGACAGCCGGAACCGGCCTAGCTGCGTCCTCGTCTTCACCGGTCGCGTTCCTGAAACGCAGATTTTTTTTTTTTTTTTCGCGATCCTAGGGCGATCA	0.15	0.07	1
982	GGGGACCAGGTGCCGTAAGGTAGATAGTAAAGCCGGACAGGCAGCGACAGCCCTGAGCCGGAACCGGCTCCTAGCTGCGTCCTCGTCTTCACCGGTCGCGTTCCTGAAACGCAGATGTGCCTACAGCCGCACGCGATCCTAGGGCGATCA	0.23	0.07	1.52
983	GGGGACCAGGTGCCGTAAGGGCGCACTTTAAGCCGGACAGGCAGCGACAGCCCTGAGCCGGAACCGGCTCCTAGCTGCGTCCTCGTCTTCACCGGTCGCGTTCCTGAAACGCAGATTTTTTTTTTTTTTTTCGCGATCCTAGGGCGATCA	0.2	0.08	1.07
984	GGGGACCAGGTGCCGTAAGTCATGCTCAGAAGCCGGACAGGCAGCGACAGCCCTGCCGGAACCGGCTCTCCTAGCTGCGTCCTCGTCTTCACCGGTCGCGTTCCTGAAACGCAGATGTGCCTACAGCCGCACGCGATCCTAGGGCGATCA	0.24	0.07	1.35
985	GGGGACCAGGTGCCGTAAGTCCTTACGTGAAGCCGGACAGGCAGCGACAGCCCTGCCGGAACCGGCTCTCCTAGCTGCGTCCTCGTCTTCACCGGTCGCGTTCCTGAAACGCAGATTTTTTTTTTTTTTTTCGCGATCCTAGGGCGATCA	0.17	0.09	1.05
986	GGGGACCAGGTGCCGTAAGTCCGATTTACAAGCCGGACAGGCAGCGACAGCGCCGGAACCGGCGACTCTCCTAGCTGCGTCCTCGTCTTCACCGGTCGCGTTCCTGAAACGCAGATGTGCCTACAGCCGCACGCGATCCTAGGGCGATCA	0.57	0.07	1.33
987	GGGGACCAGGTGCCGTAAGTAGGCTCGCGAAGCCGGACAGGCAGCGACAGCGCCGGAACCGGCGACTCTCCTAGCTGCGTCCTCGTCTTCACCGGTCGCGTTCCTGAAACGCAGATTTTTTTTTTTTTTTTCGCGATCCTAGGGCGATCA	0.2	0.07	1.13
988	GGGGACCAGGTGCCGTAAGAGTAACTCATAAGCCGGACAGGCAGCGACAGGCCGGAACCGGCAGACTCTCCTAGCTGCGTCCTCGTCTTCACCGGTCGCGTTCCTGAAACGCAGATGTGCCTACAGCCGCACGCGATCCTAGGGCGATCA	0.24	0.07	1.32
989	GGGGACCAGGTGCCGTAAGCAATAGGAGCAAGCCGGACAGGCAGCGACAGGCCGGAACCGGCAGACTCTCCTAGCTGCGTCCTCGTCTTCACCGGTCGCGTTCCTGAAACGCAGATTTTTTTTTTTTTTTTCGCGATCCTAGGGCGATCA	0.17	0.07	1.09
990	GGGGACCAGGTGCCGTAAGGATTCGTGTGAAGCCGGACAGGCAGCGAGCCGGAACCGGCACAAGACTCTCCTAGCTGCGTCCTCGTCTTCACCGGTCGCGTTCCTGAAACGCAGATGTGCCTACAGCCGCACGCGATCCTAGGGCGATCA	0.26	0.08	1.35
991	GGGGACCAGGTGCCGTAAGTAGGTGTAGTAAGCCGGACAGGCAGCGAGCCGGAACCGGCACAAGACTCTCCTAGCTGCGTCCTCGTCTTCACCGGTCGCGTTCCTGAAACGCAGATTTTTTTTTTTTTTTTCGCGATCCTAGGGCGATCA	0.22	0.1	0.94
992	GGGGACCAGGTGCCGTAAGTCCGGTAGATAAGCCGGACAGGCAGGCCGGAACCGGCCAGACAAGACTCTCCTAGCTGCGTCCTCGTCTTCACCGGTCGCGTTCCTGAAACGCAGATGTGCCTACAGCCGCACGCGATCCTAGGGCGATCA	0.15	0.06	1.25
993	GGGGACCAGGTGCCGTAAGAGAAGCCTAAAAGCCGGACAGGCAGGCCGGAACCGGCCAGACAAGACTCTCCTAGCTGCGTCCTCGTCTTCACCGGTCGCGTTCCTGAAACGCAGATTTTTTTTTTTTTTTTCGCGATCCTAGGGCGATCA	0.16	0.08	1
994	GGGGACCAGGTGCCGTAAGGCCTGTGACAAAGCCGGACAGGCCGGAACCGGCCTGACAGACAAGACTCTCCTAGCTGCGTCCTCGTCTTCACCGGTCGCGTTCCTGAAACGCAGATGTGCCTACAGCCGCACGCGATCCTAGGGCGATCA	0.19	0.07	1.24
995	GGGGACCAGGTGCCGTAAGGCCTTTAGAAAAGCCGGACAGGCCGGAACCGGCCTGACAGACAAGACTCTCCTAGCTGCGTCCTCGTCTTCACCGGTCGCGTTCCTGAAACGCAGATTTTTTTTTTTTTTTTCGCGATCCTAGGGCGATCA	0.16	0.12	1.08
996	GGGGACCAGGTGCCGTAAGTCAGCTTAGAAAGCCGGAGCCGGAACCGGCGCCCTGACAGACAAGACTCTCCTAGCTGCGTCCTCGTCTTCACCGGTCGCGTTCCTGAAACGCAGATGTGCCTACAGCCGCACGCGATCCTAGGGCGATCA	0.19	0.07	1.34
997	GGGGACCAGGTGCCGTAAGAAAGAGGTTAAAGCCGGAGCCGGAACCGGCGCCCTGACAGACAAGACTCTCCTAGCTGCGTCCTCGTCTTCACCGGTCGCGTTCCTGAAACGCAGATTTTTTTTTTTTTTTTCGCGATCCTAGGGCGATCA	0.15	0.08	1.09
998	GGGGACCAGGTGCCGTAAGGGGATACTCGAAGCGCCGGAACCGGCGACAGCCCTGACAGACAAGACTCTCCTAGCTGCGTCCTCGTCTTCACCGGTCGCGTTCCTGAAACGCAGATGTGCCTACAGCCGCACGCGATCCTAGGGCGATCA	0.16	0.06	1.22
999	GGGGACCAGGTGCCGTAAGCATGCCGCGTAAGCGCCGGAACCGGCGACAGCCCTGACAGACAAGACTCTCCTAGCTGCGTCCTCGTCTTCACCGGTCGCGTTCCTGAAACGCAGATTTTTTTTTTTTTTTTCGCGATCCTAGGGCGATCA	0.13	0.07	0.98
1000	GGGGACCAGGTGCCGTAAGTAGACGTTGAGCCGGAACCGGCCAGCGACAGCCCTGACAGACAAGACTCTCCTAGCTGCGTCCTCGTCTTCACCGGTCGCGTTCCTGAAACGCAGATGTGCCTACAGCCGCACGCGATCCTAGGGCGATCA	0.14	0.06	1.28
1001	GGGGACCAGGTGCCGTAAGGATCGGGTAAGCCGGAACCGGCCAGCGACAGCCCTGACAGACAAGACTCTCCTAGCTGCGTCCTCGTCTTCACCGGTCGCGTTCCTGAAACGCAGATTTTTTTTTTTTTTTTCGCGATCCTAGGGCGATCA	0.17	0.08	0.98
1002	GGGGACCAGGTGCCGTAAGACCCAGATCGGCACTAAATCGGAACCCTAAAGGGTTTTTTTTTTTTTTTGCTTGACGGGGAAAGCCGGCGAACGTGGCGAGAAAGGAAGGGAAGAACGGAAGACTCTCCTCCGGCGATCCTAGGGCGATCA	0.2	3.48	0.9
1003	GGGGACCAGGTGCCGTAAGGTCCCTTAACGCACTAAATCGGAACCCTAAAGGGTTTTTTTTTTTTTTTGCTTGACGGGGAAAGCCGGCGAACGTGGCGAGAAAGGAAGGGAACGGAAGACTCTCCTCCGGAAGCGATCCTAGGGCGATCA	0.21	3.72	1.06
1004	GGGGACCAGGTGCCGTAAGTATGACTTCTGCACTAAATCGGAACCCTAAAGGGTTTTTTTTTTTTTTTGCTTGACGGGGAAAGCCGGCGAACGTGGCGAGAAAGGCGGAAGACTCTCCTCCGCCTAGCGGAAGCGATCCTAGGGCGATCA	NaN	1.31	1
1005	GGGGACCAGGTGCCGTAAGCCTGTAAACCGCACTAAATCGGAACCCTAAAGGGTTTTTTTTTTTTTTTGCTTGACGGGGAAAGCCGGCGAACGTGGCGCGGAAGACTCTCCTCCGAGCGCCACCTAGCGGAAGCGATCCTAGGGCGATCA	0.12	8.07	0.87
1006	GGGGACCAGGTGCCGTAAGCGGACTAACCGCACTAAATCGGAACCCTAAAGGGTTTTTTTTTTTTTTTGCTTGACGGGGAAAGCCGGCGAACGTGCGGAAGACTCTCCTCCGGAAAGCGCCACCTAGCGGAAGCGATCCTAGGGCGATCA	0.18	4.11	0.96
1007	GGGGACCAGGTGCCGTAAGGCATGATCCCGCACTAAATCGGAACCCTAAAGGGTTTTTTTTTTTTTTTGCTTGACGGGGAAAGCCGGCGAACGGAAGACTCTCCTCCGGGAAGAAAGCGCCACCTAGCGGAAGCGATCCTAGGGCGATCA	0.37	4.73	0.95
1008	GGGGACCAGGTGCCGTAAGTGTAAGGCAAGCACTAAATCGGAACCCTAAAGGGTTTTTTTTTTTTTTTGCTTGACGGGGAAAGCCGGCCGGAAGACTCTCCTCCGAAGGGAAGAAAGCGCCACCTAGCGGAAGCGATCCTAGGGCGATCA	0.41	12.28	0.86
1009	GGGGACCAGGTGCCGTAAGCCGCGAGACTGCACTAAATCGGAACCCTAAAGGGTTTTTTTTTTTTTTTGCTTGACGGGGAAAGCCGGAAGACTCTCCTCCGAAGGAAGGGAAGAAAGCGCCACCTAGCGGAAGCGATCCTAGGGCGATCA	0.26	14.85	0.99
1010	GGGGACCAGGTGCCGTAAGCATTGCTGCGGCACTAAATCGGAACCCTAAAGGGTTTTTTTTTTTTTTTGCTTGACGGGGAACGGAAGACTCTCCTCCGAGAAAGGAAGGGAAGAAAGCGCCACCTAGCGGAAGCGATCCTAGGGCGATCA	0.27	7.08	0.92
1011	GGGGACCAGGTGCCGTAAGAGAGAACGGCGCACTAAATCGGAACCCTAAAGGGTTTTTTTTTTTTTTTGCTTGACGGCGGAAGACTCTCCTCCGGGCGAGAAAGGAAGGGAAGAAAGCGCCACCTAGCGGAAGCGATCCTAGGGCGATCA	0.29	3.93	0.85
1012	GGGGACCAGGTGCCGTAAGTCCATATGATGCACTAAATCGGAACCCTAAAGGGTTTTTTTTTTTTTTTGCTTGACGGAAGACTCTCCTCCGCGTGGCGAGAAAGGAAGGGAAGAAAGCGCCACCTAGCGGAAGCGATCCTAGGGCGATCA	NaN	NaN	1.1
1013	GGGGACCAGGTGCCGTAAGGTAACCTTAAGCACTAAATCGGAACCCTAAAGGGTTTTTTTTTTTTTTTGCCGGAAGACTCTCCTCCGCGAACGTGGCGAGAAAGGAAGGGAAGAAAGCGCCACCTAGCGGAAGCGATCCTAGGGCGATCA	NaN	NaN	1.12
1014	GGGGACCAGGTGCCGTAAGCGCTACCGTTGCACTACGGAAGACTCTCCTCCGGTTTTTTTTTTTTTTTGCTTGACGGGGAAAGCCGGCGAACGTGGCGAGAAAGGAAGGGAAGAAAGCGCCACCTAGCGGAAGCGATCCTAGGGCGATCA	0.11	4.01	1.24
1015	GGGGACCAGGTGCCGTAAGATCAAATAGCGCACTAAATCGGAACCCTAAAGGGTTTTTTTTTTTTTTTGCTTGACGGGGAAAGCCGGCGAACGTGGCGAGAAAGGAAGGGAAGAAAGCGCCACATGACTCATGCGATCCTAGGGCGATCA	0.76	0.14	0.91
1016	GGGGACCAGGTGCCGTAAGCCGCTCCAAGGCACTAAATCGGAACCCTAAAGGGTTTTTTTTTTTTTTTGCTTGACGGGGAAAGCCGGCGAACGTGGCGAGAAAGGAAGGGAAGAAAGCGCATGACTCATGAAGCGATCCTAGGGCGATCA	0.55	0.08	0.83
1017	GGGGACCAGGTGCCGTAAGCAAGACACTTGCACTAAATCGGAACCCTAAAGGGTTTTTTTTTTTTTTTGCTTGACGGGGAAAGCCGGCGAACGTGGCGAGAAAGGAAGGGAAGATGACTCATCCTAGCGGAAGCGATCCTAGGGCGATCA	2.56	0.16	0.92
1018	GGGGACCAGGTGCCGTAAGGGCGCCTCTGGCACTAAATCGGAACCCTAAAGGGTTTTTTTTTTTTTTTGCTTGACGGGGAAAGCCGGCGAACGTGGCGAGAAAGGAATGACTCATAGCGCCACCTAGCGGAAGCGATCCTAGGGCGATCA	1.57	0.07	1.1
1019	GGGGACCAGGTGCCGTAAGCCCGTCTCGCGCACTAAATCGGAACCCTAAAGGGTTTTTTTTTTTTTTTGCTTGACGGGGAAAGCCGGCGAACGTGGCGAGAAAATGACTCATGAAAGCGCCACCTAGCGGAAGCGATCCTAGGGCGATCA	0.79	0.08	0.83
1020	GGGGACCAGGTGCCGTAAGGCCGATCAGTGCACTAAATCGGAACCCTAAAGGGTTTTTTTTTTTTTTTGCTTGACGGGGAAAGCCGGCGAACGTGGCGAATGACTCATGGAAGAAAGCGCCACCTAGCGGAAGCGATCCTAGGGCGATCA	0.61	0.11	0.96
1021	GGGGACCAGGTGCCGTAAGAAGGCAACGGGCACTAAATCGGAACCCTAAAGGGTTTTTTTTTTTTTTTGCTTGACGGGGAAAGCCGGCGAACGTGGATGACTCATAAGGGAAGAAAGCGCCACCTAGCGGAAGCGATCCTAGGGCGATCA	2.16	0.1	1.08
1022	GGGGACCAGGTGCCGTAAGCCGGTATGTCGCACTAAATCGGAACCCTAAAGGGTTTTTTTTTTTTTTTGCTTGACGGGGAAAGCCGGCGAACATGACTCATAAGGAAGGGAAGAAAGCGCCACCTAGCGGAAGCGATCCTAGGGCGATCA	1.15	0.15	1.21
1023	GGGGACCAGGTGCCGTAAGCAGCAGTTCTGCACTAAATCGGAACCCTAAAGGGTTTTTTTTTTTTTTTGCTTGACGGGGAAAGCCGGCGATGACTCATAGAAAGGAAGGGAAGAAAGCGCCACCTAGCGGAAGCGATCCTAGGGCGATCA	1.97	0.09	0.85
1024	GGGGACCAGGTGCCGTAAGTACGGCTCCCGCACTAAATCGGAACCCTAAAGGGTTTTTTTTTTTTTTTGCTTGACGGGGAAAGCCATGACTCATGGCGAGAAAGGAAGGGAAGAAAGCGCCACCTAGCGGAAGCGATCCTAGGGCGATCA	NaN	NaN	0.67
1025	GGGGACCAGGTGCCGTAAGCGTCCGACTTGCACTAAATCGGAACCCTAAAGGGTTTTTTTTTTTTTTTGCTTGACGGGGAAAATGACTCATCGTGGCGAGAAAGGAAGGGAAGAAAGCGCCACCTAGCGGAAGCGATCCTAGGGCGATCA	1.3	0.1	0.7
1026	GGGGACCAGGTGCCGTAAGGTGACCGGTTGCACTAAATCGGAACCCTAAAGGGTTTTTTTTTTTTTTTGCTTGACGGGATGACTCATCGAACGTGGCGAGAAAGGAAGGGAAGAAAGCGCCACCTAGCGGAAGCGATCCTAGGGCGATCA	2.59	0.1	0.85
1027	GGGGACCAGGTGCCGTAAGGCGGTCACGGGCACTAAATCGGAACCCTAAAGGGTTTTTTTTTTTTTTTGCTATGACTCATAAGCCGGCGAACGTGGCGAGAAAGGAAGGGAAGAAAGCGCCACCTAGCGGAAGCGATCCTAGGGCGATCA	2.32	0.07	0.79
1028	GGGGACCAGGTGCCGTAAGGGACGAGTGTGCACTAAATCGGAACCCTAAAGGGTTTTTTTTTTTTTTTATGACTCATGGAAAGCCGGCGAACGTGGCGAGAAAGGAAGGGAAGAAAGCGCCACCTAGCGGAAGCGATCCTAGGGCGATCA	1.02	0.08	1.01
1029	GGGGACCAGGTGCCGTAAGCCACTATTCGGCACTAAATCGGAAATGACTCATGTTTTTTTTTTTTTTTGCTTGACGGGGAAAGCCGGCGAACGTGGCGAGAAAGGAAGGGAAGAAAGCGCCACCTAGCGGAAGCGATCCTAGGGCGATCA	0.95	0.1	0.97
1030	GGGGACCAGGTGCCGTAAGGATCTTGACAGCACTAAATGACTCATCTAAAGGGTTTTTTTTTTTTTTTGCTTGACGGGGAAAGCCGGCGAACGTGGCGAGAAAGGAAGGGAAGAAAGCGCCACCTAGCGGAAGCGATCCTAGGGCGATCA	NaN	0.22	0.56
1031	GGGGACCAGGTGCCGTAAGATGAGAGGCAGCACTAAATCGGAACCCTAAAGGGTTTTTTTTTTTTTTTGCTTGACGGGGAAAGCCGGCGAACGTGGCGAGAAAGGAAGGGAAGAAAGCGCGCCGGAACCGGCGCGATCCTAGGGCGATCA	NaN	NaN	NaN
1032	GGGGACCAGGTGCCGTAAGGCTACGTACTGCACTAAATCGGAACCCTAAAGGGTTTTTTTTTTTTTTTGCTTGACGGGGAAAGCCGGCGAACGTGGCGAGAAAGGAAGGGAAGAAAGGCCGGAACCGGCGAAGCGATCCTAGGGCGATCA	0.23	0.06	0.8
1033	GGGGACCAGGTGCCGTAAGCAGGACTGTCGCACTAAATCGGAACCCTAAAGGGTTTTTTTTTTTTTTTGCTTGACGGGGAAAGCCGGCGAACGTGGCGAGAAAGGAAGGGGCCGGAACCGGCCCTAGCGGAAGCGATCCTAGGGCGATCA	0.23	0.18	0.94
1034	GGGGACCAGGTGCCGTAAGAGGCGACCACGCACTAAATCGGAACCCTAAAGGGTTTTTTTTTTTTTTTGCTTGACGGGGAAAGCCGGCGAACGTGGCGAGAAAGCCGGAACCGGCAGCGCCACCTAGCGGAAGCGATCCTAGGGCGATCA	0.27	0.17	0.95
1035	GGGGACCAGGTGCCGTAAGACTGGTAGGAGCACTAAATCGGAACCCTAAAGGGTTTTTTTTTTTTTTTGCTTGACGGGGAAAGCCGGCGAACGTGGCGAGGCCGGAACCGGCGAAAGCGCCACCTAGCGGAAGCGATCCTAGGGCGATCA	NaN	0.03	1.06
1036	GGGGACCAGGTGCCGTAAGAGGTTTGTGCGCACTAAATCGGAACCCTAAAGGGTTTTTTTTTTTTTTTGCTTGACGGGGAAAGCCGGCGAACGTGGGCCGGAACCGGCGGAAGAAAGCGCCACCTAGCGGAAGCGATCCTAGGGCGATCA	0.13	0.11	0.88
1037	GGGGACCAGGTGCCGTAAGCCTTTACAGGGCACTAAATCGGAACCCTAAAGGGTTTTTTTTTTTTTTTGCTTGACGGGGAAAGCCGGCGAACGGCCGGAACCGGCAAGGGAAGAAAGCGCCACCTAGCGGAAGCGATCCTAGGGCGATCA	0.18	0.25	1.13
1038	GGGGACCAGGTGCCGTAAGCTCCCTGCCGGCACTAAATCGGAACCCTAAAGGGTTTTTTTTTTTTTTTGCTTGACGGGGAAAGCCGGCGGCCGGAACCGGCAAGGAAGGGAAGAAAGCGCCACCTAGCGGAAGCGATCCTAGGGCGATCA	0.21	0.2	0.92
1039	GGGGACCAGGTGCCGTAAGAGTCTTTACAGCACTAAATCGGAACCCTAAAGGGTTTTTTTTTTTTTTTGCTTGACGGGGAAAGCCGGCCGGAACCGGCAGAAAGGAAGGGAAGAAAGCGCCACCTAGCGGAAGCGATCCTAGGGCGATCA	NaN	NaN	0.95
1040	GGGGACCAGGTGCCGTAAGTGCCCGTTCAGCACTAAATCGGAACCCTAAAGGGTTTTTTTTTTTTTTTGCTTGACGGGGAAAGCCGGAACCGGCGGCGAGAAAGGAAGGGAAGAAAGCGCCACCTAGCGGAAGCGATCCTAGGGCGATCA	0.48	0.09	0.98
1041	GGGGACCAGGTGCCGTAAGTCCGGCGTGTGCACTAAATCGGAACCCTAAAGGGTTTTTTTTTTTTTTTGCTTGACGGGGGCCGGAACCGGCCGTGGCGAGAAAGGAAGGGAAGAAAGCGCCACCTAGCGGAAGCGATCCTAGGGCGATCA	0.29	0.06	0.74
1042	GGGGACCAGGTGCCGTAAGGTACGATCTCGCACTAAATCGGAACCCTAAAGGGTTTTTTTTTTTTTTTGCTTGACGCCGGAACCGGCCGAACGTGGCGAGAAAGGAAGGGAAGAAAGCGCCACCTAGCGGAAGCGATCCTAGGGCGATCA	0.24	0.13	0.99
1043	GGGGACCAGGTGCCGTAAGGATATGCGAAGCACTAAATCGGAACCCTAAAGGGTTTTTTTTTTTTTTTGCCGGAACCGGCAAGCCGGCGAACGTGGCGAGAAAGGAAGGGAAGAAAGCGCCACCTAGCGGAAGCGATCCTAGGGCGATCA	0.24	0.17	0.78
1044	GGGGACCAGGTGCCGTAAGGATCTGCGCTGCACTAAATCGGCCGGAACCGGCGTTTTTTTTTTTTTTTGCTTGACGGGGAAAGCCGGCGAACGTGGCGAGAAAGGAAGGGAAGAAAGCGCCACCTAGCGGAAGCGATCCTAGGGCGATCA	0.35	0.08	0.79
1045	GGGGACCAGGTGCCGTAAGCTGCGCTTCAGCACGCCGGAACCGGCCTAAAGGGTTTTTTTTTTTTTTTGCTTGACGGGGAAAGCCGGCGAACGTGGCGAGAAAGGAAGGGAAGAAAGCGCCACCTAGCGGAAGCGATCCTAGGGCGATCA	0.82	0.09	1.16
1046	GGGGACCAGGTGCCGTAAGCGCCTTAGAAAAGCCGGACAGGCAGCGACAGCCCTTTTTTTTTTTTTTTTCCTAGCTGCGTCCTCGTCTTCACCGGTCGCGTTCCTGAAACGCAGACGGAAGACTCTCCTCCGGCGATCCTAGGGCGATCA	0.17	1.97	0.99
1047	GGGGACCAGGTGCCGTAAGCCGTGGTGCTAAGCCGGACAGGCAGCGACAGCCCTTTTTTTTTTTTTTTTCCTAGCTGCGTCCTCGTCTTCACCGGTCGCGTTCCTGAAACGCCGGAAGACTCTCCTCCGCACGCGATCCTAGGGCGATCA	0.12	2.81	0.96
1048	GGGGACCAGGTGCCGTAAGCAGGACGAGCAAGCCGGACAGGCAGCGACAGCCCTTTTTTTTTTTTTTTTCCTAGCTGCGTCCTCGTCTTCACCGGTCGCGTTCCTCGGAAGACTCTCCTCCGACAGCCGCACGCGATCCTAGGGCGATCA	0.22	9.45	0.89
1049	GGGGACCAGGTGCCGTAAGCAACCGAGTAAAGCCGGACAGGCAGCGACAGCCCTTTTTTTTTTTTTTTTCCTAGCTGCGTCCTCGTCTTCACCGGTCGCGGAAGACTCTCCTCCGTGTGCCTACAGCCGCACGCGATCCTAGGGCGATCA	0.23	2.1	0.91
1050	GGGGACCAGGTGCCGTAAGTGCACACGTAAAGCCGGACAGGCAGCGACAGCCCTTTTTTTTTTTTTTTTCCTAGCTGCGTCCTCGTCTTCACCGGCGGAAGACTCTCCTCCGAGATGTGCCTACAGCCGCACGCGATCCTAGGGCGATCA	0.19	5.08	0.91
1051	GGGGACCAGGTGCCGTAAGCGATACCCAAAAGCCGGACAGGCAGCGACAGCCCTTTTTTTTTTTTTTTTCCTAGCTGCGTCCTCGTCTTCACGGAAGACTCTCCTCCGACGCAGATGTGCCTACAGCCGCACGCGATCCTAGGGCGATCA	0.21	5.59	0.92
1052	GGGGACCAGGTGCCGTAAGCTTCGGGCGGAAGCCGGACAGGCAGCGACAGCCCTTTTTTTTTTTTTTTTCCTAGCTGCGTCCTCGTCTCGGAAGACTCTCCTCCGGAAACGCAGATGTGCCTACAGCCGCACGCGATCCTAGGGCGATCA	0.27	8.82	0.94
1053	GGGGACCAGGTGCCGTAAGAAGACCTTACAAGCCGGACAGGCAGCGACAGCCCTTTTTTTTTTTTTTTTCCTAGCTGCGTCCTCCGGAAGACTCTCCTCCGTCCTGAAACGCAGATGTGCCTACAGCCGCACGCGATCCTAGGGCGATCA	0.28	3.03	0.96
1054	GGGGACCAGGTGCCGTAAGTACGTGTTACAAGCCGGACAGGCAGCGACAGCCCTTTTTTTTTTTTTTTTCCTAGCTGCGTCCGGAAGACTCTCCTCCGCGTTCCTGAAACGCAGATGTGCCTACAGCCGCACGCGATCCTAGGGCGATCA	0.3	4.33	0.84
1055	GGGGACCAGGTGCCGTAAGCCCGATCGACAAGCCGGACAGGCAGCGACAGCCCTTTTTTTTTTTTTTTTCCTAGCTGCGGAAGACTCTCCTCCGGTCGCGTTCCTGAAACGCAGATGTGCCTACAGCCGCACGCGATCCTAGGGCGATCA	0.18	3.03	0.91
1056	GGGGACCAGGTGCCGTAAGGGATACTAAAAAGCCGGACAGGCAGCGACAGCCCTTTTTTTTTTTTTTTTCCTAGCGGAAGACTCTCCTCCGCCGGTCGCGTTCCTGAAACGCAGATGTGCCTACAGCCGCACGCGATCCTAGGGCGATCA	0.28	1.36	0.92
1057	GGGGACCAGGTGCCGTAAGTGAATGCTCTAAGCCGGACAGGCAGCGACAGCCCTTTTTTTTTTTTTTTTCCGGAAGACTCTCCTCCGTTCACCGGTCGCGTTCCTGAAACGCAGATGTGCCTACAGCCGCACGCGATCCTAGGGCGATCA	0.26	3.34	0.94
1058	GGGGACCAGGTGCCGTAAGACTTCTCAATAAGCCGCGGAAGACTCTCCTCCGCTTTTTTTTTTTTTTTTCCTAGCTGCGTCCTCGTCTTCACCGGTCGCGTTCCTGAAACGCAGATGTGCCTACAGCCGCACGCGATCCTAGGGCGATCA	0.19	2.22	0.99
1059	GGGGACCAGGTGCCGTAAGACTCAGCGTCAAGCCGGACAGGCAGCGACAGCCCTTTTTTTTTTTTTTTTCCTAGCTGCGTCCTCGTCTTCACCGGTCGCGTTCCTGAAACGCAGATGTGCCTAATGACTCATGCGATCCTAGGGCGATCA	0.91	0.06	0.87
1060	GGGGACCAGGTGCCGTAAGTTAACAGCTTAAGCCGGACAGGCAGCGACAGCCCTTTTTTTTTTTTTTTTCCTAGCTGCGTCCTCGTCTTCACCGGTCGCGTTCCTGAAACGCAGATGTGCATGACTCATCACGCGATCCTAGGGCGATCA	2.27	0.06	0.91
1061	GGGGACCAGGTGCCGTAAGCAACATATTTAAGCCGGACAGGCAGCGACAGCCCTTTTTTTTTTTTTTTTCCTAGCTGCGTCCTCGTCTTCACCGGTCGCGTTCCTGAAACGCAATGACTCATACAGCCGCACGCGATCCTAGGGCGATCA	2.16	0.07	0.86
1062	GGGGACCAGGTGCCGTAAGCGCAACGCGGAAGCCGGACAGGCAGCGACAGCCCTTTTTTTTTTTTTTTTCCTAGCTGCGTCCTCGTCTTCACCGGTCGCGTTCCTGATGACTCATTGTGCCTACAGCCGCACGCGATCCTAGGGCGATCA	1.84	0.07	0.95
1063	GGGGACCAGGTGCCGTAAGCCTACGGTGTAAGCCGGACAGGCAGCGACAGCCCTTTTTTTTTTTTTTTTCCTAGCTGCGTCCTCGTCTTCACCGGTCGCGTTCATGACTCATAGATGTGCCTACAGCCGCACGCGATCCTAGGGCGATCA	1.43	0.06	0.83
1064	GGGGACCAGGTGCCGTAAGCGCTATGGTAAAGCCGGACAGGCAGCGACAGCCCTTTTTTTTTTTTTTTTCCTAGCTGCGTCCTCGTCTTCACCGGTCGCATGACTCATACGCAGATGTGCCTACAGCCGCACGCGATCCTAGGGCGATCA	2.03	0.05	0.95
1065	GGGGACCAGGTGCCGTAAGCGACGTGTGCAAGCCGGACAGGCAGCGACAGCCCTTTTTTTTTTTTTTTTCCTAGCTGCGTCCTCGTCTTCACCGGTATGACTCATGAAACGCAGATGTGCCTACAGCCGCACGCGATCCTAGGGCGATCA	1.72	0.05	0.86
1066	GGGGACCAGGTGCCGTAAGCACGCAGGCGAAGCCGGACAGGCAGCGACAGCCCTTTTTTTTTTTTTTTTCCTAGCTGCGTCCTCGTCTTCACATGACTCATTCCTGAAACGCAGATGTGCCTACAGCCGCACGCGATCCTAGGGCGATCA	1.05	0.07	0.85
1067	GGGGACCAGGTGCCGTAAGACCGAGTGGCAAGCCGGACAGGCAGCGACAGCCCTTTTTTTTTTTTTTTTCCTAGCTGCGTCCTCGTCTTATGACTCATCGTTCCTGAAACGCAGATGTGCCTACAGCCGCACGCGATCCTAGGGCGATCA	4	0.06	0.89
1068	GGGGACCAGGTGCCGTAAGACTAACAAGAAAGCCGGACAGGCAGCGACAGCCCTTTTTTTTTTTTTTTTCCTAGCTGCGTCCTCGATGACTCATGTCGCGTTCCTGAAACGCAGATGTGCCTACAGCCGCACGCGATCCTAGGGCGATCA	1.6	0.07	0.89
1069	GGGGACCAGGTGCCGTAAGAAATTCACGGAAGCCGGACAGGCAGCGACAGCCCTTTTTTTTTTTTTTTTCCTAGCTGCGTCCATGACTCATCCGGTCGCGTTCCTGAAACGCAGATGTGCCTACAGCCGCACGCGATCCTAGGGCGATCA	1.49	0.06	0.93
1070	GGGGACCAGGTGCCGTAAGTTCGTTGGGCAAGCCGGACAGGCAGCGACAGCCCTTTTTTTTTTTTTTTTCCTAGCTGCATGACTCATTTCACCGGTCGCGTTCCTGAAACGCAGATGTGCCTACAGCCGCACGCGATCCTAGGGCGATCA	1.53	0.05	0.76
1071	GGGGACCAGGTGCCGTAAGGTCTTTTCAAAAGCCGGACAGGCAGCGACAGCCCTTTTTTTTTTTTTTTTCCATGACTCATCCTCGTCTTCACCGGTCGCGTTCCTGAAACGCAGATGTGCCTACAGCCGCACGCGATCCTAGGGCGATCA	1.68	0.08	0.93
1072	GGGGACCAGGTGCCGTAAGGCGCATACCGAAGCCGGACAGGCAGCGACAGCCCTTTTTTTTTTTTTTTATGACTCATCGTCCTCGTCTTCACCGGTCGCGTTCCTGAAACGCAGATGTGCCTACAGCCGCACGCGATCCTAGGGCGATCA	4.1	0.07	0.86
1073	GGGGACCAGGTGCCGTAAGCAGGCGCCGAAAGCCGGACAGGCAATGACTCATCTTTTTTTTTTTTTTTTCCTAGCTGCGTCCTCGTCTTCACCGGTCGCGTTCCTGAAACGCAGATGTGCCTACAGCCGCACGCGATCCTAGGGCGATCA	3.2	0.07	0.97
1074	GGGGACCAGGTGCCGTAAGACGCTTACTTAAGCCGGATGACTCATGACAGCCCTTTTTTTTTTTTTTTTCCTAGCTGCGTCCTCGTCTTCACCGGTCGCGTTCCTGAAACGCAGATGTGCCTACAGCCGCACGCGATCCTAGGGCGATCA	1.34	0.07	0.87
1075	GGGGACCAGGTGCCGTAAGTGATTTCTGGAAGCCGGACAGGCAGCGACAGCCCTTTTTTTTTTTTTTTTCCTAGCTGCGTCCTCGTCTTCACCGGTCGCGTTCCTGAAACGCAGATGTGCGCCGGAACCGGCGCGATCCTAGGGCGATCA	NaN	NaN	NaN
1076	GGGGACCAGGTGCCGTAAGAGTCAGCTATAAGCCGGACAGGCAGCGACAGCCCTTTTTTTTTTTTTTTTCCTAGCTGCGTCCTCGTCTTCACCGGTCGCGTTCCTGAAACGCAGATGGCCGGAACCGGCCACGCGATCCTAGGGCGATCA	0.23	0.08	0.85
1077	GGGGACCAGGTGCCGTAAGGAACTTACAAAAGCCGGACAGGCAGCGACAGCCCTTTTTTTTTTTTTTTTCCTAGCTGCGTCCTCGTCTTCACCGGTCGCGTTCCTGAAACGCCGGAACCGGCACAGCCGCACGCGATCCTAGGGCGATCA	0.25	0.1	1.04
1078	GGGGACCAGGTGCCGTAAGGAAACCCGTGAAGCCGGACAGGCAGCGACAGCCCTTTTTTTTTTTTTTTTCCTAGCTGCGTCCTCGTCTTCACCGGTCGCGTTCGCCGGAACCGGCTGTGCCTACAGCCGCACGCGATCCTAGGGCGATCA	0.19	0.08	0.92
1079	GGGGACCAGGTGCCGTAAGGGACTTCAGGAAGCCGGACAGGCAGCGACAGCCCTTTTTTTTTTTTTTTTCCTAGCTGCGTCCTCGTCTTCACCGGTCGCGGCCGGAACCGGCAGATGTGCCTACAGCCGCACGCGATCCTAGGGCGATCA	0.23	0.05	0.85
1080	GGGGACCAGGTGCCGTAAGATTTAACCCAAAGCCGGACAGGCAGCGACAGCCCTTTTTTTTTTTTTTTTCCTAGCTGCGTCCTCGTCTTCACCGGTGCCGGAACCGGCACGCAGATGTGCCTACAGCCGCACGCGATCCTAGGGCGATCA	0.23	0.08	0.9
1081	GGGGACCAGGTGCCGTAAGTGAGGTTTAGAAGCCGGACAGGCAGCGACAGCCCTTTTTTTTTTTTTTTTCCTAGCTGCGTCCTCGTCTTCACCGCCGGAACCGGCGAAACGCAGATGTGCCTACAGCCGCACGCGATCCTAGGGCGATCA	0.21	0.08	0.94
1082	GGGGACCAGGTGCCGTAAGAGTCAACTGAAAGCCGGACAGGCAGCGACAGCCCTTTTTTTTTTTTTTTTCCTAGCTGCGTCCTCGTCTTGCCGGAACCGGCTCCTGAAACGCAGATGTGCCTACAGCCGCACGCGATCCTAGGGCGATCA	0.24	0.07	0.91
1083	GGGGACCAGGTGCCGTAAGGCGGCAGTCCAAGCCGGACAGGCAGCGACAGCCCTTTTTTTTTTTTTTTTCCTAGCTGCGTCCTCGTGCCGGAACCGGCCGTTCCTGAAACGCAGATGTGCCTACAGCCGCACGCGATCCTAGGGCGATCA	0.21	0.06	0.91
1084	GGGGACCAGGTGCCGTAAGGGTTGCACCAAAGCCGGACAGGCAGCGACAGCCCTTTTTTTTTTTTTTTTCCTAGCTGCGTCCGCCGGAACCGGCGTCGCGTTCCTGAAACGCAGATGTGCCTACAGCCGCACGCGATCCTAGGGCGATCA	0.26	0.06	0.94
1085	GGGGACCAGGTGCCGTAAGGACGACGCTGAAGCCGGACAGGCAGCGACAGCCCTTTTTTTTTTTTTTTTCCTAGCTGCGGCCGGAACCGGCCCGGTCGCGTTCCTGAAACGCAGATGTGCCTACAGCCGCACGCGATCCTAGGGCGATCA	0.32	0.25	0.88
1086	GGGGACCAGGTGCCGTAAGATCCGTGTTGAAGCCGGACAGGCAGCGACAGCCCTTTTTTTTTTTTTTTTCCTAGCGCCGGAACCGGCTTCACCGGTCGCGTTCCTGAAACGCAGATGTGCCTACAGCCGCACGCGATCCTAGGGCGATCA	0.31	0.1	0.87
1087	GGGGACCAGGTGCCGTAAGCTAATGGAGAAAGCCGGACAGGCAGCGACAGCCCTTTTTTTTTTTTTTTGCCGGAACCGGCCCTCGTCTTCACCGGTCGCGTTCCTGAAACGCAGATGTGCCTACAGCCGCACGCGATCCTAGGGCGATCA	0.34	0.07	0.93
1088	GGGGACCAGGTGCCGTAAGAGGCGCACCTAAGCCGGACAGGCCGGAACCGGCCTTTTTTTTTTTTTTTTCCTAGCTGCGTCCTCGTCTTCACCGGTCGCGTTCCTGAAACGCAGATGTGCCTACAGCCGCACGCGATCCTAGGGCGATCA	0.27	0.14	0.79
1089	GGGGACCAGGTGCCGTAAGGCCGCAATGCAAGCGCCGGAACCGGCGACAGCCCTTTTTTTTTTTTTTTTCCTAGCTGCGTCCTCGTCTTCACCGGTCGCGTTCCTGAAACGCAGATGTGCCTACAGCCGCACGCGATCCTAGGGCGATCA	0.16	0.07	0.96
1090	GGGGACCAGGTGCCGTAAGACTGTAGCGGGCACTAAATCGGAACCCTAAAGGGAGCCCCCGATTTAGAGCTTGACGGGGTTTTTTTTTTTTTTTGGCGAGAAAGGAAGGGAACGGAAGACTCTCCTCCGGAAGCGATCCTAGGGCGATCA	0.09	3.32	0.58
1091	GGGGACCAGGTGCCGTAAGAACAGCGTTTGCACTAAATCGGAACCCTAAAGGGAGCCCCCGATTTAGAGCTTGACGGGGTTTTTTTTTTTTTTTGGCGAGAAAGGCGGAAGACTCTCCTCCGCCTAGCGGAAGCGATCCTAGGGCGATCA	0.17	1.28	0.59
1092	GGGGACCAGGTGCCGTAAGCCGATTTGGGGCACTAAATCGGAACCCTAAAGGGAGCCCCCGATTTAGAGCTTGACGGGGTTTTTTTTTTTTTTTGGCGAGAACGGAAGACTCTCCTCCGCCACCTAGCGGAAGCGATCCTAGGGCGATCA	0.05	1.72	0.58
1093	GGGGACCAGGTGCCGTAAGGTGTCCTGATGCACTAAATCGGAACCCTAAAGGGAGCCCCCGATTTAGAGCTTGACGGGGTTTTTTTTTTTTTTTGGCGCGGAAGACTCTCCTCCGAGCGCCACCTAGCGGAAGCGATCCTAGGGCGATCA	0.07	7.12	0.6
1094	GGGGACCAGGTGCCGTAAGGCACCTGCTTGCACTAAATCGGAACCCTAAAGGGAGCCCCCGATTTAGAGCTTGACGGGGTTTTTTTTTTTTTTTGCGGAAGACTCTCCTCCGGAAAGCGCCACCTAGCGGAAGCGATCCTAGGGCGATCA	NaN	NaN	NaN
1095	GGGGACCAGGTGCCGTAAGATTTGATCAGGCACTAAATCGGAACCCTAAAGGGAGCCCCCCGGAAGACTCTCCTCCGGGTTTTTTTTTTTTTTTGGCGAGAAAGGAAGGGAAGAAAGCGCCACCTAGCGGAAGCGATCCTAGGGCGATCA	NaN	7.57	0.8
1096	GGGGACCAGGTGCCGTAAGGCTCTGCAAGGCACTAAATCGGAACCCTAAAGGGAGCCGGAAGACTCTCCTCCGACGGGGTTTTTTTTTTTTTTTGGCGAGAAAGGAAGGGAAGAAAGCGCCACCTAGCGGAAGCGATCCTAGGGCGATCA	0.2	8.32	0.64
1097	GGGGACCAGGTGCCGTAAGTAACTGGACTGCACTAAATCGGAACCCTAACGGAAGACTCTCCTCCGGAGCTTGACGGGGTTTTTTTTTTTTTTTGGCGAGAAAGGAAGGGAAGAAAGCGCCACCTAGCGGAAGCGATCCTAGGGCGATCA	0.24	4.88	0.74
1098	GGGGACCAGGTGCCGTAAGCCCTAAGTTAGCACTAAATCGGAACCCCGGAAGACTCTCCTCCGTTAGAGCTTGACGGGGTTTTTTTTTTTTTTTGGCGAGAAAGGAAGGGAAGAAAGCGCCACCTAGCGGAAGCGATCCTAGGGCGATCA	0.1	4.18	0.68
1099	GGGGACCAGGTGCCGTAAGATGGTCAACTGCACTAAATCGGACGGAAGACTCTCCTCCGCGATTTAGAGCTTGACGGGGTTTTTTTTTTTTTTTGGCGAGAAAGGAAGGGAAGAAAGCGCCACCTAGCGGAAGCGATCCTAGGGCGATCA	0.14	2.44	0.62
1100	GGGGACCAGGTGCCGTAAGGGTTTTCACGGCACTACGGAAGACTCTCCTCCGGAGCCCCCGATTTAGAGCTTGACGGGGTTTTTTTTTTTTTTTGGCGAGAAAGGAAGGGAAGAAAGCGCCACCTAGCGGAAGCGATCCTAGGGCGATCA	0.16	4.05	0.52
1101	GGGGACCAGGTGCCGTAAGTGCACTGGTGGCACTAAATCGGAACCCTAAAGGGAGCCCCCGATTTAGAGCTTGACGGGGTTTTTTTTTTTTTTTGGCGAGAAAGGAAGGGAAGAAAGCGCATGACTCATGAAGCGATCCTAGGGCGATCA	0.47	0.09	0.52
1102	GGGGACCAGGTGCCGTAAGCTGCATGCCTGCACTAAATCGGAACCCTAAAGGGAGCCCCCGATTTAGAGCTTGACGGGGTTTTTTTTTTTTTTTGGCGAGAAAGGAAGGGAAGATGACTCATCCTAGCGGAAGCGATCCTAGGGCGATCA	NaN	0.08	0.52
1103	GGGGACCAGGTGCCGTAAGATTGAATGCTGCACTAAATCGGAACCCTAAAGGGAGCCCCCGATTTAGAGCTTGACGGGGTTTTTTTTTTTTTTTGGCGAGAAAGGAAGGGATGACTCATCCACCTAGCGGAAGCGATCCTAGGGCGATCA	2.05	0.12	0.48
1104	GGGGACCAGGTGCCGTAAGTGCAAATAGAGCACTAAATCGGAACCCTAAAGGGAGCCCCCGATTTAGAGCTTGACGGGGTTTTTTTTTTTTTTTGGCGAGAAAGGAATGACTCATAGCGCCACCTAGCGGAAGCGATCCTAGGGCGATCA	1.52	0.1	0.57
1105	GGGGACCAGGTGCCGTAAGGGCCTCCAGAGCACTAAATCGGAACCCTAAAGGGAGCCCCCGATTTAGAGCTTGACGGGGTTTTTTTTTTTTTTTGGCGAGAAAATGACTCATGAAAGCGCCACCTAGCGGAAGCGATCCTAGGGCGATCA	0.48	0.23	0.35
1106	GGGGACCAGGTGCCGTAAGCCACCTGTGTGCACTAAATCGGAACCCTAAAGGGAGCCCCCGATTTAGAGCTTGACGGGGTTTTTTTTTTTTTTTGGCGAATGACTCATGGAAGAAAGCGCCACCTAGCGGAAGCGATCCTAGGGCGATCA	0.72	0.04	0.54
1107	GGGGACCAGGTGCCGTAAGACGCGATCTCGCACTAAATCGGAACCCTAAAGGGAGCCCCCGATTTAGAGCTTGACGGGGTTTTTTTTTTTTTTTGGATGACTCATAAGGGAAGAAAGCGCCACCTAGCGGAAGCGATCCTAGGGCGATCA	2.14	0.08	0.58
1108	GGGGACCAGGTGCCGTAAGCCTTTGCAATGCACTAAATCGGAACCCTAAAGGGAGCCCCCGATTTAGAATGACTCATGGTTTTTTTTTTTTTTTGGCGAGAAAGGAAGGGAAGAAAGCGCCACCTAGCGGAAGCGATCCTAGGGCGATCA	0.83	0.06	0.7
1109	GGGGACCAGGTGCCGTAAGCACCGTAAATGCACTAAATCGGAACCCTAAAGGGAGCCCCCGATTATGACTCATACGGGGTTTTTTTTTTTTTTTGGCGAGAAAGGAAGGGAAGAAAGCGCCACCTAGCGGAAGCGATCCTAGGGCGATCA	2.31	0.14	0.54
1110	GGGGACCAGGTGCCGTAAGTAACACTCGCGCACTAAATCGGAACCCTAAAGGGAGCCATGACTCATGAGCTTGACGGGGTTTTTTTTTTTTTTTGGCGAGAAAGGAAGGGAAGAAAGCGCCACCTAGCGGAAGCGATCCTAGGGCGATCA	0.46	0.08	0.65
1111	GGGGACCAGGTGCCGTAAGCGCTCTAAGAGCACTAAATCGGAACCCTAAAGGGAATGACTCATTTAGAGCTTGACGGGGTTTTTTTTTTTTTTTGGCGAGAAAGGAAGGGAAGAAAGCGCCACCTAGCGGAAGCGATCCTAGGGCGATCA	NaN	0.05	0.67
1112	GGGGACCAGGTGCCGTAAGATCCTTGCCAGCACTAAATCGGAACCCTAAAATGACTCATCGATTTAGAGCTTGACGGGGTTTTTTTTTTTTTTTGGCGAGAAAGGAAGGGAAGAAAGCGCCACCTAGCGGAAGCGATCCTAGGGCGATCA	1.1	0.1	0.47
1113	GGGGACCAGGTGCCGTAAGCCTTCGGGTGGCACTAAATCGGAAATGACTCATGAGCCCCCGATTTAGAGCTTGACGGGGTTTTTTTTTTTTTTTGGCGAGAAAGGAAGGGAAGAAAGCGCCACCTAGCGGAAGCGATCCTAGGGCGATCA	0.49	0.08	0.48
1114	GGGGACCAGGTGCCGTAAGCTCCTGAAGAGCACTAAATGACTCATCTAAAGGGAGCCCCCGATTTAGAGCTTGACGGGGTTTTTTTTTTTTTTTGGCGAGAAAGGAAGGGAAGAAAGCGCCACCTAGCGGAAGCGATCCTAGGGCGATCA	NaN	0.41	0.64
1115	GGGGACCAGGTGCCGTAAGGAATGTCCAAGCACTAAATCGGAACCCTAAAGGGAGCCCCCGATTTAGAGCTTGACGGGGTTTTTTTTTTTTTTTGGCGAGAAAGGAAGGGAAGAAAGGCCGGAACCGGCGAAGCGATCCTAGGGCGATCA	0.22	0.07	0.42
1116	GGGGACCAGGTGCCGTAAGTCGATCATGGGCACTAAATCGGAACCCTAAAGGGAGCCCCCGATTTAGAGCTTGACGGGGTTTTTTTTTTTTTTTGGCGAGAAAGGAAGGGGCCGGAACCGGCCCTAGCGGAAGCGATCCTAGGGCGATCA	0.06	0.12	0.46
1117	GGGGACCAGGTGCCGTAAGGATCCTGAACGCACTAAATCGGAACCCTAAAGGGAGCCCCCGATTTAGAGCTTGACGGGGTTTTTTTTTTTTTTTGGCGAGAAAGGAAGCCGGAACCGGCCCACCTAGCGGAAGCGATCCTAGGGCGATCA	0.1	0.12	0.51
1118	GGGGACCAGGTGCCGTAAGGAGTGAACTGGCACTAAATCGGAACCCTAAAGGGAGCCCCCGATTTAGAGCTTGACGGGGTTTTTTTTTTTTTTTGGCGAGAAAGCCGGAACCGGCAGCGCCACCTAGCGGAAGCGATCCTAGGGCGATCA	0.11	0.08	0.54
1119	GGGGACCAGGTGCCGTAAGTAAACCACTAGCACTAAATCGGAACCCTAAAGGGAGCCCCCGATTTAGAGCTTGACGGGGTTTTTTTTTTTTTTTGGCGAGGCCGGAACCGGCGAAAGCGCCACCTAGCGGAAGCGATCCTAGGGCGATCA	NaN	0.1	0.55
1120	GGGGACCAGGTGCCGTAAGTGGACGCTAAGCACTAAATCGGAACCCTAAAGGGAGCCCCCGATTTAGAGCTTGACGGGGTTTTTTTTTTTTTTTGGGCCGGAACCGGCGGAAGAAAGCGCCACCTAGCGGAAGCGATCCTAGGGCGATCA	0.18	0.11	0.52
1121	GGGGACCAGGTGCCGTAAGCGAGCCTCAAGCACTAAATCGGAACCCTAAAGGGAGCCCCCGATTTGCCGGAACCGGCGGTTTTTTTTTTTTTTTGGCGAGAAAGGAAGGGAAGAAAGCGCCACCTAGCGGAAGCGATCCTAGGGCGATCA	0.29	0.1	0.41
1122	GGGGACCAGGTGCCGTAAGCACGACTGGGGCACTAAATCGGAACCCTAAAGGGAGCCCCCGGCCGGAACCGGCACGGGGTTTTTTTTTTTTTTTGGCGAGAAAGGAAGGGAAGAAAGCGCCACCTAGCGGAAGCGATCCTAGGGCGATCA	NaN	0.46	0.81
1123	GGGGACCAGGTGCCGTAAGGCCTTACTGCGCACTAAATCGGAACCCTAAAGGGAGCCGGAACCGGCGAGCTTGACGGGGTTTTTTTTTTTTTTTGGCGAGAAAGGAAGGGAAGAAAGCGCCACCTAGCGGAAGCGATCCTAGGGCGATCA	0.27	0.08	0.72
1124	GGGGACCAGGTGCCGTAAGGCATGCAACAGCACTAAATCGGAACCCTAAAGGCCGGAACCGGCTTAGAGCTTGACGGGGTTTTTTTTTTTTTTTGGCGAGAAAGGAAGGGAAGAAAGCGCCACCTAGCGGAAGCGATCCTAGGGCGATCA	0.41	0.78	0.72
1125	GGGGACCAGGTGCCGTAAGTCTAATGAACGCACTAAATCGGAACCCTGCCGGAACCGGCCGATTTAGAGCTTGACGGGGTTTTTTTTTTTTTTTGGCGAGAAAGGAAGGGAAGAAAGCGCCACCTAGCGGAAGCGATCCTAGGGCGATCA	0.11	0.13	0.52
1126	GGGGACCAGGTGCCGTAAGATCAGTGGTCGCACTAAATCGGCCGGAACCGGCGAGCCCCCGATTTAGAGCTTGACGGGGTTTTTTTTTTTTTTTGGCGAGAAAGGAAGGGAAGAAAGCGCCACCTAGCGGAAGCGATCCTAGGGCGATCA	0.18	0.1	0.67
1127	GGGGACCAGGTGCCGTAAGAAGAGTGTCCGCACGCCGGAACCGGCCTAAAGGGAGCCCCCGATTTAGAGCTTGACGGGGTTTTTTTTTTTTTTTGGCGAGAAAGGAAGGGAAGAAAGCGCCACCTAGCGGAAGCGATCCTAGGGCGATCA	0.14	0.11	0.56
1128	GGGGACCAGGTGCCGTAAGCGCTTGAGGCAAGCCGGACAGGCAGCGACAGCCCTGACAGACAAGACTCTCCTAGCTGCGTTTTTTTTTTTTTTTGTCGCGTTCCTGAAACGCCGGAAGACTCTCCTCCGCACGCGATCCTAGGGCGATCA	0.15	2.84	0.82
1129	GGGGACCAGGTGCCGTAAGTAGTTCGTGAAAGCCGGACAGGCAGCGACAGCCCTGACAGACAAGACTCTCCTAGCTGCGTTTTTTTTTTTTTTTGTCGCGTTCCTCGGAAGACTCTCCTCCGACAGCCGCACGCGATCCTAGGGCGATCA	0.15	9.56	0.84
1130	GGGGACCAGGTGCCGTAAGGGGCGCATGTAAGCCGGACAGGCAGCGACAGCCCTGACAGACAAGACTCTCCTAGCTGCGTTTTTTTTTTTTTTTGTCGCGTTCGGAAGACTCTCCTCCGCCTACAGCCGCACGCGATCCTAGGGCGATCA	0.11	2.89	0.8
1131	GGGGACCAGGTGCCGTAAGAAGGAGCAGTAAGCCGGACAGGCAGCGACAGCCCTGACAGACAAGACTCTCCTAGCTGCGTTTTTTTTTTTTTTTGTCGCGGAAGACTCTCCTCCGTGTGCCTACAGCCGCACGCGATCCTAGGGCGATCA	0.1	1.83	0.85
1132	GGGGACCAGGTGCCGTAAGATGCTATCGGAAGCCGGACAGGCAGCGACAGCCCTGACAGACAAGACTCTCCTAGCTGCGTTTTTTTTTTTTTTTGCGGAAGACTCTCCTCCGAGATGTGCCTACAGCCGCACGCGATCCTAGGGCGATCA	0.11	5.2	0.94
1133	GGGGACCAGGTGCCGTAAGCTTAAGTACTAAGCCGGACAGGCAGCGACAGCCCTGACAGACGGAAGACTCTCCTCCGCGTTTTTTTTTTTTTTTGTCGCGTTCCTGAAACGCAGATGTGCCTACAGCCGCACGCGATCCTAGGGCGATCA	0.15	2.41	0.84
1134	GGGGACCAGGTGCCGTAAGTGACCTGCGAAAGCCGGACAGGCAGCGACAGCCCTGACGGAAGACTCTCCTCCGGCTGCGTTTTTTTTTTTTTTTGTCGCGTTCCTGAAACGCAGATGTGCCTACAGCCGCACGCGATCCTAGGGCGATCA	0.14	2.1	0.78
1135	GGGGACCAGGTGCCGTAAGGTACTAGAATAAGCCGGACAGGCAGCGACACGGAAGACTCTCCTCCGTCTCCTAGCTGCGTTTTTTTTTTTTTTTGTCGCGTTCCTGAAACGCAGATGTGCCTACAGCCGCACGCGATCCTAGGGCGATCA	0.15	1.49	0.85
1136	GGGGACCAGGTGCCGTAAGGGCTCGAGTTAAGCCGGACAGGCAGCGCGGAAGACTCTCCTCCGGACTCTCCTAGCTGCGTTTTTTTTTTTTTTTGTCGCGTTCCTGAAACGCAGATGTGCCTACAGCCGCACGCGATCCTAGGGCGATCA	0.16	4.43	0.89
1137	GGGGACCAGGTGCCGTAAGCGACAAGACGAAGCCGGACAGGCCGGAAGACTCTCCTCCGACAAGACTCTCCTAGCTGCGTTTTTTTTTTTTTTTGTCGCGTTCCTGAAACGCAGATGTGCCTACAGCCGCACGCGATCCTAGGGCGATCA	0.17	6.68	0.75
1138	GGGGACCAGGTGCCGTAAGTGCAAACGATAAGCCGCGGAAGACTCTCCTCCGCTGACAGACAAGACTCTCCTAGCTGCGTTTTTTTTTTTTTTTGTCGCGTTCCTGAAACGCAGATGTGCCTACAGCCGCACGCGATCCTAGGGCGATCA	0.13	1.57	0.74
1139	GGGGACCAGGTGCCGTAAGGAGGATCACTAAGCCGGACAGGCAGCGACAGCCCTGACAGACAAGACTCTCCTAGCTGCGTTTTTTTTTTTTTTTGTCGCGTTCCTGAAACGCAGATGTGCATGACTCATCACGCGATCCTAGGGCGATCA	2.45	0.08	0.81
1140	GGGGACCAGGTGCCGTAAGTCAGCCTTGTAAGCCGGACAGGCAGCGACAGCCCTGACAGACAAGACTCTCCTAGCTGCGTTTTTTTTTTTTTTTGTCGCGTTCCTGAAACGCAATGACTCATACAGCCGCACGCGATCCTAGGGCGATCA	2.2	0.07	0.81
1141	GGGGACCAGGTGCCGTAAGTCGCTTAGAAAAGCCGGACAGGCAGCGACAGCCCTGACAGACAAGACTCTCCTAGCTGCGTTTTTTTTTTTTTTTGTCGCGTTCCTGAAACATGACTCATCCTACAGCCGCACGCGATCCTAGGGCGATCA	2.74	0.06	0.84
1142	GGGGACCAGGTGCCGTAAGCCACCAAATTAAGCCGGACAGGCAGCGACAGCCCTGACAGACAAGACTCTCCTAGCTGCGTTTTTTTTTTTTTTTGTCGCGTTCCTGATGACTCATTGTGCCTACAGCCGCACGCGATCCTAGGGCGATCA	1.84	0.08	0.74
1143	GGGGACCAGGTGCCGTAAGGGGTGACCTCAAGCCGGACAGGCAGCGACAGCCCTGACAGACAAGACTCTCCTAGCTGCGTTTTTTTTTTTTTTTGTCGCGTTCATGACTCATAGATGTGCCTACAGCCGCACGCGATCCTAGGGCGATCA	1.39	0.07	0.81
1144	GGGGACCAGGTGCCGTAAGTCCGACTTTAAAGCCGGACAGGCAGCGACAGCCCTGACAGACAAGACTCTCCTAGCTGCGTTTTTTTTTTTTTTTGTCGCATGACTCATACGCAGATGTGCCTACAGCCGCACGCGATCCTAGGGCGATCA	1.83	0.05	0.87
1145	GGGGACCAGGTGCCGTAAGATAGCATAGTAAGCCGGACAGGCAGCGACAGCCCTGACAGACAAGACTCTCCTAGCTGCGTTTTTTTTTTTTTTTGTATGACTCATGAAACGCAGATGTGCCTACAGCCGCACGCGATCCTAGGGCGATCA	1.68	0.05	0.91
1146	GGGGACCAGGTGCCGTAAGAGTTTGCTCCAAGCCGGACAGGCAGCGACAGCCCTGACAGACAAGACTCATGACTCATCGTTTTTTTTTTTTTTTGTCGCGTTCCTGAAACGCAGATGTGCCTACAGCCGCACGCGATCCTAGGGCGATCA	1.85	0.06	0.77
1147	GGGGACCAGGTGCCGTAAGGTATCTTTTGAAGCCGGACAGGCAGCGACAGCCCTGACAGACAAGATGACTCATGCTGCGTTTTTTTTTTTTTTTGTCGCGTTCCTGAAACGCAGATGTGCCTACAGCCGCACGCGATCCTAGGGCGATCA	1.77	0.05	0.8
1148	GGGGACCAGGTGCCGTAAGTCATTCGGCGAAGCCGGACAGGCAGCGACAGCCCTGACATGACTCATTCTCCTAGCTGCGTTTTTTTTTTTTTTTGTCGCGTTCCTGAAACGCAGATGTGCCTACAGCCGCACGCGATCCTAGGGCGATCA	1.2	0.06	0.78
1149	GGGGACCAGGTGCCGTAAGTGCGAGTCAGAAGCCGGACAGGCAGCGACAGCCCTATGACTCATGACTCTCCTAGCTGCGTTTTTTTTTTTTTTTGTCGCGTTCCTGAAACGCAGATGTGCCTACAGCCGCACGCGATCCTAGGGCGATCA	1.73	0.07	0.8
1150	GGGGACCAGGTGCCGTAAGATGGTAGCCAAAGCCGGACAGGCAGCGACAGATGACTCATACAAGACTCTCCTAGCTGCGTTTTTTTTTTTTTTTGTCGCGTTCCTGAAACGCAGATGTGCCTACAGCCGCACGCGATCCTAGGGCGATCA	2.73	0.07	0.87
1151	GGGGACCAGGTGCCGTAAGCCTACAGGACAAGCCGGACAGGCAATGACTCATCTGACAGACAAGACTCTCCTAGCTGCGTTTTTTTTTTTTTTTGTCGCGTTCCTGAAACGCAGATGTGCCTACAGCCGCACGCGATCCTAGGGCGATCA	1.58	0.05	0.8
1152	GGGGACCAGGTGCCGTAAGCTCTATTTGAAAGCCGGATGACTCATGACAGCCCTGACAGACAAGACTCTCCTAGCTGCGTTTTTTTTTTTTTTTGTCGCGTTCCTGAAACGCAGATGTGCCTACAGCCGCACGCGATCCTAGGGCGATCA	1.13	0.08	0.82
1153	GGGGACCAGGTGCCGTAAGATCTCCACCGAAGCCGGACAGGCAGCGACAGCCCTGACAGACAAGACTCTCCTAGCTGCGTTTTTTTTTTTTTTTGTCGCGTTCCTGAAACGCAGATGGCCGGAACCGGCCACGCGATCCTAGGGCGATCA	0.15	0.13	0.88
1154	GGGGACCAGGTGCCGTAAGAAGGCCTAGAAAGCCGGACAGGCAGCGACAGCCCTGACAGACAAGACTCTCCTAGCTGCGTTTTTTTTTTTTTTTGTCGCGTTCCTGAAACGCCGGAACCGGCACAGCCGCACGCGATCCTAGGGCGATCA	0.12	0.1	0.86
1155	GGGGACCAGGTGCCGTAAGTATGATTTTCAAGCCGGACAGGCAGCGACAGCCCTGACAGACAAGACTCTCCTAGCTGCGTTTTTTTTTTTTTTTGTCGCGTTCCTGAGCCGGAACCGGCCCTACAGCCGCACGCGATCCTAGGGCGATCA	0.13	0.06	0.73
1156	GGGGACCAGGTGCCGTAAGGACGTCACTAAAGCCGGACAGGCAGCGACAGCCCTGACAGACAAGACTCTCCTAGCTGCGTTTTTTTTTTTTTTTGTCGCGTTCGCCGGAACCGGCTGTGCCTACAGCCGCACGCGATCCTAGGGCGATCA	0.16	0.07	0.76
1157	GGGGACCAGGTGCCGTAAGGACCGAGAACAAGCCGGACAGGCAGCGACAGCCCTGACAGACAAGACTCTCCTAGCTGCGTTTTTTTTTTTTTTTGTCGCGGCCGGAACCGGCAGATGTGCCTACAGCCGCACGCGATCCTAGGGCGATCA	0.15	0.06	0.83
1158	GGGGACCAGGTGCCGTAAGACCTCGCTAGAAGCCGGACAGGCAGCGACAGCCCTGACAGACAAGACTCTCCTAGCTGCGTTTTTTTTTTTTTTTGTGCCGGAACCGGCACGCAGATGTGCCTACAGCCGCACGCGATCCTAGGGCGATCA	0.13	0.06	0.81
1159	GGGGACCAGGTGCCGTAAGTTGACGAGGAAAGCCGGACAGGCAGCGACAGCCCTGACAGACAAGAGCCGGAACCGGCCGTTTTTTTTTTTTTTTGTCGCGTTCCTGAAACGCAGATGTGCCTACAGCCGCACGCGATCCTAGGGCGATCA	0.18	0.08	0.72
1160	GGGGACCAGGTGCCGTAAGAGCACGCTGAAAGCCGGACAGGCAGCGACAGCCCTGACAGACGCCGGAACCGGCGCTGCGTTTTTTTTTTTTTTTGTCGCGTTCCTGAAACGCAGATGTGCCTACAGCCGCACGCGATCCTAGGGCGATCA	0.24	0.05	0.85
1161	GGGGACCAGGTGCCGTAAGAGGTGAGTGGAAGCCGGACAGGCAGCGACAGCCCTGCCGGAACCGGCTCTCCTAGCTGCGTTTTTTTTTTTTTTTGTCGCGTTCCTGAAACGCAGATGTGCCTACAGCCGCACGCGATCCTAGGGCGATCA	0.25	0.06	0.86
1162	GGGGACCAGGTGCCGTAAGAAGTAAGAACAAGCCGGACAGGCAGCGACAGCGCCGGAACCGGCGACTCTCCTAGCTGCGTTTTTTTTTTTTTTTGTCGCGTTCCTGAAACGCAGATGTGCCTACAGCCGCACGCGATCCTAGGGCGATCA	0.64	0.05	0.84
1163	GGGGACCAGGTGCCGTAAGTGCTTACTGTAAGCCGGACAGGCAGCGAGCCGGAACCGGCACAAGACTCTCCTAGCTGCGTTTTTTTTTTTTTTTGTCGCGTTCCTGAAACGCAGATGTGCCTACAGCCGCACGCGATCCTAGGGCGATCA	0.16	0.08	0.8
1164	GGGGACCAGGTGCCGTAAGTGGTTCAAGGAAGCCGGACAGGCCGGAACCGGCCTGACAGACAAGACTCTCCTAGCTGCGTTTTTTTTTTTTTTTGTCGCGTTCCTGAAACGCAGATGTGCCTACAGCCGCACGCGATCCTAGGGCGATCA	0.12	0.07	0.79
1165	GGGGACCAGGTGCCGTAAGTAACGCGAGTAAGCGCCGGAACCGGCGACAGCCCTGACAGACAAGACTCTCCTAGCTGCGTTTTTTTTTTTTTTTGTCGCGTTCCTGAAACGCAGATGTGCCTACAGCCGCACGCGATCCTAGGGCGATCA	0.13	0.05	0.82
1166	GGGGACCAGGTGCCGTAAGTAACAAGCAAGCACTAAATCGGAACCCTAAAGGGAGCCCCCGATTTAGAGCTTGACGGGGCGGAAGACTCTCCTCCGCGAGAAAGGAAGGGAAGAAAGCGCCACCTAGCGGAAGCGATCCTAGGGCGATCA	NaN	1.9	0.84
1167	GGGGACCAGGTGCCGTAAGCCGTCCGGGAGCACTAAATCGGAACCCTAAAGGGAGCCCCCGATTTAGAGCTTGACGGGGCGGAAGACTCTCCTCCGCGAGAAAGGAAGGGAAGAAATTTTTTTTTTTTTTTAGCGATCCTAGGGCGATCA	0.14	2.02	0.69
1168	GGGGACCAGGTGCCGTAAGCCAGTGCACGGCACTAAATCGGAACCCTAAAGGGTTTTTTTTTTTTTTTGCTTGACGGGGCGGAAGACTCTCCTCCGCGAGAAAGGAAGGGAAGAAAGCGCCACCTAGCGGAAGCGATCCTAGGGCGATCA	0.4	2.78	0.69
1169	GGGGACCAGGTGCCGTAAGAGTGTCGGACGCACTAAATCGGAACCCTAAAGGGAGCCCCCGATTTAGAGCTTGACGCGGAAGACTCTCCTCCGTGGCGAGAAAGGAAGGGAAGAAAGCGCCACCTAGCGGAAGCGATCCTAGGGCGATCA	0.45	2.83	1.14
1170	GGGGACCAGGTGCCGTAAGCCAGCGGCGTGCACTAAATCGGAACCCTAAAGGGAGCCCCCGATTTAGAGCTTGACGCGGAAGACTCTCCTCCGTGGCGAGAAAGGAAGGGAAGAAATTTTTTTTTTTTTTTAGCGATCCTAGGGCGATCA	NaN	2.51	0.98
1171	GGGGACCAGGTGCCGTAAGTGTAGTGGTAGCACTAAATCGGAACCCTAAAGGGTTTTTTTTTTTTTTTGCTTGACGCGGAAGACTCTCCTCCGTGGCGAGAAAGGAAGGGAAGAAAGCGCCACCTAGCGGAAGCGATCCTAGGGCGATCA	0.15	3.24	0.99
1172	GGGGACCAGGTGCCGTAAGCAGCAGGATTGCACTAAATCGGAACCCTAAAGGGAGCCCCCGATTTAGAGCTTCGGAAGACTCTCCTCCGAACGTGGCGAGAAAGGAAGGGAAGAAAGCGCCACCTAGCGGAAGCGATCCTAGGGCGATCA	0.29	17.41	1.28
1173	GGGGACCAGGTGCCGTAAGGTATTTCAGCGCACTAAATCGGAACCCTAAAGGGAGCCCCCGATTTAGAGCTTCGGAAGACTCTCCTCCGAACGTGGCGAGAAAGGAAGGGAAGAAATTTTTTTTTTTTTTTAGCGATCCTAGGGCGATCA	0.33	13.83	0.96
1174	GGGGACCAGGTGCCGTAAGTGCTGCCGAGGCACTAAATCGGAACCCTAAAGGGTTTTTTTTTTTTTTTGCTTCGGAAGACTCTCCTCCGAACGTGGCGAGAAAGGAAGGGAAGAAAGCGCCACCTAGCGGAAGCGATCCTAGGGCGATCA	0.26	17.33	0.77
1175	GGGGACCAGGTGCCGTAAGGGTCTGCTTCGCACTAAATCGGAACCCTAAAGGGAGCCCCCGATTTAGAGCTTGACGGGGAAAGCCGGATGACTCATCGAGAAAGGAAGGGAAGAAAGCGCCACCTAGCGGAAGCGATCCTAGGGCGATCA	NaN	0.07	1.07
1176	GGGGACCAGGTGCCGTAAGTGACCTATGCGCACTAAATCGGAACCCTAAAGGGAGCCCCCGATTTAGAGCTTGACGGGGAAAGCCGGATGACTCATCGAGAAAGGAAGGGAAGAAATTTTTTTTTTTTTTTAGCGATCCTAGGGCGATCA	NaN	0.1	0.83
1177	GGGGACCAGGTGCCGTAAGGCCGACAGTCGCACTAAATCGGAACCCTAAAGGGTTTTTTTTTTTTTTTGCTTGACGGGGAAAGCCGGATGACTCATCGAGAAAGGAAGGGAAGAAAGCGCCACCTAGCGGAAGCGATCCTAGGGCGATCA	2.23	0.08	0.86
1178	GGGGACCAGGTGCCGTAAGCGCTAGGATCGCACTAAATCGGAACCCTAAAGGGAGCCCCCGATTTAGAGCTTGACGGGGAAAGCATGACTCATTGGCGAGAAAGGAAGGGAAGAAAGCGCCACCTAGCGGAAGCGATCCTAGGGCGATCA	NaN	0.07	1.03
1179	GGGGACCAGGTGCCGTAAGCCCGAAGGAGGCACTAAATCGGAACCCTAAAGGGAGCCCCCGATTTAGAGCTTGACGGGGAAAGCATGACTCATTGGCGAGAAAGGAAGGGAAGAAATTTTTTTTTTTTTTTAGCGATCCTAGGGCGATCA	NaN	0.14	0.93
1180	GGGGACCAGGTGCCGTAAGGGACCAGACCGCACTAAATCGGAACCCTAAAGGGTTTTTTTTTTTTTTTGCTTGACGGGGAAAGCATGACTCATTGGCGAGAAAGGAAGGGAAGAAAGCGCCACCTAGCGGAAGCGATCCTAGGGCGATCA	0.89	0.15	0.77
1181	GGGGACCAGGTGCCGTAAGGCATATGCTCGCACTAAATCGGAACCCTAAAGGGAGCCCCCGATTTAGAGCTTGACGGGGAATGACTCATAACGTGGCGAGAAAGGAAGGGAAGAAAGCGCCACCTAGCGGAAGCGATCCTAGGGCGATCA	1.47	0.18	1.07
1182	GGGGACCAGGTGCCGTAAGGATTCAGTCAGCACTAAATCGGAACCCTAAAGGGAGCCCCCGATTTAGAGCTTGACGGGGAATGACTCATAACGTGGCGAGAAAGGAAGGGAAGAAATTTTTTTTTTTTTTTAGCGATCCTAGGGCGATCA	1.13	0.14	0.92
1183	GGGGACCAGGTGCCGTAAGAATCAATAGCGCACTAAATCGGAACCCTAAAGGGTTTTTTTTTTTTTTTGCTTGACGGGGAATGACTCATAACGTGGCGAGAAAGGAAGGGAAGAAAGCGCCACCTAGCGGAAGCGATCCTAGGGCGATCA	NaN	NaN	0.93
1184	GGGGACCAGGTGCCGTAAGAAGAAGCCACGCACTAAATCGGAACCCTAAAGGGAGCCCCCGATTTAGAGCTTGACGGGGAAAGCGCCGGAACCGGCCGAGAAAGGAAGGGAAGAAAGCGCCACCTAGCGGAAGCGATCCTAGGGCGATCA	NaN	0.22	1.01
1185	GGGGACCAGGTGCCGTAAGCGTGACGGCGGCACTAAATCGGAACCCTAAAGGGAGCCCCCGATTTAGAGCTTGACGGGGAAAGCGCCGGAACCGGCCGAGAAAGGAAGGGAAGAAATTTTTTTTTTTTTTTAGCGATCCTAGGGCGATCA	0.1	0.11	1
1186	GGGGACCAGGTGCCGTAAGGACAGTCGCCGCACTAAATCGGAACCCTAAAGGGTTTTTTTTTTTTTTTGCTTGACGGGGAAAGCGCCGGAACCGGCCGAGAAAGGAAGGGAAGAAAGCGCCACCTAGCGGAAGCGATCCTAGGGCGATCA	0.49	0.25	0.96
1187	GGGGACCAGGTGCCGTAAGGCCGTGTTGTGCACTAAATCGGAACCCTAAAGGGAGCCCCCGATTTAGAGCTTGACGGGGAAGCCGGAACCGGCTGGCGAGAAAGGAAGGGAAGAAAGCGCCACCTAGCGGAAGCGATCCTAGGGCGATCA	NaN	0.07	1.37
1188	GGGGACCAGGTGCCGTAAGACTCTAACCTGCACTAAATCGGAACCCTAAAGGGAGCCCCCGATTTAGAGCTTGACGGGGAAGCCGGAACCGGCTGGCGAGAAAGGAAGGGAAGAAATTTTTTTTTTTTTTTAGCGATCCTAGGGCGATCA	0.16	0.11	1.08
1189	GGGGACCAGGTGCCGTAAGAACGACTCAAGCACTAAATCGGAACCCTAAAGGGTTTTTTTTTTTTTTTGCTTGACGGGGAAGCCGGAACCGGCTGGCGAGAAAGGAAGGGAAGAAAGCGCCACCTAGCGGAAGCGATCCTAGGGCGATCA	0.3	0.09	0.87
1190	GGGGACCAGGTGCCGTAAGGAACAGTCTCGCACTAAATCGGAACCCTAAAGGGAGCCCCCGATTTAGAGCTTGACGGGCCGGAACCGGCAACGTGGCGAGAAAGGAAGGGAAGAAAGCGCCACCTAGCGGAAGCGATCCTAGGGCGATCA	NaN	0.14	1.03
1191	GGGGACCAGGTGCCGTAAGTAAAGGTCTCGCACTAAATCGGAACCCTAAAGGGAGCCCCCGATTTAGAGCTTGACGGGCCGGAACCGGCAACGTGGCGAGAAAGGAAGGGAAGAAATTTTTTTTTTTTTTTAGCGATCCTAGGGCGATCA	0.2	0.07	0.92
1192	GGGGACCAGGTGCCGTAAGCTGAGCCTACGCACTAAATCGGAACCCTAAAGGGTTTTTTTTTTTTTTTGCTTGACGGGCCGGAACCGGCAACGTGGCGAGAAAGGAAGGGAAGAAAGCGCCACCTAGCGGAAGCGATCCTAGGGCGATCA	0.28	0.11	0.87
1193	GGGGACCAGGTGCCGTAAGCAGCGTCACTAAGCCGGACAGGCAGCGACAGCCCTGACAGACAAGACTCTCCTAGCTGCGCGGAAGACTCTCCTCCGCGCGTTCCTGAAACGCAGATGTGCCTACAGCCGCACGCGATCCTAGGGCGATCA	0.37	1.64	1.36
1194	GGGGACCAGGTGCCGTAAGTGGCCACCGGAAGCCGGACAGGCAGCGACAGCCCTGACAGACAAGACTCTCCTAGCTGCGCGGAAGACTCTCCTCCGCGCGTTCCTGAAACGCAGATTTTTTTTTTTTTTTTCGCGATCCTAGGGCGATCA	0.24	2.03	0.98
1195	GGGGACCAGGTGCCGTAAGGATTCTCGCAAAGCCGGACAGGCAGCGACAGCCCTTTTTTTTTTTTTTTTCCTAGCTGCGCGGAAGACTCTCCTCCGCGCGTTCCTGAAACGCAGATGTGCCTACAGCCGCACGCGATCCTAGGGCGATCA	0.31	2.19	0.94
1196	GGGGACCAGGTGCCGTAAGTAACAACGGTAAGCCGGACAGGCAGCGACAGCCCTGACAGACAAGACTCTCCTAGCTCGGAAGACTCTCCTCCGGGTCGCGTTCCTGAAACGCAGATGTGCCTACAGCCGCACGCGATCCTAGGGCGATCA	0.15	7.04	1.18
1197	GGGGACCAGGTGCCGTAAGTCTGTTTCGAAAGCCGGACAGGCAGCGACAGCCCTGACAGACAAGACTCTCCTAGCTCGGAAGACTCTCCTCCGGGTCGCGTTCCTGAAACGCAGATTTTTTTTTTTTTTTTCGCGATCCTAGGGCGATCA	0.22	8.29	1.01
1198	GGGGACCAGGTGCCGTAAGACGAAACAAGAAGCCGGACAGGCAGCGACAGCCCTTTTTTTTTTTTTTTTCCTAGCTCGGAAGACTCTCCTCCGGGTCGCGTTCCTGAAACGCAGATGTGCCTACAGCCGCACGCGATCCTAGGGCGATCA	0.23	8.82	0.84
1199	GGGGACCAGGTGCCGTAAGTTTCATAGCCAAGCCGGACAGGCAGCGACAGCCCTGACAGACAAGACTCTCCTCGGAAGACTCTCCTCCGCACCGGTCGCGTTCCTGAAACGCAGATGTGCCTACAGCCGCACGCGATCCTAGGGCGATCA	0.21	4.14	1.23
1200	GGGGACCAGGTGCCGTAAGAGCCGTCAAGAAGCCGGACAGGCAGCGACAGCCCTGACAGACAAGACTCTCCTCGGAAGACTCTCCTCCGCACCGGTCGCGTTCCTGAAACGCAGATTTTTTTTTTTTTTTTCGCGATCCTAGGGCGATCA	0.25	4.65	0.99
1201	GGGGACCAGGTGCCGTAAGTCGTAGCGCAAAGCCGGACAGGCAGCGACAGCCCTTTTTTTTTTTTTTTTCCTCGGAAGACTCTCCTCCGCACCGGTCGCGTTCCTGAAACGCAGATGTGCCTACAGCCGCACGCGATCCTAGGGCGATCA	0.18	4.99	0.8
1202	GGGGACCAGGTGCCGTAAGTGGATATGAGAAGCCGGACAGGCAGCGACAGCCCTGACAGACAAGACTCTCCTAGCTGCGTCCTCGTCATGACTCATCGCGTTCCTGAAACGCAGATGTGCCTACAGCCGCACGCGATCCTAGGGCGATCA	1.66	0.07	1.18
1203	GGGGACCAGGTGCCGTAAGCCTGAACGGCAAGCCGGACAGGCAGCGACAGCCCTGACAGACAAGACTCTCCTAGCTGCGTCCTCGTCATGACTCATCGCGTTCCTGAAACGCAGATTTTTTTTTTTTTTTTCGCGATCCTAGGGCGATCA	1.44	0.06	1.03
1204	GGGGACCAGGTGCCGTAAGCGTAATTCAGAAGCCGGACAGGCAGCGACAGCCCTTTTTTTTTTTTTTTTCCTAGCTGCGTCCTCGTCATGACTCATCGCGTTCCTGAAACGCAGATGTGCCTACAGCCGCACGCGATCCTAGGGCGATCA	1.77	0.09	0.95
1205	GGGGACCAGGTGCCGTAAGAAGATCGGACAAGCCGGACAGGCAGCGACAGCCCTGACAGACAAGACTCTCCTAGCTGCGTCCTCATGACTCATGGTCGCGTTCCTGAAACGCAGATGTGCCTACAGCCGCACGCGATCCTAGGGCGATCA	0.65	0.1	1.25
1206	GGGGACCAGGTGCCGTAAGTGTGACCGACAAGCCGGACAGGCAGCGACAGCCCTGACAGACAAGACTCTCCTAGCTGCGTCCTCATGACTCATGGTCGCGTTCCTGAAACGCAGATTTTTTTTTTTTTTTTCGCGATCCTAGGGCGATCA	0.51	0.08	0.94
1207	GGGGACCAGGTGCCGTAAGTGTCTTGGACAAGCCGGACAGGCAGCGACAGCCCTTTTTTTTTTTTTTTTCCTAGCTGCGTCCTCATGACTCATGGTCGCGTTCCTGAAACGCAGATGTGCCTACAGCCGCACGCGATCCTAGGGCGATCA	0.71	0.05	0.85
1208	GGGGACCAGGTGCCGTAAGCGCACGACGGAAGCCGGACAGGCAGCGACAGCCCTGACAGACAAGACTCTCCTAGCTGCGTATGACTCATCACCGGTCGCGTTCCTGAAACGCAGATGTGCCTACAGCCGCACGCGATCCTAGGGCGATCA	4.93	0.07	1.2
1209	GGGGACCAGGTGCCGTAAGCGACCGCTTTAAGCCGGACAGGCAGCGACAGCCCTGACAGACAAGACTCTCCTAGCTGCGTATGACTCATCACCGGTCGCGTTCCTGAAACGCAGATTTTTTTTTTTTTTTTCGCGATCCTAGGGCGATCA	3.88	0.07	0.99
1210	GGGGACCAGGTGCCGTAAGTGTCTCGTGCAAGCCGGACAGGCAGCGACAGCCCTTTTTTTTTTTTTTTTCCTAGCTGCGTATGACTCATCACCGGTCGCGTTCCTGAAACGCAGATGTGCCTACAGCCGCACGCGATCCTAGGGCGATCA	4.22	0.05	0.86
1211	GGGGACCAGGTGCCGTAAGGTTAGCGTCTAAGCCGGACAGGCAGCGACAGCCCTGACAGACAAGACTCTCCTAGCTGCGTCCTCGCCGGAACCGGCCGCGTTCCTGAAACGCAGATGTGCCTACAGCCGCACGCGATCCTAGGGCGATCA	0.21	0.07	1.11
1212	GGGGACCAGGTGCCGTAAGTTAGACACGTAAGCCGGACAGGCAGCGACAGCCCTGACAGACAAGACTCTCCTAGCTGCGTCCTCGCCGGAACCGGCCGCGTTCCTGAAACGCAGATTTTTTTTTTTTTTTTCGCGATCCTAGGGCGATCA	0.2	0.08	1.09
1213	GGGGACCAGGTGCCGTAAGGTTAATTTCTAAGCCGGACAGGCAGCGACAGCCCTTTTTTTTTTTTTTTTCCTAGCTGCGTCCTCGCCGGAACCGGCCGCGTTCCTGAAACGCAGATGTGCCTACAGCCGCACGCGATCCTAGGGCGATCA	0.29	0.06	0.92
1214	GGGGACCAGGTGCCGTAAGTTCAGTGTACAAGCCGGACAGGCAGCGACAGCCCTGACAGACAAGACTCTCCTAGCTGCGTCGCCGGAACCGGCGGTCGCGTTCCTGAAACGCAGATGTGCCTACAGCCGCACGCGATCCTAGGGCGATCA	0.28	0.04	1.24
1215	GGGGACCAGGTGCCGTAAGGGCGCTGAGTAAGCCGGACAGGCAGCGACAGCCCTGACAGACAAGACTCTCCTAGCTGCGTCGCCGGAACCGGCGGTCGCGTTCCTGAAACGCAGATTTTTTTTTTTTTTTTCGCGATCCTAGGGCGATCA	0.29	0.06	0.93
1216	GGGGACCAGGTGCCGTAAGGAATCGTAGTAAGCCGGACAGGCAGCGACAGCCCTTTTTTTTTTTTTTTTCCTAGCTGCGTCGCCGGAACCGGCGGTCGCGTTCCTGAAACGCAGATGTGCCTACAGCCGCACGCGATCCTAGGGCGATCA	0.33	0.07	0.98
1217	GGGGACCAGGTGCCGTAAGCACACAGGTCAAGCCGGACAGGCAGCGACAGCCCTGACAGACAAGACTCTCCTAGCTGGCCGGAACCGGCCACCGGTCGCGTTCCTGAAACGCAGATGTGCCTACAGCCGCACGCGATCCTAGGGCGATCA	0.29	0.05	1.25
1218	GGGGACCAGGTGCCGTAAGGGTGTTTCTAAAGCCGGACAGGCAGCGACAGCCCTGACAGACAAGACTCTCCTAGCTGGCCGGAACCGGCCACCGGTCGCGTTCCTGAAACGCAGATTTTTTTTTTTTTTTTCGCGATCCTAGGGCGATCA	0.42	0.06	0.92
1219	GGGGACCAGGTGCCGTAAGCTTAAAGTTTAAGCCGGACAGGCAGCGACAGCCCTTTTTTTTTTTTTTTTCCTAGCTGGCCGGAACCGGCCACCGGTCGCGTTCCTGAAACGCAGATGTGCCTACAGCCGCACGCGATCCTAGGGCGATCA	0.3	0.06	0.78
1220	GGGGACCAGGTGCCGTAAGCGGTCTGCCCGTTTTTTTTTTTTTTTCTAAAGGGAGCCCCCGATTTAGAGCTTGACGGGGAAAGCCGGCGAACGTGGCGAGAAAGGAAGGGAACGGAAGACTCTCCTCCGGAAGCGATCCTAGGGCGATCA	0.14	3.78	0.96
1221	GGGGACCAGGTGCCGTAAGTACCGACTATGTTTTTTTTTTTTTTTCTAAAGGGAGCCCCCGATTTAGAGCTTGACGGGGAAAGCCGGCGAACGTGGCGCGGAAGACTCTCCTCCGAGCGCCACCTAGCGGAAGCGATCCTAGGGCGATCA	0.08	6.72	1.06
1222	GGGGACCAGGTGCCGTAAGTCAATAGGAGGTTTTTTTTTTTTTTTCTAAAGGGAGCCCCCGATTTAGAGCTTGACGGGGAAAGCCGGCGAACGGAAGACTCTCCTCCGGGAAGAAAGCGCCACCTAGCGGAAGCGATCCTAGGGCGATCA	NaN	NaN	NaN
1223	GGGGACCAGGTGCCGTAAGCGTAGACCCTGTTTTTTTTTTTTTTTCTAAAGGGAGCCCCCGATTTAGAGCTTGACGGGGAAAGCCGGAAGACTCTCCTCCGAAGGAAGGGAAGAAAGCGCCACCTAGCGGAAGCGATCCTAGGGCGATCA	0.08	12.41	0.79
1224	GGGGACCAGGTGCCGTAAGCCATGAGTCCGTTTTTTTTTTTTTTTCTAAAGGGAGCCCCCGATTTAGAGCTTGACGGCGGAAGACTCTCCTCCGGGCGAGAAAGGAAGGGAAGAAAGCGCCACCTAGCGGAAGCGATCCTAGGGCGATCA	0.18	5.64	0.91
1225	GGGGACCAGGTGCCGTAAGTCCGGTGTCCGTTTTTTTTTTTTTTTCTAAAGGGAGCCCCCGATTTAGAGCCGGAAGACTCTCCTCCGCGAACGTGGCGAGAAAGGAAGGGAAGAAAGCGCCACCTAGCGGAAGCGATCCTAGGGCGATCA	NaN	5.95	1.19
1226	GGGGACCAGGTGCCGTAAGAAACGACGCTGTTTTTTTTTTTTTTTCTAAAGGGAGCCGGAAGACTCTCCTCCGACGGGGAAAGCCGGCGAACGTGGCGAGAAAGGAAGGGAAGAAAGCGCCACCTAGCGGAAGCGATCCTAGGGCGATCA	0.08	9.09	0.96
1227	GGGGACCAGGTGCCGTAAGGAAAGGTCCTGTTTTTTTTTTTTTTTCTAACGGAAGACTCTCCTCCGGAGCTTGACGGGGAAAGCCGGCGAACGTGGCGAGAAAGGAAGGGAAGAAAGCGCCACCTAGCGGAAGCGATCCTAGGGCGATCA	NaN	NaN	1
1228	GGGGACCAGGTGCCGTAAGCCGCTACCGGGTTTTTTTTTTTTTTTCTAAAGGGAGCCCCCGATTTAGAGCTTGACGGGGAAAGCCGGCGAACGTGGCGAGAAAGGAAGGGAAGAAAGCGCATGACTCATGAAGCGATCCTAGGGCGATCA	0.59	0.08	0.93
1229	GGGGACCAGGTGCCGTAAGCCCTGTCTAGGTTTTTTTTTTTTTTTCTAAAGGGAGCCCCCGATTTAGAGCTTGACGGGGAAAGCCGGCGAACGTGGCGAGAAAGGAATGACTCATAGCGCCACCTAGCGGAAGCGATCCTAGGGCGATCA	1.03	0.75	0.95
1230	GGGGACCAGGTGCCGTAAGCTATGAATGTGTTTTTTTTTTTTTTTCTAAAGGGAGCCCCCGATTTAGAGCTTGACGGGGAAAGCCGGCGAACGTGGCGAATGACTCATGGAAGAAAGCGCCACCTAGCGGAAGCGATCCTAGGGCGATCA	NaN	NaN	NaN
1231	GGGGACCAGGTGCCGTAAGCCTGCACTTCGTTTTTTTTTTTTTTTCTAAAGGGAGCCCCCGATTTAGAGCTTGACGGGGAAAGCCGGCGAACATGACTCATAAGGAAGGGAAGAAAGCGCCACCTAGCGGAAGCGATCCTAGGGCGATCA	0.7	0.08	0.94
1232	GGGGACCAGGTGCCGTAAGTCGCGACCCGGTTTTTTTTTTTTTTTCTAAAGGGAGCCCCCGATTTAGAGCTTGACGGGGAAAGCCATGACTCATGGCGAGAAAGGAAGGGAAGAAAGCGCCACCTAGCGGAAGCGATCCTAGGGCGATCA	0.48	0.18	0.84
1233	GGGGACCAGGTGCCGTAAGTAATTAGTCCGTTTTTTTTTTTTTTTCTAAAGGGAGCCCCCGATTTAGAGCTTGACGGGATGACTCATCGAACGTGGCGAGAAAGGAAGGGAAGAAAGCGCCACCTAGCGGAAGCGATCCTAGGGCGATCA	NaN	NaN	NaN
1234	GGGGACCAGGTGCCGTAAGTAGTAGCTATGTTTTTTTTTTTTTTTCTAAAGGGAGCCCCCGATTATGACTCATACGGGGAAAGCCGGCGAACGTGGCGAGAAAGGAAGGGAAGAAAGCGCCACCTAGCGGAAGCGATCCTAGGGCGATCA	NaN	NaN	0.54
1235	GGGGACCAGGTGCCGTAAGGAGACTGAGCGTTTTTTTTTTTTTTTCTAAAGGGAGCCATGACTCATGAGCTTGACGGGGAAAGCCGGCGAACGTGGCGAGAAAGGAAGGGAAGAAAGCGCCACCTAGCGGAAGCGATCCTAGGGCGATCA	NaN	NaN	1
1236	GGGGACCAGGTGCCGTAAGGCGTCGTGTTGTTTTTTTTTTTTTTTCTAAAATGACTCATCGATTTAGAGCTTGACGGGGAAAGCCGGCGAACGTGGCGAGAAAGGAAGGGAAGAAAGCGCCACCTAGCGGAAGCGATCCTAGGGCGATCA	1.22	0.08	1.05
1237	GGGGACCAGGTGCCGTAAGCAGTAGAAATGTTTTTTTTTTTTTTTCTATGACTCATCCCCGATTTAGAGCTTGACGGGGAAAGCCGGCGAACGTGGCGAGAAAGGAAGGGAAGAAAGCGCCACCTAGCGGAAGCGATCCTAGGGCGATCA	NaN	NaN	NaN
1238	GGGGACCAGGTGCCGTAAGCCCACTTTAGGTTTTTTTTTTTTTTTCTAAAGGGAGCCCCCGATTTAGAGCTTGACGGGGAAAGCCGGCGAACGTGGCGAGAAAGGAAGGGAAGAAAGGCCGGAACCGGCGAAGCGATCCTAGGGCGATCA	NaN	0.16	0.9
1239	GGGGACCAGGTGCCGTAAGGCCCTTGTGCGTTTTTTTTTTTTTTTCTAAAGGGAGCCCCCGATTTAGAGCTTGACGGGGAAAGCCGGCGAACGTGGCGAGAAAGCCGGAACCGGCAGCGCCACCTAGCGGAAGCGATCCTAGGGCGATCA	0.09	0.23	0.84
1240	GGGGACCAGGTGCCGTAAGGCCTGGACGGGTTTTTTTTTTTTTTTCTAAAGGGAGCCCCCGATTTAGAGCTTGACGGGGAAAGCCGGCGAACGTGGGCCGGAACCGGCGGAAGAAAGCGCCACCTAGCGGAAGCGATCCTAGGGCGATCA	0.07	0.2	0.81
1241	GGGGACCAGGTGCCGTAAGGTCGTAAGAGGTTTTTTTTTTTTTTTCTAAAGGGAGCCCCCGATTTAGAGCTTGACGGGGAAAGCCGGCGGCCGGAACCGGCAAGGAAGGGAAGAAAGCGCCACCTAGCGGAAGCGATCCTAGGGCGATCA	NaN	0.07	1.07
1242	GGGGACCAGGTGCCGTAAGCCAGTGGGTGGTTTTTTTTTTTTTTTCTAAAGGGAGCCCCCGATTTAGAGCTTGACGGGGAAAGCCGGAACCGGCGGCGAGAAAGGAAGGGAAGAAAGCGCCACCTAGCGGAAGCGATCCTAGGGCGATCA	0.13	0.11	0.73
1243	GGGGACCAGGTGCCGTAAGATTGAGCGGCGTTTTTTTTTTTTTTTCTAAAGGGAGCCCCCGATTTAGAGCTTGACGCCGGAACCGGCCGAACGTGGCGAGAAAGGAAGGGAAGAAAGCGCCACCTAGCGGAAGCGATCCTAGGGCGATCA	0.14	0.08	0.95
1244	GGGGACCAGGTGCCGTAAGCTCTGAAGTTGTTTTTTTTTTTTTTTCTAAAGGGAGCCCCCGGCCGGAACCGGCACGGGGAAAGCCGGCGAACGTGGCGAGAAAGGAAGGGAAGAAAGCGCCACCTAGCGGAAGCGATCCTAGGGCGATCA	NaN	0.74	0.94
1245	GGGGACCAGGTGCCGTAAGGCTTGAGGACGTTTTTTTTTTTTTTTCTAAAGGGAGCCGGAACCGGCGAGCTTGACGGGGAAAGCCGGCGAACGTGGCGAGAAAGGAAGGGAAGAAAGCGCCACCTAGCGGAAGCGATCCTAGGGCGATCA	0.14	0.2	1.04
1246	GGGGACCAGGTGCCGTAAGTTAAAGCTAAGTTTTTTTTTTTTTTTCTGCCGGAACCGGCCGATTTAGAGCTTGACGGGGAAAGCCGGCGAACGTGGCGAGAAAGGAAGGGAAGAAAGCGCCACCTAGCGGAAGCGATCCTAGGGCGATCA	NaN	0.18	1.07
1247	GGGGACCAGGTGCCGTAAGCCTACCGCTGATTTTTTTTTTTTTTTGACAGCCCTGACAGACAAGACTCTCCTAGCTGCGTCCTCGTCTTCACCGGTCGCGTTCCTGAAACGCCGGAAGACTCTCCTCCGCACGCGATCCTAGGGCGATCA	0.14	2.92	1.2
1248	GGGGACCAGGTGCCGTAAGGAAAGTGATTATTTTTTTTTTTTTTTGACAGCCCTGACAGACAAGACTCTCCTAGCTGCGTCCTCGTCTTCACCGGTCGCGGAAGACTCTCCTCCGTGTGCCTACAGCCGCACGCGATCCTAGGGCGATCA	0.25	1.88	1.01
1249	GGGGACCAGGTGCCGTAAGCTATGATCGAATTTTTTTTTTTTTTTGACAGCCCTGACAGACAAGACTCTCCTAGCTGCGTCCTCGTCTTCACGGAAGACTCTCCTCCGACGCAGATGTGCCTACAGCCGCACGCGATCCTAGGGCGATCA	0.14	5.59	1.2
1250	GGGGACCAGGTGCCGTAAGATGCGTGCAAATTTTTTTTTTTTTTTGACAGCCCTGACAGACAAGACTCTCCTAGCTGCGTCCTCCGGAAGACTCTCCTCCGTCCTGAAACGCAGATGTGCCTACAGCCGCACGCGATCCTAGGGCGATCA	0.22	3.09	1.26
1251	GGGGACCAGGTGCCGTAAGTCCTACCGACATTTTTTTTTTTTTTTGACAGCCCTGACAGACAAGACTCTCCTAGCTGCGGAAGACTCTCCTCCGGTCGCGTTCCTGAAACGCAGATGTGCCTACAGCCGCACGCGATCCTAGGGCGATCA	0.16	2.88	1.02
1252	GGGGACCAGGTGCCGTAAGCTAGTACAGTATTTTTTTTTTTTTTTGACAGCCCTGACAGACAAGACTCTCCGGAAGACTCTCCTCCGTTCACCGGTCGCGTTCCTGAAACGCAGATGTGCCTACAGCCGCACGCGATCCTAGGGCGATCA	0.19	3.47	1.06
1253	GGGGACCAGGTGCCGTAAGGGAGCCGCTTATTTTTTTTTTTTTTTGACAGCCCTGACGGAAGACTCTCCTCCGGCTGCGTCCTCGTCTTCACCGGTCGCGTTCCTGAAACGCAGATGTGCCTACAGCCGCACGCGATCCTAGGGCGATCA	0.17	2.48	1.1
1254	GGGGACCAGGTGCCGTAAGTCTCACCAGCATTTTTTTTTTTTTTTGACACGGAAGACTCTCCTCCGTCTCCTAGCTGCGTCCTCGTCTTCACCGGTCGCGTTCCTGAAACGCAGATGTGCCTACAGCCGCACGCGATCCTAGGGCGATCA	0.11	1.44	1.13
1255	GGGGACCAGGTGCCGTAAGACTCGCCAACATTTTTTTTTTTTTTTGACAGCCCTGACAGACAAGACTCTCCTAGCTGCGTCCTCGTCTTCACCGGTCGCGTTCCTGAAACGCAGATGTGCATGACTCATCACGCGATCCTAGGGCGATCA	2.24	0.07	1.04
1256	GGGGACCAGGTGCCGTAAGAGGTTCTCCCATTTTTTTTTTTTTTTGACAGCCCTGACAGACAAGACTCTCCTAGCTGCGTCCTCGTCTTCACCGGTCGCGTTCCTGATGACTCATTGTGCCTACAGCCGCACGCGATCCTAGGGCGATCA	2.03	0.1	1.19
1257	GGGGACCAGGTGCCGTAAGACAACTCACGATTTTTTTTTTTTTTTGACAGCCCTGACAGACAAGACTCTCCTAGCTGCGTCCTCGTCTTCACCGGTCGCATGACTCATACGCAGATGTGCCTACAGCCGCACGCGATCCTAGGGCGATCA	1.86	0.12	1.17
1258	GGGGACCAGGTGCCGTAAGATGCTGCAGAATTTTTTTTTTTTTTTGACAGCCCTGACAGACAAGACTCTCCTAGCTGCGTCCTCGTCTTCACATGACTCATTCCTGAAACGCAGATGTGCCTACAGCCGCACGCGATCCTAGGGCGATCA	1.2	0.09	1.1
1259	GGGGACCAGGTGCCGTAAGCCGACTTGCAATTTTTTTTTTTTTTTGACAGCCCTGACAGACAAGACTCTCCTAGCTGCGTCCTCGATGACTCATGTCGCGTTCCTGAAACGCAGATGTGCCTACAGCCGCACGCGATCCTAGGGCGATCA	1.37	0.07	1.13
1260	GGGGACCAGGTGCCGTAAGTACGCCGTCGATTTTTTTTTTTTTTTGACAGCCCTGACAGACAAGACTCTCCTAGCTGCATGACTCATTTCACCGGTCGCGTTCCTGAAACGCAGATGTGCCTACAGCCGCACGCGATCCTAGGGCGATCA	1.36	0.08	1.07
1261	GGGGACCAGGTGCCGTAAGGGACTATGCCATTTTTTTTTTTTTTTGACAGCCCTGACAGACAAGATGACTCATGCTGCGTCCTCGTCTTCACCGGTCGCGTTCCTGAAACGCAGATGTGCCTACAGCCGCACGCGATCCTAGGGCGATCA	1.68	0.09	1.18
1262	GGGGACCAGGTGCCGTAAGCGAAGGGCCGATTTTTTTTTTTTTTTGACAGCCCTGACATGACTCATTCTCCTAGCTGCGTCCTCGTCTTCACCGGTCGCGTTCCTGAAACGCAGATGTGCCTACAGCCGCACGCGATCCTAGGGCGATCA	1.2	0.07	1.18
1263	GGGGACCAGGTGCCGTAAGAGGCGTAGACATTTTTTTTTTTTTTTGACAGATGACTCATACAAGACTCTCCTAGCTGCGTCCTCGTCTTCACCGGTCGCGTTCCTGAAACGCAGATGTGCCTACAGCCGCACGCGATCCTAGGGCGATCA	2.73	0.04	1.13
1264	GGGGACCAGGTGCCGTAAGTGAGCGGTATATTTTTTTTTTTTTTTGAATGACTCATCAGACAAGACTCTCCTAGCTGCGTCCTCGTCTTCACCGGTCGCGTTCCTGAAACGCAGATGTGCCTACAGCCGCACGCGATCCTAGGGCGATCA	1.99	0.06	1.13
1265	GGGGACCAGGTGCCGTAAGCTAGCTATCCATTTTTTTTTTTTTTTGACAGCCCTGACAGACAAGACTCTCCTAGCTGCGTCCTCGTCTTCACCGGTCGCGTTCCTGAAACGCAGATGGCCGGAACCGGCCACGCGATCCTAGGGCGATCA	0.2	0.05	1.04
1266	GGGGACCAGGTGCCGTAAGCCACTAGAACATTTTTTTTTTTTTTTGACAGCCCTGACAGACAAGACTCTCCTAGCTGCGTCCTCGTCTTCACCGGTCGCGTTCGCCGGAACCGGCTGTGCCTACAGCCGCACGCGATCCTAGGGCGATCA	0.19	0.05	1.02
1267	GGGGACCAGGTGCCGTAAGCTGACTAGGTATTTTTTTTTTTTTTTGACAGCCCTGACAGACAAGACTCTCCTAGCTGCGTCCTCGTCTTCACCGGTGCCGGAACCGGCACGCAGATGTGCCTACAGCCGCACGCGATCCTAGGGCGATCA	0.2	0.07	1.11
1268	GGGGACCAGGTGCCGTAAGTGTAGATTAAATTTTTTTTTTTTTTTGACAGCCCTGACAGACAAGACTCTCCTAGCTGCGTCCTCGTCTTGCCGGAACCGGCTCCTGAAACGCAGATGTGCCTACAGCCGCACGCGATCCTAGGGCGATCA	0.18	0.09	1.17
1269	GGGGACCAGGTGCCGTAAGCATGTCAGTCATTTTTTTTTTTTTTTGACAGCCCTGACAGACAAGACTCTCCTAGCTGCGTCCGCCGGAACCGGCGTCGCGTTCCTGAAACGCAGATGTGCCTACAGCCGCACGCGATCCTAGGGCGATCA	0.19	0.06	1.15
1270	GGGGACCAGGTGCCGTAAGGCCGCTGCACATTTTTTTTTTTTTTTGACAGCCCTGACAGACAAGACTCTCCTAGCGCCGGAACCGGCTTCACCGGTCGCGTTCCTGAAACGCAGATGTGCCTACAGCCGCACGCGATCCTAGGGCGATCA	0.17	0.11	0.98
1271	GGGGACCAGGTGCCGTAAGCTGAGTATTTATTTTTTTTTTTTTTTGACAGCCCTGACAGACGCCGGAACCGGCGCTGCGTCCTCGTCTTCACCGGTCGCGTTCCTGAAACGCAGATGTGCCTACAGCCGCACGCGATCCTAGGGCGATCA	0.23	0.06	1.14
1272	GGGGACCAGGTGCCGTAAGTCTTTAACGAATTTTTTTTTTTTTTTGACAGCCCTGCCGGAACCGGCTCTCCTAGCTGCGTCCTCGTCTTCACCGGTCGCGTTCCTGAAACGCAGATGTGCCTACAGCCGCACGCGATCCTAGGGCGATCA	0.24	0.07	1.13
1273	GGGGACCAGGTGCCGTAAGAGCTGCTGTGATTTTTTTTTTTTTTTGAGCCGGAACCGGCACAAGACTCTCCTAGCTGCGTCCTCGTCTTCACCGGTCGCGTTCCTGAAACGCAGATGTGCCTACAGCCGCACGCGATCCTAGGGCGATCA	0.16	0.08	1.09
1274	GGGGACCAGGTGCCGTAAGCTGTCCGAGCGCACTAAATCGGAACCCTAAAGGGAGCCCCCGATTTAGAGCTTGACGGGGAAAGCCGGCGAACGTGGCGAGAAAGGAAGGGAAGAAAGCGCCGACGCAAAGAAGCGATCCTAGGGCGATCA	0.14	0.08	0.99
1275	GGGGACCAGGTGCCGTAAGTTAGATTTGGGCACTAAATCGGAACCCTAAAGGGAGCCCCCGATTTAGAGCTTGACGGGGAAAGCCGGCGAACGTGGCGAGAAAGGAAGGGAAGAGACGCAAACCTAGCGGAAGCGATCCTAGGGCGATCA	NaN	0.12	0.85
1276	GGGGACCAGGTGCCGTAAGGAGCAATCATGCACTAAATCGGAACCCTAAAGGGAGCCCCCGATTTAGAGCTTGACGGGGAAAGCCGGCGAACGTGGCGAGAAAGGAAGACGCAAAAGCGCCACCTAGCGGAAGCGATCCTAGGGCGATCA	NaN	0.08	1.23
1277	GGGGACCAGGTGCCGTAAGGCGTGCATAGGCACTAAATCGGAACCCTAAAGGGAGCCCCCGATTTAGAGCTTGACGGGGAAAGCCGGCGAACGTGGCGAGGACGCAAAGGAAGAAAGCGCCACCTAGCGGAAGCGATCCTAGGGCGATCA	0.35	0.07	1
1278	GGGGACCAGGTGCCGTAAGTACCACTAGGGCACTAAATCGGAACCCTAAAGGGAGCCCCCGATTTAGAGCTTGACGGGGAAAGCCGGCGAACGGACGCAAAAAGGAAGGGAAGAAAGCGCCACCTAGCGGAAGCGATCCTAGGGCGATCA	NaN	0.12	1.03
1279	GGGGACCAGGTGCCGTAAGAGCAGGTCCGGCACTAAATCGGAACCCTAAAGGGAGCCCCCGATTTAGAGCTTGACGGGGAAAGCCGGACGCAAAGGCGAGAAAGGAAGGGAAGAAAGCGCCACCTAGCGGAAGCGATCCTAGGGCGATCA	NaN	0.32	0.65
1280	GGGGACCAGGTGCCGTAAGTTTTGTGATCGCACTAAATCGGAACCCTAAAGGGAGCCCCCGATTTAGAGCTTGACGGGGGACGCAAACGAACGTGGCGAGAAAGGAAGGGAAGAAAGCGCCACCTAGCGGAAGCGATCCTAGGGCGATCA	NaN	0.06	1.26
1281	GGGGACCAGGTGCCGTAAGGACGTTGAGGGCACTAAATCGGAACCCTAAAGGGAGCCCCCGATTTAGAGCTTGACGCAAAAAGCCGGCGAACGTGGCGAGAAAGGAAGGGAAGAAAGCGCCACCTAGCGGAAGCGATCCTAGGGCGATCA	0.31	0.21	0.86
1282	GGGGACCAGGTGCCGTAAGGCATTTTCTAGCACTAAATCGGAACCCTAAAGGGAGCCCCCGATTTGACGCAAAACGGGGAAAGCCGGCGAACGTGGCGAGAAAGGAAGGGAAGAAAGCGCCACCTAGCGGAAGCGATCCTAGGGCGATCA	NaN	0.16	0.72
1283	GGGGACCAGGTGCCGTAAGAATCACGAAAGCACTAAATCGGAACCCTAAAGGGAGCCCGACGCAAAGAGCTTGACGGGGAAAGCCGGCGAACGTGGCGAGAAAGGAAGGGAAGAAAGCGCCACCTAGCGGAAGCGATCCTAGGGCGATCA	0.35	0.16	1.25
1284	GGGGACCAGGTGCCGTAAGTGAGCAGTCCGCACTAAATCGGAACCCTAAAGGACGCAAACGATTTAGAGCTTGACGGGGAAAGCCGGCGAACGTGGCGAGAAAGGAAGGGAAGAAAGCGCCACCTAGCGGAAGCGATCCTAGGGCGATCA	0.31	0.07	1.3
1285	GGGGACCAGGTGCCGTAAGGCGTCAGATCGCACTAAATCGGAACGACGCAAAGAGCCCCCGATTTAGAGCTTGACGGGGAAAGCCGGCGAACGTGGCGAGAAAGGAAGGGAAGAAAGCGCCACCTAGCGGAAGCGATCCTAGGGCGATCA	0.23	0.1	0.89
1286	GGGGACCAGGTGCCGTAAGGAATCTCTTCGCACTAAAGACGCAAACTAAAGGGAGCCCCCGATTTAGAGCTTGACGGGGAAAGCCGGCGAACGTGGCGAGAAAGGAAGGGAAGAAAGCGCCACCTAGCGGAAGCGATCCTAGGGCGATCA	NaN	0.23	1.09
1287	GGGGACCAGGTGCCGTAAGTTTTGAGTCGGCACTAAATCGGAACCCTAAAGGGAGCCCCCGATTTAGAGCTTGACGGGGAAAGCCGGCGAACGTGGCGAGAAAGGAAGGGAAGAAAGCCACCCATACATGAAGCGATCCTAGGGCGATCA	0.16	0.12	1.15
1288	GGGGACCAGGTGCCGTAAGCAGGACCGATGCACTAAATCGGAACCCTAAAGGGAGCCCCCGATTTAGAGCTTGACGGGGAAAGCCGGCGAACGTGGCGAGAAAGGAAGGGACACCCATACATCCTAGCGGAAGCGATCCTAGGGCGATCA	0.05	0.08	1.12
1289	GGGGACCAGGTGCCGTAAGGCAGTCGGGAGCACTAAATCGGAACCCTAAAGGGAGCCCCCGATTTAGAGCTTGACGGGGAAAGCCGGCGAACGTGGCGAGAAAGCACCCATACATAGCGCCACCTAGCGGAAGCGATCCTAGGGCGATCA	NaN	0.26	1.11
1290	GGGGACCAGGTGCCGTAAGGTGCAGCTGCGCACTAAATCGGAACCCTAAAGGGAGCCCCCGATTTAGAGCTTGACGGGGAAAGCCGGCGAACGTGGCCACCCATACATGGAAGAAAGCGCCACCTAGCGGAAGCGATCCTAGGGCGATCA	0.11	0.12	1.32
1291	GGGGACCAGGTGCCGTAAGGTAGCCCTCTGCACTAAATCGGAACCCTAAAGGGAGCCCCCGATTTAGAGCTTGACGGGGAAAGCCGGCGACACCCATACATAAGGAAGGGAAGAAAGCGCCACCTAGCGGAAGCGATCCTAGGGCGATCA	NaN	0.16	1.12
1292	GGGGACCAGGTGCCGTAAGTCAGCAGCGGGCACTAAATCGGAACCCTAAAGGGAGCCCCCGATTTAGAGCTTGACGGGGAAAGCACCCATACATGGCGAGAAAGGAAGGGAAGAAAGCGCCACCTAGCGGAAGCGATCCTAGGGCGATCA	NaN	0.14	0.92
1293	GGGGACCAGGTGCCGTAAGATCTGCCCGCGCACTAAATCGGAACCCTAAAGGGAGCCCCCGATTTAGAGCTTGACGCACCCATACATCGAACGTGGCGAGAAAGGAAGGGAAGAAAGCGCCACCTAGCGGAAGCGATCCTAGGGCGATCA	0.13	0.06	1.08
1294	GGGGACCAGGTGCCGTAAGATCCGGTGGAGCACTAAATCGGAACCCTAAAGGGAGCCCCCGATTTAGAGCACCCATACATAAGCCGGCGAACGTGGCGAGAAAGGAAGGGAAGAAAGCGCCACCTAGCGGAAGCGATCCTAGGGCGATCA	NaN	0.05	1.16
1295	GGGGACCAGGTGCCGTAAGCCTGGATTACGCACTAAATCGGAACCCTAAAGGGAGCCCCCGACACCCATACATACGGGGAAAGCCGGCGAACGTGGCGAGAAAGGAAGGGAAGAAAGCGCCACCTAGCGGAAGCGATCCTAGGGCGATCA	NaN	0.12	1.18
1296	GGGGACCAGGTGCCGTAAGGGTATGACTAGCACTAAATCGGAACCCTAAAGGGAGCACCCATACATGAGCTTGACGGGGAAAGCCGGCGAACGTGGCGAGAAAGGAAGGGAAGAAAGCGCCACCTAGCGGAAGCGATCCTAGGGCGATCA	NaN	0.16	1.19
1297	GGGGACCAGGTGCCGTAAGTGCAACTTAAGCACTAAATCGGAACCCTACACCCATACATCGATTTAGAGCTTGACGGGGAAAGCCGGCGAACGTGGCGAGAAAGGAAGGGAAGAAAGCGCCACCTAGCGGAAGCGATCCTAGGGCGATCA	0.33	0.12	1.1
1298	GGGGACCAGGTGCCGTAAGTGAGGAGCTTGCACTAAATCGGCACCCATACATGAGCCCCCGATTTAGAGCTTGACGGGGAAAGCCGGCGAACGTGGCGAGAAAGGAAGGGAAGAAAGCGCCACCTAGCGGAAGCGATCCTAGGGCGATCA	0.31	0.1	0.95
1299	GGGGACCAGGTGCCGTAAGCGTCTCTACGGCACTCACCCATACATCTAAAGGGAGCCCCCGATTTAGAGCTTGACGGGGAAAGCCGGCGAACGTGGCGAGAAAGGAAGGGAAGAAAGCGCCACCTAGCGGAAGCGATCCTAGGGCGATCA	0.39	0.43	1.27
1300	GGGGACCAGGTGCCGTAAGACGCGAGAACGCACTAAATCGGAACCCTAAAGGGAGCCCCCGATTTAGAGCTTGACGGGGAAAGCCGGCGAACGTGGCGAGAAAGGAAGGGAAGAAAGAAACTGTGGCGCGAAGCGATCCTAGGGCGATCA	NaN	NaN	1.01
1301	GGGGACCAGGTGCCGTAAGAGCCGACGTTGCACTAAATCGGAACCCTAAAGGGAGCCCCCGATTTAGAGCTTGACGGGGAAAGCCGGCGAACGTGGCGAGAAAGGAAGGGAAACTGTGGCGCCCTAGCGGAAGCGATCCTAGGGCGATCA	NaN	NaN	NaN
1302	GGGGACCAGGTGCCGTAAGTCTAGTTACGGCACTAAATCGGAACCCTAAAGGGAGCCCCCGATTTAGAGCTTGACGGGGAAAGCCGGCGAACGTGGCGAGAAAAAACTGTGGCGCAGCGCCACCTAGCGGAAGCGATCCTAGGGCGATCA	0.14	0.25	1
1303	GGGGACCAGGTGCCGTAAGGGAGCGTCGCGCACTAAATCGGAACCCTAAAGGGAGCCCCCGATTTAGAGCTTGACGGGGAAAGCCGGCGAACGTGGAAACTGTGGCGCGGAAGAAAGCGCCACCTAGCGGAAGCGATCCTAGGGCGATCA	NaN	0.14	1.33
1304	GGGGACCAGGTGCCGTAAGCCGAACCTCGGCACTAAATCGGAACCCTAAAGGGAGCCCCCGATTTAGAGCTTGACGGGGAAAGCCGGCGAAACTGTGGCGCAAGGAAGGGAAGAAAGCGCCACCTAGCGGAAGCGATCCTAGGGCGATCA	0.13	0.11	1.06
1305	GGGGACCAGGTGCCGTAAGTTGCCTACAGGCACTAAATCGGAACCCTAAAGGGAGCCCCCGATTTAGAGCTTGACGGGGAAAAAACTGTGGCGCGGCGAGAAAGGAAGGGAAGAAAGCGCCACCTAGCGGAAGCGATCCTAGGGCGATCA	0.24	0.16	0.59
1306	GGGGACCAGGTGCCGTAAGGTGAATCAGTGCACTAAATCGGAACCCTAAAGGGAGCCCCCGATTTAGAGCTTGACAAACTGTGGCGCCGAACGTGGCGAGAAAGGAAGGGAAGAAAGCGCCACCTAGCGGAAGCGATCCTAGGGCGATCA	0.15	0.12	1.15
1307	GGGGACCAGGTGCCGTAAGGGCTTAAAACGCACTAAATCGGAACCCTAAAGGGAGCCCCCGATTTAGAAAACTGTGGCGCAAGCCGGCGAACGTGGCGAGAAAGGAAGGGAAGAAAGCGCCACCTAGCGGAAGCGATCCTAGGGCGATCA	0.35	0.09	0.94
1308	GGGGACCAGGTGCCGTAAGCCGTACTGTTGCACTAAATCGGAACCCTAAAGGGAGCCCCCGAAACTGTGGCGCACGGGGAAAGCCGGCGAACGTGGCGAGAAAGGAAGGGAAGAAAGCGCCACCTAGCGGAAGCGATCCTAGGGCGATCA	0.24	0.15	1.17
1309	GGGGACCAGGTGCCGTAAGGCTATCCAACGCACTAAATCGGAACCCTAAAGGGAAAACTGTGGCGCGAGCTTGACGGGGAAAGCCGGCGAACGTGGCGAGAAAGGAAGGGAAGAAAGCGCCACCTAGCGGAAGCGATCCTAGGGCGATCA	0.16	0.11	1.13
1310	GGGGACCAGGTGCCGTAAGCGTTCTAGCAGCACTAAATCGGAACCCTAAACTGTGGCGCCGATTTAGAGCTTGACGGGGAAAGCCGGCGAACGTGGCGAGAAAGGAAGGGAAGAAAGCGCCACCTAGCGGAAGCGATCCTAGGGCGATCA	0.5	0.2	1.35
1311	GGGGACCAGGTGCCGTAAGTGGTATGCGAGCACTAAATCGAAACTGTGGCGCGAGCCCCCGATTTAGAGCTTGACGGGGAAAGCCGGCGAACGTGGCGAGAAAGGAAGGGAAGAAAGCGCCACCTAGCGGAAGCGATCCTAGGGCGATCA	0.11	0.08	0.92
1312	GGGGACCAGGTGCCGTAAGCAATGCACCTGCACAAACTGTGGCGCCTAAAGGGAGCCCCCGATTTAGAGCTTGACGGGGAAAGCCGGCGAACGTGGCGAGAAAGGAAGGGAAGAAAGCGCCACCTAGCGGAAGCGATCCTAGGGCGATCA	NaN	NaN	0.87
1313	GGGGACCAGGTGCCGTAAGGCGTCTTTAAGCACTAAATCGGAACCCTAAAGGGAGCCCCCGATTTAGAGCTTGACGGGGAAAGCCGGCGAACGTGGCGAGAAAGGAAGGGAAGAAAGCGCCGCGCGCGCGAAGCGATCCTAGGGCGATCA	NaN	0.18	1.03
1314	GGGGACCAGGTGCCGTAAGTTGTGAGCAGGCACTAAATCGGAACCCTAAAGGGAGCCCCCGATTTAGAGCTTGACGGGGAAAGCCGGCGAACGTGGCGAGAAAGGAAGGGAAGAGCGCGCGCCCTAGCGGAAGCGATCCTAGGGCGATCA	NaN	NaN	NaN
1315	GGGGACCAGGTGCCGTAAGGGCACTCAACGCACTAAATCGGAACCCTAAAGGGAGCCCCCGATTTAGAGCTTGACGGGGAAAGCCGGCGAACGTGGCGAGAAAGGAAGCGCGCGCAGCGCCACCTAGCGGAAGCGATCCTAGGGCGATCA	NaN	0.1	1.24
1316	GGGGACCAGGTGCCGTAAGCATGGTAGCCGCACTAAATCGGAACCCTAAAGGGAGCCCCCGATTTAGAGCTTGACGGGGAAAGCCGGCGAACGTGGCGAGGCGCGCGCGGAAGAAAGCGCCACCTAGCGGAAGCGATCCTAGGGCGATCA	NaN	0.16	1.17
1317	GGGGACCAGGTGCCGTAAGAAGGACCTTGGCACTAAATCGGAACCCTAAAGGGAGCCCCCGATTTAGAGCTTGACGGGGAAAGCCGGCGAACGGCGCGCGCAAGGAAGGGAAGAAAGCGCCACCTAGCGGAAGCGATCCTAGGGCGATCA	0.17	0.07	1.07
1318	GGGGACCAGGTGCCGTAAGCTCTGTATGGGCACTAAATCGGAACCCTAAAGGGAGCCCCCGATTTAGAGCTTGACGGGGAAAGCCGGCGCGCGCGGCGAGAAAGGAAGGGAAGAAAGCGCCACCTAGCGGAAGCGATCCTAGGGCGATCA	0.31	0.22	1.14
1319	GGGGACCAGGTGCCGTAAGCACTTGGTGGGCACTAAATCGGAACCCTAAAGGGAGCCCCCGATTTAGAGCTTGACGGGGGCGCGCGCCGAACGTGGCGAGAAAGGAAGGGAAGAAAGCGCCACCTAGCGGAAGCGATCCTAGGGCGATCA	0.17	0.08	1.22
1320	GGGGACCAGGTGCCGTAAGGCGCGCACTGGCACTAAATCGGAACCCTAAAGGGAGCCCCCGATTTAGAGCTTGCGCGCGCAAGCCGGCGAACGTGGCGAGAAAGGAAGGGAAGAAAGCGCCACCTAGCGGAAGCGATCCTAGGGCGATCA	0.2	0.11	1.15
1321	GGGGACCAGGTGCCGTAAGGTTCGTTACGGCACTAAATCGGAACCCTAAAGGGAGCCCCCGATTTGCGCGCGCACGGGGAAAGCCGGCGAACGTGGCGAGAAAGGAAGGGAAGAAAGCGCCACCTAGCGGAAGCGATCCTAGGGCGATCA	NaN	0.09	1
1322	GGGGACCAGGTGCCGTAAGCTGCACGTAAGCACTAAATCGGAACCCTAAAGGGAGCCCGCGCGCGCGAGCTTGACGGGGAAAGCCGGCGAACGTGGCGAGAAAGGAAGGGAAGAAAGCGCCACCTAGCGGAAGCGATCCTAGGGCGATCA	0.14	0.11	1.17
1323	GGGGACCAGGTGCCGTAAGACGTAATCAAGCACTAAATCGGAACCCTAAAGGCGCGCGCCGATTTAGAGCTTGACGGGGAAAGCCGGCGAACGTGGCGAGAAAGGAAGGGAAGAAAGCGCCACCTAGCGGAAGCGATCCTAGGGCGATCA	0.22	0.1	1.02
1324	GGGGACCAGGTGCCGTAAGACCCTCGCGCGCACTAAATCGGAACGCGCGCGCGAGCCCCCGATTTAGAGCTTGACGGGGAAAGCCGGCGAACGTGGCGAGAAAGGAAGGGAAGAAAGCGCCACCTAGCGGAAGCGATCCTAGGGCGATCA	NaN	0.03	1.26
1325	GGGGACCAGGTGCCGTAAGGGGCGGACTAGCACTAAAGCGCGCGCCTAAAGGGAGCCCCCGATTTAGAGCTTGACGGGGAAAGCCGGCGAACGTGGCGAGAAAGGAAGGGAAGAAAGCGCCACCTAGCGGAAGCGATCCTAGGGCGATCA	0.35	0.08	1.04
1326	GGGGACCAGGTGCCGTAAGTTGCAGCAATGCACTAAATCGGAACCCTAAAGGGAGCCCCCGATTTAGAGCTTGACGGGGAAAGCCGGCGAACGTGGCGAGAAAGGAAGGGAAGAAAGCGCAGTTGGAGAGAAGCGATCCTAGGGCGATCA	0.18	0.12	1.1
1327	GGGGACCAGGTGCCGTAAGACTTAATTCAGCACTAAATCGGAACCCTAAAGGGAGCCCCCGATTTAGAGCTTGACGGGGAAAGCCGGCGAACGTGGCGAGAAAGGAAGGGAAGAGTTGGAGACCTAGCGGAAGCGATCCTAGGGCGATCA	NaN	0.12	1.31
1328	GGGGACCAGGTGCCGTAAGTTGGCATTGTGCACTAAATCGGAACCCTAAAGGGAGCCCCCGATTTAGAGCTTGACGGGGAAAGCCGGCGAACGTGGCGAGAAAGGAAGTTGGAGAAGCGCCACCTAGCGGAAGCGATCCTAGGGCGATCA	0.16	0.09	1.02
1329	GGGGACCAGGTGCCGTAAGGCGGTGTCTGGCACTAAATCGGAACCCTAAAGGGAGCCCCCGATTTAGAGCTTGACGGGGAAAGCCGGCGAACGTGGCGAAGTTGGAGAGGAAGAAAGCGCCACCTAGCGGAAGCGATCCTAGGGCGATCA	NaN	0.06	0.87
1330	GGGGACCAGGTGCCGTAAGGTTAAGCCGGGCACTAAATCGGAACCCTAAAGGGAGCCCCCGATTTAGAGCTTGACGGGGAAAGCCGGCGAACAGTTGGAGAAAGGAAGGGAAGAAAGCGCCACCTAGCGGAAGCGATCCTAGGGCGATCA	0.26	0.16	1.17
1331	GGGGACCAGGTGCCGTAAGCAACACTCTGGCACTAAATCGGAACCCTAAAGGGAGCCCCCGATTTAGAGCTTGACGGGGAAAGCCAGTTGGAGAGGCGAGAAAGGAAGGGAAGAAAGCGCCACCTAGCGGAAGCGATCCTAGGGCGATCA	NaN	0.12	1.26
1332	GGGGACCAGGTGCCGTAAGAGATCCGTGTGCACTAAATCGGAACCCTAAAGGGAGCCCCCGATTTAGAGCTTGACGGGAGTTGGAGACGAACGTGGCGAGAAAGGAAGGGAAGAAAGCGCCACCTAGCGGAAGCGATCCTAGGGCGATCA	NaN	0.16	0.92
1333	GGGGACCAGGTGCCGTAAGCGCAATACTCGCACTAAATCGGAACCCTAAAGGGAGCCCCCGATTTAGAGCTAGTTGGAGAAAGCCGGCGAACGTGGCGAGAAAGGAAGGGAAGAAAGCGCCACCTAGCGGAAGCGATCCTAGGGCGATCA	0.38	0.12	1.1
1334	GGGGACCAGGTGCCGTAAGGATTGTGACCGCACTAAATCGGAACCCTAAAGGGAGCCCCCGATTAGTTGGAGAACGGGGAAAGCCGGCGAACGTGGCGAGAAAGGAAGGGAAGAAAGCGCCACCTAGCGGAAGCGATCCTAGGGCGATCA	0.21	0.09	0.99
1335	GGGGACCAGGTGCCGTAAGTGAAAGCCCGGCACTAAATCGGAACCCTAAAGGGAGCCAGTTGGAGAGAGCTTGACGGGGAAAGCCGGCGAACGTGGCGAGAAAGGAAGGGAAGAAAGCGCCACCTAGCGGAAGCGATCCTAGGGCGATCA	0.46	0.44	1.25
1336	GGGGACCAGGTGCCGTAAGTACTAAAGACGCACTAAATCGGAACCCTAAAAGTTGGAGACGATTTAGAGCTTGACGGGGAAAGCCGGCGAACGTGGCGAGAAAGGAAGGGAAGAAAGCGCCACCTAGCGGAAGCGATCCTAGGGCGATCA	NaN	NaN	0.9
1337	GGGGACCAGGTGCCGTAAGAGTACCTCCAGCACTAAATCGGAAAGTTGGAGAGAGCCCCCGATTTAGAGCTTGACGGGGAAAGCCGGCGAACGTGGCGAGAAAGGAAGGGAAGAAAGCGCCACCTAGCGGAAGCGATCCTAGGGCGATCA	NaN	0.06	1.21
1338	GGGGACCAGGTGCCGTAAGGCAGGGTTAAGCACTAAAGTTGGAGACTAAAGGGAGCCCCCGATTTAGAGCTTGACGGGGAAAGCCGGCGAACGTGGCGAGAAAGGAAGGGAAGAAAGCGCCACCTAGCGGAAGCGATCCTAGGGCGATCA	NaN	0.03	1
1339	GGGGACCAGGTGCCGTAAGCCCTGTTGACGCACTAAATCGGAACCCTAAAGGGAGCCCCCGATTTAGAGCTTGACGGGGAAAGCCGGCGAACGTGGCGAGAAAGGAAGGGAAGAAATCCATTCATCCGAGAAGCGATCCTAGGGCGATCA	0.14	0.12	0.99
1340	GGGGACCAGGTGCCGTAAGACCGATCGGAGCACTAAATCGGAACCCTAAAGGGAGCCCCCGATTTAGAGCTTGACGGGGAAAGCCGGCGAACGTGGCGAGAAAGGAAGGTCCATTCATCCGACCTAGCGGAAGCGATCCTAGGGCGATCA	0.62	0.08	1
1341	GGGGACCAGGTGCCGTAAGGGACACGGGCGCACTAAATCGGAACCCTAAAGGGAGCCCCCGATTTAGAGCTTGACGGGGAAAGCCGGCGAACGTGGCGAGAATCCATTCATCCGAAGCGCCACCTAGCGGAAGCGATCCTAGGGCGATCA	0.22	0.14	1.05
1342	GGGGACCAGGTGCCGTAAGATGTCGTCAAGCACTAAATCGGAACCCTAAAGGGAGCCCCCGATTTAGAGCTTGACGGGGAAAGCCGGCGAACGTGTCCATTCATCCGAGGAAGAAAGCGCCACCTAGCGGAAGCGATCCTAGGGCGATCA	0.18	0.07	0.81
1343	GGGGACCAGGTGCCGTAAGACGACCTTCGGCACTAAATCGGAACCCTAAAGGGAGCCCCCGATTTAGAGCTTGACGGGGAAAGCCGGCTCCATTCATCCGAAAGGAAGGGAAGAAAGCGCCACCTAGCGGAAGCGATCCTAGGGCGATCA	0.25	0.23	1.14
1344	GGGGACCAGGTGCCGTAAGAACCACGGCAGCACTAAATCGGAACCCTAAAGGGAGCCCCCGATTTAGAGCTTGACGGGGAATCCATTCATCCGAGGCGAGAAAGGAAGGGAAGAAAGCGCCACCTAGCGGAAGCGATCCTAGGGCGATCA	0.34	0.14	1.04
1345	GGGGACCAGGTGCCGTAAGAAAAGGCTTGGCACTAAATCGGAACCCTAAAGGGAGCCCCCGATTTAGAGCTTGATCCATTCATCCGACGAACGTGGCGAGAAAGGAAGGGAAGAAAGCGCCACCTAGCGGAAGCGATCCTAGGGCGATCA	0.12	0.11	0.96
1346	GGGGACCAGGTGCCGTAAGGGAGGCTCGGGCACTAAATCGGAACCCTAAAGGGAGCCCCCGATTTAGTCCATTCATCCGAAAGCCGGCGAACGTGGCGAGAAAGGAAGGGAAGAAAGCGCCACCTAGCGGAAGCGATCCTAGGGCGATCA	NaN	0.12	1.27
1347	GGGGACCAGGTGCCGTAAGAAGTCAGGCCGCACTAAATCGGAACCCTAAAGGGAGCCCCCTCCATTCATCCGAACGGGGAAAGCCGGCGAACGTGGCGAGAAAGGAAGGGAAGAAAGCGCCACCTAGCGGAAGCGATCCTAGGGCGATCA	NaN	0.11	1.18
1348	GGGGACCAGGTGCCGTAAGGCGCCCTGTCGCACTAAATCGGAACCCTAAAGGGTCCATTCATCCGAGAGCTTGACGGGGAAAGCCGGCGAACGTGGCGAGAAAGGAAGGGAAGAAAGCGCCACCTAGCGGAAGCGATCCTAGGGCGATCA	0.39	0.05	1.19
1349	GGGGACCAGGTGCCGTAAGGGTGTCCTACGCACTAAATCGGAACCCTCCATTCATCCGACGATTTAGAGCTTGACGGGGAAAGCCGGCGAACGTGGCGAGAAAGGAAGGGAAGAAAGCGCCACCTAGCGGAAGCGATCCTAGGGCGATCA	0.42	0.15	1.18
1350	GGGGACCAGGTGCCGTAAGTCTACCCGCGGCACTAAATCTCCATTCATCCGAGAGCCCCCGATTTAGAGCTTGACGGGGAAAGCCGGCGAACGTGGCGAGAAAGGAAGGGAAGAAAGCGCCACCTAGCGGAAGCGATCCTAGGGCGATCA	0.47	0.11	1.07
1351	GGGGACCAGGTGCCGTAAGGAAATACTTCGCATCCATTCATCCGACTAAAGGGAGCCCCCGATTTAGAGCTTGACGGGGAAAGCCGGCGAACGTGGCGAGAAAGGAAGGGAAGAAAGCGCCACCTAGCGGAAGCGATCCTAGGGCGATCA	NaN	NaN	1.07
1352	GGGGACCAGGTGCCGTAAGCCCAGCGTACGCACTAAATCGGAACCCTAAAGGGAGCCCCCGATTTAGAGCTTGACGGGGAAAGCCGGCGAACGTGGCGAGAAAGGAAGGGAAGAATTTCCAATGGAATTGAAGCGATCCTAGGGCGATCA	NaN	0.05	0.86
1353	GGGGACCAGGTGCCGTAAGGATATGGGTGGCACTAAATCGGAACCCTAAAGGGAGCCCCCGATTTAGAGCTTGACGGGGAAAGCCGGCGAACGTGGCGAGAAAGGAAATTTCCAATGGAATTCCTAGCGGAAGCGATCCTAGGGCGATCA	NaN	0.12	1.08
1354	GGGGACCAGGTGCCGTAAGGTCCGGGACGGCACTAAATCGGAACCCTAAAGGGAGCCCCCGATTTAGAGCTTGACGGGGAAAGCCGGCGAACGTGGCGAGATTTCCAATGGAATTAGCGCCACCTAGCGGAAGCGATCCTAGGGCGATCA	0.22	0.12	0.96
1355	GGGGACCAGGTGCCGTAAGCGATCTGCATGCACTAAATCGGAACCCTAAAGGGAGCCCCCGATTTAGAGCTTGACGGGGAAAGCCGGCGAACGATTTCCAATGGAATTGGAAGAAAGCGCCACCTAGCGGAAGCGATCCTAGGGCGATCA	0.33	0.13	0.94
1356	GGGGACCAGGTGCCGTAAGTATCTTTAGGGCACTAAATCGGAACCCTAAAGGGAGCCCCCGATTTAGAGCTTGACGGGGAAAGCCGATTTCCAATGGAATTAAGGAAGGGAAGAAAGCGCCACCTAGCGGAAGCGATCCTAGGGCGATCA	NaN	NaN	1.07
1357	GGGGACCAGGTGCCGTAAGCGAATCCTGGGCACTAAATCGGAACCCTAAAGGGAGCCCCCGATTTAGAGCTTGACGGGGATTTCCAATGGAATTGGCGAGAAAGGAAGGGAAGAAAGCGCCACCTAGCGGAAGCGATCCTAGGGCGATCA	0.27	0.09	0.54
1358	GGGGACCAGGTGCCGTAAGGTTCGCCCGTGCACTAAATCGGAACCCTAAAGGGAGCCCCCGATTTAGAGCTTATTTCCAATGGAATTCGAACGTGGCGAGAAAGGAAGGGAAGAAAGCGCCACCTAGCGGAAGCGATCCTAGGGCGATCA	0.12	0.03	0.77
1359	GGGGACCAGGTGCCGTAAGCGCTGGATAGGCACTAAATCGGAACCCTAAAGGGAGCCCCCGATTTATTTCCAATGGAATTAAGCCGGCGAACGTGGCGAGAAAGGAAGGGAAGAAAGCGCCACCTAGCGGAAGCGATCCTAGGGCGATCA	0.33	0.12	0.95
1360	GGGGACCAGGTGCCGTAAGCCCTCGTTTGGCACTAAATCGGAACCCTAAAGGGAGCCCATTTCCAATGGAATTACGGGGAAAGCCGGCGAACGTGGCGAGAAAGGAAGGGAAGAAAGCGCCACCTAGCGGAAGCGATCCTAGGGCGATCA	0.39	0.11	0.85
1361	GGGGACCAGGTGCCGTAAGATGAAGACCAGCACTAAATCGGAACCCTAAAGATTTCCAATGGAATTGAGCTTGACGGGGAAAGCCGGCGAACGTGGCGAGAAAGGAAGGGAAGAAAGCGCCACCTAGCGGAAGCGATCCTAGGGCGATCA	0.24	0.56	0.78
1362	GGGGACCAGGTGCCGTAAGCGAATCGTAAGCACTAAATCGGAACATTTCCAATGGAATTCGATTTAGAGCTTGACGGGGAAAGCCGGCGAACGTGGCGAGAAAGGAAGGGAAGAAAGCGCCACCTAGCGGAAGCGATCCTAGGGCGATCA	0.17	0.14	0.99
1363	GGGGACCAGGTGCCGTAAGGCCGACCTGCGCACTAAAATTTCCAATGGAATTGAGCCCCCGATTTAGAGCTTGACGGGGAAAGCCGGCGAACGTGGCGAGAAAGGAAGGGAAGAAAGCGCCACCTAGCGGAAGCGATCCTAGGGCGATCA	0.32	0.17	1.09
1364	GGGGACCAGGTGCCGTAAGATGACAGCTCGATTTCCAATGGAATTCTAAAGGGAGCCCCCGATTTAGAGCTTGACGGGGAAAGCCGGCGAACGTGGCGAGAAAGGAAGGGAAGAAAGCGCCACCTAGCGGAAGCGATCCTAGGGCGATCA	0.27	0.15	0.96
1365	GGGGACCAGGTGCCGTAAGTGGCGTGTATGCACTAAATCGGAACCCTAAAGGGAGCCCCCGATTTAGAGCTTGACGGGGAAAGCCGGCGAACGTGGCGAGAAAGGAAGGGAAGAAAGCGCGGCTTCCACGAAGCGATCCTAGGGCGATCA	0.19	0.15	1.06
1366	GGGGACCAGGTGCCGTAAGAACGAATCTTGCACTAAATCGGAACCCTAAAGGGAGCCCCCGATTTAGAGCTTGACGGGGAAAGCCGGCGAACGTGGCGAGAAAGGAAGGGAAGGGCTTCCACCCTAGCGGAAGCGATCCTAGGGCGATCA	NaN	0.26	0.9
1367	GGGGACCAGGTGCCGTAAGCGGACGCTTGGCACTAAATCGGAACCCTAAAGGGAGCCCCCGATTTAGAGCTTGACGGGGAAAGCCGGCGAACGTGGCGAGAAAGGAGGCTTCCACAGCGCCACCTAGCGGAAGCGATCCTAGGGCGATCA	0.32	0.18	1.1
1368	GGGGACCAGGTGCCGTAAGCGTGCAGTAAGCACTAAATCGGAACCCTAAAGGGAGCCCCCGATTTAGAGCTTGACGGGGAAAGCCGGCGAACGTGGCGAGGCTTCCACGGAAGAAAGCGCCACCTAGCGGAAGCGATCCTAGGGCGATCA	0.26	0.12	1
1369	GGGGACCAGGTGCCGTAAGCCAGCGAACAGCACTAAATCGGAACCCTAAAGGGAGCCCCCGATTTAGAGCTTGACGGGGAAAGCCGGCGAACGGCTTCCACAAGGAAGGGAAGAAAGCGCCACCTAGCGGAAGCGATCCTAGGGCGATCA	0.77	0.07	1.02
1370	GGGGACCAGGTGCCGTAAGCAACGGCTGTGCACTAAATCGGAACCCTAAAGGGAGCCCCCGATTTAGAGCTTGACGGGGAAAGCCGGCTTCCACGGCGAGAAAGGAAGGGAAGAAAGCGCCACCTAGCGGAAGCGATCCTAGGGCGATCA	0.16	0.12	1.08
1371	GGGGACCAGGTGCCGTAAGATCACATACTGCACTAAATCGGAACCCTAAAGGGAGCCCCCGATTTAGAGCTTGACGGGGGCTTCCACCGAACGTGGCGAGAAAGGAAGGGAAGAAAGCGCCACCTAGCGGAAGCGATCCTAGGGCGATCA	NaN	0.04	0.99
1372	GGGGACCAGGTGCCGTAAGGGTGGCCCTAGCACTAAATCGGAACCCTAAAGGGAGCCCCCGATTTAGAGCTGGCTTCCACAAGCCGGCGAACGTGGCGAGAAAGGAAGGGAAGAAAGCGCCACCTAGCGGAAGCGATCCTAGGGCGATCA	0.2	0.17	1.17
1373	GGGGACCAGGTGCCGTAAGTCTTACAGCGGCACTAAATCGGAACCCTAAAGGGAGCCCCCGATTGGCTTCCACACGGGGAAAGCCGGCGAACGTGGCGAGAAAGGAAGGGAAGAAAGCGCCACCTAGCGGAAGCGATCCTAGGGCGATCA	0.36	0.1	1.21
1374	GGGGACCAGGTGCCGTAAGGTGACCGTCCGCACTAAATCGGAACCCTAAAGGGAGCCGGCTTCCACGAGCTTGACGGGGAAAGCCGGCGAACGTGGCGAGAAAGGAAGGGAAGAAAGCGCCACCTAGCGGAAGCGATCCTAGGGCGATCA	0.15	0.08	1.1
1375	GGGGACCAGGTGCCGTAAGCCCTACGCATGCACTAAATCGGAACCCTAAAGGCTTCCACCGATTTAGAGCTTGACGGGGAAAGCCGGCGAACGTGGCGAGAAAGGAAGGGAAGAAAGCGCCACCTAGCGGAAGCGATCCTAGGGCGATCA	0.24	0.1	1.3
1376	GGGGACCAGGTGCCGTAAGCAATACTACCGCACTAAATCGGAAGGCTTCCACGAGCCCCCGATTTAGAGCTTGACGGGGAAAGCCGGCGAACGTGGCGAGAAAGGAAGGGAAGAAAGCGCCACCTAGCGGAAGCGATCCTAGGGCGATCA	0.14	0.12	1.11
1377	GGGGACCAGGTGCCGTAAGCCGAGTAGCGGCACTAAGGCTTCCACCTAAAGGGAGCCCCCGATTTAGAGCTTGACGGGGAAAGCCGGCGAACGTGGCGAGAAAGGAAGGGAAGAAAGCGCCACCTAGCGGAAGCGATCCTAGGGCGATCA	0.39	0.12	1.27
1378	GGGGACCAGGTGCCGTAAGTCGTAAATCTGCACTAAATCGGAACCCTAAAGGGAGCCCCCGATTTAGAGCTTGACGGGGAAAGCCGGCGAACGTGGCGAGAAAGGAAGGGAAGAAAGCGCTGACTCCGGGAAGCGATCCTAGGGCGATCA	0.31	0.11	0.9
1379	GGGGACCAGGTGCCGTAAGCACTCAGTCTGCACTAAATCGGAACCCTAAAGGGAGCCCCCGATTTAGAGCTTGACGGGGAAAGCCGGCGAACGTGGCGAGAAAGGAAGGGAAGTGACTCCGGCCTAGCGGAAGCGATCCTAGGGCGATCA	0.14	0.03	1.1
1380	GGGGACCAGGTGCCGTAAGAAAGCGCCGGGCACTAAATCGGAACCCTAAAGGGAGCCCCCGATTTAGAGCTTGACGGGGAAAGCCGGCGAACGTGGCGAGAAAGGATGACTCCGGAGCGCCACCTAGCGGAAGCGATCCTAGGGCGATCA	0.22	0.8	1.2
1381	GGGGACCAGGTGCCGTAAGTCGACGCCTAGCACTAAATCGGAACCCTAAAGGGAGCCCCCGATTTAGAGCTTGACGGGGAAAGCCGGCGAACGTGGCGATGACTCCGGGGAAGAAAGCGCCACCTAGCGGAAGCGATCCTAGGGCGATCA	0.15	0.18	1.12
1382	GGGGACCAGGTGCCGTAAGAATGTTGACTGCACTAAATCGGAACCCTAAAGGGAGCCCCCGATTTAGAGCTTGACGGGGAAAGCCGGCGAACTGACTCCGGAAGGAAGGGAAGAAAGCGCCACCTAGCGGAAGCGATCCTAGGGCGATCA	NaN	0.2	1
1383	GGGGACCAGGTGCCGTAAGGCTGCTCGCGGCACTAAATCGGAACCCTAAAGGGAGCCCCCGATTTAGAGCTTGACGGGGAAAGCCTGACTCCGGGGCGAGAAAGGAAGGGAAGAAAGCGCCACCTAGCGGAAGCGATCCTAGGGCGATCA	0.08	0.11	0.96
1384	GGGGACCAGGTGCCGTAAGCCAGGGCTGCGCACTAAATCGGAACCCTAAAGGGAGCCCCCGATTTAGAGCTTGACGGGTGACTCCGGCGAACGTGGCGAGAAAGGAAGGGAAGAAAGCGCCACCTAGCGGAAGCGATCCTAGGGCGATCA	0.23	0.04	0.99
1385	GGGGACCAGGTGCCGTAAGCGGTTGTCCAGCACTAAATCGGAACCCTAAAGGGAGCCCCCGATTTAGAGCTTGACTCCGGAAGCCGGCGAACGTGGCGAGAAAGGAAGGGAAGAAAGCGCCACCTAGCGGAAGCGATCCTAGGGCGATCA	0.2	0.1	0.85
1386	GGGGACCAGGTGCCGTAAGACAATTGAGAGCACTAAATCGGAACCCTAAAGGGAGCCCCCGATTTGACTCCGGACGGGGAAAGCCGGCGAACGTGGCGAGAAAGGAAGGGAAGAAAGCGCCACCTAGCGGAAGCGATCCTAGGGCGATCA	NaN	0.1	1.15
1387	GGGGACCAGGTGCCGTAAGCACTAGTGATGCACTAAATCGGAACCCTAAAGGGAGCCTGACTCCGGGAGCTTGACGGGGAAAGCCGGCGAACGTGGCGAGAAAGGAAGGGAAGAAAGCGCCACCTAGCGGAAGCGATCCTAGGGCGATCA	0.23	0.09	1.13
1388	GGGGACCAGGTGCCGTAAGATTCTTCATGGCACTAAATCGGAACCCTAAATGACTCCGGCGATTTAGAGCTTGACGGGGAAAGCCGGCGAACGTGGCGAGAAAGGAAGGGAAGAAAGCGCCACCTAGCGGAAGCGATCCTAGGGCGATCA	NaN	NaN	1.34
1389	GGGGACCAGGTGCCGTAAGTCGTCAACAAGCACTAAATCGGAATGACTCCGGGAGCCCCCGATTTAGAGCTTGACGGGGAAAGCCGGCGAACGTGGCGAGAAAGGAAGGGAAGAAAGCGCCACCTAGCGGAAGCGATCCTAGGGCGATCA	0.22	0.15	1.06
1390	GGGGACCAGGTGCCGTAAGAGCCCACCAGGCACTAATGACTCCGGCTAAAGGGAGCCCCCGATTTAGAGCTTGACGGGGAAAGCCGGCGAACGTGGCGAGAAAGGAAGGGAAGAAAGCGCCACCTAGCGGAAGCGATCCTAGGGCGATCA	0.49	0.09	1.16
1391	GGGGACCAGGTGCCGTAAGGACGGTACGTAAGCCGGACAGGCAGCGACAGCCCTGACAGACAAGACTCTCCTAGCTGCGTCCTCGTCTTCACCGGTCGCGTTCCTGAAACGCAGATGTGCCGACGCAAACACGCGATCCTAGGGCGATCA	0.2	0.06	1.25
1392	GGGGACCAGGTGCCGTAAGTGACGATTCTAAGCCGGACAGGCAGCGACAGCCCTGACAGACAAGACTCTCCTAGCTGCGTCCTCGTCTTCACCGGTCGCGTTCCTGAAACGCAGGACGCAAAACAGCCGCACGCGATCCTAGGGCGATCA	0.15	0.08	1.25
1393	GGGGACCAGGTGCCGTAAGAATTCGGTGTAAGCCGGACAGGCAGCGACAGCCCTGACAGACAAGACTCTCCTAGCTGCGTCCTCGTCTTCACCGGTCGCGTTCCTGAGACGCAAATGTGCCTACAGCCGCACGCGATCCTAGGGCGATCA	0.15	0.05	1.34
1394	GGGGACCAGGTGCCGTAAGGTCCGAGGCTAAGCCGGACAGGCAGCGACAGCCCTGACAGACAAGACTCTCCTAGCTGCGTCCTCGTCTTCACCGGTCGCGGACGCAAAACGCAGATGTGCCTACAGCCGCACGCGATCCTAGGGCGATCA	0.31	0.05	1.22
1395	GGGGACCAGGTGCCGTAAGCGGTACCAGGAAGCCGGACAGGCAGCGACAGCCCTGACAGACAAGACTCTCCTAGCTGCGTCCTCGTCTTCACCGACGCAAATCCTGAAACGCAGATGTGCCTACAGCCGCACGCGATCCTAGGGCGATCA	0.22	0.04	1.3
1396	GGGGACCAGGTGCCGTAAGTTAGTGGCCGAAGCCGGACAGGCAGCGACAGCCCTGACAGACAAGACTCTCCTAGCTGCGTCCTCGTGACGCAAAGTCGCGTTCCTGAAACGCAGATGTGCCTACAGCCGCACGCGATCCTAGGGCGATCA	0.35	0.06	1.17
1397	GGGGACCAGGTGCCGTAAGCACAGTGCGAAAGCCGGACAGGCAGCGACAGCCCTGACAGACAAGACTCTCCTAGCTGCGGACGCAAATTCACCGGTCGCGTTCCTGAAACGCAGATGTGCCTACAGCCGCACGCGATCCTAGGGCGATCA	0.22	0.11	1.18
1398	GGGGACCAGGTGCCGTAAGCAGCTATCTTAAGCCGGACAGGCAGCGACAGCCCTGACAGACAAGACTCTCCTGACGCAAACCTCGTCTTCACCGGTCGCGTTCCTGAAACGCAGATGTGCCTACAGCCGCACGCGATCCTAGGGCGATCA	0.2	0.06	1.21
1399	GGGGACCAGGTGCCGTAAGGCCGAGACAGAAGCCGGACAGGCAGCGACAGCCCTGACAGACAAGAGACGCAAAGCTGCGTCCTCGTCTTCACCGGTCGCGTTCCTGAAACGCAGATGTGCCTACAGCCGCACGCGATCCTAGGGCGATCA	0.25	0.07	1.17
1400	GGGGACCAGGTGCCGTAAGGACTCAATTTAAGCCGGACAGGCAGCGACAGCCCTGACAGACGCAAATCTCCTAGCTGCGTCCTCGTCTTCACCGGTCGCGTTCCTGAAACGCAGATGTGCCTACAGCCGCACGCGATCCTAGGGCGATCA	0.2	0.09	1.23
1401	GGGGACCAGGTGCCGTAAGCTAACCGATAAAGCCGGACAGGCAGCGACAGCGACGCAAAACAAGACTCTCCTAGCTGCGTCCTCGTCTTCACCGGTCGCGTTCCTGAAACGCAGATGTGCCTACAGCCGCACGCGATCCTAGGGCGATCA	0.17	0.07	1.35
1402	GGGGACCAGGTGCCGTAAGAGGCTTGCCGAAGCCGGACAGGCAGGACGCAAACTGACAGACAAGACTCTCCTAGCTGCGTCCTCGTCTTCACCGGTCGCGTTCCTGAAACGCAGATGTGCCTACAGCCGCACGCGATCCTAGGGCGATCA	0.18	0.05	1.28
1403	GGGGACCAGGTGCCGTAAGTTAAACGTGCAAGCCGGAGACGCAAAGACAGCCCTGACAGACAAGACTCTCCTAGCTGCGTCCTCGTCTTCACCGGTCGCGTTCCTGAAACGCAGATGTGCCTACAGCCGCACGCGATCCTAGGGCGATCA	0.13	0.07	1.27
1404	GGGGACCAGGTGCCGTAAGGCGTTGCGATAAGCCGGACAGGCAGCGACAGCCCTGACAGACAAGACTCTCCTAGCTGCGTCCTCGTCTTCACCGGTCGCGTTCCTGAAACGCAGATGTCACCCATACATCACGCGATCCTAGGGCGATCA	0.12	0.08	1.29
1405	GGGGACCAGGTGCCGTAAGAAGCGAGCCTAAGCCGGACAGGCAGCGACAGCCCTGACAGACAAGACTCTCCTAGCTGCGTCCTCGTCTTCACCGGTCGCGTTCCTGAAACGCACCCATACATACAGCCGCACGCGATCCTAGGGCGATCA	0.18	0.06	1.41
1406	GGGGACCAGGTGCCGTAAGCATACCGTCTAAGCCGGACAGGCAGCGACAGCCCTGACAGACAAGACTCTCCTAGCTGCGTCCTCGTCTTCACCGGTCGCGTTCCCACCCATACATTGTGCCTACAGCCGCACGCGATCCTAGGGCGATCA	0.14	0.05	1.34
1407	GGGGACCAGGTGCCGTAAGAGCCCTCTGCAAGCCGGACAGGCAGCGACAGCCCTGACAGACAAGACTCTCCTAGCTGCGTCCTCGTCTTCACCGGTCCACCCATACATACGCAGATGTGCCTACAGCCGCACGCGATCCTAGGGCGATCA	0.2	0.1	1.35
1408	GGGGACCAGGTGCCGTAAGTCCGAGGGTCAAGCCGGACAGGCAGCGACAGCCCTGACAGACAAGACTCTCCTAGCTGCGTCCTCGTCTTCCACCCATACATTCCTGAAACGCAGATGTGCCTACAGCCGCACGCGATCCTAGGGCGATCA	0.11	0.05	1.25
1409	GGGGACCAGGTGCCGTAAGCTCTCGGTCCAAGCCGGACAGGCAGCGACAGCCCTGACAGACAAGACTCTCCTAGCTGCGTCCTCACCCATACATGTCGCGTTCCTGAAACGCAGATGTGCCTACAGCCGCACGCGATCCTAGGGCGATCA	0.19	0.06	1.31
1410	GGGGACCAGGTGCCGTAAGTTAAAGTGTAAAGCCGGACAGGCAGCGACAGCCCTGACAGACAAGACTCTCCTAGCTCACCCATACATTTCACCGGTCGCGTTCCTGAAACGCAGATGTGCCTACAGCCGCACGCGATCCTAGGGCGATCA	0.22	0.06	1.26
1411	GGGGACCAGGTGCCGTAAGCTTGTGTATCAAGCCGGACAGGCAGCGACAGCCCTGACAGACAAGACTCTCACCCATACATCCTCGTCTTCACCGGTCGCGTTCCTGAAACGCAGATGTGCCTACAGCCGCACGCGATCCTAGGGCGATCA	0.18	0.06	1.18
1412	GGGGACCAGGTGCCGTAAGGTACGGTGAGAAGCCGGACAGGCAGCGACAGCCCTGACAGACACACCCATACATGCTGCGTCCTCGTCTTCACCGGTCGCGTTCCTGAAACGCAGATGTGCCTACAGCCGCACGCGATCCTAGGGCGATCA	0.18	0.08	1.36
1413	GGGGACCAGGTGCCGTAAGGGCGTTGAACAAGCCGGACAGGCAGCGACAGCCCTGCACCCATACATTCTCCTAGCTGCGTCCTCGTCTTCACCGGTCGCGTTCCTGAAACGCAGATGTGCCTACAGCCGCACGCGATCCTAGGGCGATCA	0.18	0.05	1.33
1414	GGGGACCAGGTGCCGTAAGCGAAGCTTAGAAGCCGGACAGGCAGCGACCACCCATACATACAAGACTCTCCTAGCTGCGTCCTCGTCTTCACCGGTCGCGTTCCTGAAACGCAGATGTGCCTACAGCCGCACGCGATCCTAGGGCGATCA	0.16	0.06	1.29
1415	GGGGACCAGGTGCCGTAAGCGGGAGCTCGAAGCCGGACAGGCACCCATACATCTGACAGACAAGACTCTCCTAGCTGCGTCCTCGTCTTCACCGGTCGCGTTCCTGAAACGCAGATGTGCCTACAGCCGCACGCGATCCTAGGGCGATCA	0.2	0.05	1.43
1416	GGGGACCAGGTGCCGTAAGGCAAGCGGTTAAGCCCACCCATACATGACAGCCCTGACAGACAAGACTCTCCTAGCTGCGTCCTCGTCTTCACCGGTCGCGTTCCTGAAACGCAGATGTGCCTACAGCCGCACGCGATCCTAGGGCGATCA	0.15	0.06	1.24
1417	GGGGACCAGGTGCCGTAAGAAATCGCACAAAGCCGGACAGGCAGCGACAGCCCTGACAGACAAGACTCTCCTAGCTGCGTCCTCGTCTTCACCGGTCGCGTTCCTGAAACGCAGATGAAACTGTGGCGCCACGCGATCCTAGGGCGATCA	0.17	0.08	1.13
1418	GGGGACCAGGTGCCGTAAGCCAAGCAATCAAGCCGGACAGGCAGCGACAGCCCTGACAGACAAGACTCTCCTAGCTGCGTCCTCGTCTTCACCGGTCGCGTTCCTGAAACAAACTGTGGCGCACAGCCGCACGCGATCCTAGGGCGATCA	0.19	0.05	1.48
1419	GGGGACCAGGTGCCGTAAGTGAGCTGCCGAAGCCGGACAGGCAGCGACAGCCCTGACAGACAAGACTCTCCTAGCTGCGTCCTCGTCTTCACCGGTCGCGTTCAAACTGTGGCGCTGTGCCTACAGCCGCACGCGATCCTAGGGCGATCA	0.17	0.04	1.24
1420	GGGGACCAGGTGCCGTAAGTACCACGCCTAAGCCGGACAGGCAGCGACAGCCCTGACAGACAAGACTCTCCTAGCTGCGTCCTCGTCTTCACCGGTAAACTGTGGCGCACGCAGATGTGCCTACAGCCGCACGCGATCCTAGGGCGATCA	0.16	0.07	1.32
1421	GGGGACCAGGTGCCGTAAGGTGGCATGTGAAGCCGGACAGGCAGCGACAGCCCTGACAGACAAGACTCTCCTAGCTGCGTCCTCGTCTTAAACTGTGGCGCTCCTGAAACGCAGATGTGCCTACAGCCGCACGCGATCCTAGGGCGATCA	0.2	0.05	1.25
1422	GGGGACCAGGTGCCGTAAGACGGACAGGGAAGCCGGACAGGCAGCGACAGCCCTGACAGACAAGACTCTCCTAGCTGCGTCCAAACTGTGGCGCGTCGCGTTCCTGAAACGCAGATGTGCCTACAGCCGCACGCGATCCTAGGGCGATCA	0.2	0.06	1.25
1423	GGGGACCAGGTGCCGTAAGATGAAATTTCAAGCCGGACAGGCAGCGACAGCCCTGACAGACAAGACTCTCCTAGCAAACTGTGGCGCTTCACCGGTCGCGTTCCTGAAACGCAGATGTGCCTACAGCCGCACGCGATCCTAGGGCGATCA	0.19	0.04	1.12
1424	GGGGACCAGGTGCCGTAAGAACCTTTGGTAAGCCGGACAGGCAGCGACAGCCCTGACAGACAAGACTCAAACTGTGGCGCCCTCGTCTTCACCGGTCGCGTTCCTGAAACGCAGATGTGCCTACAGCCGCACGCGATCCTAGGGCGATCA	0.19	0.08	1.26
1425	GGGGACCAGGTGCCGTAAGCCCAGTTTGCAAGCCGGACAGGCAGCGACAGCCCTGACAGACAAACTGTGGCGCGCTGCGTCCTCGTCTTCACCGGTCGCGTTCCTGAAACGCAGATGTGCCTACAGCCGCACGCGATCCTAGGGCGATCA	0.16	0.07	1.24
1426	GGGGACCAGGTGCCGTAAGCTAACAAAGAAAGCCGGACAGGCAGCGACAGCCCTAAACTGTGGCGCTCTCCTAGCTGCGTCCTCGTCTTCACCGGTCGCGTTCCTGAAACGCAGATGTGCCTACAGCCGCACGCGATCCTAGGGCGATCA	0.18	0.06	1.37
1427	GGGGACCAGGTGCCGTAAGCCTTCGTCCAAAGCCGGACAGGCAGCGAAAACTGTGGCGCACAAGACTCTCCTAGCTGCGTCCTCGTCTTCACCGGTCGCGTTCCTGAAACGCAGATGTGCCTACAGCCGCACGCGATCCTAGGGCGATCA	0.18	0.07	1.2
1428	GGGGACCAGGTGCCGTAAGAGCTGTCCGAAAGCCGGACAGAAACTGTGGCGCCTGACAGACAAGACTCTCCTAGCTGCGTCCTCGTCTTCACCGGTCGCGTTCCTGAAACGCAGATGTGCCTACAGCCGCACGCGATCCTAGGGCGATCA	0.22	0.05	1.25
1429	GGGGACCAGGTGCCGTAAGGGAGCTCAAAAAGCAAACTGTGGCGCGACAGCCCTGACAGACAAGACTCTCCTAGCTGCGTCCTCGTCTTCACCGGTCGCGTTCCTGAAACGCAGATGTGCCTACAGCCGCACGCGATCCTAGGGCGATCA	0.17	0.06	1.39
1430	GGGGACCAGGTGCCGTAAGCGACAGATATAAGCCGGACAGGCAGCGACAGCCCTGACAGACAAGACTCTCCTAGCTGCGTCCTCGTCTTCACCGGTCGCGTTCCTGAAACGCAGATGTGCCGCGCGCGCCACGCGATCCTAGGGCGATCA	0.22	0.06	1.17
1431	GGGGACCAGGTGCCGTAAGTGTGCGGCTGAAGCCGGACAGGCAGCGACAGCCCTGACAGACAAGACTCTCCTAGCTGCGTCCTCGTCTTCACCGGTCGCGTTCCTGAAACGCAGGCGCGCGCACAGCCGCACGCGATCCTAGGGCGATCA	0.34	0.08	1.39
1432	GGGGACCAGGTGCCGTAAGGACGGTCATTAAGCCGGACAGGCAGCGACAGCCCTGACAGACAAGACTCTCCTAGCTGCGTCCTCGTCTTCACCGGTCGCGTTCCTGAGCGCGCGCTGTGCCTACAGCCGCACGCGATCCTAGGGCGATCA	0.36	0.09	1.39
1433	GGGGACCAGGTGCCGTAAGGTGATTAAGGAAGCCGGACAGGCAGCGACAGCCCTGACAGACAAGACTCTCCTAGCTGCGTCCTCGTCTTCACCGGTCGCGGCGCGCGCACGCAGATGTGCCTACAGCCGCACGCGATCCTAGGGCGATCA	0.28	0.06	1.26
1434	GGGGACCAGGTGCCGTAAGAGCTGCACGGAAGCCGGACAGGCAGCGACAGCCCTGACAGACAAGACTCTCCTAGCTGCGTCCTCGTCTTCACCGCGCGCGCTCCTGAAACGCAGATGTGCCTACAGCCGCACGCGATCCTAGGGCGATCA	0.19	0.04	1.29
1435	GGGGACCAGGTGCCGTAAGAGTTTGTAATAAGCCGGACAGGCAGCGACAGCCCTGACAGACAAGACTCTCCTAGCTGCGTCCTCGTGCGCGCGCGTCGCGTTCCTGAAACGCAGATGTGCCTACAGCCGCACGCGATCCTAGGGCGATCA	0.19	0.05	1.39
1436	GGGGACCAGGTGCCGTAAGTTGGTGTCCAAAGCCGGACAGGCAGCGACAGCCCTGACAGACAAGACTCTCCTAGCTGCGGCGCGCGCTTCACCGGTCGCGTTCCTGAAACGCAGATGTGCCTACAGCCGCACGCGATCCTAGGGCGATCA	0.28	0.12	1.33
1437	GGGGACCAGGTGCCGTAAGTCTTACATGCAAGCCGGACAGGCAGCGACAGCCCTGACAGACAAGACTCTCCTGCGCGCGCCCTCGTCTTCACCGGTCGCGTTCCTGAAACGCAGATGTGCCTACAGCCGCACGCGATCCTAGGGCGATCA	0.18	0.07	1.29
1438	GGGGACCAGGTGCCGTAAGCTACGGTTAAAAGCCGGACAGGCAGCGACAGCCCTGACAGACAAGAGCGCGCGCGCTGCGTCCTCGTCTTCACCGGTCGCGTTCCTGAAACGCAGATGTGCCTACAGCCGCACGCGATCCTAGGGCGATCA	0.33	0.08	1.38
1439	GGGGACCAGGTGCCGTAAGATGATTGCTTAAGCCGGACAGGCAGCGACAGCCCTGACAGCGCGCGCTCTCCTAGCTGCGTCCTCGTCTTCACCGGTCGCGTTCCTGAAACGCAGATGTGCCTACAGCCGCACGCGATCCTAGGGCGATCA	0.23	0.04	1.41
1440	GGGGACCAGGTGCCGTAAGTGACCGAACAAAGCCGGACAGGCAGCGACAGCGCGCGCGCACAAGACTCTCCTAGCTGCGTCCTCGTCTTCACCGGTCGCGTTCCTGAAACGCAGATGTGCCTACAGCCGCACGCGATCCTAGGGCGATCA	0.22	0.06	1.3
1441	GGGGACCAGGTGCCGTAAGAAAGCCTCAGAAGCCGGACAGGCAGGCGCGCGCCTGACAGACAAGACTCTCCTAGCTGCGTCCTCGTCTTCACCGGTCGCGTTCCTGAAACGCAGATGTGCCTACAGCCGCACGCGATCCTAGGGCGATCA	0.21	0.15	1.29
1442	GGGGACCAGGTGCCGTAAGATTTGAGAGGAAGCCGGAGCGCGCGCGACAGCCCTGACAGACAAGACTCTCCTAGCTGCGTCCTCGTCTTCACCGGTCGCGTTCCTGAAACGCAGATGTGCCTACAGCCGCACGCGATCCTAGGGCGATCA	0.19	0.05	1.41
1443	GGGGACCAGGTGCCGTAAGCGAGGGTACAAAGCCGGACAGGCAGCGACAGCCCTGACAGACAAGACTCTCCTAGCTGCGTCCTCGTCTTCACCGGTCGCGTTCCTGAAACGCAGATGTGCAGTTGGAGACACGCGATCCTAGGGCGATCA	0.19	0.05	1.2
1444	GGGGACCAGGTGCCGTAAGATTTTAAACGAAGCCGGACAGGCAGCGACAGCCCTGACAGACAAGACTCTCCTAGCTGCGTCCTCGTCTTCACCGGTCGCGTTCCTGAAACGCAAGTTGGAGAACAGCCGCACGCGATCCTAGGGCGATCA	0.19	0.06	1.28
1445	GGGGACCAGGTGCCGTAAGATTTGTTGAAAAGCCGGACAGGCAGCGACAGCCCTGACAGACAAGACTCTCCTAGCTGCGTCCTCGTCTTCACCGGTCGCGTTCCTGAGTTGGAGATGTGCCTACAGCCGCACGCGATCCTAGGGCGATCA	0.17	0.06	1.27
1446	GGGGACCAGGTGCCGTAAGAACGACGATAAAGCCGGACAGGCAGCGACAGCCCTGACAGACAAGACTCTCCTAGCTGCGTCCTCGTCTTCACCGGTCGCAGTTGGAGAACGCAGATGTGCCTACAGCCGCACGCGATCCTAGGGCGATCA	0.18	0.07	1.22
1447	GGGGACCAGGTGCCGTAAGGAACGCACCGAAGCCGGACAGGCAGCGACAGCCCTGACAGACAAGACTCTCCTAGCTGCGTCCTCGTCTTCACAGTTGGAGATCCTGAAACGCAGATGTGCCTACAGCCGCACGCGATCCTAGGGCGATCA	0.21	0.05	1.23
1448	GGGGACCAGGTGCCGTAAGGCAACTTGCGAAGCCGGACAGGCAGCGACAGCCCTGACAGACAAGACTCTCCTAGCTGCGTCCTCGAGTTGGAGAGTCGCGTTCCTGAAACGCAGATGTGCCTACAGCCGCACGCGATCCTAGGGCGATCA	0.26	0.07	1.25
1449	GGGGACCAGGTGCCGTAAGCTGTAGTCGGAAGCCGGACAGGCAGCGACAGCCCTGACAGACAAGACTCTCCTAGCTGCAGTTGGAGATTCACCGGTCGCGTTCCTGAAACGCAGATGTGCCTACAGCCGCACGCGATCCTAGGGCGATCA	0.22	0.06	1.17
1450	GGGGACCAGGTGCCGTAAGGCGAATGTACAAGCCGGACAGGCAGCGACAGCCCTGACAGACAAGACTCTCCAGTTGGAGACCTCGTCTTCACCGGTCGCGTTCCTGAAACGCAGATGTGCCTACAGCCGCACGCGATCCTAGGGCGATCA	0.18	0.08	1.17
1451	GGGGACCAGGTGCCGTAAGTGGCTTAGCTAAGCCGGACAGGCAGCGACAGCCCTGACAGACAAGAGTTGGAGAGCTGCGTCCTCGTCTTCACCGGTCGCGTTCCTGAAACGCAGATGTGCCTACAGCCGCACGCGATCCTAGGGCGATCA	0.16	0.07	1.29
1452	GGGGACCAGGTGCCGTAAGCGCCGTGCTAAAGCCGGACAGGCAGCGACAGCCCTGACAGTTGGAGATCTCCTAGCTGCGTCCTCGTCTTCACCGGTCGCGTTCCTGAAACGCAGATGTGCCTACAGCCGCACGCGATCCTAGGGCGATCA	0.42	0.03	1.37
1453	GGGGACCAGGTGCCGTAAGGTAATGACCTAAGCCGGACAGGCAGCGACAGAGTTGGAGAACAAGACTCTCCTAGCTGCGTCCTCGTCTTCACCGGTCGCGTTCCTGAAACGCAGATGTGCCTACAGCCGCACGCGATCCTAGGGCGATCA	0.26	0.04	1.39
1454	GGGGACCAGGTGCCGTAAGTCCTGTGAACAAGCCGGACAGGCAAGTTGGAGACTGACAGACAAGACTCTCCTAGCTGCGTCCTCGTCTTCACCGGTCGCGTTCCTGAAACGCAGATGTGCCTACAGCCGCACGCGATCCTAGGGCGATCA	0.22	0.05	1.19
1455	GGGGACCAGGTGCCGTAAGGCAATCAGCGAAGCCGGAGTTGGAGAGACAGCCCTGACAGACAAGACTCTCCTAGCTGCGTCCTCGTCTTCACCGGTCGCGTTCCTGAAACGCAGATGTGCCTACAGCCGCACGCGATCCTAGGGCGATCA	0.19	0.08	1.31
1456	GGGGACCAGGTGCCGTAAGTGAAGCGGCGAAGCCGGACAGGCAGCGACAGCCCTGACAGACAAGACTCTCCTAGCTGCGTCCTCGTCTTCACCGGTCGCGTTCCTGAAACGCAGATTCCATTCATCCGACACGCGATCCTAGGGCGATCA	0.18	0.06	1.25
1457	GGGGACCAGGTGCCGTAAGCAGGTGCTACAAGCCGGACAGGCAGCGACAGCCCTGACAGACAAGACTCTCCTAGCTGCGTCCTCGTCTTCACCGGTCGCGTTCCTGAAATCCATTCATCCGAACAGCCGCACGCGATCCTAGGGCGATCA	0.19	0.06	1.16
1458	GGGGACCAGGTGCCGTAAGTCTATGTGCAAAGCCGGACAGGCAGCGACAGCCCTGACAGACAAGACTCTCCTAGCTGCGTCCTCGTCTTCACCGGTCGCGTTTCCATTCATCCGATGTGCCTACAGCCGCACGCGATCCTAGGGCGATCA	0.17	0.06	1.33
1459	GGGGACCAGGTGCCGTAAGCTCTCGCTAAAAGCCGGACAGGCAGCGACAGCCCTGACAGACAAGACTCTCCTAGCTGCGTCCTCGTCTTCACCGGTCCATTCATCCGAACGCAGATGTGCCTACAGCCGCACGCGATCCTAGGGCGATCA	0.17	0.14	1.42
1460	GGGGACCAGGTGCCGTAAGTGAGTTGTTCAAGCCGGACAGGCAGCGACAGCCCTGACAGACAAGACTCTCCTAGCTGCGTCCTCGTCTTCCATTCATCCGATCCTGAAACGCAGATGTGCCTACAGCCGCACGCGATCCTAGGGCGATCA	0.22	0.06	1.21
1461	GGGGACCAGGTGCCGTAAGCGTGACTTAGAAGCCGGACAGGCAGCGACAGCCCTGACAGACAAGACTCTCCTAGCTGCGTCTCCATTCATCCGAGTCGCGTTCCTGAAACGCAGATGTGCCTACAGCCGCACGCGATCCTAGGGCGATCA	0.16	0.06	1.22
1462	GGGGACCAGGTGCCGTAAGATGGGTTAAAAAGCCGGACAGGCAGCGACAGCCCTGACAGACAAGACTCTCCTAGTCCATTCATCCGATTCACCGGTCGCGTTCCTGAAACGCAGATGTGCCTACAGCCGCACGCGATCCTAGGGCGATCA	0.19	0.17	1.22
1463	GGGGACCAGGTGCCGTAAGCTTTGAGGTCAAGCCGGACAGGCAGCGACAGCCCTGACAGACAAGACTTCCATTCATCCGACCTCGTCTTCACCGGTCGCGTTCCTGAAACGCAGATGTGCCTACAGCCGCACGCGATCCTAGGGCGATCA	0.22	0.07	1.15
1464	GGGGACCAGGTGCCGTAAGAGTTCAGCCGAAGCCGGACAGGCAGCGACAGCCCTGACAGATCCATTCATCCGAGCTGCGTCCTCGTCTTCACCGGTCGCGTTCCTGAAACGCAGATGTGCCTACAGCCGCACGCGATCCTAGGGCGATCA	0.26	0.06	1.19
1465	GGGGACCAGGTGCCGTAAGTTAGCCGTTCAAGCCGGACAGGCAGCGACAGCCCTCCATTCATCCGATCTCCTAGCTGCGTCCTCGTCTTCACCGGTCGCGTTCCTGAAACGCAGATGTGCCTACAGCCGCACGCGATCCTAGGGCGATCA	0.19	0.05	1.35
1466	GGGGACCAGGTGCCGTAAGTCAAAGAGATAAGCCGGACAGGCAGCGTCCATTCATCCGAACAAGACTCTCCTAGCTGCGTCCTCGTCTTCACCGGTCGCGTTCCTGAAACGCAGATGTGCCTACAGCCGCACGCGATCCTAGGGCGATCA	0.17	0.06	1.14
1467	GGGGACCAGGTGCCGTAAGTTTTAAAGGCAAGCCGGACATCCATTCATCCGACTGACAGACAAGACTCTCCTAGCTGCGTCCTCGTCTTCACCGGTCGCGTTCCTGAAACGCAGATGTGCCTACAGCCGCACGCGATCCTAGGGCGATCA	0.25	0.09	1.24
1468	GGGGACCAGGTGCCGTAAGAAGCGTTTCGAAGTCCATTCATCCGAGACAGCCCTGACAGACAAGACTCTCCTAGCTGCGTCCTCGTCTTCACCGGTCGCGTTCCTGAAACGCAGATGTGCCTACAGCCGCACGCGATCCTAGGGCGATCA	0.14	0.07	1.39
1469	GGGGACCAGGTGCCGTAAGTAGACTGACGAAGCCGGACAGGCAGCGACAGCCCTGACAGACAAGACTCTCCTAGCTGCGTCCTCGTCTTCACCGGTCGCGTTCCTGAAACGCAGATTTCCAATGGAATTCACGCGATCCTAGGGCGATCA	0.16	0.08	1.12
1470	GGGGACCAGGTGCCGTAAGACTGGTCCAAAAGCCGGACAGGCAGCGACAGCCCTGACAGACAAGACTCTCCTAGCTGCGTCCTCGTCTTCACCGGTCGCGTTCCTGAATTTCCAATGGAATTACAGCCGCACGCGATCCTAGGGCGATCA	0.18	0.05	1.1
1471	GGGGACCAGGTGCCGTAAGAGTTTTGAAAAAGCCGGACAGGCAGCGACAGCCCTGACAGACAAGACTCTCCTAGCTGCGTCCTCGTCTTCACCGGTCGCGATTTCCAATGGAATTTGTGCCTACAGCCGCACGCGATCCTAGGGCGATCA	0.26	0.11	1.16
1472	GGGGACCAGGTGCCGTAAGAAAGCCCGTTAAGCCGGACAGGCAGCGACAGCCCTGACAGACAAGACTCTCCTAGCTGCGTCCTCGTCTTCACCATTTCCAATGGAATTACGCAGATGTGCCTACAGCCGCACGCGATCCTAGGGCGATCA	0.18	0.07	1.25
1473	GGGGACCAGGTGCCGTAAGTTCATACTAAAAGCCGGACAGGCAGCGACAGCCCTGACAGACAAGACTCTCCTAGCTGCGTCCTCGTATTTCCAATGGAATTTCCTGAAACGCAGATGTGCCTACAGCCGCACGCGATCCTAGGGCGATCA	0.2	0.05	0.95
1474	GGGGACCAGGTGCCGTAAGGCTGTTAGAGAAGCCGGACAGGCAGCGACAGCCCTGACAGACAAGACTCTCCTAGCTGCGATTTCCAATGGAATTGTCGCGTTCCTGAAACGCAGATGTGCCTACAGCCGCACGCGATCCTAGGGCGATCA	0.26	0.07	1.06
1475	GGGGACCAGGTGCCGTAAGTCGAGTACGCAAGCCGGACAGGCAGCGACAGCCCTGACAGACAAGACTCTCCTATTTCCAATGGAATTTTCACCGGTCGCGTTCCTGAAACGCAGATGTGCCTACAGCCGCACGCGATCCTAGGGCGATCA	0.19	0.07	0.82
1476	GGGGACCAGGTGCCGTAAGAATGACTGTTAAGCCGGACAGGCAGCGACAGCCCTGACAGACAAGAATTTCCAATGGAATTCCTCGTCTTCACCGGTCGCGTTCCTGAAACGCAGATGTGCCTACAGCCGCACGCGATCCTAGGGCGATCA	0.24	0.06	0.75
1477	GGGGACCAGGTGCCGTAAGCCTACCATACAAGCCGGACAGGCAGCGACAGCCCTGACAATTTCCAATGGAATTGCTGCGTCCTCGTCTTCACCGGTCGCGTTCCTGAAACGCAGATGTGCCTACAGCCGCACGCGATCCTAGGGCGATCA	0.17	0.06	1.19
1478	GGGGACCAGGTGCCGTAAGACCAGAACTTAAGCCGGACAGGCAGCGACAGCATTTCCAATGGAATTTCTCCTAGCTGCGTCCTCGTCTTCACCGGTCGCGTTCCTGAAACGCAGATGTGCCTACAGCCGCACGCGATCCTAGGGCGATCA	0.23	0.07	1.01
1479	GGGGACCAGGTGCCGTAAGGGCTGTCGATAAGCCGGACAGGCAGATTTCCAATGGAATTACAAGACTCTCCTAGCTGCGTCCTCGTCTTCACCGGTCGCGTTCCTGAAACGCAGATGTGCCTACAGCCGCACGCGATCCTAGGGCGATCA	0.24	0.08	1.04
1480	GGGGACCAGGTGCCGTAAGACTCGTGCCGAAGCCGGAATTTCCAATGGAATTCTGACAGACAAGACTCTCCTAGCTGCGTCCTCGTCTTCACCGGTCGCGTTCCTGAAACGCAGATGTGCCTACAGCCGCACGCGATCCTAGGGCGATCA	0.16	0.05	1.05
1481	GGGGACCAGGTGCCGTAAGACAGGATCTAAATTTCCAATGGAATTGACAGCCCTGACAGACAAGACTCTCCTAGCTGCGTCCTCGTCTTCACCGGTCGCGTTCCTGAAACGCAGATGTGCCTACAGCCGCACGCGATCCTAGGGCGATCA	0.16	0.04	1.24
1482	GGGGACCAGGTGCCGTAAGTCGAACAAAAAAGCCGGACAGGCAGCGACAGCCCTGACAGACAAGACTCTCCTAGCTGCGTCCTCGTCTTCACCGGTCGCGTTCCTGAAACGCAGATGTGCGGCTTCCACCACGCGATCCTAGGGCGATCA	0.15	0.08	1.32
1483	GGGGACCAGGTGCCGTAAGACCCAGGTTCAAGCCGGACAGGCAGCGACAGCCCTGACAGACAAGACTCTCCTAGCTGCGTCCTCGTCTTCACCGGTCGCGTTCCTGAAACGCAGGCTTCCACACAGCCGCACGCGATCCTAGGGCGATCA	0.2	0.07	1.25
1484	GGGGACCAGGTGCCGTAAGATACAAAATCAAGCCGGACAGGCAGCGACAGCCCTGACAGACAAGACTCTCCTAGCTGCGTCCTCGTCTTCACCGGTCGCGTTCCTGGGCTTCCACTGTGCCTACAGCCGCACGCGATCCTAGGGCGATCA	0.16	0.09	1.22
1485	GGGGACCAGGTGCCGTAAGGAATCGACACAAGCCGGACAGGCAGCGACAGCCCTGACAGACAAGACTCTCCTAGCTGCGTCCTCGTCTTCACCGGTCGCGGCTTCCACACGCAGATGTGCCTACAGCCGCACGCGATCCTAGGGCGATCA	0.23	0.06	1.23
1486	GGGGACCAGGTGCCGTAAGTCACGCTTCGAAGCCGGACAGGCAGCGACAGCCCTGACAGACAAGACTCTCCTAGCTGCGTCCTCGTCTTCACGGCTTCCACTCCTGAAACGCAGATGTGCCTACAGCCGCACGCGATCCTAGGGCGATCA	0.14	0.07	1.2
1487	GGGGACCAGGTGCCGTAAGCAAGCTCCTCAAGCCGGACAGGCAGCGACAGCCCTGACAGACAAGACTCTCCTAGCTGCGTCCTCGGGCTTCCACGTCGCGTTCCTGAAACGCAGATGTGCCTACAGCCGCACGCGATCCTAGGGCGATCA	0.18	0.09	1.23
1488	GGGGACCAGGTGCCGTAAGCGTATTCAAAAAGCCGGACAGGCAGCGACAGCCCTGACAGACAAGACTCTCCTAGCTGCGGCTTCCACTTCACCGGTCGCGTTCCTGAAACGCAGATGTGCCTACAGCCGCACGCGATCCTAGGGCGATCA	0.24	0.14	1.34
1489	GGGGACCAGGTGCCGTAAGATCTCGCGGCAAGCCGGACAGGCAGCGACAGCCCTGACAGACAAGACTCTCCGGCTTCCACCCTCGTCTTCACCGGTCGCGTTCCTGAAACGCAGATGTGCCTACAGCCGCACGCGATCCTAGGGCGATCA	0.19	0.09	1.25
1490	GGGGACCAGGTGCCGTAAGGTAGGCGCCGAAGCCGGACAGGCAGCGACAGCCCTGACAGACAAGGGCTTCCACGCTGCGTCCTCGTCTTCACCGGTCGCGTTCCTGAAACGCAGATGTGCCTACAGCCGCACGCGATCCTAGGGCGATCA	0.16	0.05	1.36
1491	GGGGACCAGGTGCCGTAAGTATGCAGTTGAAGCCGGACAGGCAGCGACAGCCCTGACGGCTTCCACTCTCCTAGCTGCGTCCTCGTCTTCACCGGTCGCGTTCCTGAAACGCAGATGTGCCTACAGCCGCACGCGATCCTAGGGCGATCA	0.35	0.07	1.23
1492	GGGGACCAGGTGCCGTAAGCTGAGCAGAGAAGCCGGACAGGCAGCGACAGGGCTTCCACACAAGACTCTCCTAGCTGCGTCCTCGTCTTCACCGGTCGCGTTCCTGAAACGCAGATGTGCCTACAGCCGCACGCGATCCTAGGGCGATCA	0.19	0.1	1.24
1493	GGGGACCAGGTGCCGTAAGTTCTGCGTAAAAGCCGGACAGGCAGGCTTCCACCTGACAGACAAGACTCTCCTAGCTGCGTCCTCGTCTTCACCGGTCGCGTTCCTGAAACGCAGATGTGCCTACAGCCGCACGCGATCCTAGGGCGATCA	0.19	0.06	1.33
1494	GGGGACCAGGTGCCGTAAGTCAGTACGAAAAGCCGGGGCTTCCACGACAGCCCTGACAGACAAGACTCTCCTAGCTGCGTCCTCGTCTTCACCGGTCGCGTTCCTGAAACGCAGATGTGCCTACAGCCGCACGCGATCCTAGGGCGATCA	0.23	0.06	1.29
1495	GGGGACCAGGTGCCGTAAGACATGCCCTAAAGCCGGACAGGCAGCGACAGCCCTGACAGACAAGACTCTCCTAGCTGCGTCCTCGTCTTCACCGGTCGCGTTCCTGAAACGCAGATGTGCTGACTCCGGCACGCGATCCTAGGGCGATCA	0.16	0.05	1.31
1496	GGGGACCAGGTGCCGTAAGGGCCAAACCCAAGCCGGACAGGCAGCGACAGCCCTGACAGACAAGACTCTCCTAGCTGCGTCCTCGTCTTCACCGGTCGCGTTCCTGAAACGCATGACTCCGGACAGCCGCACGCGATCCTAGGGCGATCA	0.2	0.07	1.18
1497	GGGGACCAGGTGCCGTAAGCCGCAACTGCAAGCCGGACAGGCAGCGACAGCCCTGACAGACAAGACTCTCCTAGCTGCGTCCTCGTCTTCACCGGTCGCGTTCCTGTGACTCCGGTGTGCCTACAGCCGCACGCGATCCTAGGGCGATCA	0.14	0.06	1.3
1498	GGGGACCAGGTGCCGTAAGTCTTGGGAGAAAGCCGGACAGGCAGCGACAGCCCTGACAGACAAGACTCTCCTAGCTGCGTCCTCGTCTTCACCGGTCGCTGACTCCGGACGCAGATGTGCCTACAGCCGCACGCGATCCTAGGGCGATCA	0.24	0.06	1.24
1499	GGGGACCAGGTGCCGTAAGCTGCTTGACGAAGCCGGACAGGCAGCGACAGCCCTGACAGACAAGACTCTCCTAGCTGCGTCCTCGTCTTCACTGACTCCGGTCCTGAAACGCAGATGTGCCTACAGCCGCACGCGATCCTAGGGCGATCA	0.2	0.03	1.28
1500	GGGGACCAGGTGCCGTAAGGCCACCTGCAAAGCCGGACAGGCAGCGACAGCCCTGACAGACAAGACTCTCCTAGCTGCGTCCTCGTGACTCCGGGTCGCGTTCCTGAAACGCAGATGTGCCTACAGCCGCACGCGATCCTAGGGCGATCA	0.23	0.17	1.43
1501	GGGGACCAGGTGCCGTAAGTATTGCATTTAAGCCGGACAGGCAGCGACAGCCCTGACAGACAAGACTCTCCTAGCTGCTGACTCCGGTTCACCGGTCGCGTTCCTGAAACGCAGATGTGCCTACAGCCGCACGCGATCCTAGGGCGATCA	0.23	0.05	1.32
1502	GGGGACCAGGTGCCGTAAGCACTGCGACGAAGCCGGACAGGCAGCGACAGCCCTGACAGACAAGACTCTCCTGACTCCGGCCTCGTCTTCACCGGTCGCGTTCCTGAAACGCAGATGTGCCTACAGCCGCACGCGATCCTAGGGCGATCA	0.18	0.12	1.2
1503	GGGGACCAGGTGCCGTAAGCGCAGTAAGTAAGCCGGACAGGCAGCGACAGCCCTGACAGACAAGTGACTCCGGGCTGCGTCCTCGTCTTCACCGGTCGCGTTCCTGAAACGCAGATGTGCCTACAGCCGCACGCGATCCTAGGGCGATCA	0.24	0.07	1.3
1504	GGGGACCAGGTGCCGTAAGGATTCTGAGGAAGCCGGACAGGCAGCGACAGCCCTGACTGACTCCGGTCTCCTAGCTGCGTCCTCGTCTTCACCGGTCGCGTTCCTGAAACGCAGATGTGCCTACAGCCGCACGCGATCCTAGGGCGATCA	0.24	0.06	1.35
1505	GGGGACCAGGTGCCGTAAGAAGGGCCCTTAAGCCGGACAGGCAGCGACAGTGACTCCGGACAAGACTCTCCTAGCTGCGTCCTCGTCTTCACCGGTCGCGTTCCTGAAACGCAGATGTGCCTACAGCCGCACGCGATCCTAGGGCGATCA	0.18	0.06	1.26
1506	GGGGACCAGGTGCCGTAAGACGTTAACTAAAGCCGGACAGGCATGACTCCGGCTGACAGACAAGACTCTCCTAGCTGCGTCCTCGTCTTCACCGGTCGCGTTCCTGAAACGCAGATGTGCCTACAGCCGCACGCGATCCTAGGGCGATCA	0.18	0.07	1.2
1507	GGGGACCAGGTGCCGTAAGTGAATCAGCTAAGCCGGTGACTCCGGGACAGCCCTGACAGACAAGACTCTCCTAGCTGCGTCCTCGTCTTCACCGGTCGCGTTCCTGAAACGCAGATGTGCCTACAGCCGCACGCGATCCTAGGGCGATCA	0.19	0.06	1.24
1508	GGGGACCAGGTGCCGTAAGCTCCCAGACCGCACTAAATCGGAACCCTAAAGGGAGCCCCCGATTTAGAGCTTGACGGGGAAAGCCGGCGAACGTGGCGAGAAAGGAAGGGAAGAAAGCGAGTCACGTGAGAAGCGATCCTAGGGCGATCA	0.13	0.09	1
1509	GGGGACCAGGTGCCGTAAGACTGCGAAAAGCACTAAATCGGAACCCTAAAGGGAGCCCCCGATTTAGAGCTTGACGGGGAAAGCCGGCGAACGTGGCGAGAAAGGAGTCACGTGAAGCGCCACCTAGCGGAAGCGATCCTAGGGCGATCA	NaN	0.39	0.87
1510	GGGGACCAGGTGCCGTAAGTACAATACAGGCACTAAATCGGAACCCTAAAGGGAGCCCCCGATTTAGAGCTTGACGGGGAAAGCCGGCGAAAGTCACGTGAAAGGAAGGGAAGAAAGCGCCACCTAGCGGAAGCGATCCTAGGGCGATCA	NaN	NaN	1.34
1511	GGGGACCAGGTGCCGTAAGGTTGTCTATGGCACTAAATCGGAACCCTAAAGGGAGCCCCCGATTTAGAGCTTGACGGAGTCACGTGACGAACGTGGCGAGAAAGGAAGGGAAGAAAGCGCCACCTAGCGGAAGCGATCCTAGGGCGATCA	NaN	0.08	1.23
1512	GGGGACCAGGTGCCGTAAGAAGTATTGTCGCACTAAATCGGAACCCTAAAGGGAGCCCCCGATAGTCACGTGAACGGGGAAAGCCGGCGAACGTGGCGAGAAAGGAAGGGAAGAAAGCGCCACCTAGCGGAAGCGATCCTAGGGCGATCA	NaN	0.13	1.38
1513	GGGGACCAGGTGCCGTAAGAATTCATGGGGCACTAAATCGGAACCCTAAAGTCACGTGACGATTTAGAGCTTGACGGGGAAAGCCGGCGAACGTGGCGAGAAAGGAAGGGAAGAAAGCGCCACCTAGCGGAAGCGATCCTAGGGCGATCA	NaN	0.08	1.07
1514	GGGGACCAGGTGCCGTAAGTGTCCAAGAAGCACTAAGTCACGTGACTAAAGGGAGCCCCCGATTTAGAGCTTGACGGGGAAAGCCGGCGAACGTGGCGAGAAAGGAAGGGAAGAAAGCGCCACCTAGCGGAAGCGATCCTAGGGCGATCA	0.36	0.1	1.12
1515	GGGGACCAGGTGCCGTAAGGGTGTAATCCGCACTAAATCGGAACCCTAAAGGGAGCCCCCGATTTAGAGCTTGACGGGGAAAGCCGGCGAACGTGGCGAGAAAGGAAGGGAAGAAAGCGCCGCCGGCGGGAAGCGATCCTAGGGCGATCA	0.27	0.04	1.13
1516	GGGGACCAGGTGCCGTAAGCTCTAGCGACGCACTAAATCGGAACCCTAAAGGGAGCCCCCGATTTAGAGCTTGACGGGGAAAGCCGGCGAACGTGGCGAGAAAGGCCGCCGGCGGAGCGCCACCTAGCGGAAGCGATCCTAGGGCGATCA	0.2	0.17	1.03
1517	GGGGACCAGGTGCCGTAAGCTAAGTGTTAGCACTAAATCGGAACCCTAAAGGGAGCCCCCGATTTAGAGCTTGACGGGGAAAGCCGGCGAACCGCCGGCGGAAGGAAGGGAAGAAAGCGCCACCTAGCGGAAGCGATCCTAGGGCGATCA	NaN	NaN	1.21
1518	GGGGACCAGGTGCCGTAAGTGAGCTCGTGGCACTAAATCGGAACCCTAAAGGGAGCCCCCGATTTAGAGCTTGACGGCCGCCGGCGGCGAACGTGGCGAGAAAGGAAGGGAAGAAAGCGCCACCTAGCGGAAGCGATCCTAGGGCGATCA	0.28	0.09	1.14
1519	GGGGACCAGGTGCCGTAAGACGGGCGTATGCACTAAATCGGAACCCTAAAGGGAGCCCCCGATCCGCCGGCGGACGGGGAAAGCCGGCGAACGTGGCGAGAAAGGAAGGGAAGAAAGCGCCACCTAGCGGAAGCGATCCTAGGGCGATCA	NaN	0.05	1.25
1520	GGGGACCAGGTGCCGTAAGACAGACAGATGCACTAAATCGGAACCCTAACCGCCGGCGGCGATTTAGAGCTTGACGGGGAAAGCCGGCGAACGTGGCGAGAAAGGAAGGGAAGAAAGCGCCACCTAGCGGAAGCGATCCTAGGGCGATCA	0.33	0.46	1.17
1521	GGGGACCAGGTGCCGTAAGGAAATCGTTTGCACTACCGCCGGCGGCTAAAGGGAGCCCCCGATTTAGAGCTTGACGGGGAAAGCCGGCGAACGTGGCGAGAAAGGAAGGGAAGAAAGCGCCACCTAGCGGAAGCGATCCTAGGGCGATCA	0.25	0.08	1.11
1522	GGGGACCAGGTGCCGTAAGAACTGCCTGAAAGCCGGACAGGCAGCGACAGCCCTGACAGACAAGACTCTCCTAGCTGCGTCCTCGTCTTCACCGGTCGCGTTCCTGAAACGCAGATGTGAGTCACGTGACACGCGATCCTAGGGCGATCA	1.31	0.07	1.26
1523	GGGGACCAGGTGCCGTAAGAACGCTCCCGAAGCCGGACAGGCAGCGACAGCCCTGACAGACAAGACTCTCCTAGCTGCGTCCTCGTCTTCACCGGTCGCGTTCCTAGTCACGTGATGTGCCTACAGCCGCACGCGATCCTAGGGCGATCA	0.19	0.07	1.28
1524	GGGGACCAGGTGCCGTAAGCTTACCCTGCAAGCCGGACAGGCAGCGACAGCCCTGACAGACAAGACTCTCCTAGCTGCGTCCTCGTCTTCAAGTCACGTGATCCTGAAACGCAGATGTGCCTACAGCCGCACGCGATCCTAGGGCGATCA	0.16	0.05	1.27
1525	GGGGACCAGGTGCCGTAAGGAGCACGGATAAGCCGGACAGGCAGCGACAGCCCTGACAGACAAGACTCTCCTAGCTGAGTCACGTGATTCACCGGTCGCGTTCCTGAAACGCAGATGTGCCTACAGCCGCACGCGATCCTAGGGCGATCA	0.37	0.06	1.26
1526	GGGGACCAGGTGCCGTAAGCATACAGAAAAAGCCGGACAGGCAGCGACAGCCCTGACAGACAAAGTCACGTGAGCTGCGTCCTCGTCTTCACCGGTCGCGTTCCTGAAACGCAGATGTGCCTACAGCCGCACGCGATCCTAGGGCGATCA	0.18	0.08	1.09
1527	GGGGACCAGGTGCCGTAAGTCGCAAGATAAAGCCGGACAGGCAGCGACAAGTCACGTGAACAAGACTCTCCTAGCTGCGTCCTCGTCTTCACCGGTCGCGTTCCTGAAACGCAGATGTGCCTACAGCCGCACGCGATCCTAGGGCGATCA	0.29	0.06	1.22
1528	GGGGACCAGGTGCCGTAAGCTTTCTGCGCAAGCCGAGTCACGTGAGACAGCCCTGACAGACAAGACTCTCCTAGCTGCGTCCTCGTCTTCACCGGTCGCGTTCCTGAAACGCAGATGTGCCTACAGCCGCACGCGATCCTAGGGCGATCA	0.18	0.05	1.28
1529	GGGGACCAGGTGCCGTAAGCCCTCTCAACAAGCCGGACAGGCAGCGACAGCCCTGACAGACAAGACTCTCCTAGCTGCGTCCTCGTCTTCACCGGTCGCGTTCCTGAAACGCAGATGTGCCGCCGGCGGCACGCGATCCTAGGGCGATCA	0.13	0.06	1.17
1530	GGGGACCAGGTGCCGTAAGGAGTGCTTTAAAGCCGGACAGGCAGCGACAGCCCTGACAGACAAGACTCTCCTAGCTGCGTCCTCGTCTTCACCGGTCGCGTTCCTCCGCCGGCGGTGTGCCTACAGCCGCACGCGATCCTAGGGCGATCA	0.22	0.08	1.34
1531	GGGGACCAGGTGCCGTAAGAGTTCATTAGAAGCCGGACAGGCAGCGACAGCCCTGACAGACAAGACTCTCCTAGCTGCGTCCTCGTCTTCACCGCCGGCGGTCCTGAAACGCAGATGTGCCTACAGCCGCACGCGATCCTAGGGCGATCA	0.22	0.09	1.39
1532	GGGGACCAGGTGCCGTAAGTCTAGGCTGGAAGCCGGACAGGCAGCGACAGCCCTGACAGACAAGACTCTCCTAGCTGCCGCCGGCGGTTCACCGGTCGCGTTCCTGAAACGCAGATGTGCCTACAGCCGCACGCGATCCTAGGGCGATCA	0.16	0.06	1.35
1533	GGGGACCAGGTGCCGTAAGGAGACGCTGCAAGCCGGACAGGCAGCGACAGCCCTGACAGACAACCGCCGGCGGGCTGCGTCCTCGTCTTCACCGGTCGCGTTCCTGAAACGCAGATGTGCCTACAGCCGCACGCGATCCTAGGGCGATCA	0.18	0.08	1.3
1534	GGGGACCAGGTGCCGTAAGTCGAAATCTGAAGCCGGACAGGCAGCGACACCGCCGGCGGACAAGACTCTCCTAGCTGCGTCCTCGTCTTCACCGGTCGCGTTCCTGAAACGCAGATGTGCCTACAGCCGCACGCGATCCTAGGGCGATCA	0.25	0.08	1.09
1535	GGGGACCAGGTGCCGTAAGGCGTTGGCTCAAGCCGCCGCCGGCGGGACAGCCCTGACAGACAAGACTCTCCTAGCTGCGTCCTCGTCTTCACCGGTCGCGTTCCTGAAACGCAGATGTGCCTACAGCCGCACGCGATCCTAGGGCGATCA	0.16	0.05	1.25
1536	GGGGACCAGGTGCCGTAAGCCGGTCCAGTGCACTAAATCGGAACCCTAAAGGGAGCCCCCGATTTAGAGCTTGACGGGGAAAGCCGGCGAACGTGGCGAGAAAGGAAGGGAAGAAAGCGCCACGCGAAAGAAGCGATCCTAGGGCGATCA	0.06	0.06	1.04
1537	GGGGACCAGGTGCCGTAAGTAACGGTGTAGCACTAAATCGGAACCCTAAAGGGAGCCCCCGATTTAGAGCTTGACGGGGAAAGCCGGCGAACGTGGCGAGAAAGGAAGCGCGAAAAGCGCCACCTAGCGGAAGCGATCCTAGGGCGATCA	NaN	0.08	1.15
1538	GGGGACCAGGTGCCGTAAGAGACACAGCCGCACTAAATCGGAACCCTAAAGGGAGCCCCCGATTTAGAGCTTGACGGGGAAAGCCGGCGAACGTGGCGAGACGCGAAAGGAAGAAAGCGCCACCTAGCGGAAGCGATCCTAGGGCGATCA	0.24	0.06	1.08
1539	GGGGACCAGGTGCCGTAAGGTTCGTAAATGCACTAAATCGGAACCCTAAAGGGAGCCCCCGATTTAGAGCTTGACGGGGAAAGCCGGCGAACGTCGCGAAAAAGGAAGGGAAGAAAGCGCCACCTAGCGGAAGCGATCCTAGGGCGATCA	0.36	0.09	0.97
1540	GGGGACCAGGTGCCGTAAGGCGGGCCAACGCACTAAATCGGAACCCTAAAGGGAGCCCCCGATTTAGAGCTTGACGGGGAAAGCCGGCGCGAAAGGCGAGAAAGGAAGGGAAGAAAGCGCCACCTAGCGGAAGCGATCCTAGGGCGATCA	NaN	0.11	0.93
1541	GGGGACCAGGTGCCGTAAGGCAGTGTAATGCACTAAATCGGAACCCTAAAGGGAGCCCCCGATTTAGAGCTTGACGGGGACGCGAAACGAACGTGGCGAGAAAGGAAGGGAAGAAAGCGCCACCTAGCGGAAGCGATCCTAGGGCGATCA	NaN	NaN	1.04
1542	GGGGACCAGGTGCCGTAAGCTGGACTCCCGCACTAAATCGGAACCCTAAAGGGAGCCCCCGATTTACGCGAAAACGGGGAAAGCCGGCGAACGTGGCGAGAAAGGAAGGGAAGAAAGCGCCACCTAGCGGAAGCGATCCTAGGGCGATCA	0.12	0.05	0.88
1543	GGGGACCAGGTGCCGTAAGCCAGGCTGTAGCACTAAATCGGAACCCTAAAGGCGCGAAACGATTTAGAGCTTGACGGGGAAAGCCGGCGAACGTGGCGAGAAAGGAAGGGAAGAAAGCGCCACCTAGCGGAAGCGATCCTAGGGCGATCA	0.27	0.67	1
1544	GGGGACCAGGTGCCGTAAGATAGAGCATGGCACTAAATCGCGAAACTAAAGGGAGCCCCCGATTTAGAGCTTGACGGGGAAAGCCGGCGAACGTGGCGAGAAAGGAAGGGAAGAAAGCGCCACCTAGCGGAAGCGATCCTAGGGCGATCA	NaN	0.13	1.04
1545	GGGGACCAGGTGCCGTAAGCAACGTTAGTAAGCCGGACAGGCAGCGACAGCCCTGACAGACAAGACTCTCCTAGCTGCGTCCTCGTCTTCACCGGTCGCGTTCCTGAAACGCAGATGTGCCTCGCGAAACACGCGATCCTAGGGCGATCA	0.14	0.08	1.24
1546	GGGGACCAGGTGCCGTAAGAGCATTTTCGAAGCCGGACAGGCAGCGACAGCCCTGACAGACAAGACTCTCCTAGCTGCGTCCTCGTCTTCACCGGTCGCGTTCCTGAACGCGAAATGTGCCTACAGCCGCACGCGATCCTAGGGCGATCA	0.18	0.08	1.14
1547	GGGGACCAGGTGCCGTAAGACGGTCATGAAAGCCGGACAGGCAGCGACAGCCCTGACAGACAAGACTCTCCTAGCTGCGTCCTCGTCTTCACCGGTCGCGTCGCGAAAACGCAGATGTGCCTACAGCCGCACGCGATCCTAGGGCGATCA	0.19	0.05	1.28
1548	GGGGACCAGGTGCCGTAAGCTAACTAATGAAGCCGGACAGGCAGCGACAGCCCTGACAGACAAGACTCTCCTAGCTGCGTCCTCGTCTTCACCGCGCGAAATCCTGAAACGCAGATGTGCCTACAGCCGCACGCGATCCTAGGGCGATCA	0.24	0.05	1.2
1549	GGGGACCAGGTGCCGTAAGCGTTCGCTGCAAGCCGGACAGGCAGCGACAGCCCTGACAGACAAGACTCTCCTAGCTGCGTCCTCGTCCGCGAAAGTCGCGTTCCTGAAACGCAGATGTGCCTACAGCCGCACGCGATCCTAGGGCGATCA	0.22	0.04	1.21
1550	GGGGACCAGGTGCCGTAAGCTGAATGCGCAAGCCGGACAGGCAGCGACAGCCCTGACAGACAAGACTCTCCTAGCTGCGTCGCGAAATTCACCGGTCGCGTTCCTGAAACGCAGATGTGCCTACAGCCGCACGCGATCCTAGGGCGATCA	0.21	0.05	1.16
1551	GGGGACCAGGTGCCGTAAGGCAATGATCCAAGCCGGACAGGCAGCGACAGCCCTGACAGACAAGACCGCGAAAGCTGCGTCCTCGTCTTCACCGGTCGCGTTCCTGAAACGCAGATGTGCCTACAGCCGCACGCGATCCTAGGGCGATCA	0.26	0.05	1.3
1552	GGGGACCAGGTGCCGTAAGCCGGATTGAGAAGCCGGACAGGCAGCGACAGCCCGCGAAAACAAGACTCTCCTAGCTGCGTCCTCGTCTTCACCGGTCGCGTTCCTGAAACGCAGATGTGCCTACAGCCGCACGCGATCCTAGGGCGATCA	0.19	0.06	1.23
1553	GGGGACCAGGTGCCGTAAGCCTAACCGGGAAGCCGGACCGCGAAAGACAGCCCTGACAGACAAGACTCTCCTAGCTGCGTCCTCGTCTTCACCGGTCGCGTTCCTGAAACGCAGATGTGCCTACAGCCGCACGCGATCCTAGGGCGATCA	0.16	0.06	1.19
1554	GGGGACCAGGTGCCGTAAGGGACAAACTGGCACTAAATCGGAACCCTAAAGGGAGCCCCCGATTTAGAGCTTGACGGGGAAAGCCGGCGAACGTGGCGAGAAAGGAAGGGAAGAAAGCGTCGGAAAATCGAAGCGATCCTAGGGCGATCA	0.2	0.19	0.86
1555	GGGGACCAGGTGCCGTAAGCCAACCAGTGGCACTAAATCGGAACCCTAAAGGGAGCCCCCGATTTAGAGCTTGACGGGGAAAGCCGGCGAACGTGGCGAGAAAGGTCGGAAAATCAGCGCCACCTAGCGGAAGCGATCCTAGGGCGATCA	0.28	1	0.89
1556	GGGGACCAGGTGCCGTAAGGACTTTACCGGCACTAAATCGGAACCCTAAAGGGAGCCCCCGATTTAGAGCTTGACGGTCGGAAAATCCGAACGTGGCGAGAAAGGAAGGGAAGAAAGCGCCACCTAGCGGAAGCGATCCTAGGGCGATCA	0.45	0.19	0.93
1557	GGGGACCAGGTGCCGTAAGAGAGAGGGCGGCACTAAATCGGAACCCTAAAGGGAGCCCCCGAGTCGGAAAATCACGGGGAAAGCCGGCGAACGTGGCGAGAAAGGAAGGGAAGAAAGCGCCACCTAGCGGAAGCGATCCTAGGGCGATCA	NaN	0.08	0.85
1558	GGGGACCAGGTGCCGTAAGAGGTTGTTACGCACTAAATCGGAACCCTAGTCGGAAAATCCGATTTAGAGCTTGACGGGGAAAGCCGGCGAACGTGGCGAGAAAGGAAGGGAAGAAAGCGCCACCTAGCGGAAGCGATCCTAGGGCGATCA	NaN	0.07	0.97
1559	GGGGACCAGGTGCCGTAAGTGGCTACAGTGCACTGTCGGAAAATCCTAAAGGGAGCCCCCGATTTAGAGCTTGACGGGGAAAGCCGGCGAACGTGGCGAGAAAGGAAGGGAAGAAAGCGCCACCTAGCGGAAGCGATCCTAGGGCGATCA	0.36	0.15	1.11
1560	GGGGACCAGGTGCCGTAAGGTGTGCTCCCAAGCCGGACAGGCAGCGACAGCCCTGACAGACAAGACTCTCCTAGCTGCGTCCTCGTCTTCACCGGTCGCGTTCCTGAAACGCAGATGTGTCGGAAAATCCACGCGATCCTAGGGCGATCA	0.16	0.05	1.2
1561	GGGGACCAGGTGCCGTAAGGCAGGTGTTCAAGCCGGACAGGCAGCGACAGCCCTGACAGACAAGACTCTCCTAGCTGCGTCCTCGTCTTCACCGGTCGCGTTCCGTCGGAAAATCTGTGCCTACAGCCGCACGCGATCCTAGGGCGATCA	0.21	0.07	1.34
1562	GGGGACCAGGTGCCGTAAGGCACGGGCTGAAGCCGGACAGGCAGCGACAGCCCTGACAGACAAGACTCTCCTAGCTGTCGGAAAATCTTCACCGGTCGCGTTCCTGAAACGCAGATGTGCCTACAGCCGCACGCGATCCTAGGGCGATCA	0.15	0.08	1.1
1563	GGGGACCAGGTGCCGTAAGGTGCAGCATAAAGCCGGACAGGCAGCGACAGCCCTGACAGACAGTCGGAAAATCGCTGCGTCCTCGTCTTCACCGGTCGCGTTCCTGAAACGCAGATGTGCCTACAGCCGCACGCGATCCTAGGGCGATCA	0.25	0.07	1.1
1564	GGGGACCAGGTGCCGTAAGAATGGTTCTAAAGCCGGACAGGCAGCGACGTCGGAAAATCACAAGACTCTCCTAGCTGCGTCCTCGTCTTCACCGGTCGCGTTCCTGAAACGCAGATGTGCCTACAGCCGCACGCGATCCTAGGGCGATCA	0.19	0.08	1.19
1565	GGGGACCAGGTGCCGTAAGCAGAATCTTCAAGCCGTCGGAAAATCGACAGCCCTGACAGACAAGACTCTCCTAGCTGCGTCCTCGTCTTCACCGGTCGCGTTCCTGAAACGCAGATGTGCCTACAGCCGCACGCGATCCTAGGGCGATCA	0.17	0.09	1.28
1566	GGGGACCAGGTGCCGTAAGTAAGCAGCATGCACTAAATCGGAACCCTAAAGGGAGCCCCCGATTTAGAGCTTGACGGGGAAAGCCGGCGAACGTGGCGAGAAAGGAAGGGAAGAAAGATTTCCAATGGAATTGCGATCCTAGGGCGATCA	0.24	0.13	1.1
1567	GGGGACCAGGTGCCGTAAGTAGCCTGTAGAAGCCGGACAGGCAGCGACAGCCCTGACAGACAAGACTCTCCTAGCTGCGTCCTCGTCTTCACCGGTCGCGTTCCTGAAACGCAGATGATTTCCAATGGAATTGCGATCCTAGGGCGATCA	0.18	0.06	1.08
1568	GGGGACCAGGTGCCGTAAGATACGCCTACGCACTAAATCGGAACCCTAAAGGGAGCCCCCGATTTAGAGCTTGACGGGGAAAGCCGGCGAACGTGGCGAGAAAGGAAGGGAAGAAAGCATGTATGGGTGGAAGCGATCCTAGGGCGATCA	0.14	0.09	1.1
1569	GGGGACCAGGTGCCGTAAGATCCATTACAGCACTAAATCGGAACCCTAAAGGGAGCCCCCGATTTAGAGCTTGACGGGGAAAGCCGGCGAACGTGGCGAGAAAGGAAGGGAATGTATGGGTGCCTAGCGGAAGCGATCCTAGGGCGATCA	NaN	0.14	1.16
1570	GGGGACCAGGTGCCGTAAGCTGAAATCAGGCACTAAATCGGAACCCTAAAGGGAGCCCCCGATTTAGAGCTTGACGGGGAAAGCCGGCGAACGTGGCGAGAAAGATGTATGGGTGAGCGCCACCTAGCGGAAGCGATCCTAGGGCGATCA	NaN	0.06	1.19
1571	GGGGACCAGGTGCCGTAAGCAGGGACAACGCACTAAATCGGAACCCTAAAGGGAGCCCCCGATTTAGAGCTTGACGGGGAAAGCCGGCGAACGTGGCATGTATGGGTGGGAAGAAAGCGCCACCTAGCGGAAGCGATCCTAGGGCGATCA	NaN	0.08	1.24
1572	GGGGACCAGGTGCCGTAAGTCAAGAAGCTGCACTAAATCGGAACCCTAAAGGGAGCCCCCGATTTAGAGCTTGACGGGGAAAGCCGGCGAATGTATGGGTGAAGGAAGGGAAGAAAGCGCCACCTAGCGGAAGCGATCCTAGGGCGATCA	NaN	0.11	1.06
1573	GGGGACCAGGTGCCGTAAGTCCTTAGCAAGCACTAAATCGGAACCCTAAAGGGAGCCCCCGATTTAGAGCTTGACGGGGAAAGATGTATGGGTGGGCGAGAAAGGAAGGGAAGAAAGCGCCACCTAGCGGAAGCGATCCTAGGGCGATCA	NaN	0.08	0.91
1574	GGGGACCAGGTGCCGTAAGATCACGCTTGGCACTAAATCGGAACCCTAAAGGGAGCCCCCGATTTAGAGCTTGACGATGTATGGGTGCGAACGTGGCGAGAAAGGAAGGGAAGAAAGCGCCACCTAGCGGAAGCGATCCTAGGGCGATCA	0.09	0.11	1.18
1575	GGGGACCAGGTGCCGTAAGCGACCATGCGGCACTAAATCGGAACCCTAAAGGGAGCCCCCGATTTAGAGATGTATGGGTGAAGCCGGCGAACGTGGCGAGAAAGGAAGGGAAGAAAGCGCCACCTAGCGGAAGCGATCCTAGGGCGATCA	0.1	0.1	1.11
1576	GGGGACCAGGTGCCGTAAGTACAAAGGTTGCACTAAATCGGAACCCTAAAGGGAGCCCCCGAATGTATGGGTGACGGGGAAAGCCGGCGAACGTGGCGAGAAAGGAAGGGAAGAAAGCGCCACCTAGCGGAAGCGATCCTAGGGCGATCA	0.22	0.07	1.29
1577	GGGGACCAGGTGCCGTAAGGAAATGCTCGGCACTAAATCGGAACCCTAAAGGGAGATGTATGGGTGGAGCTTGACGGGGAAAGCCGGCGAACGTGGCGAGAAAGGAAGGGAAGAAAGCGCCACCTAGCGGAAGCGATCCTAGGGCGATCA	NaN	0.07	1.15
1578	GGGGACCAGGTGCCGTAAGGCCACCATTTGCACTAAATCGGAACCCTAATGTATGGGTGCGATTTAGAGCTTGACGGGGAAAGCCGGCGAACGTGGCGAGAAAGGAAGGGAAGAAAGCGCCACCTAGCGGAAGCGATCCTAGGGCGATCA	0.34	0.1	1.11
1579	GGGGACCAGGTGCCGTAAGACTGCTTTGGGCACTAAATCGGATGTATGGGTGGAGCCCCCGATTTAGAGCTTGACGGGGAAAGCCGGCGAACGTGGCGAGAAAGGAAGGGAAGAAAGCGCCACCTAGCGGAAGCGATCCTAGGGCGATCA	0.14	0.12	0.87
1580	GGGGACCAGGTGCCGTAAGTAAGTCGCTAGCACTATGTATGGGTGCTAAAGGGAGCCCCCGATTTAGAGCTTGACGGGGAAAGCCGGCGAACGTGGCGAGAAAGGAAGGGAAGAAAGCGCCACCTAGCGGAAGCGATCCTAGGGCGATCA	NaN	0.28	1.25
1581	GGGGACCAGGTGCCGTAAGCCATGTAGTGAAGCCGGACAGGCAGCGACAGCCCTGACAGACAAGACTCTCCTAGCTGCGTCCTCGTCTTCACCGGTCGCGTTCCTGAAACGCAGATGTATGTATGGGTGCACGCGATCCTAGGGCGATCA	0.15	0.06	1.12
1582	GGGGACCAGGTGCCGTAAGTAGTTGGCCCAAGCCGGACAGGCAGCGACAGCCCTGACAGACAAGACTCTCCTAGCTGCGTCCTCGTCTTCACCGGTCGCGTTCCTGAAACGATGTATGGGTGACAGCCGCACGCGATCCTAGGGCGATCA	0.19	0.05	1.16
1583	GGGGACCAGGTGCCGTAAGAAGCACATGCAAGCCGGACAGGCAGCGACAGCCCTGACAGACAAGACTCTCCTAGCTGCGTCCTCGTCTTCACCGGTCGCGTTCCATGTATGGGTGTGTGCCTACAGCCGCACGCGATCCTAGGGCGATCA	0.15	0.06	1.2
1584	GGGGACCAGGTGCCGTAAGCCGCTGCTGTAAGCCGGACAGGCAGCGACAGCCCTGACAGACAAGACTCTCCTAGCTGCGTCCTCGTCTTCACCGGTCATGTATGGGTGACGCAGATGTGCCTACAGCCGCACGCGATCCTAGGGCGATCA	0.17	0.04	1.13
1585	GGGGACCAGGTGCCGTAAGTTTGCTAGGAAAGCCGGACAGGCAGCGACAGCCCTGACAGACAAGACTCTCCTAGCTGCGTCCTCGTCTTCATGTATGGGTGTCCTGAAACGCAGATGTGCCTACAGCCGCACGCGATCCTAGGGCGATCA	0.25	0.05	1.25
1586	GGGGACCAGGTGCCGTAAGCAAGGACGGCAAGCCGGACAGGCAGCGACAGCCCTGACAGACAAGACTCTCCTAGCTGCGTCCTATGTATGGGTGGTCGCGTTCCTGAAACGCAGATGTGCCTACAGCCGCACGCGATCCTAGGGCGATCA	0.23	0.04	1.19
1587	GGGGACCAGGTGCCGTAAGCTAGCCTTCGAAGCCGGACAGGCAGCGACAGCCCTGACAGACAAGACTCTCCTAGCTATGTATGGGTGTTCACCGGTCGCGTTCCTGAAACGCAGATGTGCCTACAGCCGCACGCGATCCTAGGGCGATCA	0.23	0.06	1.29
1588	GGGGACCAGGTGCCGTAAGAACAGCACAGAAGCCGGACAGGCAGCGACAGCCCTGACAGACAAGACTCTATGTATGGGTGCCTCGTCTTCACCGGTCGCGTTCCTGAAACGCAGATGTGCCTACAGCCGCACGCGATCCTAGGGCGATCA	0.22	0.04	1.23
1589	GGGGACCAGGTGCCGTAAGAGCGGTGGAGAAGCCGGACAGGCAGCGACAGCCCTGACAGACAATGTATGGGTGGCTGCGTCCTCGTCTTCACCGGTCGCGTTCCTGAAACGCAGATGTGCCTACAGCCGCACGCGATCCTAGGGCGATCA	0.15	0.09	1.27
1590	GGGGACCAGGTGCCGTAAGGCGCCCATGGAAGCCGGACAGGCAGCGACAGCCCTGATGTATGGGTGTCTCCTAGCTGCGTCCTCGTCTTCACCGGTCGCGTTCCTGAAACGCAGATGTGCCTACAGCCGCACGCGATCCTAGGGCGATCA	0.25	0.06	1.41
1591	GGGGACCAGGTGCCGTAAGACTCTGAGAGAAGCCGGACAGGCAGCGACATGTATGGGTGACAAGACTCTCCTAGCTGCGTCCTCGTCTTCACCGGTCGCGTTCCTGAAACGCAGATGTGCCTACAGCCGCACGCGATCCTAGGGCGATCA	0.28	0.07	1.29
1592	GGGGACCAGGTGCCGTAAGGCGGTCCTTAAAGCCGGACAGGATGTATGGGTGCTGACAGACAAGACTCTCCTAGCTGCGTCCTCGTCTTCACCGGTCGCGTTCCTGAAACGCAGATGTGCCTACAGCCGCACGCGATCCTAGGGCGATCA	0.15	0.07	1.21
1593	GGGGACCAGGTGCCGTAAGCACCGTCTAAAAGCCATGTATGGGTGGACAGCCCTGACAGACAAGACTCTCCTAGCTGCGTCCTCGTCTTCACCGGTCGCGTTCCTGAAACGCAGATGTGCCTACAGCCGCACGCGATCCTAGGGCGATCA	0.16	0.06	1.3
1594	GGGGACCAGGTGCCGTAAGCTGTCGACCCGCACTAAATCGGAACCCTAAAGGGAGCCCCCGATTTAGAGCTTGACGGGGAAAGCCGGCGAACGTGGCGAGAAAGGAAGACGCAAAATTTTTTTTTTTTTTTAGCGATCCTAGGGCGATCA	0.2	0.09	1
1595	GGGGACCAGGTGCCGTAAGACTCAGCAGGGCACTAAATCGGAACCCTAAAGGGAGCCCCCGATTTAGAGCTTGACGGGGTTTTTTTTTTTTTTTGGCGAGAAAGGAAGACGCAAAAGCGCCACCTAGCGGAAGCGATCCTAGGGCGATCA	0.11	0.08	0.55
1596	GGGGACCAGGTGCCGTAAGAGTTACTCGCGCACTAAATCGGAACCCTAAAGGGTTTTTTTTTTTTTTTGCTTGACGGGGAAAGCCGGCGAACGTGGCGAGAAAGGAAGACGCAAAAGCGCCACCTAGCGGAAGCGATCCTAGGGCGATCA	0.3	0.09	0.81
1597	GGGGACCAGGTGCCGTAAGTAGTCGCCCAGCACTAAATCGGAACCCTAAAGGGAGCCCCCGATTTAGAGCTTGACGGGGAAAGCCGGACGCAAAGGCGAGAAAGGAAGGGAAGAAATTTTTTTTTTTTTTTAGCGATCCTAGGGCGATCA	NaN	0.1	0.84
1598	GGGGACCAGGTGCCGTAAGAGGTCTGTTGGCACTAAATCGGAACCCTAAAGGGTTTTTTTTTTTTTTTGCTTGACGGGGAAAGCCGGACGCAAAGGCGAGAAAGGAAGGGAAGAAAGCGCCACCTAGCGGAAGCGATCCTAGGGCGATCA	0.32	0.06	0.72
1599	GGGGACCAGGTGCCGTAAGCACACACTGGGCACTAAATCGGAACCCTAAAGGGAGCCCCCGATTTAGAGCTTGACGGGGAAAGCCGGCGAACGTGGCGAGAAAGCACCCATACATATTTTTTTTTTTTTTTAGCGATCCTAGGGCGATCA	0.21	0.12	0.98
1600	GGGGACCAGGTGCCGTAAGCCACTTCGGTGCACTAAATCGGAACCCTAAAGGGAGCCCCCGATTTAGAGCTTGACGGGGTTTTTTTTTTTTTTTGGCGAGAAAGCACCCATACATAGCGCCACCTAGCGGAAGCGATCCTAGGGCGATCA	0.17	0.09	0.5
1601	GGGGACCAGGTGCCGTAAGTCGACTGTCAGCACTAAATCGGAACCCTAAAGGGTTTTTTTTTTTTTTTGCTTGACGGGGAAAGCCGGCGAACGTGGCGAGAAAGCACCCATACATAGCGCCACCTAGCGGAAGCGATCCTAGGGCGATCA	0.32	0.2	0.91
1602	GGGGACCAGGTGCCGTAAGTGCTCATAGTGCACTAAATCGGAACCCTAAAGGGAGCCCCCGATTTAGAGCTTGACGGGGAAAGCACCCATACATGGCGAGAAAGGAAGGGAAGAAATTTTTTTTTTTTTTTAGCGATCCTAGGGCGATCA	NaN	0.07	0.83
1603	GGGGACCAGGTGCCGTAAGTGCGGTTGCAGCACTAAATCGGAACCCTAAAGGGTTTTTTTTTTTTTTTGCTTGACGGGGAAAGCACCCATACATGGCGAGAAAGGAAGGGAAGAAAGCGCCACCTAGCGGAAGCGATCCTAGGGCGATCA	0.43	0.11	0.84
1604	GGGGACCAGGTGCCGTAAGAGAGTCGCCTGCACTAAATCGGAACCCTAAAGGGAGCCCCCGATTTAGAGCTTGACGGGGAAAGCCGGCGAACGTGGCGAGAAAAAACTGTGGCGCATTTTTTTTTTTTTTTAGCGATCCTAGGGCGATCA	0.23	0.11	0.94
1605	GGGGACCAGGTGCCGTAAGCCTAAACTGAGCACTAAATCGGAACCCTAAAGGGAGCCCCCGATTTAGAGCTTGACGGGGTTTTTTTTTTTTTTTGGCGAGAAAAAACTGTGGCGCAGCGCCACCTAGCGGAAGCGATCCTAGGGCGATCA	0.15	0.11	0.4
1606	GGGGACCAGGTGCCGTAAGTTCACTATTGGCACTAAATCGGAACCCTAAAGGGTTTTTTTTTTTTTTTGCTTGACGGGGAAAGCCGGCGAACGTGGCGAGAAAAAACTGTGGCGCAGCGCCACCTAGCGGAAGCGATCCTAGGGCGATCA	0.27	0.05	0.94
1607	GGGGACCAGGTGCCGTAAGAACTGGTCTGGCACTAAATCGGAACCCTAAAGGGAGCCCCCGATTTAGAGCTTGACGGGGAAAAAACTGTGGCGCGGCGAGAAAGGAAGGGAAGAAATTTTTTTTTTTTTTTAGCGATCCTAGGGCGATCA	0.06	0.12	0.56
1608	GGGGACCAGGTGCCGTAAGAGGCGAATTAGCACTAAATCGGAACCCTAAAGGGTTTTTTTTTTTTTTTGCTTGACGGGGAAAAAACTGTGGCGCGGCGAGAAAGGAAGGGAAGAAAGCGCCACCTAGCGGAAGCGATCCTAGGGCGATCA	NaN	0.11	0.47
1609	GGGGACCAGGTGCCGTAAGAACGTCTCCTGCACTAAATCGGAACCCTAAAGGGAGCCCCCGATTTAGAGCTTGACGGGGAAAGCCGGCGAACGTGGCGAGAAAGGAAGCGCGCGCATTTTTTTTTTTTTTTAGCGATCCTAGGGCGATCA	0.24	0.13	1.04
1610	GGGGACCAGGTGCCGTAAGCGCAACCGCAGCACTAAATCGGAACCCTAAAGGGAGCCCCCGATTTAGAGCTTGACGGGGTTTTTTTTTTTTTTTGGCGAGAAAGGAAGCGCGCGCAGCGCCACCTAGCGGAAGCGATCCTAGGGCGATCA	0.17	0.1	0.67
1611	GGGGACCAGGTGCCGTAAGTCGCTTAAGTGCACTAAATCGGAACCCTAAAGGGTTTTTTTTTTTTTTTGCTTGACGGGGAAAGCCGGCGAACGTGGCGAGAAAGGAAGCGCGCGCAGCGCCACCTAGCGGAAGCGATCCTAGGGCGATCA	0.28	0.07	0.81
1612	GGGGACCAGGTGCCGTAAGTATTCTTTAGGCACTAAATCGGAACCCTAAAGGGAGCCCCCGATTTAGAGCTTGACGGGGAAAGCCGGCGCGCGCGGCGAGAAAGGAAGGGAAGAAATTTTTTTTTTTTTTTAGCGATCCTAGGGCGATCA	0.12	0.14	0.96
1613	GGGGACCAGGTGCCGTAAGATCCTGTTTGGCACTAAATCGGAACCCTAAAGGGTTTTTTTTTTTTTTTGCTTGACGGGGAAAGCCGGCGCGCGCGGCGAGAAAGGAAGGGAAGAAAGCGCCACCTAGCGGAAGCGATCCTAGGGCGATCA	0.34	0.08	0.85
1614	GGGGACCAGGTGCCGTAAGATACGGTATGGCACTAAATCGGAACCCTAAAGGGAGCCCCCGATTTAGAGCTTGACGGGGAAAGCCGGCGAACGTGGCGAGAAAGGAAGTTGGAGAATTTTTTTTTTTTTTTAGCGATCCTAGGGCGATCA	0.18	0.66	0.91
1615	GGGGACCAGGTGCCGTAAGCCACCGCTCAGCACTAAATCGGAACCCTAAAGGGAGCCCCCGATTTAGAGCTTGACGGGGTTTTTTTTTTTTTTTGGCGAGAAAGGAAGTTGGAGAAGCGCCACCTAGCGGAAGCGATCCTAGGGCGATCA	0.16	0.12	0.56
1616	GGGGACCAGGTGCCGTAAGGGCCTGCTCAGCACTAAATCGGAACCCTAAAGGGTTTTTTTTTTTTTTTGCTTGACGGGGAAAGCCGGCGAACGTGGCGAGAAAGGAAGTTGGAGAAGCGCCACCTAGCGGAAGCGATCCTAGGGCGATCA	0.29	0.08	0.91
1617	GGGGACCAGGTGCCGTAAGATGTCAACACGCACTAAATCGGAACCCTAAAGGGAGCCCCCGATTTAGAGCTTGACGGGGAAAGCCAGTTGGAGAGGCGAGAAAGGAAGGGAAGAAATTTTTTTTTTTTTTTAGCGATCCTAGGGCGATCA	NaN	0.09	1.21
1618	GGGGACCAGGTGCCGTAAGGCAGCGATACGCACTAAATCGGAACCCTAAAGGGTTTTTTTTTTTTTTTGCTTGACGGGGAAAGCCAGTTGGAGAGGCGAGAAAGGAAGGGAAGAAAGCGCCACCTAGCGGAAGCGATCCTAGGGCGATCA	0.32	0.12	0.94
1619	GGGGACCAGGTGCCGTAAGTACAAAGCCAGCACTAAATCGGAACCCTAAAGGGAGCCCCCGATTTAGAGCTTGACGGGGAAAGCCGGCGAACGTGGCGAGAATCCATTCATCCGAATTTTTTTTTTTTTTTAGCGATCCTAGGGCGATCA	0.2	0.14	0.99
1620	GGGGACCAGGTGCCGTAAGGCCGCAAACGGCACTAAATCGGAACCCTAAAGGGAGCCCCCGATTTAGAGCTTGACGGGGTTTTTTTTTTTTTTTGGCGAGAATCCATTCATCCGAAGCGCCACCTAGCGGAAGCGATCCTAGGGCGATCA	0.09	0.11	0.55
1621	GGGGACCAGGTGCCGTAAGAGTCGGTTACGCACTAAATCGGAACCCTAAAGGGTTTTTTTTTTTTTTTGCTTGACGGGGAAAGCCGGCGAACGTGGCGAGAATCCATTCATCCGAAGCGCCACCTAGCGGAAGCGATCCTAGGGCGATCA	0.31	0.14	0.91
1622	GGGGACCAGGTGCCGTAAGTACTAACTTTGCACTAAATCGGAACCCTAAAGGGAGCCCCCGATTTAGAGCTTGACGGGGAATCCATTCATCCGAGGCGAGAAAGGAAGGGAAGAAATTTTTTTTTTTTTTTAGCGATCCTAGGGCGATCA	0.36	0.2	0.75
1623	GGGGACCAGGTGCCGTAAGAGTTGGACAAGCACTAAATCGGAACCCTAAAGGGTTTTTTTTTTTTTTTGCTTGACGGGGAATCCATTCATCCGAGGCGAGAAAGGAAGGGAAGAAAGCGCCACCTAGCGGAAGCGATCCTAGGGCGATCA	0.22	0.31	0.8
1624	GGGGACCAGGTGCCGTAAGCCTGGAGATCGCACTAAATCGGAACCCTAAAGGGAGCCCCCGATTTAGAGCTTGACGGGGAAAGCCGGCGAACGTGGCGAGATTTCCAATGGAATTATTTTTTTTTTTTTTTAGCGATCCTAGGGCGATCA	0.15	0.15	0.78
1625	GGGGACCAGGTGCCGTAAGGCGAACTCCCGCACTAAATCGGAACCCTAAAGGGAGCCCCCGATTTAGAGCTTGACGGGGTTTTTTTTTTTTTTTGGCGAGATTTCCAATGGAATTAGCGCCACCTAGCGGAAGCGATCCTAGGGCGATCA	0.04	0.13	0.39
1626	GGGGACCAGGTGCCGTAAGTGTATGAGATGCACTAAATCGGAACCCTAAAGGGTTTTTTTTTTTTTTTGCTTGACGGGGAAAGCCGGCGAACGTGGCGAGATTTCCAATGGAATTAGCGCCACCTAGCGGAAGCGATCCTAGGGCGATCA	NaN	0.12	0.71
1627	GGGGACCAGGTGCCGTAAGCTTTAGCACAGCACTAAATCGGAACCCTAAAGGGAGCCCCCGATTTAGAGCTTGACGGGGATTTCCAATGGAATTGGCGAGAAAGGAAGGGAAGAAATTTTTTTTTTTTTTTAGCGATCCTAGGGCGATCA	0.17	0.19	0.65
1628	GGGGACCAGGTGCCGTAAGTCGTCGTGGCGCACTAAATCGGAACCCTAAAGGGTTTTTTTTTTTTTTTGCTTGACGGGGATTTCCAATGGAATTGGCGAGAAAGGAAGGGAAGAAAGCGCCACCTAGCGGAAGCGATCCTAGGGCGATCA	0.24	0.11	0.68
1629	GGGGACCAGGTGCCGTAAGTGTAATGGAGGCACTAAATCGGAACCCTAAAGGGAGCCCCCGATTTAGAGCTTGACGGGGAAAGCCGGCGAACGTGGCGAGAAAGGAGGCTTCCACATTTTTTTTTTTTTTTAGCGATCCTAGGGCGATCA	0.16	0.11	0.91
1630	GGGGACCAGGTGCCGTAAGCATTGACGAAGCACTAAATCGGAACCCTAAAGGGAGCCCCCGATTTAGAGCTTGACGGGGTTTTTTTTTTTTTTTGGCGAGAAAGGAGGCTTCCACAGCGCCACCTAGCGGAAGCGATCCTAGGGCGATCA	0.15	0.13	0.53
1631	GGGGACCAGGTGCCGTAAGTTACATGTTAGCACTAAATCGGAACCCTAAAGGGTTTTTTTTTTTTTTTGCTTGACGGGGAAAGCCGGCGAACGTGGCGAGAAAGGAGGCTTCCACAGCGCCACCTAGCGGAAGCGATCCTAGGGCGATCA	NaN	0.08	0.91
1632	GGGGACCAGGTGCCGTAAGGTTTACCTGTGCACTAAATCGGAACCCTAAAGGGAGCCCCCGATTTAGAGCTTGACGGGGAAAGCCGGCTTCCACGGCGAGAAAGGAAGGGAAGAAATTTTTTTTTTTTTTTAGCGATCCTAGGGCGATCA	0.15	0.14	1.08
1633	GGGGACCAGGTGCCGTAAGGACACCATAGGCACTAAATCGGAACCCTAAAGGGTTTTTTTTTTTTTTTGCTTGACGGGGAAAGCCGGCTTCCACGGCGAGAAAGGAAGGGAAGAAAGCGCCACCTAGCGGAAGCGATCCTAGGGCGATCA	NaN	0.14	1.05
1634	GGGGACCAGGTGCCGTAAGTAGTCAGGTGGCACTAAATCGGAACCCTAAAGGGAGCCCCCGATTTAGAGCTTGACGGGGAAAGCCGGCGAACGTGGCGAGAAAGGATGACTCCGGATTTTTTTTTTTTTTTAGCGATCCTAGGGCGATCA	0.16	0.13	0.94
1635	GGGGACCAGGTGCCGTAAGCCAGTGAGAAGCACTAAATCGGAACCCTAAAGGGAGCCCCCGATTTAGAGCTTGACGGGGTTTTTTTTTTTTTTTGGCGAGAAAGGATGACTCCGGAGCGCCACCTAGCGGAAGCGATCCTAGGGCGATCA	0.17	0.1	0.5
1636	GGGGACCAGGTGCCGTAAGGCAGCCTGGGGCACTAAATCGGAACCCTAAAGGGTTTTTTTTTTTTTTTGCTTGACGGGGAAAGCCGGCGAACGTGGCGAGAAAGGATGACTCCGGAGCGCCACCTAGCGGAAGCGATCCTAGGGCGATCA	0.24	0.09	0.75
1637	GGGGACCAGGTGCCGTAAGGCGCACCGAGGCACTAAATCGGAACCCTAAAGGGAGCCCCCGATTTAGAGCTTGACGGGGAAAGCCTGACTCCGGGGCGAGAAAGGAAGGGAAGAAATTTTTTTTTTTTTTTAGCGATCCTAGGGCGATCA	NaN	0.18	0.68
1638	GGGGACCAGGTGCCGTAAGATTGCAACGCGCACTAAATCGGAACCCTAAAGGGTTTTTTTTTTTTTTTGCTTGACGGGGAAAGCCTGACTCCGGGGCGAGAAAGGAAGGGAAGAAAGCGCCACCTAGCGGAAGCGATCCTAGGGCGATCA	0.16	0.1	0.97
1639	GGGGACCAGGTGCCGTAAGAGGTAACAGTGCACTAAATCGGAACCCTAAAGGGAGCCCCCGATTTAGAGCTTGACGGGGAAAGCCGGCGAACGTGGCGAGAAAGGAAGCGCGAAAATTTTTTTTTTTTTTTAGCGATCCTAGGGCGATCA	0.16	0.08	0.99
1640	GGGGACCAGGTGCCGTAAGTCTAAGTTTTGCACTAAATCGGAACCCTAAAGGGAGCCCCCGATTTAGAGCTTGACGGGGTTTTTTTTTTTTTTTGGCGAGAAAGGAAGCGCGAAAAGCGCCACCTAGCGGAAGCGATCCTAGGGCGATCA	0.16	0.08	0.51
1641	GGGGACCAGGTGCCGTAAGAAAACTACGCGCACTAAATCGGAACCCTAAAGGGTTTTTTTTTTTTTTTGCTTGACGGGGAAAGCCGGCGAACGTGGCGAGAAAGGAAGCGCGAAAAGCGCCACCTAGCGGAAGCGATCCTAGGGCGATCA	0.2	0.1	0.81
1642	GGGGACCAGGTGCCGTAAGATGCACTAGCGCACTAAATCGGAACCCTAAAGGGAGCCCCCGATTTAGAGCTTGACGGGGAAAGCCGGCGCGAAAGGCGAGAAAGGAAGGGAAGAAATTTTTTTTTTTTTTTAGCGATCCTAGGGCGATCA	0.14	0.16	1.12
1643	GGGGACCAGGTGCCGTAAGACATGTGAAGGCACTAAATCGGAACCCTAAAGGGTTTTTTTTTTTTTTTGCTTGACGGGGAAAGCCGGCGCGAAAGGCGAGAAAGGAAGGGAAGAAAGCGCCACCTAGCGGAAGCGATCCTAGGGCGATCA	NaN	0.35	0.73
1644	GGGGACCAGGTGCCGTAAGTCGTTGACACGCACTAAATCGGAACCCTAAAGGGAGCCCCCGATTTAGAGCTTGACGGGGAAAGCCGGCGAACGTGGCGAGAAAGGAGTCACGTGAATTTTTTTTTTTTTTTAGCGATCCTAGGGCGATCA	0.16	0.12	0.99
1645	GGGGACCAGGTGCCGTAAGAGCATTGCCCGCACTAAATCGGAACCCTAAAGGGAGCCCCCGATTTAGAGCTTGACGGGGTTTTTTTTTTTTTTTGGCGAGAAAGGAGTCACGTGAAGCGCCACCTAGCGGAAGCGATCCTAGGGCGATCA	0.14	0.08	0.66
1646	GGGGACCAGGTGCCGTAAGAGTGCTTTTCGCACTAAATCGGAACCCTAAAGGGTTTTTTTTTTTTTTTGCTTGACGGGGAAAGCCGGCGAACGTGGCGAGAAAGGAGTCACGTGAAGCGCCACCTAGCGGAAGCGATCCTAGGGCGATCA	0.14	0.09	0.86
1647	GGGGACCAGGTGCCGTAAGTTGTCTATGCGCACTAAATCGGAACCCTAAAGGGAGCCCCCGATTTAGAGCTTGACGGGGAAAGCAGTCACGTGAGGCGAGAAAGGAAGGGAAGAAATTTTTTTTTTTTTTTAGCGATCCTAGGGCGATCA	0.16	0.12	0.98
1648	GGGGACCAGGTGCCGTAAGAAGGTGTAAGGCACTAAATCGGAACCCTAAAGGGTTTTTTTTTTTTTTTGCTTGACGGGGAAAGCAGTCACGTGAGGCGAGAAAGGAAGGGAAGAAAGCGCCACCTAGCGGAAGCGATCCTAGGGCGATCA	NaN	NaN	1.18
1649	GGGGACCAGGTGCCGTAAGCTCGTGTCCCGCACTAAATCGGAACCCTAAAGGGAGCCCCCGATTTAGAGCTTGACGGGGAAAGCCGGCGAACGTGGCGAGAAAGGCCGCCGGCGGATTTTTTTTTTTTTTTAGCGATCCTAGGGCGATCA	0.18	0.16	0.84
1650	GGGGACCAGGTGCCGTAAGGTAGTTGAAGGCACTAAATCGGAACCCTAAAGGGAGCCCCCGATTTAGAGCTTGACGGGGTTTTTTTTTTTTTTTGGCGAGAAAGGCCGCCGGCGGAGCGCCACCTAGCGGAAGCGATCCTAGGGCGATCA	NaN	0.22	0.52
1651	GGGGACCAGGTGCCGTAAGTCAGGATTTGGCACTAAATCGGAACCCTAAAGGGTTTTTTTTTTTTTTTGCTTGACGGGGAAAGCCGGCGAACGTGGCGAGAAAGGCCGCCGGCGGAGCGCCACCTAGCGGAAGCGATCCTAGGGCGATCA	NaN	0.11	1.04
1652	GGGGACCAGGTGCCGTAAGCACACGCTATGCACTAAATCGGAACCCTAAAGGGAGCCCCCGATTTAGAGCTTGACGGGGAAAGCCCGCCGGCGGGGCGAGAAAGGAAGGGAAGAAATTTTTTTTTTTTTTTAGCGATCCTAGGGCGATCA	0.12	0.12	1.05
1653	GGGGACCAGGTGCCGTAAGGGACGGTCACGCACTAAATCGGAACCCTAAAGGGTTTTTTTTTTTTTTTGCTTGACGGGGAAAGCCCGCCGGCGGGGCGAGAAAGGAAGGGAAGAAAGCGCCACCTAGCGGAAGCGATCCTAGGGCGATCA	0.36	0.06	0.92
1654	GGGGACCAGGTGCCGTAAGCCTTAGTGGCAAGCCGGACAGGCAGCGACAGCCCTGACAGACAAGACTCTCCTAGCTGCGTCCTCGTCTTCACCGGTCGCGTTCCTGAGACGCAAATTTTTTTTTTTTTTTTCGCGATCCTAGGGCGATCA	0.18	0.07	1.1
1655	GGGGACCAGGTGCCGTAAGGTGGGCAGTGAAGCCGGACAGGCAGCGACAGCCCTGACAGACAAGACTCTCCTAGCTGCGTTTTTTTTTTTTTTTGTCGCGTTCCTGAGACGCAAATGTGCCTACAGCCGCACGCGATCCTAGGGCGATCA	0.12	0.07	0.74
1656	GGGGACCAGGTGCCGTAAGACAAAATCTCAAGCCGGACAGGCAGCGACAGCCCTTTTTTTTTTTTTTTTCCTAGCTGCGTCCTCGTCTTCACCGGTCGCGTTCCTGAGACGCAAATGTGCCTACAGCCGCACGCGATCCTAGGGCGATCA	0.2	0.06	0.8
1657	GGGGACCAGGTGCCGTAAGCTCGACTTGCAAGCCGGACAGGCAGCGACAGCCCTGACAGACAAGACTCTCCTAGCTGCGTCCTCGTGACGCAAAGTCGCGTTCCTGAAACGCAGATTTTTTTTTTTTTTTTCGCGATCCTAGGGCGATCA	0.3	0.08	1.06
1658	GGGGACCAGGTGCCGTAAGCACTGAGGTGAAGCCGGACAGGCAGCGACAGCCCTTTTTTTTTTTTTTTTCCTAGCTGCGTCCTCGTGACGCAAAGTCGCGTTCCTGAAACGCAGATGTGCCTACAGCCGCACGCGATCCTAGGGCGATCA	0.24	0.06	0.84
1659	GGGGACCAGGTGCCGTAAGCCAAGATCGGAAGCCGGACAGGCAGCGACAGCCCTGACAGACAAGACTCTCCTAGCTGCGTCCTCGTCTTCACCGGTCGCGTTCCCACCCATACATTTTTTTTTTTTTTTTTCGCGATCCTAGGGCGATCA	0.21	0.08	1.15
1660	GGGGACCAGGTGCCGTAAGACGTACCGGCAAGCCGGACAGGCAGCGACAGCCCTGACAGACAAGACTCTCCTAGCTGCGTTTTTTTTTTTTTTTGTCGCGTTCCCACCCATACATTGTGCCTACAGCCGCACGCGATCCTAGGGCGATCA	0.11	0.04	0.77
1661	GGGGACCAGGTGCCGTAAGGGGACTACGCAAGCCGGACAGGCAGCGACAGCCCTTTTTTTTTTTTTTTTCCTAGCTGCGTCCTCGTCTTCACCGGTCGCGTTCCCACCCATACATTGTGCCTACAGCCGCACGCGATCCTAGGGCGATCA	0.23	0.07	0.91
1662	GGGGACCAGGTGCCGTAAGGATCCCAACAAAGCCGGACAGGCAGCGACAGCCCTGACAGACAAGACTCTCCTAGCTGCGTCCTCACCCATACATGTCGCGTTCCTGAAACGCAGATTTTTTTTTTTTTTTTCGCGATCCTAGGGCGATCA	0.19	0.15	1.06
1663	GGGGACCAGGTGCCGTAAGCTCATTTAGAAAGCCGGACAGGCAGCGACAGCCCTTTTTTTTTTTTTTTTCCTAGCTGCGTCCTCACCCATACATGTCGCGTTCCTGAAACGCAGATGTGCCTACAGCCGCACGCGATCCTAGGGCGATCA	0.25	0.06	0.95
1664	GGGGACCAGGTGCCGTAAGAAGTAAAGTGAAGCCGGACAGGCAGCGACAGCCCTGACAGACAAGACTCTCCTAGCTGCGTCCTCGTCTTCACCGGTCGCGTTCAAACTGTGGCGCTTTTTTTTTTTTTTTTCGCGATCCTAGGGCGATCA	0.25	0.1	1.13
1665	GGGGACCAGGTGCCGTAAGGTTTTGAATAAAGCCGGACAGGCAGCGACAGCCCTGACAGACAAGACTCTCCTAGCTGCGTTTTTTTTTTTTTTTGTCGCGTTCAAACTGTGGCGCTGTGCCTACAGCCGCACGCGATCCTAGGGCGATCA	0.16	0.07	0.93
1666	GGGGACCAGGTGCCGTAAGGATCCACAATAAGCCGGACAGGCAGCGACAGCCCTTTTTTTTTTTTTTTTCCTAGCTGCGTCCTCGTCTTCACCGGTCGCGTTCAAACTGTGGCGCTGTGCCTACAGCCGCACGCGATCCTAGGGCGATCA	0.19	0.07	0.9
1667	GGGGACCAGGTGCCGTAAGGCTATCGCATAAGCCGGACAGGCAGCGACAGCCCTGACAGACAAGACTCTCCTAGCTGCGTCCAAACTGTGGCGCGTCGCGTTCCTGAAACGCAGATTTTTTTTTTTTTTTTCGCGATCCTAGGGCGATCA	0.18	0.07	1
1668	GGGGACCAGGTGCCGTAAGCACAACTTGAAAGCCGGACAGGCAGCGACAGCCCTTTTTTTTTTTTTTTTCCTAGCTGCGTCCAAACTGTGGCGCGTCGCGTTCCTGAAACGCAGATGTGCCTACAGCCGCACGCGATCCTAGGGCGATCA	0.21	0.08	0.9
1669	GGGGACCAGGTGCCGTAAGTTCTGGGCGTAAGCCGGACAGGCAGCGACAGCCCTGACAGACAAGACTCTCCTAGCTGCGTCCTCGTCTTCACCGGTCGCGTTCCTGAGCGCGCGCTTTTTTTTTTTTTTTTCGCGATCCTAGGGCGATCA	0.16	0.06	1.15
1670	GGGGACCAGGTGCCGTAAGGTAGCAAACAAAGCCGGACAGGCAGCGACAGCCCTGACAGACAAGACTCTCCTAGCTGCGTTTTTTTTTTTTTTTGTCGCGTTCCTGAGCGCGCGCTGTGCCTACAGCCGCACGCGATCCTAGGGCGATCA	0.14	0.1	0.85
1671	GGGGACCAGGTGCCGTAAGCCTCACTGCCAAGCCGGACAGGCAGCGACAGCCCTTTTTTTTTTTTTTTTCCTAGCTGCGTCCTCGTCTTCACCGGTCGCGTTCCTGAGCGCGCGCTGTGCCTACAGCCGCACGCGATCCTAGGGCGATCA	0.14	0.05	1.03
1672	GGGGACCAGGTGCCGTAAGAGCGGGTAGTAAGCCGGACAGGCAGCGACAGCCCTGACAGACAAGACTCTCCTAGCTGCGTCCTCGTGCGCGCGCGTCGCGTTCCTGAAACGCAGATTTTTTTTTTTTTTTTCGCGATCCTAGGGCGATCA	0.2	0.12	1.13
1673	GGGGACCAGGTGCCGTAAGGAGCTACTCTAAGCCGGACAGGCAGCGACAGCCCTTTTTTTTTTTTTTTTCCTAGCTGCGTCCTCGTGCGCGCGCGTCGCGTTCCTGAAACGCAGATGTGCCTACAGCCGCACGCGATCCTAGGGCGATCA	0.26	0.06	1.03
1674	GGGGACCAGGTGCCGTAAGTTTCAAATGTAAGCCGGACAGGCAGCGACAGCCCTGACAGACAAGACTCTCCTAGCTGCGTCCTCGTCTTCACCGGTCGCGTTCCTGAGTTGGAGATTTTTTTTTTTTTTTTCGCGATCCTAGGGCGATCA	0.21	0.08	1.15
1675	GGGGACCAGGTGCCGTAAGGCTCGAACCCAAGCCGGACAGGCAGCGACAGCCCTGACAGACAAGACTCTCCTAGCTGCGTTTTTTTTTTTTTTTGTCGCGTTCCTGAGTTGGAGATGTGCCTACAGCCGCACGCGATCCTAGGGCGATCA	0.13	0.06	0.75
1676	GGGGACCAGGTGCCGTAAGCCTGAGCGCAAAGCCGGACAGGCAGCGACAGCCCTTTTTTTTTTTTTTTTCCTAGCTGCGTCCTCGTCTTCACCGGTCGCGTTCCTGAGTTGGAGATGTGCCTACAGCCGCACGCGATCCTAGGGCGATCA	0.16	0.05	0.88
1677	GGGGACCAGGTGCCGTAAGCTTGCTTAGTAAGCCGGACAGGCAGCGACAGCCCTGACAGACAAGACTCTCCTAGCTGCGTCCTCGAGTTGGAGAGTCGCGTTCCTGAAACGCAGATTTTTTTTTTTTTTTTCGCGATCCTAGGGCGATCA	0.21	0.11	1.03
1678	GGGGACCAGGTGCCGTAAGTCTTGGATCCAAGCCGGACAGGCAGCGACAGCCCTTTTTTTTTTTTTTTTCCTAGCTGCGTCCTCGAGTTGGAGAGTCGCGTTCCTGAAACGCAGATGTGCCTACAGCCGCACGCGATCCTAGGGCGATCA	0.27	0.05	0.86
1679	GGGGACCAGGTGCCGTAAGGGCAAGCTGTAAGCCGGACAGGCAGCGACAGCCCTGACAGACAAGACTCTCCTAGCTGCGTCCTCGTCTTCACCGGTCGCGTTTCCATTCATCCGATTTTTTTTTTTTTTTTCGCGATCCTAGGGCGATCA	0.22	0.07	1.12
1680	GGGGACCAGGTGCCGTAAGTGCCTGTCAAAAGCCGGACAGGCAGCGACAGCCCTGACAGACAAGACTCTCCTAGCTGCGTTTTTTTTTTTTTTTGTCGCGTTTCCATTCATCCGATGTGCCTACAGCCGCACGCGATCCTAGGGCGATCA	0.11	0.07	0.79
1681	GGGGACCAGGTGCCGTAAGGCTACCACGTAAGCCGGACAGGCAGCGACAGCCCTTTTTTTTTTTTTTTTCCTAGCTGCGTCCTCGTCTTCACCGGTCGCGTTTCCATTCATCCGATGTGCCTACAGCCGCACGCGATCCTAGGGCGATCA	0.18	0.06	0.9
1682	GGGGACCAGGTGCCGTAAGGGTAACACAGAAGCCGGACAGGCAGCGACAGCCCTGACAGACAAGACTCTCCTAGCTGCGTCTCCATTCATCCGAGTCGCGTTCCTGAAACGCAGATTTTTTTTTTTTTTTTCGCGATCCTAGGGCGATCA	0.2	0.07	1.04
1683	GGGGACCAGGTGCCGTAAGGAATTGTTGAAAGCCGGACAGGCAGCGACAGCCCTTTTTTTTTTTTTTTTCCTAGCTGCGTCTCCATTCATCCGAGTCGCGTTCCTGAAACGCAGATGTGCCTACAGCCGCACGCGATCCTAGGGCGATCA	0.32	0.05	0.96
1684	GGGGACCAGGTGCCGTAAGGGGTCCCAACAAGCCGGACAGGCAGCGACAGCCCTGACAGACAAGACTCTCCTAGCTGCGTCCTCGTCTTCACCGGTCGCGATTTCCAATGGAATTTTTTTTTTTTTTTTTTCGCGATCCTAGGGCGATCA	0.24	0.09	1.06
1685	GGGGACCAGGTGCCGTAAGAGAAGTGTGGAAGCCGGACAGGCAGCGACAGCCCTGACAGACAAGACTCTCCTAGCTGCGTTTTTTTTTTTTTTTGTCGCGATTTCCAATGGAATTTGTGCCTACAGCCGCACGCGATCCTAGGGCGATCA	0.15	0.07	0.59
1686	GGGGACCAGGTGCCGTAAGAATTTACGCTAAGCCGGACAGGCAGCGACAGCCCTTTTTTTTTTTTTTTTCCTAGCTGCGTCCTCGTCTTCACCGGTCGCGATTTCCAATGGAATTTGTGCCTACAGCCGCACGCGATCCTAGGGCGATCA	0.25	0.07	0.79
1687	GGGGACCAGGTGCCGTAAGCATATCGCTAAAGCCGGACAGGCAGCGACAGCCCTGACAGACAAGACTCTCCTAGCTGCGATTTCCAATGGAATTGTCGCGTTCCTGAAACGCAGATTTTTTTTTTTTTTTTCGCGATCCTAGGGCGATCA	0.17	0.09	0.96
1688	GGGGACCAGGTGCCGTAAGGGGCTCGCTCAAGCCGGACAGGCAGCGACAGCCCTTTTTTTTTTTTTTTTCCTAGCTGCGATTTCCAATGGAATTGTCGCGTTCCTGAAACGCAGATGTGCCTACAGCCGCACGCGATCCTAGGGCGATCA	0.26	0.07	0.72
1689	GGGGACCAGGTGCCGTAAGGACTCGCCCTAAGCCGGACAGGCAGCGACAGCCCTGACAGACAAGACTCTCCTAGCTGCGTCCTCGTCTTCACCGGTCGCGTTCCTGGGCTTCCACTTTTTTTTTTTTTTTTCGCGATCCTAGGGCGATCA	0.18	0.09	1.1
1690	GGGGACCAGGTGCCGTAAGCATACAACTCAAGCCGGACAGGCAGCGACAGCCCTGACAGACAAGACTCTCCTAGCTGCGTTTTTTTTTTTTTTTGTCGCGTTCCTGGGCTTCCACTGTGCCTACAGCCGCACGCGATCCTAGGGCGATCA	0.12	0.05	0.84
1691	GGGGACCAGGTGCCGTAAGATGTACGCCTAAGCCGGACAGGCAGCGACAGCCCTTTTTTTTTTTTTTTTCCTAGCTGCGTCCTCGTCTTCACCGGTCGCGTTCCTGGGCTTCCACTGTGCCTACAGCCGCACGCGATCCTAGGGCGATCA	0.2	0.05	0.93
1692	GGGGACCAGGTGCCGTAAGATCAAGTTAAAAGCCGGACAGGCAGCGACAGCCCTGACAGACAAGACTCTCCTAGCTGCGTCCTCGGGCTTCCACGTCGCGTTCCTGAAACGCAGATTTTTTTTTTTTTTTTCGCGATCCTAGGGCGATCA	0.24	0.08	1.05
1693	GGGGACCAGGTGCCGTAAGCGTCAACCAAAAGCCGGACAGGCAGCGACAGCCCTTTTTTTTTTTTTTTTCCTAGCTGCGTCCTCGGGCTTCCACGTCGCGTTCCTGAAACGCAGATGTGCCTACAGCCGCACGCGATCCTAGGGCGATCA	0.2	0.07	0.95
1694	GGGGACCAGGTGCCGTAAGCTTAGACCACAAGCCGGACAGGCAGCGACAGCCCTGACAGACAAGACTCTCCTAGCTGCGTCCTCGTCTTCACCGGTCGCGTTCCTGTGACTCCGGTTTTTTTTTTTTTTTTCGCGATCCTAGGGCGATCA	0.25	0.09	1.11
1695	GGGGACCAGGTGCCGTAAGTCTCGTTTGAAAGCCGGACAGGCAGCGACAGCCCTGACAGACAAGACTCTCCTAGCTGCGTTTTTTTTTTTTTTTGTCGCGTTCCTGTGACTCCGGTGTGCCTACAGCCGCACGCGATCCTAGGGCGATCA	0.16	0.08	0.87
1696	GGGGACCAGGTGCCGTAAGCCGGTCATTCAAGCCGGACAGGCAGCGACAGCCCTTTTTTTTTTTTTTTTCCTAGCTGCGTCCTCGTCTTCACCGGTCGCGTTCCTGTGACTCCGGTGTGCCTACAGCCGCACGCGATCCTAGGGCGATCA	0.13	0.06	0.89
1697	GGGGACCAGGTGCCGTAAGAGCAAACTCAAAGCCGGACAGGCAGCGACAGCCCTGACAGACAAGACTCTCCTAGCTGCGTCCTCGTGACTCCGGGTCGCGTTCCTGAAACGCAGATTTTTTTTTTTTTTTTCGCGATCCTAGGGCGATCA	0.21	0.08	0.9
1698	GGGGACCAGGTGCCGTAAGATCAACGTTAAAGCCGGACAGGCAGCGACAGCCCTTTTTTTTTTTTTTTTCCTAGCTGCGTCCTCGTGACTCCGGGTCGCGTTCCTGAAACGCAGATGTGCCTACAGCCGCACGCGATCCTAGGGCGATCA	0.26	0.06	0.87
1699	GGGGACCAGGTGCCGTAAGTCGATCCTATAAGCCGGACAGGCAGCGACAGCCCTGACAGACAAGACTCTCCTAGCTGCGTCCTCGTCTTCACCGGTCGCGTTCCTGAACGCGAAATTTTTTTTTTTTTTTTCGCGATCCTAGGGCGATCA	0.17	0.09	1.12
1700	GGGGACCAGGTGCCGTAAGCTTAATCGCCAAGCCGGACAGGCAGCGACAGCCCTGACAGACAAGACTCTCCTAGCTGCGTTTTTTTTTTTTTTTGTCGCGTTCCTGAACGCGAAATGTGCCTACAGCCGCACGCGATCCTAGGGCGATCA	0.11	0.06	0.81
1701	GGGGACCAGGTGCCGTAAGATCTGAAACCAAGCCGGACAGGCAGCGACAGCCCTTTTTTTTTTTTTTTTCCTAGCTGCGTCCTCGTCTTCACCGGTCGCGTTCCTGAACGCGAAATGTGCCTACAGCCGCACGCGATCCTAGGGCGATCA	0.21	0.08	0.85
1702	GGGGACCAGGTGCCGTAAGTAGCCCAGAGAAGCCGGACAGGCAGCGACAGCCCTGACAGACAAGACTCTCCTAGCTGCGTCCTCGTCCGCGAAAGTCGCGTTCCTGAAACGCAGATTTTTTTTTTTTTTTTCGCGATCCTAGGGCGATCA	0.2	0.08	1.01
1703	GGGGACCAGGTGCCGTAAGAGGTTGTGCGAAGCCGGACAGGCAGCGACAGCCCTTTTTTTTTTTTTTTTCCTAGCTGCGTCCTCGTCCGCGAAAGTCGCGTTCCTGAAACGCAGATGTGCCTACAGCCGCACGCGATCCTAGGGCGATCA	0.32	0.06	0.85
1704	GGGGACCAGGTGCCGTAAGATATCTTAACAAGCCGGACAGGCAGCGACAGCCCTGACAGACAAGACTCTCCTAGCTGCGTCCTCGTCTTCACCGGTCGCGTTCCTAGTCACGTGATTTTTTTTTTTTTTTTCGCGATCCTAGGGCGATCA	0.22	0.08	1.25
1705	GGGGACCAGGTGCCGTAAGGCAGGTAGCAAAGCCGGACAGGCAGCGACAGCCCTGACAGACAAGACTCTCCTAGCTGCGTTTTTTTTTTTTTTTGTCGCGTTCCTAGTCACGTGATGTGCCTACAGCCGCACGCGATCCTAGGGCGATCA	0.13	0.07	0.91
1706	GGGGACCAGGTGCCGTAAGACTCATGCTAAAGCCGGACAGGCAGCGACAGCCCTTTTTTTTTTTTTTTTCCTAGCTGCGTCCTCGTCTTCACCGGTCGCGTTCCTAGTCACGTGATGTGCCTACAGCCGCACGCGATCCTAGGGCGATCA	0.17	0.06	0.96
1707	GGGGACCAGGTGCCGTAAGTAAAGATCCGAAGCCGGACAGGCAGCGACAGCCCTGACAGACAAGACTCTCCTAGCTGCGTCCTCAGTCACGTGAGTCGCGTTCCTGAAACGCAGATTTTTTTTTTTTTTTTCGCGATCCTAGGGCGATCA	0.18	0.11	1.11
1708	GGGGACCAGGTGCCGTAAGAGAGTCCTAGAAGCCGGACAGGCAGCGACAGCCCTTTTTTTTTTTTTTTTCCTAGCTGCGTCCTCAGTCACGTGAGTCGCGTTCCTGAAACGCAGATGTGCCTACAGCCGCACGCGATCCTAGGGCGATCA	0.29	0.06	0.93
1709	GGGGACCAGGTGCCGTAAGTATGCCTATTAAGCCGGACAGGCAGCGACAGCCCTGACAGACAAGACTCTCCTAGCTGCGTCCTCGTCTTCACCGGTCGCGTTCCTCCGCCGGCGGTTTTTTTTTTTTTTTTCGCGATCCTAGGGCGATCA	0.25	0.06	1.18
1710	GGGGACCAGGTGCCGTAAGAGAGGACAGTAAGCCGGACAGGCAGCGACAGCCCTGACAGACAAGACTCTCCTAGCTGCGTTTTTTTTTTTTTTTGTCGCGTTCCTCCGCCGGCGGTGTGCCTACAGCCGCACGCGATCCTAGGGCGATCA	0.14	0.05	0.83
1711	GGGGACCAGGTGCCGTAAGGATTTGCCTTAAGCCGGACAGGCAGCGACAGCCCTTTTTTTTTTTTTTTTCCTAGCTGCGTCCTCGTCTTCACCGGTCGCGTTCCTCCGCCGGCGGTGTGCCTACAGCCGCACGCGATCCTAGGGCGATCA	0.21	0.08	0.94
1712	GGGGACCAGGTGCCGTAAGTCGACGCACCAAGCCGGACAGGCAGCGACAGCCCTGACAGACAAGACTCTCCTAGCTGCGTCCTCCCGCCGGCGGGTCGCGTTCCTGAAACGCAGATTTTTTTTTTTTTTTTCGCGATCCTAGGGCGATCA	0.22	0.06	1.04
1713	GGGGACCAGGTGCCGTAAGATATGAAGCGAAGCCGGACAGGCAGCGACAGCCCTTTTTTTTTTTTTTTTCCTAGCTGCGTCCTCCCGCCGGCGGGTCGCGTTCCTGAAACGCAGATGTGCCTACAGCCGCACGCGATCCTAGGGCGATCA	0.16	0.06	0.98
1714	GGGGACCAGGTGCCGTAAGCTGACGATAGGCACTAAATCGGAACCCTAAAGGGAGCCCCCGATTTAGAGCTTGACGGCGGAAGACTCTCCTCCGGGCGAGAAAGGTCGGAAAATCATTTTTTTTTTTTTTTAGCGATCCTAGGGCGATCA	0.18	3.41	0.75
1715	GGGGACCAGGTGCCGTAAGTAGCTCACGGGCACTAAATCGGAACCCTAAAGGGTTTTTTTTTTTTTTTGCTTGACGGCGGAAGACTCTCCTCCGGGCGAGAAAGGTCGGAAAATCAGCGCCACCTAGCGGAAGCGATCCTAGGGCGATCA	0.25	4.14	0.73
1716	GGGGACCAGGTGCCGTAAGAGTGGGACTTGCACTAAATCGGAACCCTAAAGGGAGCCCCCGATTTAGAGCTTGACGGGGAAAGGTCGGAAAATCGGCGCGGAAGACTCTCCTCCGATTTTTTTTTTTTTTTAGCGATCCTAGGGCGATCA	0.19	5.15	0.8
1717	GGGGACCAGGTGCCGTAAGAGGCAAGGCGGCACTAAATCGGAACCCTAAAGGGTTTTTTTTTTTTTTTGCTTGACGGGGAAAGGTCGGAAAATCGGCGCGGAAGACTCTCCTCCGAGCGCCACCTAGCGGAAGCGATCCTAGGGCGATCA	0.23	7.81	0.78
1718	GGGGACCAGGTGCCGTAAGCCATTCTTTTAAGCCGGACAGGCAGCGACAGCCCTGACAGACAAGACTCTCCTAGCTGCGGAAGACTCTCCTCCGGTCGCGTTCCGTCGGAAAATCTTTTTTTTTTTTTTTTCGCGATCCTAGGGCGATCA	0.25	3.59	1.09
1719	GGGGACCAGGTGCCGTAAGACTGACTTTGAAGCCGGACAGGCAGCGACAGCCCTTTTTTTTTTTTTTTTCCTAGCTGCGGAAGACTCTCCTCCGGTCGCGTTCCGTCGGAAAATCTGTGCCTACAGCCGCACGCGATCCTAGGGCGATCA	0.36	3.38	0.75
1720	GGGGACCAGGTGCCGTAAGTTCTAATGATAAGCCGGACAGGCAGCGACAGCCCTGACAGACAAGACTCTCCTAGCTGCGTCCTGTCGGAAAATCGTCGCGGAAGACTCTCCTCCGTTTTTTTTTTTTTTTTCGCGATCCTAGGGCGATCA	0.24	1.51	0.89
1721	GGGGACCAGGTGCCGTAAGATGTTCTGAAAAGCCGGACAGGCAGCGACAGCCCTTTTTTTTTTTTTTTTCCTAGCTGCGTCCTGTCGGAAAATCGTCGCGGAAGACTCTCCTCCGTGTGCCTACAGCCGCACGCGATCCTAGGGCGATCA	0.35	2.19	0.86
1722	GGGGACCAGGTGCCGTAAGCCTCTCGCTCGCACTAAATCGGAACCCTAAAGGGAGCCCCCGATTTAGAGCTTGACGGGGAAAGCCGGAACCGGCGGCGGCCTTATTTCTGGGGTAATTTTTTTTTTTTTTTAGCGATCCTAGGGCGATCA	0.26	0.14	0.77
1723	GGGGACCAGGTGCCGTAAGTTAGGACTAAGCACTAAATCGGAACCCTAAAGGGTTTTTTTTTTTTTTTGCTTGACGGGGAAAGCCGGAACCGGCGGCGGCCTTATTTCTGGGGTAAGCGCCACCTAGCGGAAGCGATCCTAGGGCGATCA	NaN	NaN	1.23
1724	GGGGACCAGGTGCCGTAAGGTGTAAGGTCGCACTAAATCGGAACCCTAAAGGGAGCCCCCGATTTAGAGCTTGACGGGCCTTATTTCTGGGGTAGGCGAGAAAGCCGGAACCGGCATTTTTTTTTTTTTTTAGCGATCCTAGGGCGATCA	0.17	0.09	0.71
1725	GGGGACCAGGTGCCGTAAGATATGCCGTTGCACTAAATCGGAACCCTAAAGGGTTTTTTTTTTTTTTTGCTTGACGGGCCTTATTTCTGGGGTAGGCGAGAAAGCCGGAACCGGCAGCGCCACCTAGCGGAAGCGATCCTAGGGCGATCA	0.15	0.07	0.78
1726	GGGGACCAGGTGCCGTAAGAGCTGACCTGAAGCCGGACAGGCAGCGACAGCCCTGACAGACAAGACTCTCCTAGCTGCGTCCGCCGGAACCGGCGTCGGCCTTATTTCTGGGGTATTTTTTTTTTTTTTTTCGCGATCCTAGGGCGATCA	0.25	0.08	0.87
1727	GGGGACCAGGTGCCGTAAGCCCTCGCACAAAGCCGGACAGGCAGCGACAGCCCTTTTTTTTTTTTTTTTCCTAGCTGCGTCCGCCGGAACCGGCGTCGGCCTTATTTCTGGGGTATGTGCCTACAGCCGCACGCGATCCTAGGGCGATCA	0.23	0.05	0.79
1728	GGGGACCAGGTGCCGTAAGTGTGGGCATAAAGCCGGACAGGCAGCGACAGCCCTGACAGACAAGACTCTCCTAGCTGGCCTTATTTCTGGGGTAGTCGCGTTCGCCGGAACCGGCTTTTTTTTTTTTTTTTCGCGATCCTAGGGCGATCA	0.21	0.09	0.88
1729	GGGGACCAGGTGCCGTAAGATGAAAATCGAAGCCGGACAGGCAGCGACAGCCCTTTTTTTTTTTTTTTTCCTAGCTGGCCTTATTTCTGGGGTAGTCGCGTTCGCCGGAACCGGCTGTGCCTACAGCCGCACGCGATCCTAGGGCGATCA	0.18	0.08	0.72
1730	GGGGACCAGGTGCCGTAAGTCAAGTAGTAGCACTAAATCGGAACCCTAAAGGGAGCCCCCGATTTAGAGCTTGACGGGGAAAGCCGGCGAACGTGGCGAGAAAGATGTATGGGTGATTTTTTTTTTTTTTTAGCGATCCTAGGGCGATCA	0.4	0.17	0.79
1731	GGGGACCAGGTGCCGTAAGGTTTGTATCCGCACTAAATCGGAACCCTAAAGGGAGCCCCCGATTTAGAGCTTGACGGGGTTTTTTTTTTTTTTTGGCGAGAAAGATGTATGGGTGAGCGCCACCTAGCGGAAGCGATCCTAGGGCGATCA	0.14	0.07	0.66
1732	GGGGACCAGGTGCCGTAAGATAGGTCCTGGCACTAAATCGGAACCCTAAAGGGTTTTTTTTTTTTTTTGCTTGACGGGGAAAGCCGGCGAACGTGGCGAGAAAGATGTATGGGTGAGCGCCACCTAGCGGAAGCGATCCTAGGGCGATCA	0.42	0.43	0.95
1733	GGGGACCAGGTGCCGTAAGGGCCTTACTGGCACTAAATCGGAACCCTAAAGGGAGCCCCCGATTTAGAGCTTGACGGGGAAAGATGTATGGGTGGGCGAGAAAGGAAGGGAAGAAATTTTTTTTTTTTTTTAGCGATCCTAGGGCGATCA	NaN	NaN	0.68
1734	GGGGACCAGGTGCCGTAAGTGCTCAGGATGCACTAAATCGGAACCCTAAAGGGTTTTTTTTTTTTTTTGCTTGACGGGGAAAGATGTATGGGTGGGCGAGAAAGGAAGGGAAGAAAGCGCCACCTAGCGGAAGCGATCCTAGGGCGATCA	0.22	0.09	0.68
1735	GGGGACCAGGTGCCGTAAGTTAGGCAGCCAAGCCGGACAGGCAGCGACAGCCCTGACAGACAAGACTCTCCTAGCTGCGTCCTCGTCTTCACCGGTCGCGTTCCATGTATGGGTGTTTTTTTTTTTTTTTTCGCGATCCTAGGGCGATCA	0.18	0.07	1.03
1736	GGGGACCAGGTGCCGTAAGTTACACTACAAAGCCGGACAGGCAGCGACAGCCCTGACAGACAAGACTCTCCTAGCTGCGTTTTTTTTTTTTTTTGTCGCGTTCCATGTATGGGTGTGTGCCTACAGCCGCACGCGATCCTAGGGCGATCA	0.14	0.05	0.8
1737	GGGGACCAGGTGCCGTAAGTAGCGAGTTTAAGCCGGACAGGCAGCGACAGCCCTTTTTTTTTTTTTTTTCCTAGCTGCGTCCTCGTCTTCACCGGTCGCGTTCCATGTATGGGTGTGTGCCTACAGCCGCACGCGATCCTAGGGCGATCA	0.2	0.06	0.86
1738	GGGGACCAGGTGCCGTAAGACGACAGATAAAGCCGGACAGGCAGCGACAGCCCTGACAGACAAGACTCTCCTAGCTGCGTCCTATGTATGGGTGGTCGCGTTCCTGAAACGCAGATTTTTTTTTTTTTTTTCGCGATCCTAGGGCGATCA	0.16	0.09	0.89
1739	GGGGACCAGGTGCCGTAAGAATATCTCAGAAGCCGGACAGGCAGCGACAGCCCTTTTTTTTTTTTTTTTCCTAGCTGCGTCCTATGTATGGGTGGTCGCGTTCCTGAAACGCAGATGTGCCTACAGCCGCACGCGATCCTAGGGCGATCA	0.23	0.06	0.97
1740	GGGGACCAGGTGCCGTAAGTCGGACCGCCGCACTAAATCGGAACCCTAAAGGGTTTTTTTTTTTTTTTGCTTGACGGGGAAAGCCGGCGAACGTGGCGCGGAAGACTCTCCTCCGATTTTTTTTTTTTTTTAGCGATCCTAGGGCGATCA	0.16	4.61	0.82
1741	GGGGACCAGGTGCCGTAAGAACTAATGGTGCACTAAATCGGAACCCTAAAGGGTTTTTTTTTTTTTTTGCTTGACGGGGAAAGCCGGCGAACGGAAGACTCTCCTCCGGGAAGAAATTTTTTTTTTTTTTTAGCGATCCTAGGGCGATCA	0.23	4.84	0.87
1742	GGGGACCAGGTGCCGTAAGCCACCGTCATGCACTAAATCGGAACCCTAAAGGGTTTTTTTTTTTTTTTGCTTGACGGGGAAAGCCGGCCGGAAGACTCTCCTCCGAAGGGAAGAAATTTTTTTTTTTTTTTAGCGATCCTAGGGCGATCA	0.29	11.06	0.79
1743	GGGGACCAGGTGCCGTAAGAGTCTTTCATGCACTAAATCGGAACCCTAAAGGGTTTTTTTTTTTTTTTGCTTGACGGGGAAAGCCGGAAGACTCTCCTCCGAAGGAAGGGAAGAAATTTTTTTTTTTTTTTAGCGATCCTAGGGCGATCA	0.46	9.88	0.85
1744	GGGGACCAGGTGCCGTAAGGCTAGTCTGTGCACTAAATCGGAACCCTAAAGGGTTTTTTTTTTTTTTTGCTTGACGGGGAACGGAAGACTCTCCTCCGAGAAAGGAAGGGAAGAAATTTTTTTTTTTTTTTAGCGATCCTAGGGCGATCA	NaN	7.63	0.8
1745	GGGGACCAGGTGCCGTAAGGGCTACTGTCGCACTAAATCGGAACCCTAAAGGGTTTTTTTTTTTTTTTGCTTGACGGCGGAAGACTCTCCTCCGGGCGAGAAAGGAAGGGAAGAAATTTTTTTTTTTTTTTAGCGATCCTAGGGCGATCA	0.21	3.94	0.72
1746	GGGGACCAGGTGCCGTAAGGTGTAGTGACGCACTAAATCGGAACCCTAAAGGGTTTTTTTTTTTTTTTGCCGGAAGACTCTCCTCCGCGAACGTGGCGAGAAAGGAAGGGAAGAAATTTTTTTTTTTTTTTAGCGATCCTAGGGCGATCA	0.19	6.06	0.69
1747	GGGGACCAGGTGCCGTAAGCTGGGCCTGTGCACTAAATCGGAACCCTAAAGGGTTTTTTTTTTTTTTTGCTTGACGGGGAAAGCCGGCGAACGTGGCGAGAAAGGAATGACTCATATTTTTTTTTTTTTTTAGCGATCCTAGGGCGATCA	2.31	0.19	0.82
1748	GGGGACCAGGTGCCGTAAGACCTGGGTGCGCACTAAATCGGAACCCTAAAGGGTTTTTTTTTTTTTTTGCTTGACGGGGAAAGCCGGCGAACGTGGCGAATGACTCATGGAAGAAATTTTTTTTTTTTTTTAGCGATCCTAGGGCGATCA	0.6	0.1	0.84
1749	GGGGACCAGGTGCCGTAAGAGAAATTCAAGCACTAAATCGGAACCCTAAAGGGTTTTTTTTTTTTTTTGCTTGACGGGGAAAGCCGGCGAACGTGGATGACTCATAAGGGAAGAAATTTTTTTTTTTTTTTAGCGATCCTAGGGCGATCA	2.02	0.27	0.72
1750	GGGGACCAGGTGCCGTAAGGTGGGCTTGCGCACTAAATCGGAACCCTAAAGGGTTTTTTTTTTTTTTTGCTTGACGGGGAAAGCCGGCGAACATGACTCATAAGGAAGGGAAGAAATTTTTTTTTTTTTTTAGCGATCCTAGGGCGATCA	NaN	0.21	0.76
1751	GGGGACCAGGTGCCGTAAGGCGTAAAACGGCACTAAATCGGAACCCTAAAGGGTTTTTTTTTTTTTTTGCTTGACGGGGAAAGCCGGCGATGACTCATAGAAAGGAAGGGAAGAAATTTTTTTTTTTTTTTAGCGATCCTAGGGCGATCA	2.41	0.07	0.68
1752	GGGGACCAGGTGCCGTAAGCGGTGTGAATGCACTAAATCGGAACCCTAAAGGGTTTTTTTTTTTTTTTGCTTGACGGGGAAAGCCATGACTCATGGCGAGAAAGGAAGGGAAGAAATTTTTTTTTTTTTTTAGCGATCCTAGGGCGATCA	NaN	0.35	0.65
1753	GGGGACCAGGTGCCGTAAGATCTAACTAAGCACTAAATCGGAACCCTAAAGGGTTTTTTTTTTTTTTTGCTTGACGGGATGACTCATCGAACGTGGCGAGAAAGGAAGGGAAGAAATTTTTTTTTTTTTTTAGCGATCCTAGGGCGATCA	2.05	0.51	0.87
1754	GGGGACCAGGTGCCGTAAGTCAATCCCGTGCACTAAATCGGAACCCTAAAGGGTTTTTTTTTTTTTTTGCTATGACTCATAAGCCGGCGAACGTGGCGAGAAAGGAAGGGAAGAAATTTTTTTTTTTTTTTAGCGATCCTAGGGCGATCA	2.01	0.09	0.82
1755	GGGGACCAGGTGCCGTAAGAGGCAGCCGGGCACTAAATCGGAACCCTAAAGGGTTTTTTTTTTTTTTTATGACTCATGGAAAGCCGGCGAACGTGGCGAGAAAGGAAGGGAAGAAATTTTTTTTTTTTTTTAGCGATCCTAGGGCGATCA	NaN	0.31	0.83
1756	GGGGACCAGGTGCCGTAAGGGCACTAACTGCACTAAATCGGAACCCTAAAGGGTTTTTTTTTTTTTTTGCTTGACGGGGAAAGCCGGCGAACGTGGCGAGAAAGCCGGAACCGGCATTTTTTTTTTTTTTTAGCGATCCTAGGGCGATCA	0.16	0.14	0.82
1757	GGGGACCAGGTGCCGTAAGCCTAGTTAACGCACTAAATCGGAACCCTAAAGGGTTTTTTTTTTTTTTTGCTTGACGGGGAAAGCCGGCGAACGTGGGCCGGAACCGGCGGAAGAAATTTTTTTTTTTTTTTAGCGATCCTAGGGCGATCA	0.18	0.17	0.81
1758	GGGGACCAGGTGCCGTAAGCTGCTGACTAGCACTAAATCGGAACCCTAAAGGGTTTTTTTTTTTTTTTGCTTGACGGGGAAAGCCGGCGAACGGCCGGAACCGGCAAGGGAAGAAATTTTTTTTTTTTTTTAGCGATCCTAGGGCGATCA	0.15	0.19	0.77
1759	GGGGACCAGGTGCCGTAAGTAAACCCTGCGCACTAAATCGGAACCCTAAAGGGTTTTTTTTTTTTTTTGCTTGACGGGGAAAGCCGGCGGCCGGAACCGGCAAGGAAGGGAAGAAATTTTTTTTTTTTTTTAGCGATCCTAGGGCGATCA	0.1	0.12	0.79
1760	GGGGACCAGGTGCCGTAAGACACAGGAGAGCACTAAATCGGAACCCTAAAGGGTTTTTTTTTTTTTTTGCTTGACGGGGAAAGCCGGCCGGAACCGGCAGAAAGGAAGGGAAGAAATTTTTTTTTTTTTTTAGCGATCCTAGGGCGATCA	0.19	0.09	0.84
1761	GGGGACCAGGTGCCGTAAGGCTACCCATTGCACTAAATCGGAACCCTAAAGGGTTTTTTTTTTTTTTTGCTTGACGGGGAAAGCCGGAACCGGCGGCGAGAAAGGAAGGGAAGAAATTTTTTTTTTTTTTTAGCGATCCTAGGGCGATCA	0.13	0.13	0.77
1762	GGGGACCAGGTGCCGTAAGGTGTCATTTTGCACTAAATCGGAACCCTAAAGGGTTTTTTTTTTTTTTTGCTTGACGCCGGAACCGGCCGAACGTGGCGAGAAAGGAAGGGAAGAAATTTTTTTTTTTTTTTAGCGATCCTAGGGCGATCA	0.11	0.2	0.75
1763	GGGGACCAGGTGCCGTAAGGAGCGTAAGCGCACTAAATCGGAACCCTAAAGGGTTTTTTTTTTTTTTTGCCGGAACCGGCAAGCCGGCGAACGTGGCGAGAAAGGAAGGGAAGAAATTTTTTTTTTTTTTTAGCGATCCTAGGGCGATCA	0.15	0.17	0.74
1764	GGGGACCAGGTGCCGTAAGCCTGACTACTAAGCCGGACAGGCAGCGACAGCCCTTTTTTTTTTTTTTTTCCTAGCTGCGTCCTCGTCTTCACCGGTCGCGGAAGACTCTCCTCCGTTTTTTTTTTTTTTTTCGCGATCCTAGGGCGATCA	0.23	1.48	0.7
1765	GGGGACCAGGTGCCGTAAGGTTAACAGACAAGCCGGACAGGCAGCGACAGCCCTTTTTTTTTTTTTTTTCCTAGCTGCGTCCTCGTCTTCACGGAAGACTCTCCTCCGACGCAGATTTTTTTTTTTTTTTTCGCGATCCTAGGGCGATCA	0.22	5.27	0.75
1766	GGGGACCAGGTGCCGTAAGTGTAGTGAATAAGCCGGACAGGCAGCGACAGCCCTTTTTTTTTTTTTTTTCCTAGCTGCGTCCTCGTCTCGGAAGACTCTCCTCCGGAAACGCAGATTTTTTTTTTTTTTTTCGCGATCCTAGGGCGATCA	0.29	8.37	0.68
1767	GGGGACCAGGTGCCGTAAGATTGACAGCCAAGCCGGACAGGCAGCGACAGCCCTTTTTTTTTTTTTTTTCCTAGCTGCGTCCTCCGGAAGACTCTCCTCCGTCCTGAAACGCAGATTTTTTTTTTTTTTTTCGCGATCCTAGGGCGATCA	0.24	3.04	0.74
1768	GGGGACCAGGTGCCGTAAGCAGGATTAACAAGCCGGACAGGCAGCGACAGCCCTTTTTTTTTTTTTTTTCCTAGCTGCGTCCGGAAGACTCTCCTCCGCGTTCCTGAAACGCAGATTTTTTTTTTTTTTTTCGCGATCCTAGGGCGATCA	0.36	4.81	0.7
1769	GGGGACCAGGTGCCGTAAGGAATGCCTGGAAGCCGGACAGGCAGCGACAGCCCTTTTTTTTTTTTTTTTCCTAGCTGCGGAAGACTCTCCTCCGGTCGCGTTCCTGAAACGCAGATTTTTTTTTTTTTTTTCGCGATCCTAGGGCGATCA	0.25	3.36	0.72
1770	GGGGACCAGGTGCCGTAAGAACTAAGCTAAAGCCGGACAGGCAGCGACAGCCCTTTTTTTTTTTTTTTTCCGGAAGACTCTCCTCCGTTCACCGGTCGCGTTCCTGAAACGCAGATTTTTTTTTTTTTTTTCGCGATCCTAGGGCGATCA	0.27	3.6	0.75
1771	GGGGACCAGGTGCCGTAAGGCTAAGCGGCAAGCCGGACAGGCAGCGACAGCCCTTTTTTTTTTTTTTTTCCTAGCTGCGTCCTCGTCTTCACCGGTCGCGTTCCTGATGACTCATTTTTTTTTTTTTTTTTCGCGATCCTAGGGCGATCA	2.31	0.1	0.76
1772	GGGGACCAGGTGCCGTAAGCTCAAGAGCGAAGCCGGACAGGCAGCGACAGCCCTTTTTTTTTTTTTTTTCCTAGCTGCGTCCTCGTCTTCACCGGTCGCATGACTCATACGCAGATTTTTTTTTTTTTTTTCGCGATCCTAGGGCGATCA	1.89	0.11	0.78
1773	GGGGACCAGGTGCCGTAAGTAACCCGTCAAAGCCGGACAGGCAGCGACAGCCCTTTTTTTTTTTTTTTTCCTAGCTGCGTCCTCGTCTTCACCGGTATGACTCATGAAACGCAGATTTTTTTTTTTTTTTTCGCGATCCTAGGGCGATCA	1.72	0.16	0.66
1774	GGGGACCAGGTGCCGTAAGGGCGTACATGAAGCCGGACAGGCAGCGACAGCCCTTTTTTTTTTTTTTTTCCTAGCTGCGTCCTCGTCTTCACATGACTCATTCCTGAAACGCAGATTTTTTTTTTTTTTTTCGCGATCCTAGGGCGATCA	1.04	0.13	0.75
1775	GGGGACCAGGTGCCGTAAGAGAAGCAGGCAAGCCGGACAGGCAGCGACAGCCCTTTTTTTTTTTTTTTTCCTAGCTGCGTCCTCGTCTTATGACTCATCGTTCCTGAAACGCAGATTTTTTTTTTTTTTTTCGCGATCCTAGGGCGATCA	3.65	0.18	0.75
1776	GGGGACCAGGTGCCGTAAGAACCTCCCGTAAGCCGGACAGGCAGCGACAGCCCTTTTTTTTTTTTTTTTCCTAGCTGCGTCCTCGATGACTCATGTCGCGTTCCTGAAACGCAGATTTTTTTTTTTTTTTTCGCGATCCTAGGGCGATCA	1.41	0.11	0.7
1777	GGGGACCAGGTGCCGTAAGTGCGTAGTAAAAGCCGGACAGGCAGCGACAGCCCTTTTTTTTTTTTTTTTCCTAGCTGCATGACTCATTTCACCGGTCGCGTTCCTGAAACGCAGATTTTTTTTTTTTTTTTCGCGATCCTAGGGCGATCA	1.5	0.09	0.62
1778	GGGGACCAGGTGCCGTAAGGCTCACTACGAAGCCGGACAGGCAGCGACAGCCCTTTTTTTTTTTTTTTTCCATGACTCATCCTCGTCTTCACCGGTCGCGTTCCTGAAACGCAGATTTTTTTTTTTTTTTTCGCGATCCTAGGGCGATCA	1.46	0.09	0.69
1779	GGGGACCAGGTGCCGTAAGTCCATGAGAGAAGCCGGACAGGCAGCGACAGCCCTTTTTTTTTTTTTTTATGACTCATCGTCCTCGTCTTCACCGGTCGCGTTCCTGAAACGCAGATTTTTTTTTTTTTTTTCGCGATCCTAGGGCGATCA	3.92	0.07	0.73
1780	GGGGACCAGGTGCCGTAAGACCTGGATCAAAGCCGGACAGGCAGCGACAGCCCTTTTTTTTTTTTTTTTCCTAGCTGCGTCCTCGTCTTCACCGGTCGCGTTCGCCGGAACCGGCTTTTTTTTTTTTTTTTCGCGATCCTAGGGCGATCA	0.24	0.08	0.7
1781	GGGGACCAGGTGCCGTAAGTTGAACATAGAAGCCGGACAGGCAGCGACAGCCCTTTTTTTTTTTTTTTTCCTAGCTGCGTCCTCGTCTTCACCGGTGCCGGAACCGGCACGCAGATTTTTTTTTTTTTTTTCGCGATCCTAGGGCGATCA	0.23	0.09	0.77
1782	GGGGACCAGGTGCCGTAAGCCGTGAACTTAAGCCGGACAGGCAGCGACAGCCCTTTTTTTTTTTTTTTTCCTAGCTGCGTCCTCGTCTTCACCGCCGGAACCGGCGAAACGCAGATTTTTTTTTTTTTTTTCGCGATCCTAGGGCGATCA	0.23	0.07	0.64
1783	GGGGACCAGGTGCCGTAAGGCGCTTGATTAAGCCGGACAGGCAGCGACAGCCCTTTTTTTTTTTTTTTTCCTAGCTGCGTCCTCGTCTTGCCGGAACCGGCTCCTGAAACGCAGATTTTTTTTTTTTTTTTCGCGATCCTAGGGCGATCA	0.2	0.09	0.63
1784	GGGGACCAGGTGCCGTAAGCGCGCTGTCCAAGCCGGACAGGCAGCGACAGCCCTTTTTTTTTTTTTTTTCCTAGCTGCGTCCTCGTGCCGGAACCGGCCGTTCCTGAAACGCAGATTTTTTTTTTTTTTTTCGCGATCCTAGGGCGATCA	0.24	0.07	0.68
1785	GGGGACCAGGTGCCGTAAGACGTGCCGAAAAGCCGGACAGGCAGCGACAGCCCTTTTTTTTTTTTTTTTCCTAGCTGCGTCCGCCGGAACCGGCGTCGCGTTCCTGAAACGCAGATTTTTTTTTTTTTTTTCGCGATCCTAGGGCGATCA	0.2	0.07	0.58
1786	GGGGACCAGGTGCCGTAAGGGGAGCTTCAAAGCCGGACAGGCAGCGACAGCCCTTTTTTTTTTTTTTTTCCTAGCGCCGGAACCGGCTTCACCGGTCGCGTTCCTGAAACGCAGATTTTTTTTTTTTTTTTCGCGATCCTAGGGCGATCA	0.29	0.11	0.75
1787	GGGGACCAGGTGCCGTAAGGCTCGATCAGAAGCCGGACAGGCAGCGACAGCCCTTTTTTTTTTTTTTTGCCGGAACCGGCCCTCGTCTTCACCGGTCGCGTTCCTGAAACGCAGATTTTTTTTTTTTTTTTCGCGATCCTAGGGCGATCA	0.25	0.12	0.67
1788	GGGGACCAGGTGCCGTAAGGTCTATCGGTGTTTTTTTTTTTTTTTCTAAAGGGAGCCCCCCGGAAGACTCTCCTCCGGGTTTTTTTTTTTTTTTGGCGAGAAAGGAAGGGAAGAAAGCGCCACCTAGCGGAAGCGATCCTAGGGCGATCA	NaN	NaN	0.64
1789	GGGGACCAGGTGCCGTAAGGGTTGCGAACGTTTTTTTTTTTTTTTCTAACGGAAGACTCTCCTCCGGAGCTTGACGGGGTTTTTTTTTTTTTTTGGCGAGAAAGGAAGGGAAGAAAGCGCCACCTAGCGGAAGCGATCCTAGGGCGATCA	0.09	5.6	0.56
1790	GGGGACCAGGTGCCGTAAGAGAGTGACCCGTTTTTTTTTTTTTTTCCGGAAGACTCTCCTCCGTTAGAGCTTGACGGGGTTTTTTTTTTTTTTTGGCGAGAAAGGAAGGGAAGAAAGCGCCACCTAGCGGAAGCGATCCTAGGGCGATCA	0.08	4.37	0.57
1791	GGGGACCAGGTGCCGTAAGCGCCTCGTAGGTTTTTTTTTTTTTTTCTAAAGGGAGCCCCCGATTTAGAATGACTCATGGTTTTTTTTTTTTTTTGGCGAGAAAGGAAGGGAAGAAAGCGCCACCTAGCGGAAGCGATCCTAGGGCGATCA	0.72	0.06	0.49
1792	GGGGACCAGGTGCCGTAAGGTAAAACTCGGTTTTTTTTTTTTTTTCTAAAGGGAGCCATGACTCATGAGCTTGACGGGGTTTTTTTTTTTTTTTGGCGAGAAAGGAAGGGAAGAAAGCGCCACCTAGCGGAAGCGATCCTAGGGCGATCA	NaN	NaN	0.45
1793	GGGGACCAGGTGCCGTAAGGCAACGTTTCGTTTTTTTTTTTTTTTCTAAAGGGAATGACTCATTTAGAGCTTGACGGGGTTTTTTTTTTTTTTTGGCGAGAAAGGAAGGGAAGAAAGCGCCACCTAGCGGAAGCGATCCTAGGGCGATCA	0.84	0.09	0.55
1794	GGGGACCAGGTGCCGTAAGCCCAAGGAGGGTTTTTTTTTTTTTTTCTATGACTCATCCCCGATTTAGAGCTTGACGGGGTTTTTTTTTTTTTTTGGCGAGAAAGGAAGGGAAGAAAGCGCCACCTAGCGGAAGCGATCCTAGGGCGATCA	1.88	0.08	0.43
1795	GGGGACCAGGTGCCGTAAGTCTTAGAGACGTTTTTTTTTTTTTTTCTAAAGGGAGCCCCCGATTTGCCGGAACCGGCGGTTTTTTTTTTTTTTTGGCGAGAAAGGAAGGGAAGAAAGCGCCACCTAGCGGAAGCGATCCTAGGGCGATCA	NaN	0.12	0.33
1796	GGGGACCAGGTGCCGTAAGAAGGCTAATTGTTTTTTTTTTTTTTTCTAAAGGGAGCCGGAACCGGCGAGCTTGACGGGGTTTTTTTTTTTTTTTGGCGAGAAAGGAAGGGAAGAAAGCGCCACCTAGCGGAAGCGATCCTAGGGCGATCA	NaN	NaN	0.57
1797	GGGGACCAGGTGCCGTAAGAATTTCGATCGTTTTTTTTTTTTTTTCTAAAGGCCGGAACCGGCTTAGAGCTTGACGGGGTTTTTTTTTTTTTTTGGCGAGAAAGGAAGGGAAGAAAGCGCCACCTAGCGGAAGCGATCCTAGGGCGATCA	NaN	0.15	0.58
1798	GGGGACCAGGTGCCGTAAGGCGCACGTCCATTTTTTTTTTTTTTTGACAGCCCTGACAGACGGAAGACTCTCCTCCGCGTTTTTTTTTTTTTTTGTCGCGTTCCTGAAACGCAGATGTGCCTACAGCCGCACGCGATCCTAGGGCGATCA	0.11	2.52	0.73
1799	GGGGACCAGGTGCCGTAAGCAATAGGTCTATTTTTTTTTTTTTTTGACACGGAAGACTCTCCTCCGTCTCCTAGCTGCGTTTTTTTTTTTTTTTGTCGCGTTCCTGAAACGCAGATGTGCCTACAGCCGCACGCGATCCTAGGGCGATCA	0.11	1.58	0.8
1800	GGGGACCAGGTGCCGTAAGGGCGCTATGAATTTTTTTTTTTTTTTGCGGAAGACTCTCCTCCGGACTCTCCTAGCTGCGTTTTTTTTTTTTTTTGTCGCGTTCCTGAAACGCAGATGTGCCTACAGCCGCACGCGATCCTAGGGCGATCA	0.16	4.14	0.76
1801	GGGGACCAGGTGCCGTAAGGGGACATACTATTTTTTTTTTTTTTTGACAGCCCTGACAGACAAGACTCATGACTCATCGTTTTTTTTTTTTTTTGTCGCGTTCCTGAAACGCAGATGTGCCTACAGCCGCACGCGATCCTAGGGCGATCA	2	0.11	0.81
1802	GGGGACCAGGTGCCGTAAGAGAACAATCAATTTTTTTTTTTTTTTGACAGCCCTGACATGACTCATTCTCCTAGCTGCGTTTTTTTTTTTTTTTGTCGCGTTCCTGAAACGCAGATGTGCCTACAGCCGCACGCGATCCTAGGGCGATCA	1.1	0.09	0.75
1803	GGGGACCAGGTGCCGTAAGTTACTCTCGGATTTTTTTTTTTTTTTGACAGCCCTATGACTCATGACTCTCCTAGCTGCGTTTTTTTTTTTTTTTGTCGCGTTCCTGAAACGCAGATGTGCCTACAGCCGCACGCGATCCTAGGGCGATCA	1.59	0.06	0.73
1804	GGGGACCAGGTGCCGTAAGAAAGAAGGATATTTTTTTTTTTTTTTGAATGACTCATCAGACAAGACTCTCCTAGCTGCGTTTTTTTTTTTTTTTGTCGCGTTCCTGAAACGCAGATGTGCCTACAGCCGCACGCGATCCTAGGGCGATCA	2.2	0.07	0.77
1805	GGGGACCAGGTGCCGTAAGTATGAAGGTCATTTTTTTTTTTTTTTGACAGCCCTGACAGACAAGAGCCGGAACCGGCCGTTTTTTTTTTTTTTTGTCGCGTTCCTGAAACGCAGATGTGCCTACAGCCGCACGCGATCCTAGGGCGATCA	0.32	0.08	0.57
1806	GGGGACCAGGTGCCGTAAGCATTGAAACTATTTTTTTTTTTTTTTGACAGCCCTGCCGGAACCGGCTCTCCTAGCTGCGTTTTTTTTTTTTTTTGTCGCGTTCCTGAAACGCAGATGTGCCTACAGCCGCACGCGATCCTAGGGCGATCA	0.27	0.07	0.78
1807	GGGGACCAGGTGCCGTAAGATTGATCACAATTTTTTTTTTTTTTTGACAGCGCCGGAACCGGCGACTCTCCTAGCTGCGTTTTTTTTTTTTTTTGTCGCGTTCCTGAAACGCAGATGTGCCTACAGCCGCACGCGATCCTAGGGCGATCA	0.41	0.07	0.8
1808	GGGGACCAGGTGCCGTAAGGCGTCGAAGGGTTTTTTTTTTTTTTTCTAAAGGGAGCCCCCGATTTAGAGCTTGACGGGGAAAGCCGGCGAACGTGGCGCGGAAGACTCTCCTCCGATTTTTTTTTTTTTTTAGCGATCCTAGGGCGATCA	0.11	4.94	0.77
1809	GGGGACCAGGTGCCGTAAGACCTGTAGGCGTTTTTTTTTTTTTTTCTAAAGGGAGCCCCCGATTTAGAGCTTGACGGGGAAAGCCGGCGAACGGAAGACTCTCCTCCGGGAAGAAATTTTTTTTTTTTTTTAGCGATCCTAGGGCGATCA	0.11	4.73	0.69
1810	GGGGACCAGGTGCCGTAAGCCTTTTGTGGGTTTTTTTTTTTTTTTCTAAAGGGAGCCCCCGATTTAGAGCTTGACGGGGAAAGCCGGAAGACTCTCCTCCGAAGGAAGGGAAGAAATTTTTTTTTTTTTTTAGCGATCCTAGGGCGATCA	0.11	9.47	0.59
1811	GGGGACCAGGTGCCGTAAGTCGACAGCCGGTTTTTTTTTTTTTTTCTAAAGGGAGCCCCCGATTTAGAGCTTGACGGCGGAAGACTCTCCTCCGGGCGAGAAAGGAAGGGAAGAAATTTTTTTTTTTTTTTAGCGATCCTAGGGCGATCA	0.05	3.68	0.73
1812	GGGGACCAGGTGCCGTAAGCTTGCGCCGCGTTTTTTTTTTTTTTTCTAAAGGGAGCCCCCGATTTAGAGCCGGAAGACTCTCCTCCGCGAACGTGGCGAGAAAGGAAGGGAAGAAATTTTTTTTTTTTTTTAGCGATCCTAGGGCGATCA	0.07	5.13	0.7
1813	GGGGACCAGGTGCCGTAAGGTTACTTGTAGTTTTTTTTTTTTTTTCTAAAGGGAGCCCCCCGGAAGACTCTCCTCCGGGAAAGCCGGCGAACGTGGCGAGAAAGGAAGGGAAGAAATTTTTTTTTTTTTTTAGCGATCCTAGGGCGATCA	0.15	6.02	0.94
1814	GGGGACCAGGTGCCGTAAGTCTATCGGACGTTTTTTTTTTTTTTTCTAAAGGGAGCCGGAAGACTCTCCTCCGACGGGGAAAGCCGGCGAACGTGGCGAGAAAGGAAGGGAAGAAATTTTTTTTTTTTTTTAGCGATCCTAGGGCGATCA	0.09	9.61	0.91
1815	GGGGACCAGGTGCCGTAAGTGTGAATCACGTTTTTTTTTTTTTTTCTAACGGAAGACTCTCCTCCGGAGCTTGACGGGGAAAGCCGGCGAACGTGGCGAGAAAGGAAGGGAAGAAATTTTTTTTTTTTTTTAGCGATCCTAGGGCGATCA	0.12	4.84	0.72
1816	GGGGACCAGGTGCCGTAAGATGCGGTCACGTTTTTTTTTTTTTTTCTAAAGGGAGCCCCCGATTTAGAGCTTGACGGGGAAAGCCGGCGAACGTGGCGAGAAAGGAATGACTCATATTTTTTTTTTTTTTTAGCGATCCTAGGGCGATCA	1.86	0.12	0.69
1817	GGGGACCAGGTGCCGTAAGCTAAGCTACGGTTTTTTTTTTTTTTTCTAAAGGGAGCCCCCGATTTAGAGCTTGACGGGGAAAGCCGGCGAACGTGGCGAATGACTCATGGAAGAAATTTTTTTTTTTTTTTAGCGATCCTAGGGCGATCA	0.53	0.19	0.6
1818	GGGGACCAGGTGCCGTAAGTTCAGCGCTAGTTTTTTTTTTTTTTTCTAAAGGGAGCCCCCGATTTAGAGCTTGACGGGGAAAGCCGGCGAACATGACTCATAAGGAAGGGAAGAAATTTTTTTTTTTTTTTAGCGATCCTAGGGCGATCA	0.82	0.19	0.8
1819	GGGGACCAGGTGCCGTAAGATACCGATCGGTTTTTTTTTTTTTTTCTAAAGGGAGCCCCCGATTTAGAGCTTGACGGGGAAAGCCATGACTCATGGCGAGAAAGGAAGGGAAGAAATTTTTTTTTTTTTTTAGCGATCCTAGGGCGATCA	0.4	0.16	0.64
1820	GGGGACCAGGTGCCGTAAGCGCGGATACTGTTTTTTTTTTTTTTTCTAAAGGGAGCCCCCGATTTAGAGCTTGACGGGATGACTCATCGAACGTGGCGAGAAAGGAAGGGAAGAAATTTTTTTTTTTTTTTAGCGATCCTAGGGCGATCA	2.1	0.05	0.59
1821	GGGGACCAGGTGCCGTAAGCAGCTTAACCGTTTTTTTTTTTTTTTCTAAAGGGAGCCCCCGATTTAGAATGACTCATGGAAAGCCGGCGAACGTGGCGAGAAAGGAAGGGAAGAAATTTTTTTTTTTTTTTAGCGATCCTAGGGCGATCA	0.64	0.21	0.73
1822	GGGGACCAGGTGCCGTAAGAATTACCACTGTTTTTTTTTTTTTTTCTAAAGGGAGCCCCCGATTATGACTCATACGGGGAAAGCCGGCGAACGTGGCGAGAAAGGAAGGGAAGAAATTTTTTTTTTTTTTTAGCGATCCTAGGGCGATCA	2.81	0.17	0.61
1823	GGGGACCAGGTGCCGTAAGTGCCTGAATGGTTTTTTTTTTTTTTTCTAAAGGGAGCCATGACTCATGAGCTTGACGGGGAAAGCCGGCGAACGTGGCGAGAAAGGAAGGGAAGAAATTTTTTTTTTTTTTTAGCGATCCTAGGGCGATCA	0.4	0.15	0.75
1824	GGGGACCAGGTGCCGTAAGCATGGGCTCAGTTTTTTTTTTTTTTTCTAAAATGACTCATCGATTTAGAGCTTGACGGGGAAAGCCGGCGAACGTGGCGAGAAAGGAAGGGAAGAAATTTTTTTTTTTTTTTAGCGATCCTAGGGCGATCA	1.46	0.12	0.6
1825	GGGGACCAGGTGCCGTAAGATGGTACAAAGTTTTTTTTTTTTTTTCTAAAGGGAGCCCCCGATTTAGAGCTTGACGGGGAAAGCCGGCGAACGTGGCGAGAAAGCCGGAACCGGCATTTTTTTTTTTTTTTAGCGATCCTAGGGCGATCA	0.14	0.18	0.7
1826	GGGGACCAGGTGCCGTAAGGCCCTCACCGGTTTTTTTTTTTTTTTCTAAAGGGAGCCCCCGATTTAGAGCTTGACGGGGAAAGCCGGCGAACGTGGGCCGGAACCGGCGGAAGAAATTTTTTTTTTTTTTTAGCGATCCTAGGGCGATCA	0.09	0.16	0.64
1827	GGGGACCAGGTGCCGTAAGGTACGGTTCTGTTTTTTTTTTTTTTTCTAAAGGGAGCCCCCGATTTAGAGCTTGACGGGGAAAGCCGGCGGCCGGAACCGGCAAGGAAGGGAAGAAATTTTTTTTTTTTTTTAGCGATCCTAGGGCGATCA	0.1	0.24	0.72
1828	GGGGACCAGGTGCCGTAAGAAAGCAATCCGTTTTTTTTTTTTTTTCTAAAGGGAGCCCCCGATTTAGAGCTTGACGGGGAAAGCCGGAACCGGCGGCGAGAAAGGAAGGGAAGAAATTTTTTTTTTTTTTTAGCGATCCTAGGGCGATCA	0.12	0.06	0.84
1829	GGGGACCAGGTGCCGTAAGATGATTTTCTGTTTTTTTTTTTTTTTCTAAAGGGAGCCCCCGATTTAGAGCTTGACGCCGGAACCGGCCGAACGTGGCGAGAAAGGAAGGGAAGAAATTTTTTTTTTTTTTTAGCGATCCTAGGGCGATCA	0.12	0.15	0.71
1830	GGGGACCAGGTGCCGTAAGACATGAGACAGTTTTTTTTTTTTTTTCTAAAGGGAGCCCCCGATTTGCCGGAACCGGCGGAAAGCCGGCGAACGTGGCGAGAAAGGAAGGGAAGAAATTTTTTTTTTTTTTTAGCGATCCTAGGGCGATCA	0.08	0.16	0.64
1831	GGGGACCAGGTGCCGTAAGTTGCGTAGGGGTTTTTTTTTTTTTTTCTAAAGGGAGCCCCCGGCCGGAACCGGCACGGGGAAAGCCGGCGAACGTGGCGAGAAAGGAAGGGAAGAAATTTTTTTTTTTTTTTAGCGATCCTAGGGCGATCA	0.15	0.42	0.77
1832	GGGGACCAGGTGCCGTAAGAAGTGGGTCAGTTTTTTTTTTTTTTTCTAAAGGGAGCCGGAACCGGCGAGCTTGACGGGGAAAGCCGGCGAACGTGGCGAGAAAGGAAGGGAAGAAATTTTTTTTTTTTTTTAGCGATCCTAGGGCGATCA	0.04	0.24	0.77
1833	GGGGACCAGGTGCCGTAAGTCGTTCTGTAGTTTTTTTTTTTTTTTCTGCCGGAACCGGCCGATTTAGAGCTTGACGGGGAAAGCCGGCGAACGTGGCGAGAAAGGAAGGGAAGAAATTTTTTTTTTTTTTTAGCGATCCTAGGGCGATCA	0.09	0.24	0.59
1834	GGGGACCAGGTGCCGTAAGGATCTTCATTATTTTTTTTTTTTTTTGACAGCCCTGACAGACAAGACTCTCCTAGCTGCGTCCTCGTCTTCACCGGTCGCGGAAGACTCTCCTCCGTTTTTTTTTTTTTTTTCGCGATCCTAGGGCGATCA	0.32	1.62	0.79
1835	GGGGACCAGGTGCCGTAAGACAGACCGTAATTTTTTTTTTTTTTTGACAGCCCTGACAGACAAGACTCTCCTAGCTGCGTCCTCGTCTTCACGGAAGACTCTCCTCCGACGCAGATTTTTTTTTTTTTTTTCGCGATCCTAGGGCGATCA	0.2	5.42	0.72
1836	GGGGACCAGGTGCCGTAAGCAGAACGGTTATTTTTTTTTTTTTTTGACAGCCCTGACAGACAAGACTCTCCTAGCTGCGTCCTCCGGAAGACTCTCCTCCGTCCTGAAACGCAGATTTTTTTTTTTTTTTTCGCGATCCTAGGGCGATCA	0.21	3.18	0.77
1837	GGGGACCAGGTGCCGTAAGCGGCAAATAGATTTTTTTTTTTTTTTGACAGCCCTGACAGACAAGACTCTCCTAGCTGCGGAAGACTCTCCTCCGGTCGCGTTCCTGAAACGCAGATTTTTTTTTTTTTTTTCGCGATCCTAGGGCGATCA	0.14	3.43	0.72
1838	GGGGACCAGGTGCCGTAAGGTTAGGTGCTATTTTTTTTTTTTTTTGACAGCCCTGACAGACAAGACTCTCCGGAAGACTCTCCTCCGTTCACCGGTCGCGTTCCTGAAACGCAGATTTTTTTTTTTTTTTTCGCGATCCTAGGGCGATCA	0.23	3.73	0.81
1839	GGGGACCAGGTGCCGTAAGAGACCAACCTATTTTTTTTTTTTTTTGACAGCCCTGACAGACGGAAGACTCTCCTCCGCGTCCTCGTCTTCACCGGTCGCGTTCCTGAAACGCAGATTTTTTTTTTTTTTTTCGCGATCCTAGGGCGATCA	0.13	1.73	0.83
1840	GGGGACCAGGTGCCGTAAGGACCTTTGTCATTTTTTTTTTTTTTTGACAGCCCTGACGGAAGACTCTCCTCCGGCTGCGTCCTCGTCTTCACCGGTCGCGTTCCTGAAACGCAGATTTTTTTTTTTTTTTTCGCGATCCTAGGGCGATCA	0.17	2.57	0.77
1841	GGGGACCAGGTGCCGTAAGCTCTTCGCCAATTTTTTTTTTTTTTTGACACGGAAGACTCTCCTCCGTCTCCTAGCTGCGTCCTCGTCTTCACCGGTCGCGTTCCTGAAACGCAGATTTTTTTTTTTTTTTTCGCGATCCTAGGGCGATCA	0.1	1.6	0.68
1842	GGGGACCAGGTGCCGTAAGAATTGTAGCAATTTTTTTTTTTTTTTGACAGCCCTGACAGACAAGACTCTCCTAGCTGCGTCCTCGTCTTCACCGGTCGCGTTCCTGATGACTCATTTTTTTTTTTTTTTTTCGCGATCCTAGGGCGATCA	2.3	0.13	0.75
1843	GGGGACCAGGTGCCGTAAGCAGTCCTCCCATTTTTTTTTTTTTTTGACAGCCCTGACAGACAAGACTCTCCTAGCTGCGTCCTCGTCTTCACCGGTCGCATGACTCATACGCAGATTTTTTTTTTTTTTTTCGCGATCCTAGGGCGATCA	1.59	0.08	0.82
1844	GGGGACCAGGTGCCGTAAGAAAGCGTAATATTTTTTTTTTTTTTTGACAGCCCTGACAGACAAGACTCTCCTAGCTGCGTCCTCGTCTTCACATGACTCATTCCTGAAACGCAGATTTTTTTTTTTTTTTTCGCGATCCTAGGGCGATCA	0.88	0.2	0.75
1845	GGGGACCAGGTGCCGTAAGGACCAGTACAATTTTTTTTTTTTTTTGACAGCCCTGACAGACAAGACTCTCCTAGCTGCGTCCTCGATGACTCATGTCGCGTTCCTGAAACGCAGATTTTTTTTTTTTTTTTCGCGATCCTAGGGCGATCA	1.17	0.12	0.74
1846	GGGGACCAGGTGCCGTAAGCAATCGTTGCATTTTTTTTTTTTTTTGACAGCCCTGACAGACAAGACTCTCCTAGCTGCATGACTCATTTCACCGGTCGCGTTCCTGAAACGCAGATTTTTTTTTTTTTTTTCGCGATCCTAGGGCGATCA	1.24	0.09	0.67
1847	GGGGACCAGGTGCCGTAAGCCTCGCAACCATTTTTTTTTTTTTTTGACAGCCCTGACAGACAAGACTCATGACTCATCGTCCTCGTCTTCACCGGTCGCGTTCCTGAAACGCAGATTTTTTTTTTTTTTTTCGCGATCCTAGGGCGATCA	1.41	0.07	0.67
1848	GGGGACCAGGTGCCGTAAGGTACGTCAGAATTTTTTTTTTTTTTTGACAGCCCTGACAGACAAGATGACTCATGCTGCGTCCTCGTCTTCACCGGTCGCGTTCCTGAAACGCAGATTTTTTTTTTTTTTTTCGCGATCCTAGGGCGATCA	1.44	0.08	0.73
1849	GGGGACCAGGTGCCGTAAGAGTGCAACTAATTTTTTTTTTTTTTTGACAGCCCTGACATGACTCATTCTCCTAGCTGCGTCCTCGTCTTCACCGGTCGCGTTCCTGAAACGCAGATTTTTTTTTTTTTTTTCGCGATCCTAGGGCGATCA	1.08	0.1	0.75
1850	GGGGACCAGGTGCCGTAAGAACAGTTCTTATTTTTTTTTTTTTTTGACAGATGACTCATACAAGACTCTCCTAGCTGCGTCCTCGTCTTCACCGGTCGCGTTCCTGAAACGCAGATTTTTTTTTTTTTTTTCGCGATCCTAGGGCGATCA	2.57	0.11	0.8
1851	GGGGACCAGGTGCCGTAAGTGCGACCTTCATTTTTTTTTTTTTTTGACAGCCCTGACAGACAAGACTCTCCTAGCTGCGTCCTCGTCTTCACCGGTCGCGTTCGCCGGAACCGGCTTTTTTTTTTTTTTTTCGCGATCCTAGGGCGATCA	0.16	0.09	0.72
1852	GGGGACCAGGTGCCGTAAGAAAGGACTTAATTTTTTTTTTTTTTTGACAGCCCTGACAGACAAGACTCTCCTAGCTGCGTCCTCGTCTTCACCGGTGCCGGAACCGGCACGCAGATTTTTTTTTTTTTTTTCGCGATCCTAGGGCGATCA	0.27	0.14	0.77
1853	GGGGACCAGGTGCCGTAAGCCTTGCTTCAATTTTTTTTTTTTTTTGACAGCCCTGACAGACAAGACTCTCCTAGCTGCGTCCTCGTCTTGCCGGAACCGGCTCCTGAAACGCAGATTTTTTTTTTTTTTTTCGCGATCCTAGGGCGATCA	0.18	0.1	0.66
1854	GGGGACCAGGTGCCGTAAGATAGCCGCCAATTTTTTTTTTTTTTTGACAGCCCTGACAGACAAGACTCTCCTAGCTGCGTCCGCCGGAACCGGCGTCGCGTTCCTGAAACGCAGATTTTTTTTTTTTTTTTCGCGATCCTAGGGCGATCA	0.14	0.08	0.74
1855	GGGGACCAGGTGCCGTAAGCCACTTGCCAATTTTTTTTTTTTTTTGACAGCCCTGACAGACAAGACTCTCCTAGCGCCGGAACCGGCTTCACCGGTCGCGTTCCTGAAACGCAGATTTTTTTTTTTTTTTTCGCGATCCTAGGGCGATCA	0.2	0.1	0.62
1856	GGGGACCAGGTGCCGTAAGCTCTCATTAGATTTTTTTTTTTTTTTGACAGCCCTGACAGACAAGAGCCGGAACCGGCCGTCCTCGTCTTCACCGGTCGCGTTCCTGAAACGCAGATTTTTTTTTTTTTTTTCGCGATCCTAGGGCGATCA	0.19	0.09	0.65
1857	GGGGACCAGGTGCCGTAAGCAGGGTTTGAATTTTTTTTTTTTTTTGACAGCCCTGACAGACGCCGGAACCGGCGCTGCGTCCTCGTCTTCACCGGTCGCGTTCCTGAAACGCAGATTTTTTTTTTTTTTTTCGCGATCCTAGGGCGATCA	0.25	0.08	0.8
1858	GGGGACCAGGTGCCGTAAGAAGTGGCCCTATTTTTTTTTTTTTTTGACAGCCCTGCCGGAACCGGCTCTCCTAGCTGCGTCCTCGTCTTCACCGGTCGCGTTCCTGAAACGCAGATTTTTTTTTTTTTTTTCGCGATCCTAGGGCGATCA	0.16	0.09	0.83
1859	GGGGACCAGGTGCCGTAAGCTTAGAACTTATTTTTTTTTTTTTTTGAGCCGGAACCGGCACAAGACTCTCCTAGCTGCGTCCTCGTCTTCACCGGTCGCGTTCCTGAAACGCAGATTTTTTTTTTTTTTTTCGCGATCCTAGGGCGATCA	0.17	0.12	0.67
1860	GGGGACCAGGTGCCGTAAGCGTTGAAGTGGCACTAAATCGGAACCCTAAAGGGAGCCCCCGATTTAGAGCTTGACGGGGAACGGAAGACTCTCCTCCGCGGAAGACTCTCCTCCGAGCGCCACCTAGCGGAAGCGATCCTAGGGCGATCA	0.26	7.96	1.03
1861	GGGGACCAGGTGCCGTAAGCGTACATGCAGCACTAAATCGGAACCCTAAAGGGAGCCCCCGATTTAGAGCTTGACGGGGAACGGAAGACTCTCCTCCGCGGAAGACTCTCCTCCGATTTTTTTTTTTTTTTAGCGATCCTAGGGCGATCA	0.2	5.16	0.9
1862	GGGGACCAGGTGCCGTAAGTCGCTGCTAGGCACTAAATCGGAACCCTAAAGGGAGCCCCCGATTTAGAGCTTGACGGGGCGGAAGACTCTCCTCCGCGCGGAAGACTCTCCTCCGAGCGCCACCTAGCGGAAGCGATCCTAGGGCGATCA	0.26	6.26	1.09
1863	GGGGACCAGGTGCCGTAAGGCGACAAGCCGCACTAAATCGGAACCCTAAAGGGAGCCCCCGATTTAGAGCTTGACGGGGCGGAAGACTCTCCTCCGCGCGGAAGACTCTCCTCCGATTTTTTTTTTTTTTTAGCGATCCTAGGGCGATCA	0.2	5.16	0.81
1864	GGGGACCAGGTGCCGTAAGACCCATGCCCGCACTAAATCGGAACCCTAAAGGGAGCCCCCGATTTAGAGCTTGACGGCGGAAGACTCTCCTCCGGGCGCGGAAGACTCTCCTCCGAGCGCCACCTAGCGGAAGCGATCCTAGGGCGATCA	0.36	6.85	1.2
1865	GGGGACCAGGTGCCGTAAGATGCAAGTGCGCACTAAATCGGAACCCTAAAGGGAGCCCCCGATTTAGAGCTTGACGGCGGAAGACTCTCCTCCGGGCGCGGAAGACTCTCCTCCGATTTTTTTTTTTTTTTAGCGATCCTAGGGCGATCA	0.2	6.19	0.91
1866	GGGGACCAGGTGCCGTAAGTTCTCAAGCCGCACTAAATCGGAACCCTAAAGGGAGCCCCCGATTTAGAGCTTGACCGGAAGACTCTCCTCCGGTGGCGCGGAAGACTCTCCTCCGAGCGCCACCTAGCGGAAGCGATCCTAGGGCGATCA	0.37	9.03	1.2
1867	GGGGACCAGGTGCCGTAAGTTCGAGCTTAGCACTAAATCGGAACCCTAAAGGGAGCCCCCGATTTAGAGCTTGACCGGAAGACTCTCCTCCGGTGGCGCGGAAGACTCTCCTCCGATTTTTTTTTTTTTTTAGCGATCCTAGGGCGATCA	0.23	8.46	1.02
1868	GGGGACCAGGTGCCGTAAGTGACGGACGGGCACTAAATCGGAACCCTAAAGGGAGCCCCCGATTTAGAGCTTGACGGAAGACTCTCCTCCGCGTGGCGCGGAAGACTCTCCTCCGAGCGCCACCTAGCGGAAGCGATCCTAGGGCGATCA	0.4	5.64	1.02
1869	GGGGACCAGGTGCCGTAAGCTCTCGCGTTGCACTAAATCGGAACCCTAAAGGGAGCCCCCGATTTAGAGCTTGACGGAAGACTCTCCTCCGCGTGGCGCGGAAGACTCTCCTCCGATTTTTTTTTTTTTTTAGCGATCCTAGGGCGATCA	0.21	5.24	0.89
1870	GGGGACCAGGTGCCGTAAGTGTCCGGTCGGCACTAAATCGGAACCCTAAAGGGAGCCCCCGATTTAGAGCTCGGAAGACTCTCCTCCGGAACGTGGCGCGGAAGACTCTCCTCCGAGCGCCACCTAGCGGAAGCGATCCTAGGGCGATCA	0.26	12.14	0.95
1871	GGGGACCAGGTGCCGTAAGAACCTCCTCAGCACTAAATCGGAACCCTAAAGGGAGCCCCCGATTTAGAGCTCGGAAGACTCTCCTCCGGAACGTGGCGCGGAAGACTCTCCTCCGATTTTTTTTTTTTTTTAGCGATCCTAGGGCGATCA	0.26	11.09	0.95
1872	GGGGACCAGGTGCCGTAAGCATGTAACAAGCACTAAATCGGAACCCTAAAGGGAGCCCCCGATTTAGAGCCGGAAGACTCTCCTCCGCGAACGTGGCGCGGAAGACTCTCCTCCGAGCGCCACCTAGCGGAAGCGATCCTAGGGCGATCA	0.3	9.05	1.12
1873	GGGGACCAGGTGCCGTAAGGCCCGACCTGGCACTAAATCGGAACCCTAAAGGGAGCCCCCGATTTAGAGCCGGAAGACTCTCCTCCGCGAACGTGGCGCGGAAGACTCTCCTCCGATTTTTTTTTTTTTTTAGCGATCCTAGGGCGATCA	0.17	7.81	0.9
1874	GGGGACCAGGTGCCGTAAGCGAGAGCAGTGCACTAAATCGGAACCCTAAAGGGAGCCCCCGATTTAGACGGAAGACTCTCCTCCGGGCGAACGTGGCGCGGAAGACTCTCCTCCGAGCGCCACCTAGCGGAAGCGATCCTAGGGCGATCA	0.17	7.04	1.22
1875	GGGGACCAGGTGCCGTAAGGAAACCGTACGCACTAAATCGGAACCCTAAAGGGAGCCCCCGATTTAGACGGAAGACTCTCCTCCGGGCGAACGTGGCGCGGAAGACTCTCCTCCGATTTTTTTTTTTTTTTAGCGATCCTAGGGCGATCA	0.15	6.89	0.99
1876	GGGGACCAGGTGCCGTAAGGTGTGCCAAAGCACTAAATCGGAACCCTAAAGGGAGCCCCCGATTTAGCGGAAGACTCTCCTCCGCGGCGAACGTGGCGCGGAAGACTCTCCTCCGAGCGCCACCTAGCGGAAGCGATCCTAGGGCGATCA	0.35	6.34	1.21
1877	GGGGACCAGGTGCCGTAAGAAATGTTGGTGCACTAAATCGGAACCCTAAAGGGAGCCCCCGATTTAGCGGAAGACTCTCCTCCGCGGCGAACGTGGCGCGGAAGACTCTCCTCCGATTTTTTTTTTTTTTTAGCGATCCTAGGGCGATCA	0.18	5.14	0.99
1878	GGGGACCAGGTGCCGTAAGTGTACAATATGCACTAAATCGGAACCCTAAAGGGAGCCCCCGATTTCGGAAGACTCTCCTCCGGCCGGCGAACGTGGCGCGGAAGACTCTCCTCCGAGCGCCACCTAGCGGAAGCGATCCTAGGGCGATCA	0.25	10.6	1.22
1879	GGGGACCAGGTGCCGTAAGCCAACCAAGTGCACTAAATCGGAACCCTAAAGGGAGCCCCCGATTTCGGAAGACTCTCCTCCGGCCGGCGAACGTGGCGCGGAAGACTCTCCTCCGATTTTTTTTTTTTTTTAGCGATCCTAGGGCGATCA	0.12	10.56	1.04
1880	GGGGACCAGGTGCCGTAAGGGATAGCGGCGCACTAAATCGGAACCCTAAAGGGAGCCCCCGATCGGAAGACTCTCCTCCGAAGCCGGCGAACGTGGCGCGGAAGACTCTCCTCCGAGCGCCACCTAGCGGAAGCGATCCTAGGGCGATCA	0.21	10.73	1.25
1881	GGGGACCAGGTGCCGTAAGTCCTAGATTAGCACTAAATCGGAACCCTAAAGGGAGCCCCCGATCGGAAGACTCTCCTCCGAAGCCGGCGAACGTGGCGCGGAAGACTCTCCTCCGATTTTTTTTTTTTTTTAGCGATCCTAGGGCGATCA	0.12	13.17	1
1882	GGGGACCAGGTGCCGTAAGGCGTAGGATTGCACTAAATCGGAACCCTAAAGGGAGCCCCCGACGGAAGACTCTCCTCCGAAAGCCGGCGAACGTGGCGCGGAAGACTCTCCTCCGAGCGCCACCTAGCGGAAGCGATCCTAGGGCGATCA	0.18	8.36	1.29
1883	GGGGACCAGGTGCCGTAAGCCCTGGAGGTGCACTAAATCGGAACCCTAAAGGGAGCCCCCGACGGAAGACTCTCCTCCGAAAGCCGGCGAACGTGGCGCGGAAGACTCTCCTCCGATTTTTTTTTTTTTTTAGCGATCCTAGGGCGATCA	0.17	7.56	0.93
1884	GGGGACCAGGTGCCGTAAGGAATGCTAACGCACTAAATCGGAACCCTAAAGGGAGCCCCCCGGAAGACTCTCCTCCGGGAAAGCCGGCGAACGTGGCGCGGAAGACTCTCCTCCGAGCGCCACCTAGCGGAAGCGATCCTAGGGCGATCA	0.39	10.52	1.27
1885	GGGGACCAGGTGCCGTAAGCCGCATTCGGGCACTAAATCGGAACCCTAAAGGGAGCCCCCCGGAAGACTCTCCTCCGGGAAAGCCGGCGAACGTGGCGCGGAAGACTCTCCTCCGATTTTTTTTTTTTTTTAGCGATCCTAGGGCGATCA	0.22	9.49	0.95
1886	GGGGACCAGGTGCCGTAAGGGCTGTATCGGCACTAAATCGGAACCCTAAAGGGAGCCGGAAGACTCTCCTCCGACGGGGAAAGCCGGCGAACGTGGCGCGGAAGACTCTCCTCCGAGCGCCACCTAGCGGAAGCGATCCTAGGGCGATCA	0.24	12.38	1.36
1887	GGGGACCAGGTGCCGTAAGTTGTCAGTCCGCACTAAATCGGAACCCTAAAGGGAGCCGGAAGACTCTCCTCCGACGGGGAAAGCCGGCGAACGTGGCGCGGAAGACTCTCCTCCGATTTTTTTTTTTTTTTAGCGATCCTAGGGCGATCA	0.21	10.62	1.09
1888	GGGGACCAGGTGCCGTAAGGTTTAACGATGCACTAAATCGGAACCCTAAAGGGCGGAAGACTCTCCTCCGTTGACGGGGAAAGCCGGCGAACGTGGCGCGGAAGACTCTCCTCCGAGCGCCACCTAGCGGAAGCGATCCTAGGGCGATCA	0.3	6.28	1.36
1889	GGGGACCAGGTGCCGTAAGTTCTTGAACGGCACTAAATCGGAACCCTAAAGGGCGGAAGACTCTCCTCCGTTGACGGGGAAAGCCGGCGAACGTGGCGCGGAAGACTCTCCTCCGATTTTTTTTTTTTTTTAGCGATCCTAGGGCGATCA	0.2	5.94	1.09
1890	GGGGACCAGGTGCCGTAAGCCCGATTCGTGCACTAAATCGGAACCCTAACGGAAGACTCTCCTCCGGAGCTTGACGGGGAAAGCCGGCGAACGTGGCGCGGAAGACTCTCCTCCGAGCGCCACCTAGCGGAAGCGATCCTAGGGCGATCA	0.25	7.85	1.31
1891	GGGGACCAGGTGCCGTAAGGAGAATCGTAGCACTAAATCGGAACCCTAACGGAAGACTCTCCTCCGGAGCTTGACGGGGAAAGCCGGCGAACGTGGCGCGGAAGACTCTCCTCCGATTTTTTTTTTTTTTTAGCGATCCTAGGGCGATCA	0.21	7.33	1.02
1892	GGGGACCAGGTGCCGTAAGTCGGTGAGTAGCACTAAATCGGAACCCGGAAGACTCTCCTCCGTTTAGAGCTTGACGGGGAAAGCCGGCGAACGTGGCGCGGAAGACTCTCCTCCGAGCGCCACCTAGCGGAAGCGATCCTAGGGCGATCA	0.3	8.21	1.16
1893	GGGGACCAGGTGCCGTAAGACTGGTCTGCGCACTAAATCGGAACCCGGAAGACTCTCCTCCGTTTAGAGCTTGACGGGGAAAGCCGGCGAACGTGGCGCGGAAGACTCTCCTCCGATTTTTTTTTTTTTTTAGCGATCCTAGGGCGATCA	0.24	6.48	1.05
1894	GGGGACCAGGTGCCGTAAGCACCACGGGTGCACTAAATCGGACGGAAGACTCTCCTCCGCGATTTAGAGCTTGACGGGGAAAGCCGGCGAACGTGGCGCGGAAGACTCTCCTCCGAGCGCCACCTAGCGGAAGCGATCCTAGGGCGATCA	0.27	6.8	1.12
1895	GGGGACCAGGTGCCGTAAGCTTCTAGGCGGCACTAAATCGGACGGAAGACTCTCCTCCGCGATTTAGAGCTTGACGGGGAAAGCCGGCGAACGTGGCGCGGAAGACTCTCCTCCGATTTTTTTTTTTTTTTAGCGATCCTAGGGCGATCA	0.13	6.36	1.03
1896	GGGGACCAGGTGCCGTAAGGCACCAACATGCACTACGGAAGACTCTCCTCCGGAGCCCCCGATTTAGAGCTTGACGGGGAAAGCCGGCGAACGTGGCGCGGAAGACTCTCCTCCGAGCGCCACCTAGCGGAAGCGATCCTAGGGCGATCA	NaN	8.5	1.16
1897	GGGGACCAGGTGCCGTAAGCCCTTTGAAAGCACTACGGAAGACTCTCCTCCGGAGCCCCCGATTTAGAGCTTGACGGGGAAAGCCGGCGAACGTGGCGCGGAAGACTCTCCTCCGATTTTTTTTTTTTTTTAGCGATCCTAGGGCGATCA	0.2	7.43	0.93
1898	GGGGACCAGGTGCCGTAAGTAAAGGCTGAGCACGGAAGACTCTCCTCCGAGGGAGCCCCCGATTTAGAGCTTGACGGGGAAAGCCGGCGAACGTGGCGCGGAAGACTCTCCTCCGAGCGCCACCTAGCGGAAGCGATCCTAGGGCGATCA	0.38	8.59	1.04
1899	GGGGACCAGGTGCCGTAAGCAGGTGGGTCGCACGGAAGACTCTCCTCCGAGGGAGCCCCCGATTTAGAGCTTGACGGGGAAAGCCGGCGAACGTGGCGCGGAAGACTCTCCTCCGATTTTTTTTTTTTTTTAGCGATCCTAGGGCGATCA	0.15	8.18	1
1900	GGGGACCAGGTGCCGTAAGCGGTCGGTGGAAGCCGGACAGGCAGCGACAGCCCTGACAGACAAGACTCTCCTAGCTGCGTCCGGAAGACTCTCCTCCGCGGAAGACTCTCCTCCGTGTGCCTACAGCCGCACGCGATCCTAGGGCGATCA	0.25	4.52	1.3
1901	GGGGACCAGGTGCCGTAAGACTGAGACCTAAGCCGGACAGGCAGCGACAGCCCTGACAGACAAGACTCTCCTAGCTGCGTCCGGAAGACTCTCCTCCGCGGAAGACTCTCCTCCGTTTTTTTTTTTTTTTTCGCGATCCTAGGGCGATCA	0.35	4.33	0.92
1902	GGGGACCAGGTGCCGTAAGCTGAACCACCAAGCCGGACAGGCAGCGACAGCCCTGACAGACAAGACTCTCCTAGCTGCGCGGAAGACTCTCCTCCGCGCGGAAGACTCTCCTCCGTGTGCCTACAGCCGCACGCGATCCTAGGGCGATCA	0.39	2.8	1.37
1903	GGGGACCAGGTGCCGTAAGAGTATGGTCAAAGCCGGACAGGCAGCGACAGCCCTGACAGACAAGACTCTCCTAGCTGCGCGGAAGACTCTCCTCCGCGCGGAAGACTCTCCTCCGTTTTTTTTTTTTTTTTCGCGATCCTAGGGCGATCA	0.32	2.64	1.03
1904	GGGGACCAGGTGCCGTAAGGGCGTCTGTAAAGCCGGACAGGCAGCGACAGCCCTGACAGACAAGACTCTCCTAGCTGCGGAAGACTCTCCTCCGGTCGCGGAAGACTCTCCTCCGTGTGCCTACAGCCGCACGCGATCCTAGGGCGATCA	0.18	4.09	1.42
1905	GGGGACCAGGTGCCGTAAGAACCCATGATAAGCCGGACAGGCAGCGACAGCCCTGACAGACAAGACTCTCCTAGCTGCGGAAGACTCTCCTCCGGTCGCGGAAGACTCTCCTCCGTTTTTTTTTTTTTTTTCGCGATCCTAGGGCGATCA	0.23	4.43	1.1
1906	GGGGACCAGGTGCCGTAAGTGTAAAGGCTAAGCCGGACAGGCAGCGACAGCCCTGACAGACAAGACTCTCCTAGCCGGAAGACTCTCCTCCGCGGTCGCGGAAGACTCTCCTCCGTGTGCCTACAGCCGCACGCGATCCTAGGGCGATCA	0.29	4.84	1.26
1907	GGGGACCAGGTGCCGTAAGTAACATTGTGAAGCCGGACAGGCAGCGACAGCCCTGACAGACAAGACTCTCCTAGCCGGAAGACTCTCCTCCGCGGTCGCGGAAGACTCTCCTCCGTTTTTTTTTTTTTTTTCGCGATCCTAGGGCGATCA	0.25	4.67	1.13
1908	GGGGACCAGGTGCCGTAAGTAGCACATTAAAGCCGGACAGGCAGCGACAGCCCTGACAGACAAGACTCTCCTAGCGGAAGACTCTCCTCCGCCGGTCGCGGAAGACTCTCCTCCGTGTGCCTACAGCCGCACGCGATCCTAGGGCGATCA	0.18	2.77	1.2
1909	GGGGACCAGGTGCCGTAAGAGCACTATGTAAGCCGGACAGGCAGCGACAGCCCTGACAGACAAGACTCTCCTAGCGGAAGACTCTCCTCCGCCGGTCGCGGAAGACTCTCCTCCGTTTTTTTTTTTTTTTTCGCGATCCTAGGGCGATCA	0.21	2.67	1.05
1910	GGGGACCAGGTGCCGTAAGTTGTAGGCGCAAGCCGGACAGGCAGCGACAGCCCTGACAGACAAGACTCTCCCGGAAGACTCTCCTCCGTCACCGGTCGCGGAAGACTCTCCTCCGTGTGCCTACAGCCGCACGCGATCCTAGGGCGATCA	0.19	3.88	1.22
1911	GGGGACCAGGTGCCGTAAGCAGGTTGGGAAAGCCGGACAGGCAGCGACAGCCCTGACAGACAAGACTCTCCCGGAAGACTCTCCTCCGTCACCGGTCGCGGAAGACTCTCCTCCGTTTTTTTTTTTTTTTTCGCGATCCTAGGGCGATCA	0.26	4.54	1.01
1912	GGGGACCAGGTGCCGTAAGCCAGGATAGAAAGCCGGACAGGCAGCGACAGCCCTGACAGACAAGACTCTCCGGAAGACTCTCCTCCGTTCACCGGTCGCGGAAGACTCTCCTCCGTGTGCCTACAGCCGCACGCGATCCTAGGGCGATCA	0.2	4.68	1.27
1913	GGGGACCAGGTGCCGTAAGCGAGTCAGCGAAGCCGGACAGGCAGCGACAGCCCTGACAGACAAGACTCTCCGGAAGACTCTCCTCCGTTCACCGGTCGCGGAAGACTCTCCTCCGTTTTTTTTTTTTTTTTCGCGATCCTAGGGCGATCA	0.32	4.4	1.07
1914	GGGGACCAGGTGCCGTAAGGCTAAGTATGAAGCCGGACAGGCAGCGACAGCCCTGACAGACAAGACTCCGGAAGACTCTCCTCCGTCTTCACCGGTCGCGGAAGACTCTCCTCCGTGTGCCTACAGCCGCACGCGATCCTAGGGCGATCA	0.22	4.75	1.28
1915	GGGGACCAGGTGCCGTAAGGGTAGCCTTCAAGCCGGACAGGCAGCGACAGCCCTGACAGACAAGACTCCGGAAGACTCTCCTCCGTCTTCACCGGTCGCGGAAGACTCTCCTCCGTTTTTTTTTTTTTTTTCGCGATCCTAGGGCGATCA	0.21	4	1.05
1916	GGGGACCAGGTGCCGTAAGTAAAATCGTTAAGCCGGACAGGCAGCGACAGCCCTGACAGACAAGACTCGGAAGACTCTCCTCCGGTCTTCACCGGTCGCGGAAGACTCTCCTCCGTGTGCCTACAGCCGCACGCGATCCTAGGGCGATCA	0.27	8.2	1.35
1917	GGGGACCAGGTGCCGTAAGAGAGTAGTCAAAGCCGGACAGGCAGCGACAGCCCTGACAGACAAGACTCGGAAGACTCTCCTCCGGTCTTCACCGGTCGCGGAAGACTCTCCTCCGTTTTTTTTTTTTTTTTCGCGATCCTAGGGCGATCA	0.34	8.68	1.01
1918	GGGGACCAGGTGCCGTAAGGCAAGGACCGAAGCCGGACAGGCAGCGACAGCCCTGACAGACAAGACGGAAGACTCTCCTCCGTCGTCTTCACCGGTCGCGGAAGACTCTCCTCCGTGTGCCTACAGCCGCACGCGATCCTAGGGCGATCA	0.31	2.79	1.28
1919	GGGGACCAGGTGCCGTAAGTTGCGCGACCAAGCCGGACAGGCAGCGACAGCCCTGACAGACAAGACGGAAGACTCTCCTCCGTCGTCTTCACCGGTCGCGGAAGACTCTCCTCCGTTTTTTTTTTTTTTTTCGCGATCCTAGGGCGATCA	0.28	2.36	1.01
1920	GGGGACCAGGTGCCGTAAGATATCGAATGAAGCCGGACAGGCAGCGACAGCCCTGACAGACAACGGAAGACTCTCCTCCGCCTCGTCTTCACCGGTCGCGGAAGACTCTCCTCCGTGTGCCTACAGCCGCACGCGATCCTAGGGCGATCA	0.3	3.16	1.36
1921	GGGGACCAGGTGCCGTAAGTAGACCTGCCAAGCCGGACAGGCAGCGACAGCCCTGACAGACAACGGAAGACTCTCCTCCGCCTCGTCTTCACCGGTCGCGGAAGACTCTCCTCCGTTTTTTTTTTTTTTTTCGCGATCCTAGGGCGATCA	0.19	2.81	1.08
1922	GGGGACCAGGTGCCGTAAGGAACCTCTGTAAGCCGGACAGGCAGCGACAGCCCTGACAGACACGGAAGACTCTCCTCCGTCCTCGTCTTCACCGGTCGCGGAAGACTCTCCTCCGTGTGCCTACAGCCGCACGCGATCCTAGGGCGATCA	0.21	3.5	1.21
1923	GGGGACCAGGTGCCGTAAGTATGCTGCGCAAGCCGGACAGGCAGCGACAGCCCTGACAGACACGGAAGACTCTCCTCCGTCCTCGTCTTCACCGGTCGCGGAAGACTCTCCTCCGTTTTTTTTTTTTTTTTCGCGATCCTAGGGCGATCA	0.16	2.93	1.04
1924	GGGGACCAGGTGCCGTAAGAGGGAGCGCTAAGCCGGACAGGCAGCGACAGCCCTGACAGACGGAAGACTCTCCTCCGCGTCCTCGTCTTCACCGGTCGCGGAAGACTCTCCTCCGTGTGCCTACAGCCGCACGCGATCCTAGGGCGATCA	0.22	3.11	1.31
1925	GGGGACCAGGTGCCGTAAGATACAATAGAAAGCCGGACAGGCAGCGACAGCCCTGACAGACGGAAGACTCTCCTCCGCGTCCTCGTCTTCACCGGTCGCGGAAGACTCTCCTCCGTTTTTTTTTTTTTTTTCGCGATCCTAGGGCGATCA	0.19	2.91	1.06
1926	GGGGACCAGGTGCCGTAAGACAGAAATCAAAGCCGGACAGGCAGCGACAGCCCTGACGGAAGACTCTCCTCCGGCTGCGTCCTCGTCTTCACCGGTCGCGGAAGACTCTCCTCCGTGTGCCTACAGCCGCACGCGATCCTAGGGCGATCA	0.29	3.64	1.46
1927	GGGGACCAGGTGCCGTAAGCCTTCTAAAGAAGCCGGACAGGCAGCGACAGCCCTGACGGAAGACTCTCCTCCGGCTGCGTCCTCGTCTTCACCGGTCGCGGAAGACTCTCCTCCGTTTTTTTTTTTTTTTTCGCGATCCTAGGGCGATCA	0.19	3.88	1.11
1928	GGGGACCAGGTGCCGTAAGGAATTTAGGCAAGCCGGACAGGCAGCGACAGCCCCGGAAGACTCTCCTCCGCTAGCTGCGTCCTCGTCTTCACCGGTCGCGGAAGACTCTCCTCCGTGTGCCTACAGCCGCACGCGATCCTAGGGCGATCA	0.21	4.23	1.25
1929	GGGGACCAGGTGCCGTAAGCACCATGTTAAAGCCGGACAGGCAGCGACAGCCCCGGAAGACTCTCCTCCGCTAGCTGCGTCCTCGTCTTCACCGGTCGCGGAAGACTCTCCTCCGTTTTTTTTTTTTTTTTCGCGATCCTAGGGCGATCA	0.3	4.35	1.12
1930	GGGGACCAGGTGCCGTAAGCCTTAGCCACAAGCCGGACAGGCAGCGACACGGAAGACTCTCCTCCGTCTCCTAGCTGCGTCCTCGTCTTCACCGGTCGCGGAAGACTCTCCTCCGTGTGCCTACAGCCGCACGCGATCCTAGGGCGATCA	0.27	2.81	1.39
1931	GGGGACCAGGTGCCGTAAGTCCAAAATATAAGCCGGACAGGCAGCGACACGGAAGACTCTCCTCCGTCTCCTAGCTGCGTCCTCGTCTTCACCGGTCGCGGAAGACTCTCCTCCGTTTTTTTTTTTTTTTTCGCGATCCTAGGGCGATCA	0.21	2.67	0.96
1932	GGGGACCAGGTGCCGTAAGAACGCTACTCAAGCCGGACAGGCAGCCGGAAGACTCTCCTCCGAGACTCTCCTAGCTGCGTCCTCGTCTTCACCGGTCGCGGAAGACTCTCCTCCGTGTGCCTACAGCCGCACGCGATCCTAGGGCGATCA	0.19	9.34	1.35
1933	GGGGACCAGGTGCCGTAAGATAGGCTGCTAAGCCGGACAGGCAGCCGGAAGACTCTCCTCCGAGACTCTCCTAGCTGCGTCCTCGTCTTCACCGGTCGCGGAAGACTCTCCTCCGTTTTTTTTTTTTTTTTCGCGATCCTAGGGCGATCA	0.24	9.55	1.05
1934	GGGGACCAGGTGCCGTAAGAGGACACAGGAAGCCGGACAGGCCGGAAGACTCTCCTCCGACAAGACTCTCCTAGCTGCGTCCTCGTCTTCACCGGTCGCGGAAGACTCTCCTCCGTGTGCCTACAGCCGCACGCGATCCTAGGGCGATCA	0.14	7.51	1.38
1935	GGGGACCAGGTGCCGTAAGAAGTTCACTCAAGCCGGACAGGCCGGAAGACTCTCCTCCGACAAGACTCTCCTAGCTGCGTCCTCGTCTTCACCGGTCGCGGAAGACTCTCCTCCGTTTTTTTTTTTTTTTTCGCGATCCTAGGGCGATCA	0.18	8.24	1.01
1936	GGGGACCAGGTGCCGTAAGTGATCAGTTTAAGCCGCGGAAGACTCTCCTCCGCTGACAGACAAGACTCTCCTAGCTGCGTCCTCGTCTTCACCGGTCGCGGAAGACTCTCCTCCGTGTGCCTACAGCCGCACGCGATCCTAGGGCGATCA	0.13	3.01	1.48
1937	GGGGACCAGGTGCCGTAAGTAAAAGATTGAAGCCGCGGAAGACTCTCCTCCGCTGACAGACAAGACTCTCCTAGCTGCGTCCTCGTCTTCACCGGTCGCGGAAGACTCTCCTCCGTTTTTTTTTTTTTTTTCGCGATCCTAGGGCGATCA	0.16	3.33	1.04
1938	GGGGACCAGGTGCCGTAAGGGTTACGCCCAAGCGGAAGACTCTCCTCCGGCCCTGACAGACAAGACTCTCCTAGCTGCGTCCTCGTCTTCACCGGTCGCGGAAGACTCTCCTCCGTGTGCCTACAGCCGCACGCGATCCTAGGGCGATCA	0.19	3.7	1.28
1939	GGGGACCAGGTGCCGTAAGCAAGAATTGCAAGCGGAAGACTCTCCTCCGGCCCTGACAGACAAGACTCTCCTAGCTGCGTCCTCGTCTTCACCGGTCGCGGAAGACTCTCCTCCGTTTTTTTTTTTTTTTTCGCGATCCTAGGGCGATCA	0.18	4.2	0.91
1940	GGGGACCAGGTGCCGTAAGGCAGCATTCTGCACTAAATCGGAACCCTAAAGGGAGCCCCCGATTTAGAGCTTGACGGGGAAAGCCGGCGAACGTGGATGACTCATAATGACTCATAGCGCCACCTAGCGGAAGCGATCCTAGGGCGATCA	2.86	0.07	1.2
1941	GGGGACCAGGTGCCGTAAGGGGACAGTTTGCACTAAATCGGAACCCTAAAGGGAGCCCCCGATTTAGAGCTTGACGGGGAAAGCCGGCGAACGTGGATGACTCATAATGACTCATATTTTTTTTTTTTTTTAGCGATCCTAGGGCGATCA	2.7	0.58	0.71
1942	GGGGACCAGGTGCCGTAAGCTAGCGATTGGCACTAAATCGGAACCCTAAAGGGAGCCCCCGATTTAGAGCTTGACGGGGAAAGCCGGCGAACGTATGACTCATGGAATGACTCATAGCGCCACCTAGCGGAAGCGATCCTAGGGCGATCA	2.33	0.13	1.02
1943	GGGGACCAGGTGCCGTAAGTTACCTCGCGGCACTAAATCGGAACCCTAAAGGGAGCCCCCGATTTAGAGCTTGACGGGGAAAGCCGGCGAACGTATGACTCATGGAATGACTCATATTTTTTTTTTTTTTTAGCGATCCTAGGGCGATCA	2.38	0.2	0.9
1944	GGGGACCAGGTGCCGTAAGCTCTGGACTGGCACTAAATCGGAACCCTAAAGGGAGCCCCCGATTTAGAGCTTGACGGGGAAAGCCGGCGAACATGACTCATAAGGAATGACTCATAGCGCCACCTAGCGGAAGCGATCCTAGGGCGATCA	2.14	0.14	1.03
1945	GGGGACCAGGTGCCGTAAGAGTTTTAGCGGCACTAAATCGGAACCCTAAAGGGAGCCCCCGATTTAGAGCTTGACGGGGAAAGCCGGCGAACATGACTCATAAGGAATGACTCATATTTTTTTTTTTTTTTAGCGATCCTAGGGCGATCA	2.46	0.27	1.11
1946	GGGGACCAGGTGCCGTAAGTGAGCGTGGAGCACTAAATCGGAACCCTAAAGGGAGCCCCCGATTTAGAGCTTGACGGGGAAAGCCGGCGAATGACTCATGAAAGGAATGACTCATAGCGCCACCTAGCGGAAGCGATCCTAGGGCGATCA	2.05	0.07	1.03
1947	GGGGACCAGGTGCCGTAAGTGAGTGCATGGCACTAAATCGGAACCCTAAAGGGAGCCCCCGATTTAGAGCTTGACGGGGAAAGCCGGCGAATGACTCATGAAAGGAATGACTCATATTTTTTTTTTTTTTTAGCGATCCTAGGGCGATCA	2.64	0.33	0.92
1948	GGGGACCAGGTGCCGTAAGATTTGGCCTGGCACTAAATCGGAACCCTAAAGGGAGCCCCCGATTTAGAGCTTGACGGGGAAAGCCGGCGATGACTCATAGAAAGGAATGACTCATAGCGCCACCTAGCGGAAGCGATCCTAGGGCGATCA	3.77	0.08	1.13
1949	GGGGACCAGGTGCCGTAAGCCGAAGCTAAGCACTAAATCGGAACCCTAAAGGGAGCCCCCGATTTAGAGCTTGACGGGGAAAGCCGGCGATGACTCATAGAAAGGAATGACTCATATTTTTTTTTTTTTTTAGCGATCCTAGGGCGATCA	3.54	0.26	0.99
1950	GGGGACCAGGTGCCGTAAGCCGGTCGTGGGCACTAAATCGGAACCCTAAAGGGAGCCCCCGATTTAGAGCTTGACGGGGAAAGCCGGATGACTCATCGAGAAAGGAATGACTCATAGCGCCACCTAGCGGAAGCGATCCTAGGGCGATCA	2.93	0.1	1.04
1951	GGGGACCAGGTGCCGTAAGGGACGTTCTAGCACTAAATCGGAACCCTAAAGGGAGCCCCCGATTTAGAGCTTGACGGGGAAAGCCGGATGACTCATCGAGAAAGGAATGACTCATATTTTTTTTTTTTTTTAGCGATCCTAGGGCGATCA	3.15	0.41	0.88
1952	GGGGACCAGGTGCCGTAAGCATTTAGTGAGCACTAAATCGGAACCCTAAAGGGAGCCCCCGATTTAGAGCTTGACGGGGAAAGCCATGACTCATGGCGAGAAAGGAATGACTCATAGCGCCACCTAGCGGAAGCGATCCTAGGGCGATCA	NaN	0.1	1.17
1953	GGGGACCAGGTGCCGTAAGGACTATTTTCGCACTAAATCGGAACCCTAAAGGGAGCCCCCGATTTAGAGCTTGACGGGGAAAGCCATGACTCATGGCGAGAAAGGAATGACTCATATTTTTTTTTTTTTTTAGCGATCCTAGGGCGATCA	1.92	0.29	0.71
1954	GGGGACCAGGTGCCGTAAGGAGTCAAAGCGCACTAAATCGGAACCCTAAAGGGAGCCCCCGATTTAGAGCTTGACGGGGAAAGCATGACTCATTGGCGAGAAAGGAATGACTCATAGCGCCACCTAGCGGAAGCGATCCTAGGGCGATCA	2.39	0.22	1.12
1955	GGGGACCAGGTGCCGTAAGGATCCATGCCGCACTAAATCGGAACCCTAAAGGGAGCCCCCGATTTAGAGCTTGACGGGGAAAGCATGACTCATTGGCGAGAAAGGAATGACTCATATTTTTTTTTTTTTTTAGCGATCCTAGGGCGATCA	2.26	0.24	0.88
1956	GGGGACCAGGTGCCGTAAGTTGGGCGGCGGCACTAAATCGGAACCCTAAAGGGAGCCCCCGATTTAGAGCTTGACGGGGAAAATGACTCATCGTGGCGAGAAAGGAATGACTCATAGCGCCACCTAGCGGAAGCGATCCTAGGGCGATCA	3.17	0.09	0.79
1957	GGGGACCAGGTGCCGTAAGGTGTCTGAAAGCACTAAATCGGAACCCTAAAGGGAGCCCCCGATTTAGAGCTTGACGGGGAAAATGACTCATCGTGGCGAGAAAGGAATGACTCATATTTTTTTTTTTTTTTAGCGATCCTAGGGCGATCA	2.7	0.26	0.63
1958	GGGGACCAGGTGCCGTAAGAACACGATCGGCACTAAATCGGAACCCTAAAGGGAGCCCCCGATTTAGAGCTTGACGGGGAATGACTCATAACGTGGCGAGAAAGGAATGACTCATAGCGCCACCTAGCGGAAGCGATCCTAGGGCGATCA	2.43	0.15	1.02
1959	GGGGACCAGGTGCCGTAAGTTCTGGTACAGCACTAAATCGGAACCCTAAAGGGAGCCCCCGATTTAGAGCTTGACGGGGAATGACTCATAACGTGGCGAGAAAGGAATGACTCATATTTTTTTTTTTTTTTAGCGATCCTAGGGCGATCA	2.48	0.22	0.95
1960	GGGGACCAGGTGCCGTAAGAGTTGCGCTAGCACTAAATCGGAACCCTAAAGGGAGCCCCCGATTTAGAGCTTGACGGGATGACTCATCGAACGTGGCGAGAAAGGAATGACTCATAGCGCCACCTAGCGGAAGCGATCCTAGGGCGATCA	3.01	0.07	0.97
1961	GGGGACCAGGTGCCGTAAGACCAGCTGTCGCACTAAATCGGAACCCTAAAGGGAGCCCCCGATTTAGAGCTTGACGGGATGACTCATCGAACGTGGCGAGAAAGGAATGACTCATATTTTTTTTTTTTTTTAGCGATCCTAGGGCGATCA	3.29	0.29	0.87
1962	GGGGACCAGGTGCCGTAAGAGAGTTAACGGCACTAAATCGGAACCCTAAAGGGAGCCCCCGATTTAGAGCTTGACATGACTCATCGGCGAACGTGGCGAGAAAGGAATGACTCATAGCGCCACCTAGCGGAAGCGATCCTAGGGCGATCA	NaN	0.36	1.02
1963	GGGGACCAGGTGCCGTAAGCTAAGCCGCCGCACTAAATCGGAACCCTAAAGGGAGCCCCCGATTTAGAGCTTGACATGACTCATCGGCGAACGTGGCGAGAAAGGAATGACTCATATTTTTTTTTTTTTTTAGCGATCCTAGGGCGATCA	2.6	0.11	0.95
1964	GGGGACCAGGTGCCGTAAGTCTAACACTAGCACTAAATCGGAACCCTAAAGGGAGCCCCCGATTTAGAGCTATGACTCATAAGCCGGCGAACGTGGCGAGAAAGGAATGACTCATAGCGCCACCTAGCGGAAGCGATCCTAGGGCGATCA	NaN	0.05	0.9
1965	GGGGACCAGGTGCCGTAAGAAGAGTTCGGGCACTAAATCGGAACCCTAAAGGGAGCCCCCGATTTAGAGCTATGACTCATAAGCCGGCGAACGTGGCGAGAAAGGAATGACTCATATTTTTTTTTTTTTTTAGCGATCCTAGGGCGATCA	3.34	0.36	0.77
1966	GGGGACCAGGTGCCGTAAGACGTGCTTCTGCACTAAATCGGAACCCTAAAGGGAGCCCCCGATTTAGAATGACTCATGGAAAGCCGGCGAACGTGGCGAGAAAGGAATGACTCATAGCGCCACCTAGCGGAAGCGATCCTAGGGCGATCA	1.98	0.13	1.03
1967	GGGGACCAGGTGCCGTAAGATCCTTCGGAGCACTAAATCGGAACCCTAAAGGGAGCCCCCGATTTAGAATGACTCATGGAAAGCCGGCGAACGTGGCGAGAAAGGAATGACTCATATTTTTTTTTTTTTTTAGCGATCCTAGGGCGATCA	2.05	0.29	0.84
1968	GGGGACCAGGTGCCGTAAGCGGGAGAATTGCACTAAATCGGAACCCTAAAGGGAGCCCCCGATTATGACTCATACGGGGAAAGCCGGCGAACGTGGCGAGAAAGGAATGACTCATAGCGCCACCTAGCGGAAGCGATCCTAGGGCGATCA	3.91	0.13	1.05
1969	GGGGACCAGGTGCCGTAAGACCTGTAAATGCACTAAATCGGAACCCTAAAGGGAGCCCCCGATTATGACTCATACGGGGAAAGCCGGCGAACGTGGCGAGAAAGGAATGACTCATATTTTTTTTTTTTTTTAGCGATCCTAGGGCGATCA	3.94	0.36	0.93
1970	GGGGACCAGGTGCCGTAAGCAGAACTGCAGCACTAAATCGGAACCCTAAAGGGAGCCCCCGATGACTCATTTGACGGGGAAAGCCGGCGAACGTGGCGAGAAAGGAATGACTCATAGCGCCACCTAGCGGAAGCGATCCTAGGGCGATCA	2.64	0.15	1.02
1971	GGGGACCAGGTGCCGTAAGTTAGATCGCAGCACTAAATCGGAACCCTAAAGGGAGCCCCCGATGACTCATTTGACGGGGAAAGCCGGCGAACGTGGCGAGAAAGGAATGACTCATATTTTTTTTTTTTTTTAGCGATCCTAGGGCGATCA	2.61	0.52	0.88
1972	GGGGACCAGGTGCCGTAAGCTACATAGTGGCACTAAATCGGAACCCTAAAGGGAGCCATGACTCATGAGCTTGACGGGGAAAGCCGGCGAACGTGGCGAGAAAGGAATGACTCATAGCGCCACCTAGCGGAAGCGATCCTAGGGCGATCA	1.75	0.14	1.38
1973	GGGGACCAGGTGCCGTAAGGTGGCAAGACGCACTAAATCGGAACCCTAAAGGGAGCCATGACTCATGAGCTTGACGGGGAAAGCCGGCGAACGTGGCGAGAAAGGAATGACTCATATTTTTTTTTTTTTTTAGCGATCCTAGGGCGATCA	2.57	0.13	0.89
1974	GGGGACCAGGTGCCGTAAGAGTTAGGCAGGCACTAAATCGGAACCCTAAAATGACTCATCGATTTAGAGCTTGACGGGGAAAGCCGGCGAACGTGGCGAGAAAGGAATGACTCATAGCGCCACCTAGCGGAAGCGATCCTAGGGCGATCA	2.98	0.12	1.16
1975	GGGGACCAGGTGCCGTAAGCTGAACTAGGGCACTAAATCGGAACCCTAAAATGACTCATCGATTTAGAGCTTGACGGGGAAAGCCGGCGAACGTGGCGAGAAAGGAATGACTCATATTTTTTTTTTTTTTTAGCGATCCTAGGGCGATCA	2.89	0.14	0.86
1976	GGGGACCAGGTGCCGTAAGACAAAACGCGGCACTAAATCGGAAATGACTCATGAGCCCCCGATTTAGAGCTTGACGGGGAAAGCCGGCGAACGTGGCGAGAAAGGAATGACTCATAGCGCCACCTAGCGGAAGCGATCCTAGGGCGATCA	1.98	0.1	1.06
1977	GGGGACCAGGTGCCGTAAGTTTCACACCAGCACTAAATCGGAAATGACTCATGAGCCCCCGATTTAGAGCTTGACGGGGAAAGCCGGCGAACGTGGCGAGAAAGGAATGACTCATATTTTTTTTTTTTTTTAGCGATCCTAGGGCGATCA	2.56	0.15	0.94
1978	GGGGACCAGGTGCCGTAAGCGGCTTGTTCGCACTAAATGACTCATCTAAAGGGAGCCCCCGATTTAGAGCTTGACGGGGAAAGCCGGCGAACGTGGCGAGAAAGGAATGACTCATAGCGCCACCTAGCGGAAGCGATCCTAGGGCGATCA	2.13	0.15	1.19
1979	GGGGACCAGGTGCCGTAAGATCTGGGCTCGCACTAAATGACTCATCTAAAGGGAGCCCCCGATTTAGAGCTTGACGGGGAAAGCCGGCGAACGTGGCGAGAAAGGAATGACTCATATTTTTTTTTTTTTTTAGCGATCCTAGGGCGATCA	3.46	0.12	1.09
1980	GGGGACCAGGTGCCGTAAGTGACACCTCCATGACTCATCGGAACCCTAAAGGGAGCCCCCGATTTAGAGCTTGACGGGGAAAGCCGGCGAACGTGGCGAGAAAGGAATGACTCATAGCGCCACCTAGCGGAAGCGATCCTAGGGCGATCA	2.49	0.08	1.03
1981	GGGGACCAGGTGCCGTAAGCGAGACACGCATGACTCATCGGAACCCTAAAGGGAGCCCCCGATTTAGAGCTTGACGGGGAAAGCCGGCGAACGTGGCGAGAAAGGAATGACTCATATTTTTTTTTTTTTTTAGCGATCCTAGGGCGATCA	3.12	0.07	0.94
1982	GGGGACCAGGTGCCGTAAGGTCACATGGGAAGCCGGACAGGCAGCGACAGCCCTGACAGACAAGACTCTCCTAGCTGCGTCCTCGTCTTCACCGGTATGACTCATGATGACTCATTGTGCCTACAGCCGCACGCGATCCTAGGGCGATCA	3.87	0.05	1.24
1983	GGGGACCAGGTGCCGTAAGGTAAGGGTTGAAGCCGGACAGGCAGCGACAGCCCTGACAGACAAGACTCTCCTAGCTGCGTCCTCGTCTTCACCGGTATGACTCATGATGACTCATTTTTTTTTTTTTTTTTCGCGATCCTAGGGCGATCA	3.53	0.2	1
1984	GGGGACCAGGTGCCGTAAGGCAGGTTCAGAAGCCGGACAGGCAGCGACAGCCCTGACAGACAAGACTCTCCTAGCTGCGTCCTCGTCTTCACCGATGACTCATCTGATGACTCATTGTGCCTACAGCCGCACGCGATCCTAGGGCGATCA	5.09	0.06	1.24
1985	GGGGACCAGGTGCCGTAAGGTCATGTTCAAAGCCGGACAGGCAGCGACAGCCCTGACAGACAAGACTCTCCTAGCTGCGTCCTCGTCTTCACCGATGACTCATCTGATGACTCATTTTTTTTTTTTTTTTTCGCGATCCTAGGGCGATCA	4.21	0.19	1.05
1986	GGGGACCAGGTGCCGTAAGTTTGGCACTGAAGCCGGACAGGCAGCGACAGCCCTGACAGACAAGACTCTCCTAGCTGCGTCCTCGTCTTCACATGACTCATTCCTGATGACTCATTGTGCCTACAGCCGCACGCGATCCTAGGGCGATCA	2.77	0.07	1.42
1987	GGGGACCAGGTGCCGTAAGCTGTTAGAGGAAGCCGGACAGGCAGCGACAGCCCTGACAGACAAGACTCTCCTAGCTGCGTCCTCGTCTTCACATGACTCATTCCTGATGACTCATTTTTTTTTTTTTTTTTCGCGATCCTAGGGCGATCA	3.19	0.13	1.02
1988	GGGGACCAGGTGCCGTAAGTAGTGGTGCGAAGCCGGACAGGCAGCGACAGCCCTGACAGACAAGACTCTCCTAGCTGCGTCCTCGTCTTCATGACTCATGTTCCTGATGACTCATTGTGCCTACAGCCGCACGCGATCCTAGGGCGATCA	2.74	0.06	1.27
1989	GGGGACCAGGTGCCGTAAGGGACTGACGAAAGCCGGACAGGCAGCGACAGCCCTGACAGACAAGACTCTCCTAGCTGCGTCCTCGTCTTCATGACTCATGTTCCTGATGACTCATTTTTTTTTTTTTTTTTCGCGATCCTAGGGCGATCA	2.91	0.12	1.07
1990	GGGGACCAGGTGCCGTAAGTATTCACCCGAAGCCGGACAGGCAGCGACAGCCCTGACAGACAAGACTCTCCTAGCTGCGTCCTCGTCTTATGACTCATCGTTCCTGATGACTCATTGTGCCTACAGCCGCACGCGATCCTAGGGCGATCA	5.26	0.07	1.29
1991	GGGGACCAGGTGCCGTAAGGATTCAGGTTAAGCCGGACAGGCAGCGACAGCCCTGACAGACAAGACTCTCCTAGCTGCGTCCTCGTCTTATGACTCATCGTTCCTGATGACTCATTTTTTTTTTTTTTTTTCGCGATCCTAGGGCGATCA	4.59	0.16	1.07
1992	GGGGACCAGGTGCCGTAAGATGCTGCTTTAAGCCGGACAGGCAGCGACAGCCCTGACAGACAAGACTCTCCTAGCTGCGTCCTCGTCATGACTCATCGCGTTCCTGATGACTCATTGTGCCTACAGCCGCACGCGATCCTAGGGCGATCA	3.27	0.06	1.3
1993	GGGGACCAGGTGCCGTAAGAAGTGTAAAAAAGCCGGACAGGCAGCGACAGCCCTGACAGACAAGACTCTCCTAGCTGCGTCCTCGTCATGACTCATCGCGTTCCTGATGACTCATTTTTTTTTTTTTTTTTCGCGATCCTAGGGCGATCA	3.53	0.15	0.95
1994	GGGGACCAGGTGCCGTAAGCGTACACATTAAGCCGGACAGGCAGCGACAGCCCTGACAGACAAGACTCTCCTAGCTGCGTCCTCGATGACTCATGTCGCGTTCCTGATGACTCATTGTGCCTACAGCCGCACGCGATCCTAGGGCGATCA	3.11	0.07	1.23
1995	GGGGACCAGGTGCCGTAAGTAACGGCCCAAAGCCGGACAGGCAGCGACAGCCCTGACAGACAAGACTCTCCTAGCTGCGTCCTCGATGACTCATGTCGCGTTCCTGATGACTCATTTTTTTTTTTTTTTTTCGCGATCCTAGGGCGATCA	3.46	0.08	1.05
1996	GGGGACCAGGTGCCGTAAGTCCAGACGCAAAGCCGGACAGGCAGCGACAGCCCTGACAGACAAGACTCTCCTAGCTGCGTCCTCATGACTCATGGTCGCGTTCCTGATGACTCATTGTGCCTACAGCCGCACGCGATCCTAGGGCGATCA	2.57	0.07	1.29
1997	GGGGACCAGGTGCCGTAAGCATGACATATAAGCCGGACAGGCAGCGACAGCCCTGACAGACAAGACTCTCCTAGCTGCGTCCTCATGACTCATGGTCGCGTTCCTGATGACTCATTTTTTTTTTTTTTTTTCGCGATCCTAGGGCGATCA	2.51	0.13	1.03
1998	GGGGACCAGGTGCCGTAAGAAATAGCAGGAAGCCGGACAGGCAGCGACAGCCCTGACAGACAAGACTCTCCTAGCTGCGTCCATGACTCATCCGGTCGCGTTCCTGATGACTCATTGTGCCTACAGCCGCACGCGATCCTAGGGCGATCA	3.24	0.09	1.22
1999	GGGGACCAGGTGCCGTAAGAGCAGTCCATAAGCCGGACAGGCAGCGACAGCCCTGACAGACAAGACTCTCCTAGCTGCGTCCATGACTCATCCGGTCGCGTTCCTGATGACTCATTTTTTTTTTTTTTTTTCGCGATCCTAGGGCGATCA	3.29	0.09	1.02
[truncated: 4,501 more rows]

## Sheet: constant_flanks_lib_Gcn4
ID	sequence	Gcn4 binding score (conc 1:3)
1	GGGGACCAGGTGCCGTAAGGCCGGACCGTTATTGCTATATTGAAGTAGTGATTAGAAGCCGGACAGGCAGCGACAGCCCTGACAGACAAGACTCTCCTAGCTGCCTCTCTCCATATGACTCATAAATATATGAAAGGCAGATGTGCCTACAGCCGCACTGCTGTGAACAATAAAGATTCTACGCGATCCTAGGGCGATCA	3.41
2	GGGGACCAGGTGCCGTAAGCGTGAGCCACGACGTGAACCATCACCCTAATCAAGTTTTTTGGGGTCGAGGTGCCGTAAAGCACTAAATCGGAACCCTAAAGGGAGCCTCTCCATATGACTCATAAATATAAAGCCGGCGAACGTGGCGAGAAAGGAAGGGAAGAAAGCGCCACCTAGCGGAAGCGATCCTAGGGCGATCA	3.78
3	GGGGACCAGGTGCCGTAAGAAGTTAAGTACACTTAGGTCTGATGGTCATTCATATGACCCCATAGATTCGTATTCTGCTGTATACTAGGCAAAGAAGTTGATACGTTTCTCCATATGACTCATAAATATAGTGGGAAGAGTTTTGACCATATTTTTTGTGCTAAATCCATTGCGTATAAAGTGCGATCCTAGGGCGATCA	4.55
4	GGGGACCAGGTGCCGTAAGAGGTAGAGTTCATTAATAGTACCCTTAGATGTTAGGTCTTATACGTAGGAAAAGTCCGTAGGCTCACATACAGTTTGGAATACTATTTTCTCCATATGACTCATAAATATATACTGGAGAATCTATGGGCAAGTGTACAACCGGATGCGTGTTGCGGTCACACGCGATCCTAGGGCGATCA	4.38
5	GGGGACCAGGTGCCGTAAGCGGGCACTGAACTCAACTCCGCACAGATACAAGGTTACATCAAAGGAACGCTTAAAATGAATGCGACATAAGACGTACCCGTTAGAATTCTCCATATGACTCATAAATATAGGCTGGGAGAAACTCTTCAAGAACCTTTTCCACTAGTAACAGCGCTTGTAACGCGATCCTAGGGCGATCA	4.49
6	GGGGACCAGGTGCCGTAAGAGGTTCTGAGCCTATGAACACACGGCAGATTTGTGAATACACAATTGAACTTGTTCTATAGCATTAAACTCTAAGACGAATAAATAGGTCTCCATATGACTCATAAATATACATTCCTTAAAACGTCGTTTACGATTCTAAAGGGTGGTACAAGGATCAACTAGCGATCCTAGGGCGATCA	4.98
7	GGGGACCAGGTGCCGTAAGAATTTACTTGCTGGTTGTCTCTTGCGATTTAACATATTCGAAGATCCTGGAGTTGCATCAGATTCGAAAAGGATTGGACCATTGGTCCTCTCCATATGACTCATAAATATATAGCTTCGCTTTTTGGTCACAGGGATATTCATAACGGTTTTATGAGCAAGTAGCGATCCTAGGGCGATCA	4.64
8	GGGGACCAGGTGCCGTAAGGCAGCGACGCATCCCTCCAGGTCGATTTGACGACGGTCGAATTTCCTTAAGATCGCATCTCAATAAAATTATTACGACGATTTCTTTGTCTCCATATGACTCATAAATATATGCGCATGACAGTTACACCAACGGTTGGTCTTTAAAACTTCCCATTTAAGAGGCGATCCTAGGGCGATCA	4.76
9	GGGGACCAGGTGCCGTAAGTCCAACCTGAAACACCATCAAAAGCTAGATACTCCCATTCCATGTACCTTCGAAGTATGCACTCTTAGCACAATCGCTGCGATGTTAGTCTCCATATGACTCATAAATATAGTCCTTTAGTTCTTACTGATCAAACGAGAGCTATTGAATAAATGTAGTCTGGGCGATCCTAGGGCGATCA	4.68
10	GGGGACCAGGTGCCGTAAGCGTGATTGTATCAATTACCCCGAACCTGAATCTATACTACGTGGAGAGCCGAATAATTTATAGAGAATAGTTCGATATACACAGCATATCTCCATATGACTCATAAATATAAGCAGAATCCCCATTTATAATCCACTGTAACTCCCAATACCTCTGTGCCAGCGCGATCCTAGGGCGATCA	3.77
11	GGGGACCAGGTGCCGTAAGTCCCGAGGATCCTCCAAGTCAACAAAAAACATTTCATAGCAACGATTCACGTCTATTTTCGTGGTTCAGAGTCCCTTATACTTACGGTTCTCCATATGACTCATAAATATACCAATCACTTCTAACACGTAGCTCGTTCTTAAGACGATCAATGGGGAATATCGCGATCCTAGGGCGATCA	4.81
12	GGGGACCAGGTGCCGTAAGCTCGCTTAACTAAAAACTCACTCTTGGAATTCGTCCAAAGTCTACAATATCTCTTAATGAAAATCGTCTAACGGGGCCTTAGTTCTCTTCTCCATATGACTCATAAATATAGATTTTTAAAAGATGCCAAATATAAGGAATGAGAACAATGGAAGGCCCGATGGCGATCCTAGGGCGATCA	6.17
13	GGGGACCAGGTGCCGTAAGGCGACTACATACGTAAACGGGGGAGTCGCTGGATGTTGATCAGTCAACTGCACGACACACTCGTCAACGCTAGGCGATTTCAAACATTTCTCCATATGACTCATAAATATATCAATTAAAAAAAGAACTTCAAGCGGTGACCACATTAAGACTTTTCTGACTGGCGATCCTAGGGCGATCA	4.55
14	GGGGACCAGGTGCCGTAAGCTTCGTTCGTATACCACTGAAAGGATTTTCGCTTAGCTTATGAAACGTTAAACAATTTTCAAATCCTTAATCGCAACTTAAGTAGCAGTCTCCATATGACTCATAAATATACAATTGATCATTGGGTCGAACTTTTGTAAATTACTCGCCGCGTTACTTCAACGCGATCCTAGGGCGATCA	4.46
15	GGGGACCAGGTGCCGTAAGAAATGCCACGTGAAGCGGGAAATTCTATAGGCAATACGAGTAAAGATTGTTATAGTAATTCGTTCTCCTTCGACAGGTTGCATTACAGTCTCCATATGACTCATAAATATACGTGGATGCTACATAATCATCCAAATGTATCACGAGCGACTAAGTGCCAGTCGCGATCCTAGGGCGATCA	4.51
16	GGGGACCAGGTGCCGTAAGACTCATGAAGATTCAAGATTAAAATATCATATTTTGCAACTGGTTACAACCGGCAAGTTAGGTGAGACCTCTGTATGCGGTTACGTATTCTCCATATGACTCATAAATATATGCCATTGGATTACGGCAGTAACTACGGTTATAGAAAGAGAGTAATGTGATTGCGATCCTAGGGCGATCA	4.49
17	GGGGACCAGGTGCCGTAAGGGACACTGCCATGGATTCTCCCTCGCCGAATAAATAAAGGAACTTTTATGTCTATTTCCTCTTAGACAGTTGAAGGATACTGGATACTTCTCCATATGACTCATAAATATAACCAATTGCTAAGCAATCAAGTGTGTCTCCCAACAAACGATGATCGTGAGGAGCGATCCTAGGGCGATCA	5.6
18	GGGGACCAGGTGCCGTAAGTTAGGACGCCGGGTCAAAATGGTTTAAACAGGAGTAAAATTCATAGTCAGATAGGGCATCCGGTTCGATTGAACATAGCCCTTCACGTTCTCCATATGACTCATAAATATAGGAAATACTTTTACTCGCCAACTAACGTACACAGATACACGGTATTTTCATGGCGATCCTAGGGCGATCA	4.64
19	GGGGACCAGGTGCCGTAAGCCTGACATACAGCCATCACCCATTCTAGCTTCATAAAGACGCTGTAGAGCCCATTCAGTAAAAGCGATGTCAGGAGTCTTCTGTCGTCTCTCCATATGACTCATAAATATATCTTTACGATTCAGATATTGTCTAGGATTAGGAGATGGCATAGTTAAGTCATGCGATCCTAGGGCGATCA	4.55
20	GGGGACCAGGTGCCGTAAGAAGCGAAACCTCTTCACATTGCTGAGGCATCTCACATAATCCCTATGTTTGTTGGAAACCCTCGACGACTGGTATCATTTCGAGGATTTCTCCATATGACTCATAAATATACTTTACAGCCTCGTCAAACAGGGATTGAGTGTTTATTTAGGCGATGGTATGAGCGATCCTAGGGCGATCA	4.71
21	GGGGACCAGGTGCCGTAAGAAATGGTCAAGATTGCTATATTGAAGTAGTGATTAGAAGCCGGACAGGCAGCGACAGCCCTGACAGACAAGACTCTCCTAGCTGCCTCTCTCCATATGACTCATAAATATATGAAAGGCAGATGTGCCTACAGCCGCACTGCTGTGAACAATAAAGATTCTACGCGATCCTAGGGCGATCA	3.78
22	GGGGACCAGGTGCCGTAAGTTAGCCCTAGTACGTGAACCATCACCCTAATCAAGTTTTTTGGGGTCGAGGTGCCGTAAAGCACTAAATCGGAACCCTAAAGGGAGCCTCTCCATATGACTCATAAATATAAAGCCGGCGAACGTGGCGAGAAAGGAAGGGAAGAAAGCGCCACCTAGCGGAAGCGATCCTAGGGCGATCA	5.07
23	GGGGACCAGGTGCCGTAAGGACTTCGTGAGACTTAGGTCTGATGGTCATTCATATGACCCCATAGATTCGTATTCTGCTGTATACTAGGCAAAGAAGTTGATACGTTTCTCCATATGACTCATAAATATAGTGGGAAGAGTTTTGACCATATTTTTTGTGCTAAATCCATTGCGTATAAAGTGCGATCCTAGGGCGATCA	5.04
24	GGGGACCAGGTGCCGTAAGTCAACAGTAAAATTAATAGTACCCTTAGATGTTAGGTCTTATACGTAGGAAAAGTCCGTAGGCTCACATACAGTTTGGAATACTATTTTCTCCATATGACTCATAAATATATACTGGAGAATCTATGGGCAAGTGTACAACCGGATGCGTGTTGCGGTCACACGCGATCCTAGGGCGATCA	4.21
25	GGGGACCAGGTGCCGTAAGCGTCACATTCGCTCAACTCCGCACAGATACAAGGTTACATCAAAGGAACGCTTAAAATGAATGCGACATAAGACGTACCCGTTAGAATTCTCCATATGACTCATAAATATAGGCTGGGAGAAACTCTTCAAGAACCTTTTCCACTAGTAACAGCGCTTGTAACGCGATCCTAGGGCGATCA	5.08
26	GGGGACCAGGTGCCGTAAGTCGCTAGGTCGCTATGAACACACGGCAGATTTGTGAATACACAATTGAACTTGTTCTATAGCATTAAACTCTAAGACGAATAAATAGGTCTCCATATGACTCATAAATATACATTCCTTAAAACGTCGTTTACGATTCTAAAGGGTGGTACAAGGATCAACTAGCGATCCTAGGGCGATCA	4.28
27	GGGGACCAGGTGCCGTAAGTGGCAGTAGTATGGTTGTCTCTTGCGATTTAACATATTCGAAGATCCTGGAGTTGCATCAGATTCGAAAAGGATTGGACCATTGGTCCTCTCCATATGACTCATAAATATATAGCTTCGCTTTTTGGTCACAGGGATATTCATAACGGTTTTATGAGCAAGTAGCGATCCTAGGGCGATCA	4.05
28	GGGGACCAGGTGCCGTAAGGCCCAGTAGATTCCCTCCAGGTCGATTTGACGACGGTCGAATTTCCTTAAGATCGCATCTCAATAAAATTATTACGACGATTTCTTTGTCTCCATATGACTCATAAATATATGCGCATGACAGTTACACCAACGGTTGGTCTTTAAAACTTCCCATTTAAGAGGCGATCCTAGGGCGATCA	4.88
29	GGGGACCAGGTGCCGTAAGACGGTGGCCTTACACCATCAAAAGCTAGATACTCCCATTCCATGTACCTTCGAAGTATGCACTCTTAGCACAATCGCTGCGATGTTAGTCTCCATATGACTCATAAATATAGTCCTTTAGTTCTTACTGATCAAACGAGAGCTATTGAATAAATGTAGTCTGGGCGATCCTAGGGCGATCA	4.44
30	GGGGACCAGGTGCCGTAAGCCTGTCGCTCTCAATTACCCCGAACCTGAATCTATACTACGTGGAGAGCCGAATAATTTATAGAGAATAGTTCGATATACACAGCATATCTCCATATGACTCATAAATATAAGCAGAATCCCCATTTATAATCCACTGTAACTCCCAATACCTCTGTGCCAGCGCGATCCTAGGGCGATCA	3.95
31	GGGGACCAGGTGCCGTAAGGTAGTATCCAACTCCAAGTCAACAAAAAACATTTCATAGCAACGATTCACGTCTATTTTCGTGGTTCAGAGTCCCTTATACTTACGGTTCTCCATATGACTCATAAATATACCAATCACTTCTAACACGTAGCTCGTTCTTAAGACGATCAATGGGGAATATCGCGATCCTAGGGCGATCA	4.63
32	GGGGACCAGGTGCCGTAAGGCACATTCAGTAAAAACTCACTCTTGGAATTCGTCCAAAGTCTACAATATCTCTTAATGAAAATCGTCTAACGGGGCCTTAGTTCTCTTCTCCATATGACTCATAAATATAGATTTTTAAAAGATGCCAAATATAAGGAATGAGAACAATGGAAGGCCCGATGGCGATCCTAGGGCGATCA	5.82
33	GGGGACCAGGTGCCGTAAGTTGCAGTACTGCGTAAACGGGGGAGTCGCTGGATGTTGATCAGTCAACTGCACGACACACTCGTCAACGCTAGGCGATTTCAAACATTTCTCCATATGACTCATAAATATATCAATTAAAAAAAGAACTTCAAGCGGTGACCACATTAAGACTTTTCTGACTGGCGATCCTAGGGCGATCA	4.53
34	GGGGACCAGGTGCCGTAAGAGACGCCTTTTTACCACTGAAAGGATTTTCGCTTAGCTTATGAAACGTTAAACAATTTTCAAATCCTTAATCGCAACTTAAGTAGCAGTCTCCATATGACTCATAAATATACAATTGATCATTGGGTCGAACTTTTGTAAATTACTCGCCGCGTTACTTCAACGCGATCCTAGGGCGATCA	4.7
35	GGGGACCAGGTGCCGTAAGAGGTGACTGGAGAAGCGGGAAATTCTATAGGCAATACGAGTAAAGATTGTTATAGTAATTCGTTCTCCTTCGACAGGTTGCATTACAGTCTCCATATGACTCATAAATATACGTGGATGCTACATAATCATCCAAATGTATCACGAGCGACTAAGTGCCAGTCGCGATCCTAGGGCGATCA	4.13
36	GGGGACCAGGTGCCGTAAGACTCTATTGTATTCAAGATTAAAATATCATATTTTGCAACTGGTTACAACCGGCAAGTTAGGTGAGACCTCTGTATGCGGTTACGTATTCTCCATATGACTCATAAATATATGCCATTGGATTACGGCAGTAACTACGGTTATAGAAAGAGAGTAATGTGATTGCGATCCTAGGGCGATCA	3.97
37	GGGGACCAGGTGCCGTAAGCCTGCGCAACTTGGATTCTCCCTCGCCGAATAAATAAAGGAACTTTTATGTCTATTTCCTCTTAGACAGTTGAAGGATACTGGATACTTCTCCATATGACTCATAAATATAACCAATTGCTAAGCAATCAAGTGTGTCTCCCAACAAACGATGATCGTGAGGAGCGATCCTAGGGCGATCA	5.37
38	GGGGACCAGGTGCCGTAAGCATGGTTGGTCGGTCAAAATGGTTTAAACAGGAGTAAAATTCATAGTCAGATAGGGCATCCGGTTCGATTGAACATAGCCCTTCACGTTCTCCATATGACTCATAAATATAGGAAATACTTTTACTCGCCAACTAACGTACACAGATACACGGTATTTTCATGGCGATCCTAGGGCGATCA	4.83
39	GGGGACCAGGTGCCGTAAGAGTCTGAACATGCCATCACCCATTCTAGCTTCATAAAGACGCTGTAGAGCCCATTCAGTAAAAGCGATGTCAGGAGTCTTCTGTCGTCTCTCCATATGACTCATAAATATATCTTTACGATTCAGATATTGTCTAGGATTAGGAGATGGCATAGTTAAGTCATGCGATCCTAGGGCGATCA	4.6
40	GGGGACCAGGTGCCGTAAGCTCTCTCGCCACTTCACATTGCTGAGGCATCTCACATAATCCCTATGTTTGTTGGAAACCCTCGACGACTGGTATCATTTCGAGGATTTCTCCATATGACTCATAAATATACTTTACAGCCTCGTCAAACAGGGATTGAGTGTTTATTTAGGCGATGGTATGAGCGATCCTAGGGCGATCA	4.88
41	GGGGACCAGGTGCCGTAAGTCGACTTTGGTAAAATATGTTTACAAGCCATGATGTGACACGAGGACTCAGTGGGCTATGTTATATATAAATCTACTCGTGCGACTGGTCTCCATATGACTCATAAATATAGATTAACGCTCTTTACCGGAGGTCGTGTACAGCTTTGATACATTAAAGACATGCGATCCTAGGGCGATCA	4.4
42	GGGGACCAGGTGCCGTAAGGCGAACTGGATATTGCTATATTGAAGTAGTGATTAGAAGCCGGACAGGCAGCGACAGCCCTGACAGACAAGACTCTCCTAGCTGCCTCTCTCCATATGACTCATAAATATATGAAAGGCAGATGTGCCTACAGCCGCACTGCTGTGAACAATAAAGATTCTACGCGATCCTAGGGCGATCA	3.53
43	GGGGACCAGGTGCCGTAAGCCTTAGTCAATACGTGAACCATCACCCTAATCAAGTTTTTTGGGGTCGAGGTGCCGTAAAGCACTAAATCGGAACCCTAAAGGGAGCCTCTCCATATGACTCATAAATATAAAGCCGGCGAACGTGGCGAGAAAGGAAGGGAAGAAAGCGCCACCTAGCGGAAGCGATCCTAGGGCGATCA	5.2
44	GGGGACCAGGTGCCGTAAGCTTAAATGACTACTTAGGTCTGATGGTCATTCATATGACCCCATAGATTCGTATTCTGCTGTATACTAGGCAAAGAAGTTGATACGTTTCTCCATATGACTCATAAATATAGTGGGAAGAGTTTTGACCATATTTTTTGTGCTAAATCCATTGCGTATAAAGTGCGATCCTAGGGCGATCA	5.02
45	GGGGACCAGGTGCCGTAAGTCGACCCGAGCATTAATAGTACCCTTAGATGTTAGGTCTTATACGTAGGAAAAGTCCGTAGGCTCACATACAGTTTGGAATACTATTTTCTCCATATGACTCATAAATATATACTGGAGAATCTATGGGCAAGTGTACAACCGGATGCGTGTTGCGGTCACACGCGATCCTAGGGCGATCA	3.86
46	GGGGACCAGGTGCCGTAAGCCAAGTATCGCCTCAACTCCGCACAGATACAAGGTTACATCAAAGGAACGCTTAAAATGAATGCGACATAAGACGTACCCGTTAGAATTCTCCATATGACTCATAAATATAGGCTGGGAGAAACTCTTCAAGAACCTTTTCCACTAGTAACAGCGCTTGTAACGCGATCCTAGGGCGATCA	4.34
47	GGGGACCAGGTGCCGTAAGCGAGACCTATTCTATGAACACACGGCAGATTTGTGAATACACAATTGAACTTGTTCTATAGCATTAAACTCTAAGACGAATAAATAGGTCTCCATATGACTCATAAATATACATTCCTTAAAACGTCGTTTACGATTCTAAAGGGTGGTACAAGGATCAACTAGCGATCCTAGGGCGATCA	4.62
48	GGGGACCAGGTGCCGTAAGAATTAGCTTGTTGGTTGTCTCTTGCGATTTAACATATTCGAAGATCCTGGAGTTGCATCAGATTCGAAAAGGATTGGACCATTGGTCCTCTCCATATGACTCATAAATATATAGCTTCGCTTTTTGGTCACAGGGATATTCATAACGGTTTTATGAGCAAGTAGCGATCCTAGGGCGATCA	4.08
49	GGGGACCAGGTGCCGTAAGAAACCACGTTTTCCCTCCAGGTCGATTTGACGACGGTCGAATTTCCTTAAGATCGCATCTCAATAAAATTATTACGACGATTTCTTTGTCTCCATATGACTCATAAATATATGCGCATGACAGTTACACCAACGGTTGGTCTTTAAAACTTCCCATTTAAGAGGCGATCCTAGGGCGATCA	5.45
50	GGGGACCAGGTGCCGTAAGAGTACTTGTTTACACCATCAAAAGCTAGATACTCCCATTCCATGTACCTTCGAAGTATGCACTCTTAGCACAATCGCTGCGATGTTAGTCTCCATATGACTCATAAATATAGTCCTTTAGTTCTTACTGATCAAACGAGAGCTATTGAATAAATGTAGTCTGGGCGATCCTAGGGCGATCA	5.23
51	GGGGACCAGGTGCCGTAAGTGTTACTCACGCTCCAAGTCAACAAAAAACATTTCATAGCAACGATTCACGTCTATTTTCGTGGTTCAGAGTCCCTTATACTTACGGTTCTCCATATGACTCATAAATATACCAATCACTTCTAACACGTAGCTCGTTCTTAAGACGATCAATGGGGAATATCGCGATCCTAGGGCGATCA	4.29
52	GGGGACCAGGTGCCGTAAGGAAGTCTCGCCAAAAACTCACTCTTGGAATTCGTCCAAAGTCTACAATATCTCTTAATGAAAATCGTCTAACGGGGCCTTAGTTCTCTTCTCCATATGACTCATAAATATAGATTTTTAAAAGATGCCAAATATAAGGAATGAGAACAATGGAAGGCCCGATGGCGATCCTAGGGCGATCA	6.21
53	GGGGACCAGGTGCCGTAAGAAGAAGACCTACGTAAACGGGGGAGTCGCTGGATGTTGATCAGTCAACTGCACGACACACTCGTCAACGCTAGGCGATTTCAAACATTTCTCCATATGACTCATAAATATATCAATTAAAAAAAGAACTTCAAGCGGTGACCACATTAAGACTTTTCTGACTGGCGATCCTAGGGCGATCA	4.69
54	GGGGACCAGGTGCCGTAAGAAAACTTAGTGTACCACTGAAAGGATTTTCGCTTAGCTTATGAAACGTTAAACAATTTTCAAATCCTTAATCGCAACTTAAGTAGCAGTCTCCATATGACTCATAAATATACAATTGATCATTGGGTCGAACTTTTGTAAATTACTCGCCGCGTTACTTCAACGCGATCCTAGGGCGATCA	4.77
55	GGGGACCAGGTGCCGTAAGGCAGGACGCCTGAAGCGGGAAATTCTATAGGCAATACGAGTAAAGATTGTTATAGTAATTCGTTCTCCTTCGACAGGTTGCATTACAGTCTCCATATGACTCATAAATATACGTGGATGCTACATAATCATCCAAATGTATCACGAGCGACTAAGTGCCAGTCGCGATCCTAGGGCGATCA	3.94
56	GGGGACCAGGTGCCGTAAGCTAGGCTCACGTTCAAGATTAAAATATCATATTTTGCAACTGGTTACAACCGGCAAGTTAGGTGAGACCTCTGTATGCGGTTACGTATTCTCCATATGACTCATAAATATATGCCATTGGATTACGGCAGTAACTACGGTTATAGAAAGAGAGTAATGTGATTGCGATCCTAGGGCGATCA	3.99
57	GGGGACCAGGTGCCGTAAGACCTGTACGAGTGGATTCTCCCTCGCCGAATAAATAAAGGAACTTTTATGTCTATTTCCTCTTAGACAGTTGAAGGATACTGGATACTTCTCCATATGACTCATAAATATAACCAATTGCTAAGCAATCAAGTGTGTCTCCCAACAAACGATGATCGTGAGGAGCGATCCTAGGGCGATCA	5.24
58	GGGGACCAGGTGCCGTAAGATGTAGAGCGTGGTCAAAATGGTTTAAACAGGAGTAAAATTCATAGTCAGATAGGGCATCCGGTTCGATTGAACATAGCCCTTCACGTTCTCCATATGACTCATAAATATAGGAAATACTTTTACTCGCCAACTAACGTACACAGATACACGGTATTTTCATGGCGATCCTAGGGCGATCA	4.66
59	GGGGACCAGGTGCCGTAAGATGTCTGCTATGCCATCACCCATTCTAGCTTCATAAAGACGCTGTAGAGCCCATTCAGTAAAAGCGATGTCAGGAGTCTTCTGTCGTCTCTCCATATGACTCATAAATATATCTTTACGATTCAGATATTGTCTAGGATTAGGAGATGGCATAGTTAAGTCATGCGATCCTAGGGCGATCA	4.3
60	GGGGACCAGGTGCCGTAAGATGCTAGTATGCTTCACATTGCTGAGGCATCTCACATAATCCCTATGTTTGTTGGAAACCCTCGACGACTGGTATCATTTCGAGGATTTCTCCATATGACTCATAAATATACTTTACAGCCTCGTCAAACAGGGATTGAGTGTTTATTTAGGCGATGGTATGAGCGATCCTAGGGCGATCA	4.45
61	GGGGACCAGGTGCCGTAAGTCAGTGAGCTTAAAATATGTTTACAAGCCATGATGTGACACGAGGACTCAGTGGGCTATGTTATATATAAATCTACTCGTGCGACTGGTCTCCATATGACTCATAAATATAGATTAACGCTCTTTACCGGAGGTCGTGTACAGCTTTGATACATTAAAGACATGCGATCCTAGGGCGATCA	4.35
62	GGGGACCAGGTGCCGTAAGGCGATCTAATGATTGCTATATTGAAGTAGTGATTAGAAGCCGGACAGGCAGCGACAGCCCTGACAGACAAGACTCTCCTAGCTGCCTCTCTCCATATGACTCATAAATATATGAAAGGCAGATGTGCCTACAGCCGCACTGCTGTGAACAATAAAGATTCTACGCGATCCTAGGGCGATCA	3.66
63	GGGGACCAGGTGCCGTAAGCAAACGGTAATACGTGAACCATCACCCTAATCAAGTTTTTTGGGGTCGAGGTGCCGTAAAGCACTAAATCGGAACCCTAAAGGGAGCCTCTCCATATGACTCATAAATATAAAGCCGGCGAACGTGGCGAGAAAGGAAGGGAAGAAAGCGCCACCTAGCGGAAGCGATCCTAGGGCGATCA	3.86
64	GGGGACCAGGTGCCGTAAGTCGTGAACTACACTTAGGTCTGATGGTCATTCATATGACCCCATAGATTCGTATTCTGCTGTATACTAGGCAAAGAAGTTGATACGTTTCTCCATATGACTCATAAATATAGTGGGAAGAGTTTTGACCATATTTTTTGTGCTAAATCCATTGCGTATAAAGTGCGATCCTAGGGCGATCA	4.88
65	GGGGACCAGGTGCCGTAAGGCCCGTTTAGAATTAATAGTACCCTTAGATGTTAGGTCTTATACGTAGGAAAAGTCCGTAGGCTCACATACAGTTTGGAATACTATTTTCTCCATATGACTCATAAATATATACTGGAGAATCTATGGGCAAGTGTACAACCGGATGCGTGTTGCGGTCACACGCGATCCTAGGGCGATCA	4.01
66	GGGGACCAGGTGCCGTAAGACGGGCACTTGCTATGAACACACGGCAGATTTGTGAATACACAATTGAACTTGTTCTATAGCATTAAACTCTAAGACGAATAAATAGGTCTCCATATGACTCATAAATATACATTCCTTAAAACGTCGTTTACGATTCTAAAGGGTGGTACAAGGATCAACTAGCGATCCTAGGGCGATCA	4.07
67	GGGGACCAGGTGCCGTAAGCCAGGCTAAACTGGTTGTCTCTTGCGATTTAACATATTCGAAGATCCTGGAGTTGCATCAGATTCGAAAAGGATTGGACCATTGGTCCTCTCCATATGACTCATAAATATATAGCTTCGCTTTTTGGTCACAGGGATATTCATAACGGTTTTATGAGCAAGTAGCGATCCTAGGGCGATCA	4.63
68	GGGGACCAGGTGCCGTAAGCGTGAGGGTCATCCCTCCAGGTCGATTTGACGACGGTCGAATTTCCTTAAGATCGCATCTCAATAAAATTATTACGACGATTTCTTTGTCTCCATATGACTCATAAATATATGCGCATGACAGTTACACCAACGGTTGGTCTTTAAAACTTCCCATTTAAGAGGCGATCCTAGGGCGATCA	5.02
69	GGGGACCAGGTGCCGTAAGGAAGCTCGCAAACACCATCAAAAGCTAGATACTCCCATTCCATGTACCTTCGAAGTATGCACTCTTAGCACAATCGCTGCGATGTTAGTCTCCATATGACTCATAAATATAGTCCTTTAGTTCTTACTGATCAAACGAGAGCTATTGAATAAATGTAGTCTGGGCGATCCTAGGGCGATCA	4.87
70	GGGGACCAGGTGCCGTAAGCCAGTGCGGCACAATTACCCCGAACCTGAATCTATACTACGTGGAGAGCCGAATAATTTATAGAGAATAGTTCGATATACACAGCATATCTCCATATGACTCATAAATATAAGCAGAATCCCCATTTATAATCCACTGTAACTCCCAATACCTCTGTGCCAGCGCGATCCTAGGGCGATCA	3.57
71	GGGGACCAGGTGCCGTAAGGGACATTTTAACTCCAAGTCAACAAAAAACATTTCATAGCAACGATTCACGTCTATTTTCGTGGTTCAGAGTCCCTTATACTTACGGTTCTCCATATGACTCATAAATATACCAATCACTTCTAACACGTAGCTCGTTCTTAAGACGATCAATGGGGAATATCGCGATCCTAGGGCGATCA	4.33
72	GGGGACCAGGTGCCGTAAGACACGTATCTTAAAAACTCACTCTTGGAATTCGTCCAAAGTCTACAATATCTCTTAATGAAAATCGTCTAACGGGGCCTTAGTTCTCTTCTCCATATGACTCATAAATATAGATTTTTAAAAGATGCCAAATATAAGGAATGAGAACAATGGAAGGCCCGATGGCGATCCTAGGGCGATCA	6.58
73	GGGGACCAGGTGCCGTAAGCACGTCTCATTCGTAAACGGGGGAGTCGCTGGATGTTGATCAGTCAACTGCACGACACACTCGTCAACGCTAGGCGATTTCAAACATTTCTCCATATGACTCATAAATATATCAATTAAAAAAAGAACTTCAAGCGGTGACCACATTAAGACTTTTCTGACTGGCGATCCTAGGGCGATCA	4.76
74	GGGGACCAGGTGCCGTAAGCCCAGCTTCTTTACCACTGAAAGGATTTTCGCTTAGCTTATGAAACGTTAAACAATTTTCAAATCCTTAATCGCAACTTAAGTAGCAGTCTCCATATGACTCATAAATATACAATTGATCATTGGGTCGAACTTTTGTAAATTACTCGCCGCGTTACTTCAACGCGATCCTAGGGCGATCA	4.76
75	GGGGACCAGGTGCCGTAAGCTAGCAGACGAGAAGCGGGAAATTCTATAGGCAATACGAGTAAAGATTGTTATAGTAATTCGTTCTCCTTCGACAGGTTGCATTACAGTCTCCATATGACTCATAAATATACGTGGATGCTACATAATCATCCAAATGTATCACGAGCGACTAAGTGCCAGTCGCGATCCTAGGGCGATCA	3.91
76	GGGGACCAGGTGCCGTAAGCTGACCTCATATTCAAGATTAAAATATCATATTTTGCAACTGGTTACAACCGGCAAGTTAGGTGAGACCTCTGTATGCGGTTACGTATTCTCCATATGACTCATAAATATATGCCATTGGATTACGGCAGTAACTACGGTTATAGAAAGAGAGTAATGTGATTGCGATCCTAGGGCGATCA	4.12
77	GGGGACCAGGTGCCGTAAGCTGCCACCTATTGGATTCTCCCTCGCCGAATAAATAAAGGAACTTTTATGTCTATTTCCTCTTAGACAGTTGAAGGATACTGGATACTTCTCCATATGACTCATAAATATAACCAATTGCTAAGCAATCAAGTGTGTCTCCCAACAAACGATGATCGTGAGGAGCGATCCTAGGGCGATCA	4.77
78	GGGGACCAGGTGCCGTAAGGTGCCCATAGGGGTCAAAATGGTTTAAACAGGAGTAAAATTCATAGTCAGATAGGGCATCCGGTTCGATTGAACATAGCCCTTCACGTTCTCCATATGACTCATAAATATAGGAAATACTTTTACTCGCCAACTAACGTACACAGATACACGGTATTTTCATGGCGATCCTAGGGCGATCA	4.45
79	GGGGACCAGGTGCCGTAAGGTTCTACAGGAGCCATCACCCATTCTAGCTTCATAAAGACGCTGTAGAGCCCATTCAGTAAAAGCGATGTCAGGAGTCTTCTGTCGTCTCTCCATATGACTCATAAATATATCTTTACGATTCAGATATTGTCTAGGATTAGGAGATGGCATAGTTAAGTCATGCGATCCTAGGGCGATCA	4.13
80	GGGGACCAGGTGCCGTAAGGCTCAAAGCTCCTTCACATTGCTGAGGCATCTCACATAATCCCTATGTTTGTTGGAAACCCTCGACGACTGGTATCATTTCGAGGATTTCTCCATATGACTCATAAATATACTTTACAGCCTCGTCAAACAGGGATTGAGTGTTTATTTAGGCGATGGTATGAGCGATCCTAGGGCGATCA	4.72
81	GGGGACCAGGTGCCGTAAGAAGTCCGCCTTAAAATATGTTTACAAGCCATGATGTGACACGAGGACTCAGTGGGCTATGTTATATATAAATCTACTCGTGCGACTGGTCTCCATATGACTCATAAATATAGATTAACGCTCTTTACCGGAGGTCGTGTACAGCTTTGATACATTAAAGACATGCGATCCTAGGGCGATCA	4.44
82	GGGGACCAGGTGCCGTAAGGCCTAGTGTCAATTGCTATATTGAAGTAGTGATTAGAAGCCGGACAGGCAGCGACAGCCCTGACAGACAAGACTCTCCTAGCTGCCTCTCTCCATATGACTCATAAATATATGAAAGGCAGATGTGCCTACAGCCGCACTGCTGTGAACAATAAAGATTCTACGCGATCCTAGGGCGATCA	3.6
83	GGGGACCAGGTGCCGTAAGACATATGTTGGACGTGAACCATCACCCTAATCAAGTTTTTTGGGGTCGAGGTGCCGTAAAGCACTAAATCGGAACCCTAAAGGGAGCCTCTCCATATGACTCATAAATATAAAGCCGGCGAACGTGGCGAGAAAGGAAGGGAAGAAAGCGCCACCTAGCGGAAGCGATCCTAGGGCGATCA	5.15
84	GGGGACCAGGTGCCGTAAGAACGGGCTTTGACTTAGGTCTGATGGTCATTCATATGACCCCATAGATTCGTATTCTGCTGTATACTAGGCAAAGAAGTTGATACGTTTCTCCATATGACTCATAAATATAGTGGGAAGAGTTTTGACCATATTTTTTGTGCTAAATCCATTGCGTATAAAGTGCGATCCTAGGGCGATCA	5.03
85	GGGGACCAGGTGCCGTAAGGAGCAACGTACATTAATAGTACCCTTAGATGTTAGGTCTTATACGTAGGAAAAGTCCGTAGGCTCACATACAGTTTGGAATACTATTTTCTCCATATGACTCATAAATATATACTGGAGAATCTATGGGCAAGTGTACAACCGGATGCGTGTTGCGGTCACACGCGATCCTAGGGCGATCA	4.43
86	GGGGACCAGGTGCCGTAAGTAGATTTACGTCTCAACTCCGCACAGATACAAGGTTACATCAAAGGAACGCTTAAAATGAATGCGACATAAGACGTACCCGTTAGAATTCTCCATATGACTCATAAATATAGGCTGGGAGAAACTCTTCAAGAACCTTTTCCACTAGTAACAGCGCTTGTAACGCGATCCTAGGGCGATCA	4.47
87	GGGGACCAGGTGCCGTAAGCCATAGCTTGGCTATGAACACACGGCAGATTTGTGAATACACAATTGAACTTGTTCTATAGCATTAAACTCTAAGACGAATAAATAGGTCTCCATATGACTCATAAATATACATTCCTTAAAACGTCGTTTACGATTCTAAAGGGTGGTACAAGGATCAACTAGCGATCCTAGGGCGATCA	4.27
88	GGGGACCAGGTGCCGTAAGAAGCGTCCCAGTGGTTGTCTCTTGCGATTTAACATATTCGAAGATCCTGGAGTTGCATCAGATTCGAAAAGGATTGGACCATTGGTCCTCTCCATATGACTCATAAATATATAGCTTCGCTTTTTGGTCACAGGGATATTCATAACGGTTTTATGAGCAAGTAGCGATCCTAGGGCGATCA	4.63
89	GGGGACCAGGTGCCGTAAGAAGGCTTGCACTCCCTCCAGGTCGATTTGACGACGGTCGAATTTCCTTAAGATCGCATCTCAATAAAATTATTACGACGATTTCTTTGTCTCCATATGACTCATAAATATATGCGCATGACAGTTACACCAACGGTTGGTCTTTAAAACTTCCCATTTAAGAGGCGATCCTAGGGCGATCA	5.04
90	GGGGACCAGGTGCCGTAAGAGATCCTAAAAACACCATCAAAAGCTAGATACTCCCATTCCATGTACCTTCGAAGTATGCACTCTTAGCACAATCGCTGCGATGTTAGTCTCCATATGACTCATAAATATAGTCCTTTAGTTCTTACTGATCAAACGAGAGCTATTGAATAAATGTAGTCTGGGCGATCCTAGGGCGATCA	4.8
91	GGGGACCAGGTGCCGTAAGTAAGCGTGCGACAATTACCCCGAACCTGAATCTATACTACGTGGAGAGCCGAATAATTTATAGAGAATAGTTCGATATACACAGCATATCTCCATATGACTCATAAATATAAGCAGAATCCCCATTTATAATCCACTGTAACTCCCAATACCTCTGTGCCAGCGCGATCCTAGGGCGATCA	3.73
92	GGGGACCAGGTGCCGTAAGAGTAAGTGACACTCCAAGTCAACAAAAAACATTTCATAGCAACGATTCACGTCTATTTTCGTGGTTCAGAGTCCCTTATACTTACGGTTCTCCATATGACTCATAAATATACCAATCACTTCTAACACGTAGCTCGTTCTTAAGACGATCAATGGGGAATATCGCGATCCTAGGGCGATCA	4.46
93	GGGGACCAGGTGCCGTAAGCAACTGTCACCAAAAACTCACTCTTGGAATTCGTCCAAAGTCTACAATATCTCTTAATGAAAATCGTCTAACGGGGCCTTAGTTCTCTTCTCCATATGACTCATAAATATAGATTTTTAAAAGATGCCAAATATAAGGAATGAGAACAATGGAAGGCCCGATGGCGATCCTAGGGCGATCA	5.41
94	GGGGACCAGGTGCCGTAAGTACTCAAATCCCGTAAACGGGGGAGTCGCTGGATGTTGATCAGTCAACTGCACGACACACTCGTCAACGCTAGGCGATTTCAAACATTTCTCCATATGACTCATAAATATATCAATTAAAAAAAGAACTTCAAGCGGTGACCACATTAAGACTTTTCTGACTGGCGATCCTAGGGCGATCA	4.55
95	GGGGACCAGGTGCCGTAAGTCAGCGGCATATACCACTGAAAGGATTTTCGCTTAGCTTATGAAACGTTAAACAATTTTCAAATCCTTAATCGCAACTTAAGTAGCAGTCTCCATATGACTCATAAATATACAATTGATCATTGGGTCGAACTTTTGTAAATTACTCGCCGCGTTACTTCAACGCGATCCTAGGGCGATCA	3.86
96	GGGGACCAGGTGCCGTAAGCAAAAGTCCATGAAGCGGGAAATTCTATAGGCAATACGAGTAAAGATTGTTATAGTAATTCGTTCTCCTTCGACAGGTTGCATTACAGTCTCCATATGACTCATAAATATACGTGGATGCTACATAATCATCCAAATGTATCACGAGCGACTAAGTGCCAGTCGCGATCCTAGGGCGATCA	4.28
97	GGGGACCAGGTGCCGTAAGTGGACACTCAATTCAAGATTAAAATATCATATTTTGCAACTGGTTACAACCGGCAAGTTAGGTGAGACCTCTGTATGCGGTTACGTATTCTCCATATGACTCATAAATATATGCCATTGGATTACGGCAGTAACTACGGTTATAGAAAGAGAGTAATGTGATTGCGATCCTAGGGCGATCA	4.37
98	GGGGACCAGGTGCCGTAAGTTTCTGTGTAATGGATTCTCCCTCGCCGAATAAATAAAGGAACTTTTATGTCTATTTCCTCTTAGACAGTTGAAGGATACTGGATACTTCTCCATATGACTCATAAATATAACCAATTGCTAAGCAATCAAGTGTGTCTCCCAACAAACGATGATCGTGAGGAGCGATCCTAGGGCGATCA	4.99
99	GGGGACCAGGTGCCGTAAGACACAGAGTCGGGTCAAAATGGTTTAAACAGGAGTAAAATTCATAGTCAGATAGGGCATCCGGTTCGATTGAACATAGCCCTTCACGTTCTCCATATGACTCATAAATATAGGAAATACTTTTACTCGCCAACTAACGTACACAGATACACGGTATTTTCATGGCGATCCTAGGGCGATCA	4.67
100	GGGGACCAGGTGCCGTAAGTGCGAATGTATGCCATCACCCATTCTAGCTTCATAAAGACGCTGTAGAGCCCATTCAGTAAAAGCGATGTCAGGAGTCTTCTGTCGTCTCTCCATATGACTCATAAATATATCTTTACGATTCAGATATTGTCTAGGATTAGGAGATGGCATAGTTAAGTCATGCGATCCTAGGGCGATCA	4.09
101	GGGGACCAGGTGCCGTAAGTTCTGAAGAGTCTTCACATTGCTGAGGCATCTCACATAATCCCTATGTTTGTTGGAAACCCTCGACGACTGGTATCATTTCGAGGATTTCTCCATATGACTCATAAATATACTTTACAGCCTCGTCAAACAGGGATTGAGTGTTTATTTAGGCGATGGTATGAGCGATCCTAGGGCGATCA	4.44
102	GGGGACCAGGTGCCGTAAGATCACGACTTTAAAATATGTTTACAAGCCATGATGTGACACGAGGACTCAGTGGGCTATGTTATATATAAATCTACTCGTGCGACTGGTCTCCATATGACTCATAAATATAGATTAACGCTCTTTACCGGAGGTCGTGTACAGCTTTGATACATTAAAGACATGCGATCCTAGGGCGATCA	4.72
103	GGGGACCAGGTGCCGTAAGATCGAGCTTGGATTGCTATATTGAAGTAGTGATTAGAAGCCGGACAGGCAGCGACAGCCCTGACAGACAAGACTCTCCTAGCTGCCTCTCTCCATATGACTCATAAATATATGAAAGGCAGATGTGCCTACAGCCGCACTGCTGTGAACAATAAAGATTCTACGCGATCCTAGGGCGATCA	3.61
104	GGGGACCAGGTGCCGTAAGACAGTCTCCACACGTGAACCATCACCCTAATCAAGTTTTTTGGGGTCGAGGTGCCGTAAAGCACTAAATCGGAACCCTAAAGGGAGCCTCTCCATATGACTCATAAATATAAAGCCGGCGAACGTGGCGAGAAAGGAAGGGAAGAAAGCGCCACCTAGCGGAAGCGATCCTAGGGCGATCA	5.33
105	GGGGACCAGGTGCCGTAAGTAGGCCTTTTGACTTAGGTCTGATGGTCATTCATATGACCCCATAGATTCGTATTCTGCTGTATACTAGGCAAAGAAGTTGATACGTTTCTCCATATGACTCATAAATATAGTGGGAAGAGTTTTGACCATATTTTTTGTGCTAAATCCATTGCGTATAAAGTGCGATCCTAGGGCGATCA	4.82
106	GGGGACCAGGTGCCGTAAGTACGCTCTGGGATTAATAGTACCCTTAGATGTTAGGTCTTATACGTAGGAAAAGTCCGTAGGCTCACATACAGTTTGGAATACTATTTTCTCCATATGACTCATAAATATATACTGGAGAATCTATGGGCAAGTGTACAACCGGATGCGTGTTGCGGTCACACGCGATCCTAGGGCGATCA	3.99
107	GGGGACCAGGTGCCGTAAGGACGTCAGGACCTCAACTCCGCACAGATACAAGGTTACATCAAAGGAACGCTTAAAATGAATGCGACATAAGACGTACCCGTTAGAATTCTCCATATGACTCATAAATATAGGCTGGGAGAAACTCTTCAAGAACCTTTTCCACTAGTAACAGCGCTTGTAACGCGATCCTAGGGCGATCA	4.54
108	GGGGACCAGGTGCCGTAAGGAGATCCCATACTATGAACACACGGCAGATTTGTGAATACACAATTGAACTTGTTCTATAGCATTAAACTCTAAGACGAATAAATAGGTCTCCATATGACTCATAAATATACATTCCTTAAAACGTCGTTTACGATTCTAAAGGGTGGTACAAGGATCAACTAGCGATCCTAGGGCGATCA	4.46
109	GGGGACCAGGTGCCGTAAGTGGATCTGGGATGGTTGTCTCTTGCGATTTAACATATTCGAAGATCCTGGAGTTGCATCAGATTCGAAAAGGATTGGACCATTGGTCCTCTCCATATGACTCATAAATATATAGCTTCGCTTTTTGGTCACAGGGATATTCATAACGGTTTTATGAGCAAGTAGCGATCCTAGGGCGATCA	4.24
110	GGGGACCAGGTGCCGTAAGTCAGGTCGTAGTCCCTCCAGGTCGATTTGACGACGGTCGAATTTCCTTAAGATCGCATCTCAATAAAATTATTACGACGATTTCTTTGTCTCCATATGACTCATAAATATATGCGCATGACAGTTACACCAACGGTTGGTCTTTAAAACTTCCCATTTAAGAGGCGATCCTAGGGCGATCA	4.69
111	GGGGACCAGGTGCCGTAAGGAAAATTGTTGACACCATCAAAAGCTAGATACTCCCATTCCATGTACCTTCGAAGTATGCACTCTTAGCACAATCGCTGCGATGTTAGTCTCCATATGACTCATAAATATAGTCCTTTAGTTCTTACTGATCAAACGAGAGCTATTGAATAAATGTAGTCTGGGCGATCCTAGGGCGATCA	4.75
112	GGGGACCAGGTGCCGTAAGCTATTCACTACCAATTACCCCGAACCTGAATCTATACTACGTGGAGAGCCGAATAATTTATAGAGAATAGTTCGATATACACAGCATATCTCCATATGACTCATAAATATAAGCAGAATCCCCATTTATAATCCACTGTAACTCCCAATACCTCTGTGCCAGCGCGATCCTAGGGCGATCA	3.81
113	GGGGACCAGGTGCCGTAAGTCAGACCGAGTCTCCAAGTCAACAAAAAACATTTCATAGCAACGATTCACGTCTATTTTCGTGGTTCAGAGTCCCTTATACTTACGGTTCTCCATATGACTCATAAATATACCAATCACTTCTAACACGTAGCTCGTTCTTAAGACGATCAATGGGGAATATCGCGATCCTAGGGCGATCA	4.44
114	GGGGACCAGGTGCCGTAAGCTCTCCACACTAAAAACTCACTCTTGGAATTCGTCCAAAGTCTACAATATCTCTTAATGAAAATCGTCTAACGGGGCCTTAGTTCTCTTCTCCATATGACTCATAAATATAGATTTTTAAAAGATGCCAAATATAAGGAATGAGAACAATGGAAGGCCCGATGGCGATCCTAGGGCGATCA	6.15
115	GGGGACCAGGTGCCGTAAGATACCGTGACGCGTAAACGGGGGAGTCGCTGGATGTTGATCAGTCAACTGCACGACACACTCGTCAACGCTAGGCGATTTCAAACATTTCTCCATATGACTCATAAATATATCAATTAAAAAAAGAACTTCAAGCGGTGACCACATTAAGACTTTTCTGACTGGCGATCCTAGGGCGATCA	4.68
116	GGGGACCAGGTGCCGTAAGGCCGCACAGATTACCACTGAAAGGATTTTCGCTTAGCTTATGAAACGTTAAACAATTTTCAAATCCTTAATCGCAACTTAAGTAGCAGTCTCCATATGACTCATAAATATACAATTGATCATTGGGTCGAACTTTTGTAAATTACTCGCCGCGTTACTTCAACGCGATCCTAGGGCGATCA	4.1
117	GGGGACCAGGTGCCGTAAGCTTACAGGCCCGAAGCGGGAAATTCTATAGGCAATACGAGTAAAGATTGTTATAGTAATTCGTTCTCCTTCGACAGGTTGCATTACAGTCTCCATATGACTCATAAATATACGTGGATGCTACATAATCATCCAAATGTATCACGAGCGACTAAGTGCCAGTCGCGATCCTAGGGCGATCA	4.09
118	GGGGACCAGGTGCCGTAAGACTGAGCGAAGTTCAAGATTAAAATATCATATTTTGCAACTGGTTACAACCGGCAAGTTAGGTGAGACCTCTGTATGCGGTTACGTATTCTCCATATGACTCATAAATATATGCCATTGGATTACGGCAGTAACTACGGTTATAGAAAGAGAGTAATGTGATTGCGATCCTAGGGCGATCA	4.35
119	GGGGACCAGGTGCCGTAAGATCTTCATACGTGGATTCTCCCTCGCCGAATAAATAAAGGAACTTTTATGTCTATTTCCTCTTAGACAGTTGAAGGATACTGGATACTTCTCCATATGACTCATAAATATAACCAATTGCTAAGCAATCAAGTGTGTCTCCCAACAAACGATGATCGTGAGGAGCGATCCTAGGGCGATCA	5.39
120	GGGGACCAGGTGCCGTAAGACACTGCTTTGGGTCAAAATGGTTTAAACAGGAGTAAAATTCATAGTCAGATAGGGCATCCGGTTCGATTGAACATAGCCCTTCACGTTCTCCATATGACTCATAAATATAGGAAATACTTTTACTCGCCAACTAACGTACACAGATACACGGTATTTTCATGGCGATCCTAGGGCGATCA	4.89
121	GGGGACCAGGTGCCGTAAGTCAAACCGCATGCCATCACCCATTCTAGCTTCATAAAGACGCTGTAGAGCCCATTCAGTAAAAGCGATGTCAGGAGTCTTCTGTCGTCTCTCCATATGACTCATAAATATATCTTTACGATTCAGATATTGTCTAGGATTAGGAGATGGCATAGTTAAGTCATGCGATCCTAGGGCGATCA	4.33
122	GGGGACCAGGTGCCGTAAGCAGGCTAGTTCCTTCACATTGCTGAGGCATCTCACATAATCCCTATGTTTGTTGGAAACCCTCGACGACTGGTATCATTTCGAGGATTTCTCCATATGACTCATAAATATACTTTACAGCCTCGTCAAACAGGGATTGAGTGTTTATTTAGGCGATGGTATGAGCGATCCTAGGGCGATCA	5.07
123	GGGGACCAGGTGCCGTAAGAGTCCATGAGAAAAATATGTTTACAAGCCATGATGTGACACGAGGACTCAGTGGGCTATGTTATATATAAATCTACTCGTGCGACTGGTCTCCATATGACTCATAAATATAGATTAACGCTCTTTACCGGAGGTCGTGTACAGCTTTGATACATTAAAGACATGCGATCCTAGGGCGATCA	4.45
124	GGGGACCAGGTGCCGTAAGGGCAATTTAGTATTGCTATATTGAAGTAGTGATTAGAAGCCGGACAGGCAGCGACAGCCCTGACAGACAAGACTCTCCTAGCTGCCTCTCTCCATATGACTCATAAATATATGAAAGGCAGATGTGCCTACAGCCGCACTGCTGTGAACAATAAAGATTCTACGCGATCCTAGGGCGATCA	3.33
125	GGGGACCAGGTGCCGTAAGAAGACCGTGGAACGTGAACCATCACCCTAATCAAGTTTTTTGGGGTCGAGGTGCCGTAAAGCACTAAATCGGAACCCTAAAGGGAGCCTCTCCATATGACTCATAAATATAAAGCCGGCGAACGTGGCGAGAAAGGAAGGGAAGAAAGCGCCACCTAGCGGAAGCGATCCTAGGGCGATCA	5.02
126	GGGGACCAGGTGCCGTAAGTCACGACGTATACTTAGGTCTGATGGTCATTCATATGACCCCATAGATTCGTATTCTGCTGTATACTAGGCAAAGAAGTTGATACGTTTCTCCATATGACTCATAAATATAGTGGGAAGAGTTTTGACCATATTTTTTGTGCTAAATCCATTGCGTATAAAGTGCGATCCTAGGGCGATCA	4.51
127	GGGGACCAGGTGCCGTAAGCACCTACCCTGATTAATAGTACCCTTAGATGTTAGGTCTTATACGTAGGAAAAGTCCGTAGGCTCACATACAGTTTGGAATACTATTTTCTCCATATGACTCATAAATATATACTGGAGAATCTATGGGCAAGTGTACAACCGGATGCGTGTTGCGGTCACACGCGATCCTAGGGCGATCA	3.83
128	GGGGACCAGGTGCCGTAAGCGAATATTTGACTCAACTCCGCACAGATACAAGGTTACATCAAAGGAACGCTTAAAATGAATGCGACATAAGACGTACCCGTTAGAATTCTCCATATGACTCATAAATATAGGCTGGGAGAAACTCTTCAAGAACCTTTTCCACTAGTAACAGCGCTTGTAACGCGATCCTAGGGCGATCA	4.97
129	GGGGACCAGGTGCCGTAAGTGGCTAAGCACCTATGAACACACGGCAGATTTGTGAATACACAATTGAACTTGTTCTATAGCATTAAACTCTAAGACGAATAAATAGGTCTCCATATGACTCATAAATATACATTCCTTAAAACGTCGTTTACGATTCTAAAGGGTGGTACAAGGATCAACTAGCGATCCTAGGGCGATCA	4.56
130	GGGGACCAGGTGCCGTAAGAACGTTTCAGCTGGTTGTCTCTTGCGATTTAACATATTCGAAGATCCTGGAGTTGCATCAGATTCGAAAAGGATTGGACCATTGGTCCTCTCCATATGACTCATAAATATATAGCTTCGCTTTTTGGTCACAGGGATATTCATAACGGTTTTATGAGCAAGTAGCGATCCTAGGGCGATCA	4.78
131	GGGGACCAGGTGCCGTAAGAGTATTGCGACTCCCTCCAGGTCGATTTGACGACGGTCGAATTTCCTTAAGATCGCATCTCAATAAAATTATTACGACGATTTCTTTGTCTCCATATGACTCATAAATATATGCGCATGACAGTTACACCAACGGTTGGTCTTTAAAACTTCCCATTTAAGAGGCGATCCTAGGGCGATCA	4.98
132	GGGGACCAGGTGCCGTAAGTACTAAGACCCACACCATCAAAAGCTAGATACTCCCATTCCATGTACCTTCGAAGTATGCACTCTTAGCACAATCGCTGCGATGTTAGTCTCCATATGACTCATAAATATAGTCCTTTAGTTCTTACTGATCAAACGAGAGCTATTGAATAAATGTAGTCTGGGCGATCCTAGGGCGATCA	4.48
133	GGGGACCAGGTGCCGTAAGAGATAGCGTCCCTCCAAGTCAACAAAAAACATTTCATAGCAACGATTCACGTCTATTTTCGTGGTTCAGAGTCCCTTATACTTACGGTTCTCCATATGACTCATAAATATACCAATCACTTCTAACACGTAGCTCGTTCTTAAGACGATCAATGGGGAATATCGCGATCCTAGGGCGATCA	4.36
134	GGGGACCAGGTGCCGTAAGTAACGTAACGCAAAAACTCACTCTTGGAATTCGTCCAAAGTCTACAATATCTCTTAATGAAAATCGTCTAACGGGGCCTTAGTTCTCTTCTCCATATGACTCATAAATATAGATTTTTAAAAGATGCCAAATATAAGGAATGAGAACAATGGAAGGCCCGATGGCGATCCTAGGGCGATCA	5.98
135	GGGGACCAGGTGCCGTAAGAAGAAGTTACGCGTAAACGGGGGAGTCGCTGGATGTTGATCAGTCAACTGCACGACACACTCGTCAACGCTAGGCGATTTCAAACATTTCTCCATATGACTCATAAATATATCAATTAAAAAAAGAACTTCAAGCGGTGACCACATTAAGACTTTTCTGACTGGCGATCCTAGGGCGATCA	4.79
136	GGGGACCAGGTGCCGTAAGGCCTAAGTGTATACCACTGAAAGGATTTTCGCTTAGCTTATGAAACGTTAAACAATTTTCAAATCCTTAATCGCAACTTAAGTAGCAGTCTCCATATGACTCATAAATATACAATTGATCATTGGGTCGAACTTTTGTAAATTACTCGCCGCGTTACTTCAACGCGATCCTAGGGCGATCA	4.59
137	GGGGACCAGGTGCCGTAAGACACTTAGGCCGAAGCGGGAAATTCTATAGGCAATACGAGTAAAGATTGTTATAGTAATTCGTTCTCCTTCGACAGGTTGCATTACAGTCTCCATATGACTCATAAATATACGTGGATGCTACATAATCATCCAAATGTATCACGAGCGACTAAGTGCCAGTCGCGATCCTAGGGCGATCA	4.36
138	GGGGACCAGGTGCCGTAAGTAACACACGTTTTCAAGATTAAAATATCATATTTTGCAACTGGTTACAACCGGCAAGTTAGGTGAGACCTCTGTATGCGGTTACGTATTCTCCATATGACTCATAAATATATGCCATTGGATTACGGCAGTAACTACGGTTATAGAAAGAGAGTAATGTGATTGCGATCCTAGGGCGATCA	4.44
139	GGGGACCAGGTGCCGTAAGGTCGAGCCCATTGGATTCTCCCTCGCCGAATAAATAAAGGAACTTTTATGTCTATTTCCTCTTAGACAGTTGAAGGATACTGGATACTTCTCCATATGACTCATAAATATAACCAATTGCTAAGCAATCAAGTGTGTCTCCCAACAAACGATGATCGTGAGGAGCGATCCTAGGGCGATCA	5.29
140	GGGGACCAGGTGCCGTAAGTTACACAGCTGGGTCAAAATGGTTTAAACAGGAGTAAAATTCATAGTCAGATAGGGCATCCGGTTCGATTGAACATAGCCCTTCACGTTCTCCATATGACTCATAAATATAGGAAATACTTTTACTCGCCAACTAACGTACACAGATACACGGTATTTTCATGGCGATCCTAGGGCGATCA	4.57
141	GGGGACCAGGTGCCGTAAGAAATGTATGCCGCCATCACCCATTCTAGCTTCATAAAGACGCTGTAGAGCCCATTCAGTAAAAGCGATGTCAGGAGTCTTCTGTCGTCTCTCCATATGACTCATAAATATATCTTTACGATTCAGATATTGTCTAGGATTAGGAGATGGCATAGTTAAGTCATGCGATCCTAGGGCGATCA	4.66
142	GGGGACCAGGTGCCGTAAGAATTGACTTCGCTTCACATTGCTGAGGCATCTCACATAATCCCTATGTTTGTTGGAAACCCTCGACGACTGGTATCATTTCGAGGATTTCTCCATATGACTCATAAATATACTTTACAGCCTCGTCAAACAGGGATTGAGTGTTTATTTAGGCGATGGTATGAGCGATCCTAGGGCGATCA	4.62
143	GGGGACCAGGTGCCGTAAGCCATTCGGGCAAAAATATGTTTACAAGCCATGATGTGACACGAGGACTCAGTGGGCTATGTTATATATAAATCTACTCGTGCGACTGGTCTCCATATGACTCATAAATATAGATTAACGCTCTTTACCGGAGGTCGTGTACAGCTTTGATACATTAAAGACATGCGATCCTAGGGCGATCA	4.05
144	GGGGACCAGGTGCCGTAAGTCAGGACACGTATTGCTATATTGAAGTAGTGATTAGAAGCCGGACAGGCAGCGACAGCCCTGACAGACAAGACTCTCCTAGCTGCCTCTCTCCATATGACTCATAAATATATGAAAGGCAGATGTGCCTACAGCCGCACTGCTGTGAACAATAAAGATTCTACGCGATCCTAGGGCGATCA	3.23
145	GGGGACCAGGTGCCGTAAGTTTGTGCTGCAACTTAGGTCTGATGGTCATTCATATGACCCCATAGATTCGTATTCTGCTGTATACTAGGCAAAGAAGTTGATACGTTTCTCCATATGACTCATAAATATAGTGGGAAGAGTTTTGACCATATTTTTTGTGCTAAATCCATTGCGTATAAAGTGCGATCCTAGGGCGATCA	4.41
146	GGGGACCAGGTGCCGTAAGGTGGACTTTACATTAATAGTACCCTTAGATGTTAGGTCTTATACGTAGGAAAAGTCCGTAGGCTCACATACAGTTTGGAATACTATTTTCTCCATATGACTCATAAATATATACTGGAGAATCTATGGGCAAGTGTACAACCGGATGCGTGTTGCGGTCACACGCGATCCTAGGGCGATCA	4.18
147	GGGGACCAGGTGCCGTAAGCCCAAGAGTGACTCAACTCCGCACAGATACAAGGTTACATCAAAGGAACGCTTAAAATGAATGCGACATAAGACGTACCCGTTAGAATTCTCCATATGACTCATAAATATAGGCTGGGAGAAACTCTTCAAGAACCTTTTCCACTAGTAACAGCGCTTGTAACGCGATCCTAGGGCGATCA	5.21
148	GGGGACCAGGTGCCGTAAGACCTGAAAACGCTATGAACACACGGCAGATTTGTGAATACACAATTGAACTTGTTCTATAGCATTAAACTCTAAGACGAATAAATAGGTCTCCATATGACTCATAAATATACATTCCTTAAAACGTCGTTTACGATTCTAAAGGGTGGTACAAGGATCAACTAGCGATCCTAGGGCGATCA	4.37
149	GGGGACCAGGTGCCGTAAGACCTGAGTACTTGGTTGTCTCTTGCGATTTAACATATTCGAAGATCCTGGAGTTGCATCAGATTCGAAAAGGATTGGACCATTGGTCCTCTCCATATGACTCATAAATATATAGCTTCGCTTTTTGGTCACAGGGATATTCATAACGGTTTTATGAGCAAGTAGCGATCCTAGGGCGATCA	4.45
150	GGGGACCAGGTGCCGTAAGATTGCGGCAAGTCCCTCCAGGTCGATTTGACGACGGTCGAATTTCCTTAAGATCGCATCTCAATAAAATTATTACGACGATTTCTTTGTCTCCATATGACTCATAAATATATGCGCATGACAGTTACACCAACGGTTGGTCTTTAAAACTTCCCATTTAAGAGGCGATCCTAGGGCGATCA	5.15
151	GGGGACCAGGTGCCGTAAGTAAGAGCGTTCACACCATCAAAAGCTAGATACTCCCATTCCATGTACCTTCGAAGTATGCACTCTTAGCACAATCGCTGCGATGTTAGTCTCCATATGACTCATAAATATAGTCCTTTAGTTCTTACTGATCAAACGAGAGCTATTGAATAAATGTAGTCTGGGCGATCCTAGGGCGATCA	4.79
152	GGGGACCAGGTGCCGTAAGAACTAAGGCTTCTCCAAGTCAACAAAAAACATTTCATAGCAACGATTCACGTCTATTTTCGTGGTTCAGAGTCCCTTATACTTACGGTTCTCCATATGACTCATAAATATACCAATCACTTCTAACACGTAGCTCGTTCTTAAGACGATCAATGGGGAATATCGCGATCCTAGGGCGATCA	4.93
153	GGGGACCAGGTGCCGTAAGTCCAGGCTAAGAAAAACTCACTCTTGGAATTCGTCCAAAGTCTACAATATCTCTTAATGAAAATCGTCTAACGGGGCCTTAGTTCTCTTCTCCATATGACTCATAAATATAGATTTTTAAAAGATGCCAAATATAAGGAATGAGAACAATGGAAGGCCCGATGGCGATCCTAGGGCGATCA	6.21
154	GGGGACCAGGTGCCGTAAGGGACCGTATTGCGTAAACGGGGGAGTCGCTGGATGTTGATCAGTCAACTGCACGACACACTCGTCAACGCTAGGCGATTTCAAACATTTCTCCATATGACTCATAAATATATCAATTAAAAAAAGAACTTCAAGCGGTGACCACATTAAGACTTTTCTGACTGGCGATCCTAGGGCGATCA	4.64
155	GGGGACCAGGTGCCGTAAGACGTCTCCAGGTACCACTGAAAGGATTTTCGCTTAGCTTATGAAACGTTAAACAATTTTCAAATCCTTAATCGCAACTTAAGTAGCAGTCTCCATATGACTCATAAATATACAATTGATCATTGGGTCGAACTTTTGTAAATTACTCGCCGCGTTACTTCAACGCGATCCTAGGGCGATCA	3.89
156	GGGGACCAGGTGCCGTAAGAAATATCGTTCGAAGCGGGAAATTCTATAGGCAATACGAGTAAAGATTGTTATAGTAATTCGTTCTCCTTCGACAGGTTGCATTACAGTCTCCATATGACTCATAAATATACGTGGATGCTACATAATCATCCAAATGTATCACGAGCGACTAAGTGCCAGTCGCGATCCTAGGGCGATCA	4.24
157	GGGGACCAGGTGCCGTAAGGGTAGTATCGTTTCAAGATTAAAATATCATATTTTGCAACTGGTTACAACCGGCAAGTTAGGTGAGACCTCTGTATGCGGTTACGTATTCTCCATATGACTCATAAATATATGCCATTGGATTACGGCAGTAACTACGGTTATAGAAAGAGAGTAATGTGATTGCGATCCTAGGGCGATCA	4.57
158	GGGGACCAGGTGCCGTAAGGTCGTGGCTAGTGGATTCTCCCTCGCCGAATAAATAAAGGAACTTTTATGTCTATTTCCTCTTAGACAGTTGAAGGATACTGGATACTTCTCCATATGACTCATAAATATAACCAATTGCTAAGCAATCAAGTGTGTCTCCCAACAAACGATGATCGTGAGGAGCGATCCTAGGGCGATCA	4.68
159	GGGGACCAGGTGCCGTAAGAGTAAATGCGTGGTCAAAATGGTTTAAACAGGAGTAAAATTCATAGTCAGATAGGGCATCCGGTTCGATTGAACATAGCCCTTCACGTTCTCCATATGACTCATAAATATAGGAAATACTTTTACTCGCCAACTAACGTACACAGATACACGGTATTTTCATGGCGATCCTAGGGCGATCA	4.54
160	GGGGACCAGGTGCCGTAAGTAAATATGTGGGCCATCACCCATTCTAGCTTCATAAAGACGCTGTAGAGCCCATTCAGTAAAAGCGATGTCAGGAGTCTTCTGTCGTCTCTCCATATGACTCATAAATATATCTTTACGATTCAGATATTGTCTAGGATTAGGAGATGGCATAGTTAAGTCATGCGATCCTAGGGCGATCA	5.07
161	GGGGACCAGGTGCCGTAAGCGATTGCGTACCTTCACATTGCTGAGGCATCTCACATAATCCCTATGTTTGTTGGAAACCCTCGACGACTGGTATCATTTCGAGGATTTCTCCATATGACTCATAAATATACTTTACAGCCTCGTCAAACAGGGATTGAGTGTTTATTTAGGCGATGGTATGAGCGATCCTAGGGCGATCA	4.35
162	GGGGACCAGGTGCCGTAAGTACGCCCGGTTAAAATATGTTTACAAGCCATGATGTGACACGAGGACTCAGTGGGCTATGTTATATATAAATCTACTCGTGCGACTGGTCTCCATATGACTCATAAATATAGATTAACGCTCTTTACCGGAGGTCGTGTACAGCTTTGATACATTAAAGACATGCGATCCTAGGGCGATCA	4.07
163	GGGGACCAGGTGCCGTAAGGAAGATCACATATTGCTATATTGAAGTAGTGATTAGAAGCCGGACAGGCAGCGACAGCCCTGACAGACAAGACTCTCCTAGCTGCCTCTCTCCATATGACTCATAAATATATGAAAGGCAGATGTGCCTACAGCCGCACTGCTGTGAACAATAAAGATTCTACGCGATCCTAGGGCGATCA	3.47
164	GGGGACCAGGTGCCGTAAGATTGCGGTGACACGTGAACCATCACCCTAATCAAGTTTTTTGGGGTCGAGGTGCCGTAAAGCACTAAATCGGAACCCTAAAGGGAGCCTCTCCATATGACTCATAAATATAAAGCCGGCGAACGTGGCGAGAAAGGAAGGGAAGAAAGCGCCACCTAGCGGAAGCGATCCTAGGGCGATCA	4.05
165	GGGGACCAGGTGCCGTAAGGTCGCTCGTAGACTTAGGTCTGATGGTCATTCATATGACCCCATAGATTCGTATTCTGCTGTATACTAGGCAAAGAAGTTGATACGTTTCTCCATATGACTCATAAATATAGTGGGAAGAGTTTTGACCATATTTTTTGTGCTAAATCCATTGCGTATAAAGTGCGATCCTAGGGCGATCA	5
166	GGGGACCAGGTGCCGTAAGTTGGAGAACTTATTAATAGTACCCTTAGATGTTAGGTCTTATACGTAGGAAAAGTCCGTAGGCTCACATACAGTTTGGAATACTATTTTCTCCATATGACTCATAAATATATACTGGAGAATCTATGGGCAAGTGTACAACCGGATGCGTGTTGCGGTCACACGCGATCCTAGGGCGATCA	4
167	GGGGACCAGGTGCCGTAAGGCTCTGCATGACTCAACTCCGCACAGATACAAGGTTACATCAAAGGAACGCTTAAAATGAATGCGACATAAGACGTACCCGTTAGAATTCTCCATATGACTCATAAATATAGGCTGGGAGAAACTCTTCAAGAACCTTTTCCACTAGTAACAGCGCTTGTAACGCGATCCTAGGGCGATCA	4.66
168	GGGGACCAGGTGCCGTAAGAACTCGTGGCACTATGAACACACGGCAGATTTGTGAATACACAATTGAACTTGTTCTATAGCATTAAACTCTAAGACGAATAAATAGGTCTCCATATGACTCATAAATATACATTCCTTAAAACGTCGTTTACGATTCTAAAGGGTGGTACAAGGATCAACTAGCGATCCTAGGGCGATCA	4.67
169	GGGGACCAGGTGCCGTAAGATCTGGGTAAATGGTTGTCTCTTGCGATTTAACATATTCGAAGATCCTGGAGTTGCATCAGATTCGAAAAGGATTGGACCATTGGTCCTCTCCATATGACTCATAAATATATAGCTTCGCTTTTTGGTCACAGGGATATTCATAACGGTTTTATGAGCAAGTAGCGATCCTAGGGCGATCA	4.6
170	GGGGACCAGGTGCCGTAAGATAGAATCCCGTCCCTCCAGGTCGATTTGACGACGGTCGAATTTCCTTAAGATCGCATCTCAATAAAATTATTACGACGATTTCTTTGTCTCCATATGACTCATAAATATATGCGCATGACAGTTACACCAACGGTTGGTCTTTAAAACTTCCCATTTAAGAGGCGATCCTAGGGCGATCA	5.31
171	GGGGACCAGGTGCCGTAAGGCTTAACCTGCACACCATCAAAAGCTAGATACTCCCATTCCATGTACCTTCGAAGTATGCACTCTTAGCACAATCGCTGCGATGTTAGTCTCCATATGACTCATAAATATAGTCCTTTAGTTCTTACTGATCAAACGAGAGCTATTGAATAAATGTAGTCTGGGCGATCCTAGGGCGATCA	4.68
172	GGGGACCAGGTGCCGTAAGAATGGGTCGTACAATTACCCCGAACCTGAATCTATACTACGTGGAGAGCCGAATAATTTATAGAGAATAGTTCGATATACACAGCATATCTCCATATGACTCATAAATATAAGCAGAATCCCCATTTATAATCCACTGTAACTCCCAATACCTCTGTGCCAGCGCGATCCTAGGGCGATCA	3.4
173	GGGGACCAGGTGCCGTAAGAGTAGGTCGTCCTCCAAGTCAACAAAAAACATTTCATAGCAACGATTCACGTCTATTTTCGTGGTTCAGAGTCCCTTATACTTACGGTTCTCCATATGACTCATAAATATACCAATCACTTCTAACACGTAGCTCGTTCTTAAGACGATCAATGGGGAATATCGCGATCCTAGGGCGATCA	4.66
174	GGGGACCAGGTGCCGTAAGAATAGAGGTCGAAAAACTCACTCTTGGAATTCGTCCAAAGTCTACAATATCTCTTAATGAAAATCGTCTAACGGGGCCTTAGTTCTCTTCTCCATATGACTCATAAATATAGATTTTTAAAAGATGCCAAATATAAGGAATGAGAACAATGGAAGGCCCGATGGCGATCCTAGGGCGATCA	5.78
175	GGGGACCAGGTGCCGTAAGGCATGCAATCGCGTAAACGGGGGAGTCGCTGGATGTTGATCAGTCAACTGCACGACACACTCGTCAACGCTAGGCGATTTCAAACATTTCTCCATATGACTCATAAATATATCAATTAAAAAAAGAACTTCAAGCGGTGACCACATTAAGACTTTTCTGACTGGCGATCCTAGGGCGATCA	4.44
176	GGGGACCAGGTGCCGTAAGTGGTTGCAACCTACCACTGAAAGGATTTTCGCTTAGCTTATGAAACGTTAAACAATTTTCAAATCCTTAATCGCAACTTAAGTAGCAGTCTCCATATGACTCATAAATATACAATTGATCATTGGGTCGAACTTTTGTAAATTACTCGCCGCGTTACTTCAACGCGATCCTAGGGCGATCA	3.99
177	GGGGACCAGGTGCCGTAAGATGTTAAGCCGGAAGCGGGAAATTCTATAGGCAATACGAGTAAAGATTGTTATAGTAATTCGTTCTCCTTCGACAGGTTGCATTACAGTCTCCATATGACTCATAAATATACGTGGATGCTACATAATCATCCAAATGTATCACGAGCGACTAAGTGCCAGTCGCGATCCTAGGGCGATCA	4.48
178	GGGGACCAGGTGCCGTAAGGTATGGAGGCCTTCAAGATTAAAATATCATATTTTGCAACTGGTTACAACCGGCAAGTTAGGTGAGACCTCTGTATGCGGTTACGTATTCTCCATATGACTCATAAATATATGCCATTGGATTACGGCAGTAACTACGGTTATAGAAAGAGAGTAATGTGATTGCGATCCTAGGGCGATCA	4.35
179	GGGGACCAGGTGCCGTAAGTGTAGGCGCGATGGATTCTCCCTCGCCGAATAAATAAAGGAACTTTTATGTCTATTTCCTCTTAGACAGTTGAAGGATACTGGATACTTCTCCATATGACTCATAAATATAACCAATTGCTAAGCAATCAAGTGTGTCTCCCAACAAACGATGATCGTGAGGAGCGATCCTAGGGCGATCA	5.3
180	GGGGACCAGGTGCCGTAAGTCGACAGAGGTGGTCAAAATGGTTTAAACAGGAGTAAAATTCATAGTCAGATAGGGCATCCGGTTCGATTGAACATAGCCCTTCACGTTCTCCATATGACTCATAAATATAGGAAATACTTTTACTCGCCAACTAACGTACACAGATACACGGTATTTTCATGGCGATCCTAGGGCGATCA	4.36
181	GGGGACCAGGTGCCGTAAGTCAAATCTTGCGCCATCACCCATTCTAGCTTCATAAAGACGCTGTAGAGCCCATTCAGTAAAAGCGATGTCAGGAGTCTTCTGTCGTCTCTCCATATGACTCATAAATATATCTTTACGATTCAGATATTGTCTAGGATTAGGAGATGGCATAGTTAAGTCATGCGATCCTAGGGCGATCA	4.37
182	GGGGACCAGGTGCCGTAAGAAGTGCTACCACTTCACATTGCTGAGGCATCTCACATAATCCCTATGTTTGTTGGAAACCCTCGACGACTGGTATCATTTCGAGGATTTCTCCATATGACTCATAAATATACTTTACAGCCTCGTCAAACAGGGATTGAGTGTTTATTTAGGCGATGGTATGAGCGATCCTAGGGCGATCA	5.04
183	GGGGACCAGGTGCCGTAAGAGAAAACGCATAAAATATGTTTACAAGCCATGATGTGACACGAGGACTCAGTGGGCTATGTTATATATAAATCTACTCGTGCGACTGGTCTCCATATGACTCATAAATATAGATTAACGCTCTTTACCGGAGGTCGTGTACAGCTTTGATACATTAAAGACATGCGATCCTAGGGCGATCA	4.77
184	GGGGACCAGGTGCCGTAAGTAAGGTTACACATTGCTATATTGAAGTAGTGATTAGAAGCCGGACAGGCAGCGACAGCCCTGACAGACAAGACTCTCCTAGCTGCCTCTCTCCATATGACTCATAAATATATGAAAGGCAGATGTGCCTACAGCCGCACTGCTGTGAACAATAAAGATTCTACGCGATCCTAGGGCGATCA	3.3
185	GGGGACCAGGTGCCGTAAGCCTTGGGCTGTACGTGAACCATCACCCTAATCAAGTTTTTTGGGGTCGAGGTGCCGTAAAGCACTAAATCGGAACCCTAAAGGGAGCCTCTCCATATGACTCATAAATATAAAGCCGGCGAACGTGGCGAGAAAGGAAGGGAAGAAAGCGCCACCTAGCGGAAGCGATCCTAGGGCGATCA	4.7
186	GGGGACCAGGTGCCGTAAGACGTGTAGCCAACTTAGGTCTGATGGTCATTCATATGACCCCATAGATTCGTATTCTGCTGTATACTAGGCAAAGAAGTTGATACGTTTCTCCATATGACTCATAAATATAGTGGGAAGAGTTTTGACCATATTTTTTGTGCTAAATCCATTGCGTATAAAGTGCGATCCTAGGGCGATCA	4.7
187	GGGGACCAGGTGCCGTAAGCGTGTATCCAAATTAATAGTACCCTTAGATGTTAGGTCTTATACGTAGGAAAAGTCCGTAGGCTCACATACAGTTTGGAATACTATTTTCTCCATATGACTCATAAATATATACTGGAGAATCTATGGGCAAGTGTACAACCGGATGCGTGTTGCGGTCACACGCGATCCTAGGGCGATCA	4.38
188	GGGGACCAGGTGCCGTAAGCGACAACAGATCTCAACTCCGCACAGATACAAGGTTACATCAAAGGAACGCTTAAAATGAATGCGACATAAGACGTACCCGTTAGAATTCTCCATATGACTCATAAATATAGGCTGGGAGAAACTCTTCAAGAACCTTTTCCACTAGTAACAGCGCTTGTAACGCGATCCTAGGGCGATCA	4.32
189	GGGGACCAGGTGCCGTAAGTCGCTAACGCACTATGAACACACGGCAGATTTGTGAATACACAATTGAACTTGTTCTATAGCATTAAACTCTAAGACGAATAAATAGGTCTCCATATGACTCATAAATATACATTCCTTAAAACGTCGTTTACGATTCTAAAGGGTGGTACAAGGATCAACTAGCGATCCTAGGGCGATCA	4.11
190	GGGGACCAGGTGCCGTAAGCGACTACGCCCTGGTTGTCTCTTGCGATTTAACATATTCGAAGATCCTGGAGTTGCATCAGATTCGAAAAGGATTGGACCATTGGTCCTCTCCATATGACTCATAAATATATAGCTTCGCTTTTTGGTCACAGGGATATTCATAACGGTTTTATGAGCAAGTAGCGATCCTAGGGCGATCA	4.47
191	GGGGACCAGGTGCCGTAAGACATTGTCGATTCCCTCCAGGTCGATTTGACGACGGTCGAATTTCCTTAAGATCGCATCTCAATAAAATTATTACGACGATTTCTTTGTCTCCATATGACTCATAAATATATGCGCATGACAGTTACACCAACGGTTGGTCTTTAAAACTTCCCATTTAAGAGGCGATCCTAGGGCGATCA	4.39
192	GGGGACCAGGTGCCGTAAGCTGCTAACTACACACCATCAAAAGCTAGATACTCCCATTCCATGTACCTTCGAAGTATGCACTCTTAGCACAATCGCTGCGATGTTAGTCTCCATATGACTCATAAATATAGTCCTTTAGTTCTTACTGATCAAACGAGAGCTATTGAATAAATGTAGTCTGGGCGATCCTAGGGCGATCA	4.73
193	GGGGACCAGGTGCCGTAAGTATGGATCATTCTCCAAGTCAACAAAAAACATTTCATAGCAACGATTCACGTCTATTTTCGTGGTTCAGAGTCCCTTATACTTACGGTTCTCCATATGACTCATAAATATACCAATCACTTCTAACACGTAGCTCGTTCTTAAGACGATCAATGGGGAATATCGCGATCCTAGGGCGATCA	5.15
194	GGGGACCAGGTGCCGTAAGCTCTCGTGGTTAAAAACTCACTCTTGGAATTCGTCCAAAGTCTACAATATCTCTTAATGAAAATCGTCTAACGGGGCCTTAGTTCTCTTCTCCATATGACTCATAAATATAGATTTTTAAAAGATGCCAAATATAAGGAATGAGAACAATGGAAGGCCCGATGGCGATCCTAGGGCGATCA	6.24
195	GGGGACCAGGTGCCGTAAGGGCGCTCATGGCGTAAACGGGGGAGTCGCTGGATGTTGATCAGTCAACTGCACGACACACTCGTCAACGCTAGGCGATTTCAAACATTTCTCCATATGACTCATAAATATATCAATTAAAAAAAGAACTTCAAGCGGTGACCACATTAAGACTTTTCTGACTGGCGATCCTAGGGCGATCA	4.56
196	GGGGACCAGGTGCCGTAAGACAGTGTAGTGTACCACTGAAAGGATTTTCGCTTAGCTTATGAAACGTTAAACAATTTTCAAATCCTTAATCGCAACTTAAGTAGCAGTCTCCATATGACTCATAAATATACAATTGATCATTGGGTCGAACTTTTGTAAATTACTCGCCGCGTTACTTCAACGCGATCCTAGGGCGATCA	4.39
197	GGGGACCAGGTGCCGTAAGACGCAGGGCCTGAAGCGGGAAATTCTATAGGCAATACGAGTAAAGATTGTTATAGTAATTCGTTCTCCTTCGACAGGTTGCATTACAGTCTCCATATGACTCATAAATATACGTGGATGCTACATAATCATCCAAATGTATCACGAGCGACTAAGTGCCAGTCGCGATCCTAGGGCGATCA	4.18
198	GGGGACCAGGTGCCGTAAGGTTTTCATACATTCAAGATTAAAATATCATATTTTGCAACTGGTTACAACCGGCAAGTTAGGTGAGACCTCTGTATGCGGTTACGTATTCTCCATATGACTCATAAATATATGCCATTGGATTACGGCAGTAACTACGGTTATAGAAAGAGAGTAATGTGATTGCGATCCTAGGGCGATCA	4.1
199	GGGGACCAGGTGCCGTAAGAGTGTTGTAACTGGATTCTCCCTCGCCGAATAAATAAAGGAACTTTTATGTCTATTTCCTCTTAGACAGTTGAAGGATACTGGATACTTCTCCATATGACTCATAAATATAACCAATTGCTAAGCAATCAAGTGTGTCTCCCAACAAACGATGATCGTGAGGAGCGATCCTAGGGCGATCA	5.43
200	GGGGACCAGGTGCCGTAAGTTCGTGTGAAGGGTCAAAATGGTTTAAACAGGAGTAAAATTCATAGTCAGATAGGGCATCCGGTTCGATTGAACATAGCCCTTCACGTTCTCCATATGACTCATAAATATAGGAAATACTTTTACTCGCCAACTAACGTACACAGATACACGGTATTTTCATGGCGATCCTAGGGCGATCA	4.2
201	GGGGACCAGGTGCCGTAAGGAAAAGTCCCGGCCATCACCCATTCTAGCTTCATAAAGACGCTGTAGAGCCCATTCAGTAAAAGCGATGTCAGGAGTCTTCTGTCGTCTCTCCATATGACTCATAAATATATCTTTACGATTCAGATATTGTCTAGGATTAGGAGATGGCATAGTTAAGTCATGCGATCCTAGGGCGATCA	4.91
202	GGGGACCAGGTGCCGTAAGCACGCTTCTGCCTTCACATTGCTGAGGCATCTCACATAATCCCTATGTTTGTTGGAAACCCTCGACGACTGGTATCATTTCGAGGATTTCTCCATATGACTCATAAATATACTTTACAGCCTCGTCAAACAGGGATTGAGTGTTTATTTAGGCGATGGTATGAGCGATCCTAGGGCGATCA	4.69
203	GGGGACCAGGTGCCGTAAGAGAACTTGCTGAAAATATGTTTACAAGCCATGATGTGACACGAGGACTCAGTGGGCTATGTTATATATAAATCTACTCGTGCGACTGGTCTCCATATGACTCATAAATATAGATTAACGCTCTTTACCGGAGGTCGTGTACAGCTTTGATACATTAAAGACATGCGATCCTAGGGCGATCA	4.29
204	GGGGACCAGGTGCCGTAAGACTGAATCGTAATTGCTATATTGAAGTAGTGATTAGAAGCCGGACAGGCAGCGACAGCCCTGACAGACAAGACTCTCCTAGCTGCCTCTCTCCATATGACTCATAAATATATGAAAGGCAGATGTGCCTACAGCCGCACTGCTGTGAACAATAAAGATTCTACGCGATCCTAGGGCGATCA	3.45
205	GGGGACCAGGTGCCGTAAGATCTAGGTGATACGTGAACCATCACCCTAATCAAGTTTTTTGGGGTCGAGGTGCCGTAAAGCACTAAATCGGAACCCTAAAGGGAGCCTCTCCATATGACTCATAAATATAAAGCCGGCGAACGTGGCGAGAAAGGAAGGGAAGAAAGCGCCACCTAGCGGAAGCGATCCTAGGGCGATCA	4.21
206	GGGGACCAGGTGCCGTAAGAGGCGATCCTGACTTAGGTCTGATGGTCATTCATATGACCCCATAGATTCGTATTCTGCTGTATACTAGGCAAAGAAGTTGATACGTTTCTCCATATGACTCATAAATATAGTGGGAAGAGTTTTGACCATATTTTTTGTGCTAAATCCATTGCGTATAAAGTGCGATCCTAGGGCGATCA	4.55
207	GGGGACCAGGTGCCGTAAGTGAAGTACTTGATTAATAGTACCCTTAGATGTTAGGTCTTATACGTAGGAAAAGTCCGTAGGCTCACATACAGTTTGGAATACTATTTTCTCCATATGACTCATAAATATATACTGGAGAATCTATGGGCAAGTGTACAACCGGATGCGTGTTGCGGTCACACGCGATCCTAGGGCGATCA	4.12
208	GGGGACCAGGTGCCGTAAGCCTCCTCCATGCTCAACTCCGCACAGATACAAGGTTACATCAAAGGAACGCTTAAAATGAATGCGACATAAGACGTACCCGTTAGAATTCTCCATATGACTCATAAATATAGGCTGGGAGAAACTCTTCAAGAACCTTTTCCACTAGTAACAGCGCTTGTAACGCGATCCTAGGGCGATCA	4.65
209	GGGGACCAGGTGCCGTAAGTGGACCCGAAACTATGAACACACGGCAGATTTGTGAATACACAATTGAACTTGTTCTATAGCATTAAACTCTAAGACGAATAAATAGGTCTCCATATGACTCATAAATATACATTCCTTAAAACGTCGTTTACGATTCTAAAGGGTGGTACAAGGATCAACTAGCGATCCTAGGGCGATCA	4.71
210	GGGGACCAGGTGCCGTAAGGCACAAGCCCTTGGTTGTCTCTTGCGATTTAACATATTCGAAGATCCTGGAGTTGCATCAGATTCGAAAAGGATTGGACCATTGGTCCTCTCCATATGACTCATAAATATATAGCTTCGCTTTTTGGTCACAGGGATATTCATAACGGTTTTATGAGCAAGTAGCGATCCTAGGGCGATCA	4.87
211	GGGGACCAGGTGCCGTAAGTATGCGACAAATCCCTCCAGGTCGATTTGACGACGGTCGAATTTCCTTAAGATCGCATCTCAATAAAATTATTACGACGATTTCTTTGTCTCCATATGACTCATAAATATATGCGCATGACAGTTACACCAACGGTTGGTCTTTAAAACTTCCCATTTAAGAGGCGATCCTAGGGCGATCA	4.98
212	GGGGACCAGGTGCCGTAAGAGGGTCGGACAACACCATCAAAAGCTAGATACTCCCATTCCATGTACCTTCGAAGTATGCACTCTTAGCACAATCGCTGCGATGTTAGTCTCCATATGACTCATAAATATAGTCCTTTAGTTCTTACTGATCAAACGAGAGCTATTGAATAAATGTAGTCTGGGCGATCCTAGGGCGATCA	4.77
213	GGGGACCAGGTGCCGTAAGTGCGGTAACCACAATTACCCCGAACCTGAATCTATACTACGTGGAGAGCCGAATAATTTATAGAGAATAGTTCGATATACACAGCATATCTCCATATGACTCATAAATATAAGCAGAATCCCCATTTATAATCCACTGTAACTCCCAATACCTCTGTGCCAGCGCGATCCTAGGGCGATCA	3.85
214	GGGGACCAGGTGCCGTAAGCCACACAGGGTCTCCAAGTCAACAAAAAACATTTCATAGCAACGATTCACGTCTATTTTCGTGGTTCAGAGTCCCTTATACTTACGGTTCTCCATATGACTCATAAATATACCAATCACTTCTAACACGTAGCTCGTTCTTAAGACGATCAATGGGGAATATCGCGATCCTAGGGCGATCA	4.53
215	GGGGACCAGGTGCCGTAAGAAACTGACAATAAAAACTCACTCTTGGAATTCGTCCAAAGTCTACAATATCTCTTAATGAAAATCGTCTAACGGGGCCTTAGTTCTCTTCTCCATATGACTCATAAATATAGATTTTTAAAAGATGCCAAATATAAGGAATGAGAACAATGGAAGGCCCGATGGCGATCCTAGGGCGATCA	5.85
216	GGGGACCAGGTGCCGTAAGGGCTTACTGGGCGTAAACGGGGGAGTCGCTGGATGTTGATCAGTCAACTGCACGACACACTCGTCAACGCTAGGCGATTTCAAACATTTCTCCATATGACTCATAAATATATCAATTAAAAAAAGAACTTCAAGCGGTGACCACATTAAGACTTTTCTGACTGGCGATCCTAGGGCGATCA	4.87
217	GGGGACCAGGTGCCGTAAGCCCTCATATGCTACCACTGAAAGGATTTTCGCTTAGCTTATGAAACGTTAAACAATTTTCAAATCCTTAATCGCAACTTAAGTAGCAGTCTCCATATGACTCATAAATATACAATTGATCATTGGGTCGAACTTTTGTAAATTACTCGCCGCGTTACTTCAACGCGATCCTAGGGCGATCA	4.29
218	GGGGACCAGGTGCCGTAAGGGTTCACCAGCGAAGCGGGAAATTCTATAGGCAATACGAGTAAAGATTGTTATAGTAATTCGTTCTCCTTCGACAGGTTGCATTACAGTCTCCATATGACTCATAAATATACGTGGATGCTACATAATCATCCAAATGTATCACGAGCGACTAAGTGCCAGTCGCGATCCTAGGGCGATCA	4.09
219	GGGGACCAGGTGCCGTAAGCCACTGAGTGATTCAAGATTAAAATATCATATTTTGCAACTGGTTACAACCGGCAAGTTAGGTGAGACCTCTGTATGCGGTTACGTATTCTCCATATGACTCATAAATATATGCCATTGGATTACGGCAGTAACTACGGTTATAGAAAGAGAGTAATGTGATTGCGATCCTAGGGCGATCA	4.19
220	GGGGACCAGGTGCCGTAAGTTTGGAGGGCCTGGATTCTCCCTCGCCGAATAAATAAAGGAACTTTTATGTCTATTTCCTCTTAGACAGTTGAAGGATACTGGATACTTCTCCATATGACTCATAAATATAACCAATTGCTAAGCAATCAAGTGTGTCTCCCAACAAACGATGATCGTGAGGAGCGATCCTAGGGCGATCA	5.03
221	GGGGACCAGGTGCCGTAAGTAACACACAGGGGTCAAAATGGTTTAAACAGGAGTAAAATTCATAGTCAGATAGGGCATCCGGTTCGATTGAACATAGCCCTTCACGTTCTCCATATGACTCATAAATATAGGAAATACTTTTACTCGCCAACTAACGTACACAGATACACGGTATTTTCATGGCGATCCTAGGGCGATCA	4.3
222	GGGGACCAGGTGCCGTAAGGACAGCTAATCGCCATCACCCATTCTAGCTTCATAAAGACGCTGTAGAGCCCATTCAGTAAAAGCGATGTCAGGAGTCTTCTGTCGTCTCTCCATATGACTCATAAATATATCTTTACGATTCAGATATTGTCTAGGATTAGGAGATGGCATAGTTAAGTCATGCGATCCTAGGGCGATCA	4.41
223	GGGGACCAGGTGCCGTAAGCTCACGGGATCCTTCACATTGCTGAGGCATCTCACATAATCCCTATGTTTGTTGGAAACCCTCGACGACTGGTATCATTTCGAGGATTTCTCCATATGACTCATAAATATACTTTACAGCCTCGTCAAACAGGGATTGAGTGTTTATTTAGGCGATGGTATGAGCGATCCTAGGGCGATCA	4.92
224	GGGGACCAGGTGCCGTAAGGGCCAAACCTGAAAATATGTTTACAAGCCATGATGTGACACGAGGACTCAGTGGGCTATGTTATATATAAATCTACTCGTGCGACTGGTCTCCATATGACTCATAAATATAGATTAACGCTCTTTACCGGAGGTCGTGTACAGCTTTGATACATTAAAGACATGCGATCCTAGGGCGATCA	4.22
225	GGGGACCAGGTGCCGTAAGCGAACATTCATGACCCTCTGGCATTTAACTCGGTTAAGGTAATAGTCCTGAAGCTTCACCGCGAGGAATTCAGAGTAAAGAAAATTAATCTCCATATGACTCATAAATATAAATTCTACTCGTCGACTGCTTAGAATTGAGGATACAGTAACCAAACTTCGTAGCGATCCTAGGGCGATCA	5.35
226	GGGGACCAGGTGCCGTAAGCAACTGCAAGAGCTTAACAGACTAGTTTTGAAAGGTTAGAATATTTTATTTGGAACAGCGTAATCGACCTCACTCAGTAATTTTCACCTCTCCATATGACTCATAAATATAACAGTCTGACACCGCAACGGCATTGCGCGTAATTTAATCCAGGGCCTAGTACGCGATCCTAGGGCGATCA	4.42
227	GGGGACCAGGTGCCGTAAGCAAGTCACCTACCTCATACTCATTCTCGCAACGGACACGAGCTAGTAATGATTCGTCCGAGTACCTTTAGAGATGGATTGCATCTCATTCTCCATATGACTCATAAATATATTCGAGTTCGTAAGCTCTTAGATTCTGTAACTATCTTCGATTGGACCTATGTGCGATCCTAGGGCGATCA	3.63
228	GGGGACCAGGTGCCGTAAGCCATAGTGAACTAATCGATATGTGCTTTTAAAAACATTGGACAGCATGACCATTTTGTCAAAAGGAATTTGGCTGTAGGTGAGGTATATCTCCATATGACTCATAAATATACTGTCGCGACTACAAGTGTGTCTATATGCTAATTTTTGCGTATTCTTCGCTGGCGATCCTAGGGCGATCA	4.56
229	GGGGACCAGGTGCCGTAAGTCCACTCGAACCCTTTCAATTCATGCGATGCCATAGGTTATGTGGTGATTGGGGAATTACTTCGTCCCTTATATCCCTGGAACTTGTTTCTCCATATGACTCATAAATATAGCTCATGAACCCGCTTTATGTTGATAGCCTTACAAATATTTATAGCAGTTACGCGATCCTAGGGCGATCA	4.8
230	GGGGACCAGGTGCCGTAAGGTAGCAATAGCGCATTTATACAACCAAGGTAGGTGCCGCTATTGCATAATCGGCTGGTAGTTGATCTATGATTCGCTACATATCAAATTCTCCATATGACTCATAAATATAGTAAATATGGATCGTGTTCACATCTGACATACAGAAACCGAACCTATAGGTTGCGATCCTAGGGCGATCA	3.78
231	GGGGACCAGGTGCCGTAAGTCTTTAAGAACAAGACCTAGTACGTTGTGGGTATTAATATTACTATAGCTATACAGAGAGCAAGTGCACAATTATTTTAATCCCTCTATCTCCATATGACTCATAAATATAAGCATCGTAGTAGCTGTACGGTTCGAAGGATTGCAGAGACTATGGAAAAGTTGCGATCCTAGGGCGATCA	4.38
232	GGGGACCAGGTGCCGTAAGGCAGCTGCGTGCCTCCAGACACAGGACGTATTTTGGAAATTTTCGAGCGCAATGAATAACTCTAGACTAGATCAGGTAGGACGTTAGTTCTCCATATGACTCATAAATATATTATTACGCGATGTTAGTATAATTCGTATCACGATCCAGCGTCCGGTATGATGCGATCCTAGGGCGATCA	3.61
233	GGGGACCAGGTGCCGTAAGCTGTGAGTGAAGCATGTCCTTTGTTTCCTGGTTTCCAGCACGACGTCCCATCTGGGATGTATTTGGATGAGCCGACAGTCTCAGTGTATCTCCATATGACTCATAAATATATTCTCAATGAGAAAGAACTATTTCCATAGTATAATTGTATGCAATAAACTACGCGATCCTAGGGCGATCA	4.49
234	GGGGACCAGGTGCCGTAAGTGCACGCTCCAACCTCAAGAGGCATGTCTGTATTCGCATGGCTAATGTGATCGGCAAGTTTGGTAAAATCTTCTAAAGTTGATTAGTCTCTCCATATGACTCATAAATATACCGAGTCTAGTATACTACTACTTCCCCAAAGCCTTTAGCACTGACGTTTTGGGCGATCCTAGGGCGATCA	4.59
235	GGGGACCAGGTGCCGTAAGATTAGGTGCGCTTACGGTCAACTCGCAAAGAATTTAATGCTCGATGTGGGAATAAGATATCTACATTGGGTAAGTCCCGTTTCATTCCTCTCCATATGACTCATAAATATAATTTCGATTGTCCCACTATCCATAAACCGGTCTTTCAAACAGTAGATTCAAAGCGATCCTAGGGCGATCA	5.79
236	GGGGACCAGGTGCCGTAAGTGCTCATAGACGTTATGTCTATATTACGAGTAGCGCAGATCCAGATCAACTTCCATTGGTTTACTTTTACTGAAGTTTTCCAGGGCATTCTCCATATGACTCATAAATATACTGTACAGAACGTCTTGACCATGGCTACTCTTCAGCAGGTAAACTTTAACAAGCGATCCTAGGGCGATCA	4
237	GGGGACCAGGTGCCGTAAGAATTTAGAAGCAGTTTATTCATCCCGCAAGAAAATGGATGATAGCTCTGCAGCTTTTCATTCTATCCATAAGAGCTATGGGATATTTATCTCCATATGACTCATAAATATACTCTACGTCTATATCATTTGAATTCTCGGTTGACTATTAGTGACCATCCTTGGCGATCCTAGGGCGATCA	5
238	GGGGACCAGGTGCCGTAAGCCATTAGCATATTTAAATCTTTCCTTCATGATCATAGTTTGCAGACCGATAGACCCAAGAGAAGCTATGGCAGAATGTGGTAACGAAATCTCCATATGACTCATAAATATACTTTTTTTCTGTCTATCCAGTGACGCAGAAGTTGAGACAAACGATGCGGGAGGCGATCCTAGGGCGATCA	5.34
239	GGGGACCAGGTGCCGTAAGTCCACCAGAGAACGGCCAATGATATTGTTCTAAGGACGGTTAAAACAGCCAGAGTATCTACTGGCGTACACGGTAGGAATATATGACTTCTCCATATGACTCATAAATATAGAATGATACCAACCCGTCGATATGAGAGTGTATGGTAGAGTGTATAACGGTAGCGATCCTAGGGCGATCA	3.23
240	GGGGACCAGGTGCCGTAAGGTGGGTCCTATACTACATGCAGTGTAAGGTCGCACATTTGCGCACGCTAGAATATTTCGACGGCTCTTATTTTCTCCTCATAAAAATGTCTCCATATGACTCATAAATATAAATGATGACTGCATCAGATACGATTGCGACTTAAAACTATAGCATGTAGATCGCGATCCTAGGGCGATCA	4.73
241	GGGGACCAGGTGCCGTAAGACTGTCGCTTGGTAAATGAAAGTGGGTATTAGTTCTAGGGCATGTAAAATTTAATATGAGACGATGATGAGACCAGAATTGAAATTGTTCTCCATATGACTCATAAATATAAACCTCAATCGTGAACAGACGGGCACTATAACAACCCTCTTTTCCTAATCAAGCGATCCTAGGGCGATCA	4.85
242	GGGGACCAGGTGCCGTAAGTTAAATGTGCATAAACGCCCAACGGGAAGCCGGAGACGAATCTTTTCAACATCTCCCAATTATATTGACTTTAACATAGCGTTGTCACTCTCCATATGACTCATAAATATATCGTATCAATAGCATCCAACCGATCGAATCATCTGTACATCATTTACCAAACGCGATCCTAGGGCGATCA	4.29
243	GGGGACCAGGTGCCGTAAGGTACGAGGGTCTACGATTATGGACTATAACAGATAGATAGAGACGCTGTAGTTATGTTAAAGTACCTTAGTAGAAACTGTTGTAGTCTTCTCCATATGACTCATAAATATATTTTCGACGTAGGAATGGCTGAGGCCCGAAAATAACACAACGACTTGAAGGCGCGATCCTAGGGCGATCA	4.19
244	GGGGACCAGGTGCCGTAAGTGTGACTGCGCGACCCTCTGGCATTTAACTCGGTTAAGGTAATAGTCCTGAAGCTTCACCGCGAGGAATTCAGAGTAAAGAAAATTAATCTCCATATGACTCATAAATATAAATTCTACTCGTCGACTGCTTAGAATTGAGGATACAGTAACCAAACTTCGTAGCGATCCTAGGGCGATCA	4.81
245	GGGGACCAGGTGCCGTAAGGCTTTCTCAAGGCTTAACAGACTAGTTTTGAAAGGTTAGAATATTTTATTTGGAACAGCGTAATCGACCTCACTCAGTAATTTTCACCTCTCCATATGACTCATAAATATAACAGTCTGACACCGCAACGGCATTGCGCGTAATTTAATCCAGGGCCTAGTACGCGATCCTAGGGCGATCA	4.95
246	GGGGACCAGGTGCCGTAAGCCCTAAAAGTTCCTCATACTCATTCTCGCAACGGACACGAGCTAGTAATGATTCGTCCGAGTACCTTTAGAGATGGATTGCATCTCATTCTCCATATGACTCATAAATATATTCGAGTTCGTAAGCTCTTAGATTCTGTAACTATCTTCGATTGGACCTATGTGCGATCCTAGGGCGATCA	4.21
247	GGGGACCAGGTGCCGTAAGGAGCGTTCTCCTAATCGATATGTGCTTTTAAAAACATTGGACAGCATGACCATTTTGTCAAAAGGAATTTGGCTGTAGGTGAGGTATATCTCCATATGACTCATAAATATACTGTCGCGACTACAAGTGTGTCTATATGCTAATTTTTGCGTATTCTTCGCTGGCGATCCTAGGGCGATCA	4.8
248	GGGGACCAGGTGCCGTAAGACCGTTTTGGCCCTTTCAATTCATGCGATGCCATAGGTTATGTGGTGATTGGGGAATTACTTCGTCCCTTATATCCCTGGAACTTGTTTCTCCATATGACTCATAAATATAGCTCATGAACCCGCTTTATGTTGATAGCCTTACAAATATTTATAGCAGTTACGCGATCCTAGGGCGATCA	4.82
249	GGGGACCAGGTGCCGTAAGTGTCGGTCGACGCATTTATACAACCAAGGTAGGTGCCGCTATTGCATAATCGGCTGGTAGTTGATCTATGATTCGCTACATATCAAATTCTCCATATGACTCATAAATATAGTAAATATGGATCGTGTTCACATCTGACATACAGAAACCGAACCTATAGGTTGCGATCCTAGGGCGATCA	3.89
250	GGGGACCAGGTGCCGTAAGCTAGAGTAGCAAAGACCTAGTACGTTGTGGGTATTAATATTACTATAGCTATACAGAGAGCAAGTGCACAATTATTTTAATCCCTCTATCTCCATATGACTCATAAATATAAGCATCGTAGTAGCTGTACGGTTCGAAGGATTGCAGAGACTATGGAAAAGTTGCGATCCTAGGGCGATCA	4.05
251	GGGGACCAGGTGCCGTAAGCGAGTTCATAGCCTCCAGACACAGGACGTATTTTGGAAATTTTCGAGCGCAATGAATAACTCTAGACTAGATCAGGTAGGACGTTAGTTCTCCATATGACTCATAAATATATTATTACGCGATGTTAGTATAATTCGTATCACGATCCAGCGTCCGGTATGATGCGATCCTAGGGCGATCA	3.96
252	GGGGACCAGGTGCCGTAAGCACACCTACTGGCATGTCCTTTGTTTCCTGGTTTCCAGCACGACGTCCCATCTGGGATGTATTTGGATGAGCCGACAGTCTCAGTGTATCTCCATATGACTCATAAATATATTCTCAATGAGAAAGAACTATTTCCATAGTATAATTGTATGCAATAAACTACGCGATCCTAGGGCGATCA	4.28
253	GGGGACCAGGTGCCGTAAGCTACAGAGTCCACCTCAAGAGGCATGTCTGTATTCGCATGGCTAATGTGATCGGCAAGTTTGGTAAAATCTTCTAAAGTTGATTAGTCTCTCCATATGACTCATAAATATACCGAGTCTAGTATACTACTACTTCCCCAAAGCCTTTAGCACTGACGTTTTGGGCGATCCTAGGGCGATCA	4.66
254	GGGGACCAGGTGCCGTAAGGGTATGGTTCATTACGGTCAACTCGCAAAGAATTTAATGCTCGATGTGGGAATAAGATATCTACATTGGGTAAGTCCCGTTTCATTCCTCTCCATATGACTCATAAATATAATTTCGATTGTCCCACTATCCATAAACCGGTCTTTCAAACAGTAGATTCAAAGCGATCCTAGGGCGATCA	5.4
255	GGGGACCAGGTGCCGTAAGAGGACCACTCAGTTATGTCTATATTACGAGTAGCGCAGATCCAGATCAACTTCCATTGGTTTACTTTTACTGAAGTTTTCCAGGGCATTCTCCATATGACTCATAAATATACTGTACAGAACGTCTTGACCATGGCTACTCTTCAGCAGGTAAACTTTAACAAGCGATCCTAGGGCGATCA	4.43
256	GGGGACCAGGTGCCGTAAGGCGGTAAAACCAGTTTATTCATCCCGCAAGAAAATGGATGATAGCTCTGCAGCTTTTCATTCTATCCATAAGAGCTATGGGATATTTATCTCCATATGACTCATAAATATACTCTACGTCTATATCATTTGAATTCTCGGTTGACTATTAGTGACCATCCTTGGCGATCCTAGGGCGATCA	5.22
257	GGGGACCAGGTGCCGTAAGAGTAACAAGCCTTTAAATCTTTCCTTCATGATCATAGTTTGCAGACCGATAGACCCAAGAGAAGCTATGGCAGAATGTGGTAACGAAATCTCCATATGACTCATAAATATACTTTTTTTCTGTCTATCCAGTGACGCAGAAGTTGAGACAAACGATGCGGGAGGCGATCCTAGGGCGATCA	5.61
258	GGGGACCAGGTGCCGTAAGTAGGGTACTTGACGGCCAATGATATTGTTCTAAGGACGGTTAAAACAGCCAGAGTATCTACTGGCGTACACGGTAGGAATATATGACTTCTCCATATGACTCATAAATATAGAATGATACCAACCCGTCGATATGAGAGTGTATGGTAGAGTGTATAACGGTAGCGATCCTAGGGCGATCA	3.25
259	GGGGACCAGGTGCCGTAAGAACTATCTACAACTACATGCAGTGTAAGGTCGCACATTTGCGCACGCTAGAATATTTCGACGGCTCTTATTTTCTCCTCATAAAAATGTCTCCATATGACTCATAAATATAAATGATGACTGCATCAGATACGATTGCGACTTAAAACTATAGCATGTAGATCGCGATCCTAGGGCGATCA	4.64
260	GGGGACCAGGTGCCGTAAGCATATGTCGTTGTAAATGAAAGTGGGTATTAGTTCTAGGGCATGTAAAATTTAATATGAGACGATGATGAGACCAGAATTGAAATTGTTCTCCATATGACTCATAAATATAAACCTCAATCGTGAACAGACGGGCACTATAACAACCCTCTTTTCCTAATCAAGCGATCCTAGGGCGATCA	4.97
261	GGGGACCAGGTGCCGTAAGTTTGGCAAGTATAAACGCCCAACGGGAAGCCGGAGACGAATCTTTTCAACATCTCCCAATTATATTGACTTTAACATAGCGTTGTCACTCTCCATATGACTCATAAATATATCGTATCAATAGCATCCAACCGATCGAATCATCTGTACATCATTTACCAAACGCGATCCTAGGGCGATCA	4.66
262	GGGGACCAGGTGCCGTAAGTGAGTCGCTTGTACGATTATGGACTATAACAGATAGATAGAGACGCTGTAGTTATGTTAAAGTACCTTAGTAGAAACTGTTGTAGTCTTCTCCATATGACTCATAAATATATTTTCGACGTAGGAATGGCTGAGGCCCGAAAATAACACAACGACTTGAAGGCGCGATCCTAGGGCGATCA	4.05
263	GGGGACCAGGTGCCGTAAGAGGAGGTGTAGGACCCTCTGGCATTTAACTCGGTTAAGGTAATAGTCCTGAAGCTTCACCGCGAGGAATTCAGAGTAAAGAAAATTAATCTCCATATGACTCATAAATATAAATTCTACTCGTCGACTGCTTAGAATTGAGGATACAGTAACCAAACTTCGTAGCGATCCTAGGGCGATCA	4.92
264	GGGGACCAGGTGCCGTAAGCCTATCGAATTGCTTAACAGACTAGTTTTGAAAGGTTAGAATATTTTATTTGGAACAGCGTAATCGACCTCACTCAGTAATTTTCACCTCTCCATATGACTCATAAATATAACAGTCTGACACCGCAACGGCATTGCGCGTAATTTAATCCAGGGCCTAGTACGCGATCCTAGGGCGATCA	4.22
265	GGGGACCAGGTGCCGTAAGACCTTAGCCGACCTCATACTCATTCTCGCAACGGACACGAGCTAGTAATGATTCGTCCGAGTACCTTTAGAGATGGATTGCATCTCATTCTCCATATGACTCATAAATATATTCGAGTTCGTAAGCTCTTAGATTCTGTAACTATCTTCGATTGGACCTATGTGCGATCCTAGGGCGATCA	3.55
266	GGGGACCAGGTGCCGTAAGAGGCCTTTACTTAATCGATATGTGCTTTTAAAAACATTGGACAGCATGACCATTTTGTCAAAAGGAATTTGGCTGTAGGTGAGGTATATCTCCATATGACTCATAAATATACTGTCGCGACTACAAGTGTGTCTATATGCTAATTTTTGCGTATTCTTCGCTGGCGATCCTAGGGCGATCA	5.04
267	GGGGACCAGGTGCCGTAAGGCTGTCACTCACCTTTCAATTCATGCGATGCCATAGGTTATGTGGTGATTGGGGAATTACTTCGTCCCTTATATCCCTGGAACTTGTTTCTCCATATGACTCATAAATATAGCTCATGAACCCGCTTTATGTTGATAGCCTTACAAATATTTATAGCAGTTACGCGATCCTAGGGCGATCA	4.43
[truncated: 1,811 more rows]

## Sheet: constant_flanks_lib_Gal4
ID	sequence	Gal4 binding score (conc 3:1)
[truncated: 2,257 more rows]
